# Supplementary material for: Temperature Load Parameters and Thermal Effects of a Long‐Span Concrete‐Filled Steel Tube Arch Bridge in Tibet
Source: Hindawi journal article supplement (doi:10.1155/2020/9710613), 2020-01-01
Supplement: f1 [file 9710613.f1.zip]

Archive with 12 entries (12 files):
- 9710613.f1/fig.10(a).xls
- 9710613.f1/fig.10(b).xls
- 9710613.f1/fig.11(a).xls
- 9710613.f1/fig.11(b).xls
- 9710613.f1/fig.12(a).xls
- 9710613.f1/fig.12(b).xls
- 9710613.f1/fig.4.xls
- 9710613.f1/fig.5(a).xls
- 9710613.f1/fig.5(b).xls
- 9710613.f1/fig.6(a).xls
- 9710613.f1/fig.6(b).xls
- 9710613.f1/fig.8(a).xls
