# Supplementary material for: Temperature Load Parameters and Thermal Effects of a Long‐Span Concrete‐Filled Steel Tube Arch Bridge in Tibet
Source: Hindawi journal article supplement (doi:10.1155/2020/9710613), 2020-01-01
Supplement: f1 [file 9710613.f1.zip › 9710613.f1/fig.4.xls]

## Sheet: Sheet1
TIME	1	2	3	4	0
0.0972222	29.9	30	29.9	29.9	19.9
0.104167	24.5	24	29.6	21	19.8
0.111111	26.5	25.2	24.2	25	21.2
0.118056	27.1	25.7	24.8	25.9	22
0.125	28.1	27.1	25.1	27.4	21.8
0.131944	28.6	27.2	26.4	27.2	21.5
0.138889	29.2	27.5	26.8	27.5	23
0.145833	29.9	28.7	27.1	28.9	21.4
0.152778	26.2	25.5	28.1	24.7	13.3
0.159722	23.2	23.3	25.5	22.4	11.6
0.166667	20.9	21.5	23.5	20.5	10.6
0.173611	19.4	20.3	21.6	19.6	13
0.180556	21.9	21.7	20.3	21.8	18.8
0.1875	24.6	24.6	21.4	24.3	20
0.194444	27.2	26.2	24.1	26.5	20.4
0.201389	28.4	27.8	25.8	28.3	21.2
0.208333	29.2	29.2	27.4	28.6	21.7
0.215278	29.9	30.2	28.6	29.1	21.8
0.222222	29.6	29.7	29.2	27.8	22
0.229167	30.7	31.3	28.8	29.9	21.8
0.236111	30.4	31.3	30.5	28.9	21.9
0.243056	30.4	31.3	30.5	28.6	22.5
0.25	30.6	31.3	30.4	28.7	23.1
0.256944	30.2	30.9	30.4	28.6	20.2
0.263889	29.2	30	30.2	27.8	19.2
0.270833	27.8	29.1	29.5	27	18.6
0.277778	26.8	28.1	28.6	26.5	19.6
0.284722	26.6	27.8	27.8	26.5	23.3
0.291667	26.9	27.8	27.5	26.9	20.4
0.298611	26.6	21.6	27.2	27.5	18
0.305556	26.2	21.9	27.4	27.7	17.1
0.3125	25.5	22.3	27.5	27.7	16.6
0.319444	25	22.6	27.7	27.8	16.3
0.326389	24.6	22.9	27.7	27.8	16.2
0.333333	24.3	23.1	27.8	28	15.7
0.340278	24	23.3	27.8	28.1	15.6
0.347222	23.7	23.6	27.9	28.1	15.2
0.354167	23.4	23.7	28	28.3	14.7
0.361111	23.1	24	28	28.4	14
0.368056	22.9	24.1	28.1	28.5	13.5
0.375	22.7	24.3	28.1	28.6	13.2
0.381944	22.5	24.5	28.1	28.7	13.4
0.388889	22.3	24.6	28.3	28.9	12.9
0.395833	22.2	24.8	28.3	29.1	13.5
0.402778	21.9	25	28.4	29.2	13.7
0.409722	21.8	25.1	28.4	29.4	14
0.416667	21.6	25.3	28.6	29.6	13.9
0.423611	21.5	25.4	28.7	29.7	13.7
0.430556	21.4	25.5	28.9	30	13.7
0.4375	21.3	25.8	29.1	30.2	13.7
0.444444	21.2	25.9	29.2	30.6	13.7
0.451389	21.2	26.1	29.4	30.7	13.7
0.458333	21.2	26.2	29.6	31.1	13.2
0.465278	21	26.4	29.9	31.5	13.1
0.472222	21	26.5	30.1	31.9	13
0.479167	21	26.8	30.4	32.3	13.1
0.486111	21	26.9	30.7	32.9	13.2
0.493056	21	27.1	31.3	33.3	13
0.5	21	27.3	31.6	33.9	12.9
0.506944	21	27.5	32.2	34.8	12.7
0.513889	21	27.7	32.8	35.4	12.5
0.520833	21	28	33.3	36.3	12.4
0.527778	21	28.2	33.9	37.2	12.3
0.534722	21.2	28.4	34.6	38.2	12.2
0.541667	21.2	28.7	35.4	39.5	12.1
0.548611	21.3	29.1	36.3	40.9	12
0.555556	21.4	29.4	37.2	42.6	12
0.5625	21.6	29.7	38.5	44.2	12
0.569444	21.7	30	39.8	45.9	11.9
0.576389	21.8	30.4	41.1	47.2	11.9
0.583333	22	30.7	42.6	48.5	11.9
0.590278	22.2	31.3	44.2	49.7	11.8
0.597222	22.3	31.8	45.3	50.6	11.7
0.604167	22.5	32.4	46.2	51.9	11.6
0.611111	22.6	33	47.3	53	11.6
0.618056	22.9	33.5	48.1	54.3	11.7
0.625	23.1	34.1	48.9	55.4	11.6
0.631944	23.5	34.6	49.7	56.6	11.7
0.638889	23.8	35.2	50.6	57.9	11.6
0.645833	24.2	35.8	51.4	59	11.4
0.652778	24.5	36.3	51.9	60.3	11.4
0.659722	24.7	37	52.8	61.4	11.3
0.666667	25.1	37.6	53.3	62.8	11.4
0.673611	25.7	38.2	54.3	64.3	11.2
0.680556	26.2	39	54.9	65	11.1
0.6875	26.6	39.8	55.9	66.6	11.1
0.694444	27.4	40.6	56.4	67.5	11
0.701389	28.1	41.7	57.6	68.4	11
0.708333	28.9	42.6	58.2	69.4	10.9
0.715278	29.7	43.5	58.8	70.8	10.7
0.722222	30.6	44.8	59.6	71.7	10.5
0.729167	31.4	46.2	60.7	72.9	10.3
0.736111	32.2	47.7	61.4	73.8	10.1
0.743056	32.8	49.3	62.1	74.6	10
0.75	37	60	62.8	82.6	9.2
0.756944	37.7	61.4	68.4	83.1	9.2
0.763889	38.5	62.1	69.4	84.3	9.2
0.770833	39	63.5	70.3	84.3	9.4
0.777778	39.8	64.3	71.1	84.6	9.7
0.784722	40.6	65.8	71.3	86	9.9
0.791667	41.1	66.7	72.4	86	9.8
0.798611	41.7	67.5	73.4	86	9.8
0.805556	42.6	68.4	73.4	87	9.3
0.8125	43.2	69.4	74.6	87.8	9.3
0.819444	43.9	70.3	75.8	87.8	9.5
0.826389	44.8	71.3	75.8	87.8	9.6
0.833333	45.5	71.8	77	87.8	9.6
0.840278	46.6	72.4	77	88.2	10.1
0.847222	47.3	73.4	78.3	88.9	10.8
0.854167	48.1	74.6	78.3	89.8	11.6
0.861111	48.9	74.6	79.7	89.8	12.8
0.868056	49.7	75.8	79.7	89.8	13.8
0.875	50.3	75.8	81.1	89.8	17.4
0.881944	51	77	81.1	89.8	21.1
0.888889	51.9	78.3	81.1	89.8	22.4
0.895833	52.8	78.3	82.6	90.8	22.7
0.902778	53.4	79.7	82.6	91.6	24.3
0.909722	54.3	79.7	82.6	91.9	25.9
0.916667	55.4	81.1	84.3	91.9	26.2
0.923611	55.9	81.1	84.3	91.9	23.1
0.930556	56.4	81.9	84.3	91.9	25.5
0.9375	57	82.6	85.9	91.9	27.2
0.944444	58.2	82.6	86	91.9	28.3
0.951389	58.8	83.5	86	91.9	29.6
0.958333	60	84.3	86	92.1	29.9
0.965278	60.7	84.3	87.4	92.9	23.6
0.972222	61.4	84.3	87.8	93.2	26.2
0.979167	62.1	84.3	87.8	93.3	25.3
0.986111	62.1	86	87.8	94.1	29.9
0.993056	63.5	86	87.8	94.2	30.7
1	64.3	86	88.3	94.2	27.8
1.00694	64.3	86	89.8	94.2	27.7
1.01389	65	86	89.8	94.2	30.9
1.02083	65.8	86	89.8	94.2	31.2
1.02778	66.7	86	89.8	94.2	26.4
1.03472	66.8	87.8	89.8	94.2	28.7
1.04167	67.5	87.8	89.8	94.2	28
1.04861	67.5	87.8	89.8	94.2	27.4
1.05556	67.5	87.8	89.8	94.2	25.5
1.0625	66.7	87.8	89.9	94.2	24.7
1.06944	66.7	87.8	90.2	94.2	25.4
1.07639	66.7	87.8	90.8	94.2	26.5
1.08333	66.7	87.8	91.4	94.2	26.4
1.09028	66.7	87.8	91.9	94.2	25.7
1.09722	65.9	87.8	91.9	94.2	25.7
1.10417	65.8	87.8	91.9	94.2	25.7
1.11111	65.8	87.8	91.9	94.2	25.8
1.11806	65.1	87.8	91.9	94.2	25.9
1.125	65	87.8	91.9	94.2	25.9
1.13194	65	87.8	91.9	94.2	27.4
1.13889	65.8	87.8	91.9	94.2	27.8
1.14583	65.8	87.8	91.9	94.3	27.8
1.15278	65.8	87.9	91.9	94.5	28.4
1.15972	65.8	87.9	91.9	94.8	29.6
1.16667	66.7	88.5	91.9	95.1	28.6
1.17361	66.7	89.4	91.9	94.8	27.8
1.18056	65.8	89.8	91.9	95.1	27.8
1.1875	65.8	89.8	91.9	95.4	27.3
1.19444	65	89.8	91.9	95.5	26.9
1.20139	64.4	89.8	91.9	95.7	27.1
1.20833	64.3	89.8	91.9	96.5	27.2
1.21528	63.6	89.8	91.9	96.2	26.9
1.22222	63.5	89.8	91.9	96.6	26.9
1.22917	62.8	89.8	91.9	96.6	26.6
1.23611	62.8	89.8	91.9	96.7	24.5
1.24306	62.1	89.8	91.9	96.7	23.2
1.25	61.4	89.8	91.9	96.6	22.4
1.25694	60.7	89.5	91.9	96.6	21.6
1.26389	60	88.8	91.9	96.1	21.3
1.27083	59.4	88	91.9	95.7	21
1.27778	58.8	87.8	91.9	96.4	20.6
1.28472	58.2	87.8	91.9	95.7	20.1
1.29167	58.2	87.8	91.9	96.1	19.6
1.29861	57.6	87.8	92.1	95.1	19
1.30556	57.6	87.8	92.3	95.2	19.8
1.3125	55.9	87.8	92.3	95.2	19.5
1.31944	54.8	87.8	92.2	95.5	19.2
1.32639	53.3	87.8	92.7	95.3	19
1.33333	52.4	87.8	92.7	94.9	18.7
1.34028	51.4	87.8	92.7	94.8	18.5
1.34722	50.6	87.8	92.9	94.8	18.3
1.35417	50.1	87.8	93	94.8	18.2
1.36111	49.7	87.8	93	94.6	17.9
1.36806	46.3	86.4	93.1	94.2	14.3
1.375	46.6	86	91.9	94.2	14.4
1.38194	46.2	86	91.9	94.2	15.3
1.38889	45.8	86	91.9	94.2	15.2
1.39583	45.2	86	92.1	94.2	12.7
1.40278	44.5	86	92	94.2	13.2
1.40972	44.2	86	91.9	94.2	13.9
1.41667	43.9	86	91.9	94.2	14.2
1.42361	43.5	86	91.9	94.2	14.1
1.43056	43.5	86	91.9	94.2	14
1.4375	43.7	86	91.9	94.2	13.7
1.44444	43.9	85.5	91.9	94.2	13.7
1.45139	43.9	84.3	91.9	94.2	13.8
1.45833	43.9	84.3	91.9	94.2	13.7
1.46528	44.2	84.3	91.9	94.2	13.7
1.47222	44.2	84.3	91.9	94.2	13.6
1.47917	44.2	84.3	91.9	94.2	13.5
1.48611	44.2	84.3	91.9	94.2	13.2
1.49306	44.2	84.3	91.9	94.2	12.8
1.5	43.9	84.3	91.9	94.2	12.9
1.50694	43.9	84.3	91.9	94.2	13
1.51389	43.6	83.8	91.9	94.2	13.1
1.52083	43.7	82.7	91.9	94.2	13
1.52778	43.5	82.6	91.9	94.2	13
1.53472	43.5	82.6	91.9	94.2	12.9
1.54167	43.5	82.6	91.9	94.2	12.9
1.54861	43.5	82.6	91.9	94.2	12.9
1.55556	43.5	82.6	91.9	94.1	12.8
1.5625	43.5	82.6	91.9	93.8	12.7
1.56944	43.4	82.6	91.9	93.4	12.6
1.57639	43.5	82.6	91.9	93.7	12.5
1.58333	43.5	82.1	91.9	93.1	12.3
1.59028	43.5	81.1	91.9	92.1	11.8
1.59722	43.2	81.1	91.9	92	11.8
1.60417	43.2	81.1	91.9	91.9	11.8
1.61111	42.9	81.1	91.9	91.9	11.5
1.61806	42.9	81.1	91.9	91.9	10.9
1.625	42.9	81.1	91.9	91.9	10.9
1.63194	42.6	81.1	91.9	91.9	10.9
1.63889	42.3	81.1	91.9	91.9	10.5
1.64583	42	80.6	91.9	91.9	10.4
1.65278	41.7	79.7	91.9	91.9	10.3
1.65972	41.7	79.7	91.5	91.9	10.3
1.66667	41.4	79.7	91	91.9	10
1.67361	41.1	79.7	90.3	91.9	9.9
1.68056	41.1	79.7	89.8	91.9	9.7
1.6875	40.9	79.7	89.8	91.9	9.4
1.69444	40.6	79.7	89.8	91.9	9.3
1.70139	40.3	79.7	89.8	91.7	9.3
1.70833	40.1	78.6	89.8	90.9	9
1.71528	39.5	78.3	89.8	89.8	9.1
1.72222	39.2	78.3	89.8	89.8	9.2
1.72917	39.2	78.3	89.8	89.8	9.6
1.73611	39.2	78.3	89.8	89.8	9.8
1.74306	39.2	78.3	89.8	89.8	9.7
1.75	39.2	78	89.8	89.8	10
1.75694	39	77	89.8	89.8	10.2
1.76389	39	77	89.8	89.8	10.8
1.77083	39	77	89.8	89.8	11
1.77778	39	77	89.8	89.8	11.6
1.78472	39	77	89.8	89.8	12
1.79167	39.2	77	89.8	89.8	12.6
1.79861	39.2	77	89.8	89.8	12.7
1.80556	39.2	77	89.8	89.7	16.1
1.8125	39.5	76.6	89.8	89.8	17.2
1.81944	40	75.8	89.5	89.6	18.2
1.82639	40.6	75.8	89.4	89	17.8
1.83333	41.1	75.8	89.3	89	19.1
1.84028	41.7	75.8	88.8	87.9	20.3
1.84722	42.3	75.8	88.9	88.2	21.6
1.85417	43.2	75.8	88.5	87.9	24
1.86111	43.9	75.8	88.3	87.9	25.3
1.86806	44.5	75.8	88	87.8	24.1
1.875	45.2	75.8	87.8	87.8	26.2
1.88194	45.5	75.6	87.8	87.8	25.8
1.88889	46.2	74.6	87.8	87.8	28
1.89583	46.2	74.6	87.8	87.8	27.7
1.90278	46.7	74.6	87.8	87.8	28.9
1.90972	47.3	74.6	87.8	87.8	29.6
1.91667	47.7	74.6	87.8	87.8	29.6
1.92361	48.3	74.6	87.8	87.8	30
1.93056	48.5	74.6	87.8	87.8	28.4
1.9375	48.5	74.6	87.8	87.8	26.1
1.94444	48.1	74.5	87.8	87.8	26.1
1.95139	48.1	73.5	87.8	87.8	25.8
1.95833	48.1	73.4	87.8	87.4	25.1
1.96528	48.1	73.4	87.8	86.6	23.1
1.97222	47.5	73.4	87.8	86.4	22.4
1.97917	45.8	72.4	87.1	86	25.5
1.98611	46.2	72.4	86	86	25.5
1.99306	46.6	72.4	86	86	22.4
2	46.2	72.4	86	85.9	22.5
2.00694	45.5	72.4	86	85.1	22.2
2.01389	45.2	72.4	86	84.4	22.3
2.02083	44.8	72.4	85.7	84.3	22.2
2.02778	44.5	72.4	84.6	84.3	22.6
2.03472	44.5	72.1	84.3	84.3	23.1
2.04167	44.8	71.3	84.3	84.3	25.8
2.04861	45.2	71.3	84.3	84.3	24.4
2.05556	44.8	71.3	84.3	84.3	23.8
2.0625	44.5	71.3	84.3	84.3	22.9
2.06944	44.2	71.3	84.3	84.3	22.5
2.07639	43.9	71.3	84.3	84.3	22.3
2.08333	43.5	71.3	84.3	84.3	22.4
2.09028	43.2	71.3	84.3	83.8	21.9
2.09722	42.9	71.3	84.3	83.1	21.8
2.10417	42.6	71.2	84.3	82.7	21.8
2.11111	42.6	70.3	83.7	83.6	21.5
2.11806	42.3	70.3	82.6	83.4	21.8
2.125	42.3	70.3	82.6	82.6	21.8
2.13194	42.3	70.3	82.6	82.6	22.2
2.13889	42.2	70.3	82.6	82.6	22.2
2.14583	42	70.3	82.6	82.6	21.9
2.15278	41.8	70.3	82.6	82.6	21.9
2.15972	41.7	70.3	82.6	82.6	22
2.16667	41.7	70.3	82.6	82.6	21.5
2.17361	41.4	69.5	82.6	82.5	21.4
2.18056	41.1	69.4	82.6	81.8	21
2.1875	41.1	69.4	82.6	81.4	20.5
2.19444	40.9	69.4	82.1	81.1	20.4
2.20139	40.8	69.4	81.1	81.1	19.9
2.20833	40.6	69.4	81.1	81.1	19.9
2.21528	40.3	69.4	81.1	81.1	19.7
2.22222	39.8	69.4	81.1	81.1	19.4
2.22917	39.5	69.1	81.1	81.1	19
2.23611	39.4	68.4	81.1	81.1	18.9
2.24306	39.2	68.4	81.1	81.1	18.4
2.25	39	68.4	81.1	80.9	18.5
2.25694	38.8	68.4	81.1	80.1	17.9
2.26389	38.7	68.4	81.1	79.8	17.5
2.27083	38.5	68.4	80.4	79.7	17.3
2.27778	38.2	68.4	79.7	79.7	17.1
2.28472	38.2	68.3	79.7	79.7	16.6
2.29167	38	67.5	79.7	79.7	16.9
2.29861	38	67.5	79.7	79.7	16.6
2.30556	37.8	67.5	79.7	79.7	16.1
2.3125	37.7	67.5	79.7	79.7	16.3
2.31944	37.5	67.5	79.7	79.7	15.8
2.32639	37.5	67.5	79.7	79.5	14.7
2.33333	37.3	67.5	79.7	78.5	14
2.34028	37.2	66.7	79.4	78.3	14
2.34722	37	66.7	78.4	78.3	14.6
2.35417	37	66.7	78.3	78.3	13.7
2.36111	36.8	66.7	78.3	78.3	13.1
2.36806	36.5	66.7	78.3	78.3	12.5
2.375	36.3	66.7	78.3	78.3	12.5
2.38194	36.1	66.7	78.3	78.3	12.3
2.38889	35.7	65.9	78.3	78.2	12
2.39583	35.4	65.8	78.3	77.8	11.6
2.40278	35.2	65.8	78.3	77	11.4
2.40972	35	65.8	77.9	77	11.1
2.41667	34.8	65.8	77	77	10.8
2.42361	34.6	65.8	77	77	10.4
2.43056	34.4	65.7	77	77	10.1
2.4375	34.1	65	77	77	9.7
2.44444	34.1	65	77	77	9.4
2.45139	34.1	65	77	77	9.2
2.45833	33.9	65	77	76.6	9.1
2.46528	33.9	65	77	75.8	8.7
2.47222	33.7	65	76.9	75.8	8.2
2.47917	33.8	64.3	75.9	75.8	8.2
2.48611	33.7	64.3	75.8	75.8	8
2.49306	33.7	64.3	75.8	75.8	7.9
2.5	33.5	64.3	75.8	75.8	7.7
2.50694	33.5	64.3	75.8	75.8	7.7
2.51389	33.3	64.3	75.8	75.7	7.7
2.52083	33.1	63.5	75.8	75.3	7.4
2.52778	33	63.5	75.8	74.6	7.3
2.53472	32.8	63.5	75.8	74.6	7.1
2.54167	32.6	63.5	74.9	74.6	7.1
2.54861	32.4	63.5	74.6	74.6	7.3
2.55556	32.2	63.5	74.6	74.6	7
2.5625	31.9	62.8	74.6	74.6	6.8
2.56944	31.6	62.8	74.6	74.6	6.3
2.57639	31.5	62.8	74.6	74.5	6.6
2.58333	31.5	62.8	74.6	73.9	6.3
2.59028	31.4	62.8	74.6	73.4	6.2
2.59722	31.3	62.6	74.6	73.4	6.3
2.60417	30.9	62.1	73.7	73.4	6.1
2.61111	30.9	62.1	73.4	73.4	5.9
2.61806	30.7	62.1	73.4	73.4	5.9
2.625	30.4	62.1	73.4	73.4	5.9
2.63194	30.2	62.1	73.4	73.4	5.6
2.63889	30	61.4	73.4	73.1	5.2
2.64583	30	61.4	73.4	72.4	5
2.65278	30	61.4	73.4	72.4	5.2
2.65972	30.2	61.4	73.1	72.4	5.2
2.66667	30.2	61.4	72.4	72.4	5
2.67361	30.4	60.8	72.4	72.4	4.9
2.68056	30.4	60.7	72.4	72.4	4.9
2.6875	30.4	60.7	72.4	72.3	4.9
2.69444	30.4	60.7	72.4	71.9	4.9
2.70139	30.4	60.7	72.4	71.4	4.8
2.70833	30.5	60.2	72.4	71.3	4.8
2.71528	30.6	60	72.2	71.3	5
2.72222	30.7	60	71.3	71.3	5.3
2.72917	30.9	60	71.3	71.3	5.6
2.73611	30.9	60	71.3	71.3	5.7
2.74306	30.9	59.7	71.3	71.3	5.8
2.75	31.1	59.4	71.3	70.8	6.3
2.75694	31.1	59.4	71.3	70.3	6.9
2.76389	31.3	59.4	71.3	70.3	12
2.77083	31.6	59.4	71.3	70.3	17.7
2.77778	32.2	59.4	70.9	70.3	20.7
2.78472	32.8	59.2	70.5	70.3	22.1
2.79167	33.3	58.8	70.3	70.3	23
2.79861	33.9	58.8	70.3	70.3	24.9
2.80556	34.8	58.8	70.3	70.3	26.5
2.8125	35.4	58.8	70.3	70.3	26.5
2.81944	35.9	58.8	70.3	69.7	26.4
2.82639	36.3	58.8	70.3	69.8	27.2
2.83333	36.8	58.2	70.3	69.4	28.2
2.84028	37.5	58.2	70.3	69.4	30.6
2.84722	38.2	58.2	70.3	69.4	27
2.85417	38.7	58.2	69.8	69.4	23.7
2.86111	38.7	58.2	69.4	69.4	23
2.86806	38.7	57.8	69.4	69.4	22.3
2.875	38.5	57.6	69.4	68.4	22.7
2.88194	38.5	57.6	69.4	68.4	21.3
2.88889	38.2	57.6	69.4	68.4	23.1
2.89583	38.5	57.6	69.4	68.4	24.5
2.90278	39	57.6	68.5	68.4	22.5
2.90972	39	57	68.4	68.4	25.5
2.91667	39.5	57	68.4	67.8	23.4
2.92361	39.7	57	68.4	67.9	22.5
2.93056	39.6	57	68.4	67.5	25.1
2.9375	40	57	68.4	67.5	26.5
2.94444	40.6	57	68.4	67.5	24.4
2.95139	40.3	56.6	67.8	67.5	25.1
2.95833	40.3	56.4	67.5	67.5	23.1
2.96528	40	56.4	67.5	67.1	23.1
2.97222	39.5	56.4	67.5	66.7	22.3
2.97917	39.2	56.4	67.5	66.7	22.5
2.98611	39	56.4	67.5	66.7	21.1
2.99306	38.5	56.4	67.5	66.7	20.4
3	38	55.9	66.7	66.7	19.5
3.00694	37.2	55.9	66.7	66	18.6
3.01389	36.5	55.9	66.7	65.9	18.3
3.02083	35.9	55.9	66.7	65.8	18.4
3.02778	35.6	55.9	66.7	65.8	19.1
3.03472	35.4	55.9	66.7	65.8	18
3.04167	35	55.9	65.8	65.8	17.2
3.04861	34.6	55.4	65.8	65.6	17
3.05556	34.4	55.4	65.8	65	17.1
3.0625	34.4	55.4	65.8	65	18.8
3.06944	34.7	55.4	65.8	65	22.3
3.07639	35.4	55.4	65.8	65	24.7
3.08333	36.3	55.4	65.7	65	22.7
3.09028	36.5	55.4	65	65	20.2
3.09722	36.1	55.1	65	64.6	18.4
3.10417	35.4	54.8	65	64.3	18
3.11111	34.8	54.8	65	64.3	16.6
3.11806	34.1	54.8	65	64.3	15.9
3.125	33.5	54.8	65	64.3	15
3.13194	33	54.8	64.3	64.3	13.5
3.13889	32.2	54.7	64.3	63.7	13.9
3.14583	31.8	54.3	64.3	63.7	14.1
3.15278	31.6	54.3	64.3	63.5	13.8
3.15972	31.5	54.3	64.3	63.5	13.1
3.16667	31.3	54.3	64.3	63.5	12.7
3.17361	31.1	54.3	63.5	63.5	12.7
3.18056	31.1	54.2	63.5	63	12.1
3.1875	30.9	53.8	63.5	62.8	11.1
3.19444	30.7	53.8	63.5	62.8	10.7
3.20139	30.3	53.8	63.5	62.8	10.4
3.20833	29.9	53.8	63.5	62.8	9.9
3.21528	29.6	53.8	62.8	62.8	9.8
3.22222	29.1	53.4	62.8	62.2	9.5
3.22917	28.7	53.3	62.8	62.1	9.3
3.23611	28.4	53.3	62.8	62.1	8.5
3.24306	27.8	53.3	62.8	62.1	8.3
3.25	27.4	53.3	62.8	62.1	7.6
3.25694	26.8	52.9	62.1	62.1	7.4
3.26389	26.4	52.8	62.1	61.6	7.5
3.27083	26.4	52.8	62.1	61.4	7.1
3.27778	26.4	52.8	62.1	61.4	7.1
3.28472	26.4	52.8	62.1	61.4	6.9
3.29167	26.4	52.4	62.1	61.4	6.8
3.29861	26.4	52.4	61.6	61.4	6.9
3.30556	26.5	52.4	61.4	60.9	7.1
3.3125	26.5	52.4	61.4	60.7	7.2
3.31944	26.5	52.4	61.4	60.7	7
3.32639	26.5	51.9	61.4	60.7	7.1
3.33333	26.6	51.9	61.4	60.7	7.3
3.34028	26.6	51.9	61	60.7	7.4
3.34722	26.6	51.9	60.7	60.5	7.3
3.35417	26.6	51.5	60.7	60	7.1
3.36111	26.5	51.4	60.7	60	7.1
3.36806	26.5	51.4	60.7	60	7
3.375	26.4	51.4	60.7	60	7
3.38194	26.2	51.3	60.6	60	6.9
3.38889	26.2	51	60	59.7	7.2
3.39583	26.2	51	60	59.4	7.3
3.40278	26.2	51	60	59.4	7.3
3.40972	26.2	51	60	59.4	7.3
3.41667	26.2	50.6	60	59.4	7.4
3.42361	26.1	50.6	60	59.4	7.5
3.43056	26.1	50.6	59.4	59	7.6
3.4375	25.9	50.6	59.4	58.8	7.4
3.44444	25.9	50.1	59.4	58.8	7.3
3.45139	25.9	50.1	59.4	58.8	7
3.45833	25.8	50.1	59.4	58.8	7
3.46528	25.7	50.1	59.2	58.8	7.3
3.47222	25.5	49.7	58.8	58.4	7.5
3.47917	25.4	49.7	58.8	58.2	7.4
3.48611	25.4	49.7	58.8	58.2	7.3
3.49306	25.3	49.7	58.8	58.2	7.1
3.5	25.3	49.3	58.8	58.2	7
3.50694	25.1	49.3	58.4	58	6.8
3.51389	25.1	49.3	58.2	57.6	6.7
3.52083	25.1	49.1	58.2	57.6	6.5
3.52778	25.1	48.9	58.2	57.6	6.4
3.53472	25.1	48.9	58.2	57.6	6.2
3.54167	25.1	48.9	58.2	57.5	6
3.54861	25	48.5	57.6	57	6.2
3.55556	24.9	48.5	57.6	57	6.5
3.5625	24.9	48.5	57.6	57	6.5
3.56944	24.9	48.5	57.6	57	6.5
3.57639	24.9	48.1	57.6	56.9	6.5
3.58333	24.7	48.1	57	56.5	6.5
3.59028	24.6	48.1	57	56.4	6.3
3.59722	24.5	48.1	57	56.4	6.1
3.60417	24.3	47.7	57	56.4	6
3.61111	24.1	47.7	57	56.4	5.9
3.61806	24	47.7	56.5	55.9	6
3.625	23.8	47.3	56.4	55.9	6.2
3.63194	23.6	47.3	56.4	55.9	5.5
3.63889	23.2	47.3	56.4	55.9	5.3
3.64583	22.7	47.3	56.4	55.4	5.1
3.65278	22.2	47	55.9	55.4	5.2
3.65972	21.7	47	55.9	55.4	5.1
3.66667	21.4	47	55.9	55.4	4.9
3.67361	21	46.6	55.9	55.2	4.9
3.68056	20.8	46.6	55.9	54.8	5
3.6875	20.7	46.6	55.4	54.8	5
3.69444	20.7	46.5	55.4	54.8	5
3.70139	20.8	46.2	55.4	54.8	5
3.70833	20.8	46.2	55.4	54.3	5.2
3.71528	20.9	46.2	55.2	54.3	5.2
3.72222	20.9	45.9	54.8	54.3	4.4
3.72917	20.9	45.9	54.8	54.3	4.3
3.73611	20.8	45.9	54.8	54.1	4.2
3.74306	20.8	45.5	54.8	53.8	4
3.75	20.7	45.5	54.5	53.8	4.1
3.75694	20.7	45.5	54.3	53.8	4.1
3.76389	20.7	45.2	54.3	53.8	4.3
3.77083	20.7	45.2	54.3	53.4	4.3
3.77778	20.8	45.2	54.3	53.3	4.5
3.78472	20.8	44.9	53.8	53.3	4.6
3.79167	20.9	44.8	53.8	53.3	4.6
3.79861	20.9	44.8	53.8	53.1	5
3.80556	21.2	44.7	53.8	52.8	5.9
3.8125	21.3	44.5	53.6	52.8	6.7
3.81944	21.5	44.5	53.3	52.8	7.1
3.82639	21.7	44.5	53.3	52.8	7.6
3.83333	21.9	44.2	53.3	52.4	8.3
3.84028	22.3	44.2	53.3	52.4	8.5
3.84722	22.5	44.2	52.8	52.4	8.9
3.85417	22.7	43.9	52.8	52.4	9.6
3.86111	23.1	43.9	52.8	52	10.3
3.86806	23.3	43.9	52.8	51.9	11.4
3.875	23.8	43.5	52.7	51.9	12
3.88194	24.3	43.5	52.4	51.9	13.9
3.88889	24.9	43.5	52.4	51.7	15
3.89583	25.4	43.3	52.4	51.4	15.1
3.90278	25.8	43.2	52.4	51.4	16.2
3.90972	26.2	43.2	52.2	51.4	16.4
3.91667	26.6	43.2	51.9	51.4	16.5
3.92361	27.1	42.9	51.9	51	16.9
3.93056	27.5	42.9	51.9	51	17
3.9375	27.8	42.9	51.9	51	17.2
3.94444	28.1	42.6	51.4	51	16.4
3.95139	28.1	42.6	51.4	50.6	16.9
3.95833	28.3	42.6	51.4	50.6	17
3.96528	28.4	42.6	51.4	50.6	16.5
3.97222	28.4	42.3	51	50.4	15
3.97917	28	42.3	51	50.1	14.7
3.98611	27.7	42.3	51	50.1	14.4
3.99306	27.4	42	51	50.1	14.4
4	27.1	42	50.6	49.8	14.4
4.00694	26.9	42	50.6	49.7	14.7
4.01389	26.8	42	50.6	49.7	15.3
4.02083	26.8	41.7	50.5	49.7	15.4
4.02778	26.8	41.7	50.1	49.4	15.5
4.03472	26.8	41.7	50.1	49.3	15.5
4.04167	26.8	41.7	50.1	49.3	15.6
4.04861	26.8	41.4	50.1	49.3	15.6
4.05556	26.7	41.4	49.7	48.9	15.9
4.0625	26.8	41.4	49.7	48.9	16.4
4.06944	26.9	41.4	49.7	48.9	16.7
4.07639	27.1	41.2	49.6	48.9	16.7
4.08333	27.1	41.1	49.3	48.5	15.9
4.09028	26.9	41.1	49.3	48.5	15.9
4.09722	26.8	41.1	49.3	48.5	15.3
4.10417	26.6	41.1	49.1	48.5	13.9
4.11111	26.2	40.9	48.9	48.1	13.4
4.11806	25.8	40.9	48.9	48.1	13.2
4.125	25.5	40.9	48.9	48.1	13.1
4.13194	25.3	40.9	48.5	47.9	12.6
4.13889	25.1	40.6	48.5	47.7	12.4
4.14583	24.9	40.6	48.5	47.7	12.3
4.15278	24.7	40.6	48.5	47.7	12.1
4.15972	24.6	40.6	48.1	47.4	11.7
4.16667	24.3	40.3	48.1	47.3	11.5
4.17361	24.2	40.3	48.1	47.3	11.6
4.18056	24.1	40.3	48	47.3	11.3
4.1875	23.8	40.3	47.7	47	11.1
4.19444	23.7	40.1	47.7	47	10.9
4.20139	23.5	40	47.7	47	10.4
4.20833	23.2	40	47.5	47	10
4.21528	23	40	47.3	46.6	9.8
4.22222	22.7	39.9	47.3	46.6	9.7
4.22917	22.6	39.8	47.3	46.6	9.5
4.23611	22.5	39.8	47	46.6	9.3
4.24306	22.4	39.8	47	46.2	9.2
4.25	22.4	39.6	47	46.2	9.2
4.25694	22.4	39.5	47	46.2	8.8
4.26389	22.3	39.5	46.6	46	8.2
4.27083	22.3	39.5	46.6	45.9	8
4.27778	22.3	39.2	46.6	45.9	7.9
4.28472	22.2	39.2	46.6	45.9	7.5
4.29167	22.2	39.2	46.2	45.5	7.3
4.29861	22	39.2	46.2	45.5	7
4.30556	22	39	46.2	45.5	7
4.3125	21.9	39	46.2	45.5	7.1
4.31944	21.7	39	45.9	45.2	6.8
4.32639	21.6	39	45.9	45.2	6.6
4.33333	21.4	38.7	45.9	45.2	6.2
4.34028	21.3	38.7	45.7	45.2	6.2
4.34722	21.2	38.7	45.5	44.8	6
4.35417	21	38.5	45.5	44.8	5.6
4.36111	20.9	38.5	45.5	44.8	5.4
4.36806	20.8	38.5	45.4	44.7	5
4.375	20.7	38.4	45.2	44.5	4.8
4.38194	20.6	38.2	45.2	44.5	4.7
4.38889	20.5	38.2	45.2	44.5	4.8
4.39583	20.4	38.2	44.9	44.2	4.4
4.40278	20.3	38	44.8	44.2	4.2
4.40972	20.3	38	44.8	44.2	4.2
4.41667	20.2	38	44.8	44.2	4.2
4.42361	20.1	37.8	44.5	43.9	4
4.43056	20	37.7	44.5	43.9	4.1
4.4375	19.8	37.7	44.5	43.9	3.9
4.44444	19.7	37.7	44.5	43.7	3.6
4.45139	19.5	37.5	44.2	43.5	3.5
4.45833	19.4	37.5	44.2	43.5	3.5
4.46528	19.4	37.5	44.2	43.5	3.3
4.47222	19.3	37.2	44.1	43.2	3.1
4.47917	19.3	37.2	43.9	43.2	3.3
4.48611	19.3	37.2	43.9	43.2	3.2
4.49306	19.1	37	43.9	43.2	3.1
4.5	19	37	43.6	42.9	3
4.50694	18.8	37	43.5	42.9	3
4.51389	18.7	36.8	43.5	42.9	2.8
4.52083	18.5	36.8	43.5	42.6	2.5
4.52778	18.5	36.8	43.2	42.6	2.5
4.53472	18.5	36.5	43.2	42.6	2.4
4.54167	18.4	36.5	43.2	42.6	2.3
4.54861	18.3	36.5	43.2	42.3	2.2
4.55556	18.2	36.3	42.9	42.3	2.2
4.5625	18.1	36.3	42.9	42.3	2.1
4.56944	18	36.3	42.9	42	2.2
4.57639	17.9	36.1	42.6	42	1.9
4.58333	17.8	36.1	42.6	42	1.7
4.59028	17.8	35.9	42.6	41.8	1.7
4.59722	17.8	35.9	42.6	41.7	1.5
4.60417	17.7	35.9	42.3	41.7	1.5
4.61111	17.7	35.6	42.3	41.7	1.6
4.61806	17.6	35.6	42.3	41.4	1.6
4.625	17.6	35.6	42	41.4	1.8
4.63194	17.5	35.4	42	41.4	2
4.63889	17.4	35.4	42	41.1	2.2
4.64583	17.4	35.4	42	41.1	2.3
4.65278	17.4	35.2	41.7	41.1	2.2
4.65972	17.3	35.2	41.7	40.9	2.4
4.66667	17.2	35.1	41.7	40.9	2.2
4.67361	17.1	35	41.5	40.9	2.2
4.68056	17.1	35	41.4	40.8	2.5
4.6875	17.2	34.8	41.4	40.6	2.8
4.69444	17.3	34.8	41.4	40.6	2.8
4.70139	17.4	34.8	41.1	40.6	2.7
4.70833	17.4	34.6	41.1	40.3	2.6
4.71528	17.5	34.6	41.1	40.3	3.1
4.72222	17.6	34.5	40.9	40.3	3.3
4.72917	17.6	34.4	40.9	40	3.5
4.73611	17.6	34.4	40.9	40	3.8
4.74306	17.6	34.1	40.8	40	4.1
4.75	17.6	34.1	40.6	39.8	4.4
4.75694	17.6	34.1	40.6	39.8	4.9
4.76389	17.7	33.9	40.6	39.8	9.5
4.77083	18	33.9	40.3	39.6	15.8
4.77778	18.7	33.9	40.3	39.5	18.4
4.78472	19.5	33.7	40.3	39.5	19.6
4.79167	20.2	33.7	40.3	39.5	19.7
4.79861	21	33.7	40	39.2	20.6
4.80556	26.1	33.1	40	38.7	25.4
4.8125	26.8	33	39.2	38.5	26.2
4.81944	27.4	33	39.2	38.5	26.1
4.82639	28	33	39.2	38.5	23
4.83333	28.1	32.8	39.1	38.2	20.6
4.84028	28.1	32.8	39	38.2	21.8
4.84722	28.3	32.8	39	38.2	20.8
4.85417	28.3	32.8	38.9	38	20
4.86111	28.1	32.6	38.7	38	18.5
4.86806	27.8	32.6	38.7	37.8	20.7
4.875	28	32.6	38.6	37.7	19.5
4.88194	28.1	32.6	38.5	37.7	20.2
4.88889	28.3	32.4	38.5	37.5	20.1
4.89583	28.6	32.4	38.4	37.5	21.8
4.90278	29.1	32.4	38.2	37.5	20.5
4.90972	29.4	32.4	38.2	37.4	20
4.91667	29.6	32.4	38.2	37.2	19.8
4.92361	29.8	32.4	38	37.2	20.7
4.93056	30	32.2	38	37.2	18.7
4.9375	29.6	32.2	37.9	37	17.5
4.94444	28.7	32.2	37.7	37	19.1
4.95139	28.9	32.2	37.7	37	20.5
4.95833	29.2	32.2	37.7	36.8	21.3
4.96528	29.6	32.2	37.5	36.8	19.1
4.97222	29.1	32.2	37.5	36.8	18.8
4.97917	28.9	32.1	37.5	36.5	20.8
4.98611	28.9	32	37.2	36.5	18.3
4.99306	28.4	32	37.2	36.5	17.5
5	27.7	32	37.2	36.3	16.9
5.00694	26.9	32	37	36.3	16.3
5.01389	26.4	32	37	36.3	16.1
5.02083	25.8	32	37	36.2	16.1
5.02778	25.4	32	36.8	36.1	16.4
5.03472	25.3	32	36.8	36.1	17.3
5.04167	25.3	32	36.8	36.1	18.1
5.04861	25.5	32	36.6	35.9	19.5
5.05556	25.8	31.9	36.5	35.9	19.2
5.0625	26.1	31.8	36.5	35.9	18.5
5.06944	25.9	31.8	36.5	35.9	17.7
5.07639	25.7	31.8	36.3	35.6	16.9
5.08333	25.4	31.8	36.3	35.6	16
5.09028	25	31.8	36.3	35.6	15.2
5.09722	24.5	31.8	36.2	35.6	14.5
5.10417	24.1	31.8	36.1	35.4	14.4
5.11111	23.7	31.8	36.1	35.4	13.9
5.11806	23.5	31.8	36.1	35.4	13.3
5.125	23.1	31.7	35.9	35.4	13.1
5.13194	23	31.6	35.9	35.2	12.3
5.13889	22.7	31.6	35.9	35.2	12.5
5.14583	22.6	31.6	35.8	35.2	12.3
5.15278	22.4	31.6	35.6	35.2	11.7
5.15972	22.2	31.6	35.6	35	10.9
5.16667	22	31.6	35.6	35	10.5
5.17361	21.8	31.6	35.5	35	10.4
5.18056	21.6	31.5	35.4	35	9.6
5.1875	21.4	31.5	35.4	34.8	9.2
5.19444	21.3	31.5	35.4	34.8	9.1
5.20139	21	31.5	35.2	34.8	8.8
5.20833	20.9	31.5	35.2	34.8	8.7
5.21528	20.7	31.3	35.2	34.6	8.5
5.22222	20.5	31.3	35.2	34.6	8
5.22917	20.4	31.3	35	34.6	7.4
5.23611	20.2	31.3	35	34.6	7.5
5.24306	20.1	31.3	35	34.5	7.3
5.25	20	31.2	35	34.4	7.2
5.25694	19.9	31.1	34.8	34.4	7.1
5.26389	19.7	31.1	34.8	34.4	6.9
5.27083	19.6	31.1	34.8	34.4	6.7
5.27778	19.5	31.1	34.8	34.1	6.7
5.28472	19.3	30.9	34.6	34.1	6.3
5.29167	19.2	30.9	34.6	34.1	5.8
5.29861	19.1	30.9	34.6	34.1	6.1
5.30556	19	30.9	34.6	33.9	6.1
5.3125	18.9	30.7	34.4	33.9	5.9
5.31944	18.7	30.7	34.4	33.9	5.8
5.32639	18.6	30.7	34.4	33.9	6
5.33333	18.5	30.7	34.4	33.7	5.8
5.34028	18.3	30.6	34.3	33.7	5.5
5.34722	18.2	30.6	34.1	33.7	5.2
5.35417	18.1	30.6	34.1	33.7	4.9
5.36111	18	30.5	34.1	33.6	4.8
5.36806	18	30.4	34.1	33.5	4.6
5.375	17.9	30.4	33.9	33.5	4.6
5.38194	17.8	30.4	33.9	33.5	4.5
5.38889	17.7	30.2	33.9	33.3	4.5
5.39583	17.5	30.2	33.9	33.3	4.5
5.40278	17.4	30.2	33.7	33.3	4.4
5.40972	17.3	30	33.7	33.3	4.2
5.41667	17.2	30	33.7	33.1	4
5.42361	17.1	30	33.7	33.1	3.8
5.43056	17	29.9	33.5	33.1	3.7
5.4375	16.9	29.9	33.5	33.1	3.4
5.44444	16.8	29.9	33.5	33	3.3
5.45139	16.6	29.8	33.5	33	3.2
5.45833	16.5	29.7	33.3	33	3.1
5.46528	16.4	29.7	33.3	32.8	2.9
5.47222	16.3	29.6	33.3	32.8	2.7
5.47917	16.2	29.6	33.3	32.8	2.7
5.48611	16.1	29.6	33.1	32.8	2.6
5.49306	15.9	29.4	33.1	32.6	2.3
5.5	15.9	29.4	33.1	32.6	2.1
5.50694	15.8	29.4	33.1	32.6	2.2
5.51389	15.8	29.2	33	32.5	2
5.52083	15.7	29.2	33	32.4	1.9
5.52778	15.6	29.2	33	32.4	1.7
5.53472	15.5	29.1	32.8	32.4	1.7
5.54167	15.5	29.1	32.8	32.2	1.7
5.54861	15.3	29	32.8	32.2	1.6
5.55556	15.2	28.9	32.8	32.2	1.6
5.5625	15.1	28.9	32.6	32	1.5
5.56944	15	28.7	32.6	32	1.4
5.57639	14.8	28.7	32.6	32	0.9
5.58333	14.7	28.7	32.6	32	1
5.59028	14.7	28.6	32.4	31.8	1
5.59722	14.6	28.6	32.4	31.8	0.9
5.60417	14.5	28.5	32.4	31.8	1.2
5.61111	14.4	28.4	32.2	31.6	1.1
5.61806	14.3	28.4	32.2	31.6	0.9
5.625	14.3	28.3	32.2	31.6	0.9
5.63194	14.2	28.3	32.2	31.5	1
5.63889	14.2	28.2	32	31.5	1.2
5.64583	14.2	28.1	32	31.5	1.4
5.65278	14.1	28.1	32	31.3	1.5
5.65972	14.1	28	31.8	31.3	1.4
5.66667	14.1	28	31.8	31.3	1.6
5.67361	14.2	27.8	31.8	31.2	1.7
5.68056	14.2	27.8	31.8	31.1	2
5.6875	14.3	27.8	31.6	31.1	2.2
5.69444	14.4	27.7	31.6	31.1	2.5
5.70139	14.4	27.7	31.6	30.9	3.2
5.70833	14.5	27.5	31.5	30.9	7.1
5.71528	14.9	27.5	31.5	30.9	15.7
5.72222	15.7	27.5	31.5	30.7	20.3
5.72917	16.5	27.4	31.5	30.7	22
5.73611	17.5	27.4	31.3	30.7	22.4
5.74306	18.2	27.4	31.3	30.7	22.9
5.75	19	27.2	31.3	30.6	23.3
5.75694	19.7	27.2	31.3	30.6	23.6
5.76389	20.5	27.1	31.1	30.6	24.9
5.77083	21.4	27.1	31.1	30.4	26.5
5.77778	22.2	27.1	31.1	30.4	26.6
5.78472	22.7	26.9	30.9	30.4	26.6
5.79167	23.3	26.9	30.9	30.2	27.1
5.79861	24	26.9	30.9	30.2	28
5.80556	24.6	26.8	30.9	30.2	28
5.8125	25.3	26.8	30.7	30	28.7
5.81944	25.9	26.8	30.7	30	30
5.82639	26.9	26.7	30.7	30	29.9
5.83333	27.8	26.6	30.6	29.9	29.9
5.84028	28.6	26.6	30.6	29.9	31.5
5.84722	29.2	26.6	30.6	29.9	30.2
5.85417	30	26.5	30.4	29.7	29
5.86111	30.6	26.5	30.4	29.7	28.7
5.86806	31.2	26.5	30.4	29.7	27.2
5.875	31.5	26.5	30.2	29.6	26.6
5.88194	31.7	26.5	30.2	29.6	25.8
5.88889	31.8	26.5	30.2	29.5	24.9
5.89583	31.7	26.4	30	29.4	23.7
5.90278	31.5	26.4	30	29.4	22.9
5.90972	31.3	26.4	30	29.2	22.2
5.91667	30.9	26.4	29.9	29.2	22.2
5.92361	30.6	26.4	29.9	29.2	22.5
5.93056	30.6	26.4	29.9	29.1	22.9
5.9375	30.6	26.4	29.7	29.1	23.2
5.94444	30.7	26.4	29.7	29.1	23.3
5.95139	30.9	26.4	29.7	28.9	24
5.95833	31.1	26.4	29.6	28.9	23.2
5.96528	30.9	26.4	29.6	28.9	23.3
5.97222	30.9	26.4	29.6	28.9	23.6
5.97917	30.9	26.4	29.4	28.7	23.7
5.98611	30.9	26.4	29.4	28.7	23.8
5.99306	30.7	26.4	29.4	28.7	23.8
6	30.7	26.4	29.3	28.7	25.3
6.00694	30.9	26.5	29.2	28.6	24
6.01389	30.7	26.5	29.2	28.6	23.8
6.02083	30.6	26.5	29.2	28.6	24.1
6.02778	30.4	26.5	29.1	28.5	24.1
6.03472	30.2	26.5	29.1	28.4	25.4
6.04167	30.2	26.5	29.1	28.4	24.6
6.04861	30.2	26.5	29	28.4	24.1
6.05556	29.9	26.5	28.9	28.4	23.3
6.0625	29.4	26.6	28.9	28.4	23.6
6.06944	29.1	26.6	28.9	28.3	23.2
6.07639	28.7	26.6	28.9	28.3	21.8
6.08333	28.1	26.6	28.7	28.3	19.9
6.09028	27.4	26.6	28.7	28.3	18.9
6.09722	26.8	26.6	28.7	28.2	18.1
6.10417	26.2	26.6	28.7	28.1	17.6
6.11111	25.7	26.6	28.6	28.1	17.3
6.11806	25.3	26.6	28.6	28.1	16.7
6.125	24.9	26.6	28.6	28.1	16.1
6.13194	24.5	26.8	28.6	28.1	15.9
6.13889	24.1	26.8	28.4	28	15.4
6.14583	23.8	26.8	28.4	28	14.7
6.15278	23.6	26.8	28.4	28	14.2
6.15972	23.2	26.8	28.4	28	14
6.16667	23	26.8	28.4	28	13.4
6.17361	22.7	26.8	28.3	28	13.2
6.18056	22.5	26.8	28.3	28	12.9
6.1875	22.2	26.8	28.3	27.9	12.5
6.19444	21.9	26.8	28.3	27.8	11.9
6.20139	21.8	26.8	28.3	27.8	11.5
6.20833	21.6	26.8	28.1	27.8	11.3
6.21528	21.4	26.8	28.1	27.8	10.9
6.22222	21.2	26.8	28.1	27.8	11
6.22917	21	26.8	28.1	27.8	10.9
6.23611	20.8	26.8	28.1	27.8	10.2
6.24306	20.6	26.8	28.1	27.7	10.1
6.25	20.5	26.8	28.1	27.7	10.3
6.25694	20.3	26.8	28	27.7	9.9
6.26389	20.1	26.8	28	27.7	9.7
6.27083	20	26.7	28	27.7	9.2
6.27778	19.8	26.6	28	27.7	9.3
6.28472	19.6	26.6	28	27.7	9.2
6.29167	19.4	26.6	28	27.7	8.8
6.29861	19.3	26.6	28	27.5	8.5
6.30556	19.1	26.6	27.8	27.5	8.3
6.3125	18.9	26.6	27.8	27.5	8
6.31944	18.7	26.6	27.8	27.5	7.7
6.32639	18.5	26.6	27.8	27.5	7.5
6.33333	18.3	26.5	27.8	27.5	7.4
6.34028	18.2	26.5	27.8	27.5	7.1
6.34722	18	26.5	27.8	27.5	7
6.35417	17.9	26.5	27.7	27.4	6.8
6.36111	17.8	26.5	27.7	27.4	6.7
6.36806	17.7	26.4	27.7	27.4	6.5
6.375	17.5	26.4	27.7	27.4	6.3
6.38194	15.9	25.9	27.7	27.1	5.1
6.38889	15.9	25.9	27.4	27.1	4.9
6.39583	15.8	25.9	27.4	26.9	4.6
6.40278	15.7	25.8	27.4	26.9	4.5
6.40972	15.6	25.8	27.4	26.9	4.5
6.41667	15.5	25.8	27.4	26.9	4.4
6.42361	15.4	25.7	27.3	26.9	4.4
6.43056	15.3	25.7	27.2	26.9	4.3
6.4375	15.2	25.7	27.2	26.8	4
6.44444	15.1	25.6	27.2	26.8	3.9
6.45139	15	25.5	27.2	26.8	4
6.45833	14.9	25.5	27.2	26.8	4
6.46528	14.8	25.5	27.1	26.7	3.9
6.47222	14.6	25.4	27.1	26.6	3.8
6.47917	14.4	25.4	27.1	26.6	3.6
6.48611	14.3	25.3	27.1	26.6	3.4
6.49306	14.2	25.3	27.1	26.6	3.3
6.5	14.2	25.3	27.1	26.5	3.2
6.50694	14.1	25.1	26.9	26.5	3.3
6.51389	14.1	25.1	26.9	26.5	3.2
6.52083	14	25.1	26.9	26.5	3.1
6.52778	14	25	26.9	26.4	3.2
6.53472	13.9	25	26.9	26.4	3.4
6.54167	13.9	25	26.8	26.4	3.3
6.54861	13.7	24.9	26.8	26.4	3.4
6.55556	13.7	24.9	26.8	26.3	3.4
6.5625	13.7	24.8	26.8	26.2	3.5
6.56944	13.7	24.7	26.8	26.2	3.4
6.57639	13.7	24.7	26.7	26.2	3.6
6.58333	13.6	24.6	26.6	26.2	3.6
6.59028	13.7	24.6	26.6	26.1	3.7
6.59722	13.7	24.6	26.6	26.1	3.8
6.60417	13.7	24.5	26.6	26.1	4
6.61111	13.8	24.5	26.5	26	4.4
6.61806	13.9	24.3	26.5	25.9	4.8
6.625	14	24.3	26.5	25.9	9.7
6.63194	14.3	24.3	26.5	25.9	16.1
6.63889	15	24.2	26.5	25.9	17.4
6.64583	15.7	24.2	26.4	25.8	17.1
6.65278	16.4	24.2	26.4	25.8	18.5
6.65972	17.2	24.1	26.4	25.8	19
6.66667	18	24.1	26.4	25.8	21.9
6.67361	18.8	24.1	26.4	25.7	23.1
6.68056	19.5	24	26.3	25.7	24
6.6875	20.2	24	26.2	25.7	25
6.69444	20.8	24	26.2	25.7	25.7
6.70139	21.5	23.8	26.2	25.5	26.1
6.70833	22	23.8	26.2	25.5	26.4
6.71528	22.6	23.8	26.1	25.5	27.2
6.72222	23.2	23.7	26.1	25.5	26.9
6.72917	23.7	23.7	26.1	25.4	26.8
6.73611	24.1	23.7	26.1	25.4	27.2
6.74306	24.6	23.7	25.9	25.4	27.8
6.75	25.1	23.6	25.9	25.3	27.1
6.75694	25.7	23.6	25.9	25.3	27.8
6.76389	26.4	23.6	25.9	25.3	27.8
6.77083	26.8	23.6	25.8	25.2	27.1
6.77778	27.4	23.5	25.8	25.1	27.5
6.78472	27.8	23.5	25.8	25.1	27.5
6.79167	28.3	23.5	25.8	25.1	27.5
6.79861	28.7	23.5	25.7	25	27.7
6.80556	29.2	23.5	25.7	25	27.7
6.8125	29.7	23.5	25.7	25	27.8
6.81944	30	23.5	25.6	25	28.1
6.82639	30.6	23.5	25.5	24.9	29.3
6.83333	30.9	23.5	25.5	24.9	28.6
6.84028	31.5	23.5	25.5	24.9	29.1
6.84722	31.8	23.5	25.4	24.8	29.9
6.85417	32.2	23.5	25.4	24.7	29.9
6.86111	32.4	23.5	25.4	24.7	30.9
6.86806	32.8	23.5	25.4	24.7	30.6
6.875	33	23.5	25.3	24.7	31.8
6.88194	33	23.5	25.3	24.6	28.1
6.88889	32.4	23.5	25.3	24.6	26.8
6.89583	31.6	23.5	25.3	24.6	27.4
6.90278	31.3	23.6	25.1	24.6	26.5
6.90972	30.7	23.6	25.1	24.5	25.5
6.91667	30.4	23.6	25.1	24.5	26.8
6.92361	30.2	23.6	25.1	24.5	28
6.93056	30.4	23.6	25	24.5	29.7
6.9375	30.6	23.7	25	24.5	26.9
6.94444	30.4	23.7	25	24.5	28.7
6.95139	30	23.7	25	24.3	28.1
6.95833	29.9	23.7	25	24.3	27.4
6.96528	29.4	23.8	24.9	24.3	24.7
6.97222	28.7	23.8	24.9	24.3	23.8
6.97917	28.1	23.8	24.9	24.3	23.6
6.98611	27.5	23.8	24.9	24.3	23
6.99306	26.9	23.8	24.9	24.3	23
7	26.6	24	24.7	24.3	22.5
7.00694	26.3	24	24.7	24.2	22.4
7.01389	25.9	24	24.7	24.2	21.2
7.02083	25.5	24	24.7	24.2	20.7
7.02778	25.1	24	24.7	24.2	20
7.03472	24.7	24.1	24.7	24.2	19.8
7.04167	24.3	24.1	24.7	24.2	19.7
7.04861	24.1	24.1	24.6	24.2	18.9
7.05556	23.8	24.1	24.6	24.2	18.2
7.0625	23.6	24.1	24.6	24.2	18.2
7.06944	23.2	24.1	24.6	24.2	17.9
7.07639	23	24.2	24.6	24.2	17.2
7.08333	22.7	24.2	24.6	24.2	17.3
7.09028	22.5	24.2	24.6	24.2	17.2
7.09722	22.3	24.2	24.6	24.2	16.2
7.10417	22	24.2	24.5	24.1	15.9
7.11111	21.8	24.2	24.5	24.1	15.5
7.11806	21.5	24.2	24.5	24.1	15.1
7.125	21.3	24.2	24.5	24.1	14.9
7.13194	21	24.2	24.5	24.1	14.9
7.13889	20.8	24.3	24.5	24.1	14.7
7.14583	20.6	24.3	24.5	24.1	14.6
7.15278	20.4	24.3	24.5	24.1	14.2
7.15972	20.2	24.3	24.5	24.1	14
7.16667	20.1	24.3	24.5	24.1	13.8
7.17361	19.9	24.3	24.5	24.1	12.8
7.18056	19.7	24.3	24.5	24.1	13.2
7.1875	19.5	24.3	24.5	24.1	13.1
7.19444	19.4	24.3	24.5	24.1	12.9
7.20139	19.2	24.3	24.5	24.1	12.4
7.20833	19.1	24.3	24.4	24.1	11.6
7.21528	18.9	24.3	24.4	24.1	11.1
7.22222	18.7	24.2	24.4	24.1	11.2
7.22917	18.5	24.2	24.3	24.1	11.1
7.23611	18.4	24.2	24.3	24.1	10.7
7.24306	18.2	24.2	24.3	24.1	10.3
7.25	18	24.2	24.3	24.1	9.9
7.25694	17.9	24.2	24.3	24.1	9.6
7.26389	17.7	24.2	24.3	24.1	9.5
7.27083	17.5	24.2	24.3	24.1	9.2
7.27778	17.3	24.2	24.3	24.1	9.3
7.28472	17.1	24.1	24.3	24.1	9.2
7.29167	17.1	24.1	24.3	24	8.9
7.29861	16.9	24.1	24.3	24	8.7
7.30556	16.7	24.1	24.3	24	8.7
7.3125	16.6	24.1	24.3	24	8.5
7.31944	16.4	24.1	24.3	24	8.2
7.32639	16.3	24	24.3	24	7.9
7.33333	16.2	24	24.3	24	7.9
7.34028	16	24	24.3	24	7.8
7.34722	15.9	24	24.3	24	7.7
7.35417	15.8	24	24.3	24	7.7
7.36111	15.7	23.8	24.3	24	7.7
7.36806	15.6	23.8	24.2	24	7.5
7.375	15.5	23.8	24.2	23.9	7.6
7.38194	15.4	23.8	24.2	23.8	7.2
7.38889	15.2	23.8	24.2	23.8	7.1
7.39583	15.1	23.7	24.2	23.8	7
7.40278	15	23.7	24.2	23.8	6.9
7.40972	15	23.7	24.2	23.8	6.7
7.41667	14.8	23.6	24.2	23.8	6
7.42361	14.7	23.6	24.2	23.8	6
7.43056	14.7	23.6	24.2	23.8	5.8
7.4375	14.6	23.6	24.2	23.8	5.7
7.44444	14.5	23.5	24.2	23.7	5.7
7.45139	14.4	23.5	24.2	23.7	5.6
7.45833	14.3	23.5	24.1	23.7	5.7
7.46528	14.2	23.3	24.1	23.7	5.7
7.47222	14.1	23.3	24.1	23.7	5.6
7.47917	14	23.3	24.1	23.7	5.6
7.48611	14	23.2	24.1	23.7	5.5
7.49306	13.9	23.2	24.1	23.6	5.5
7.5	13.7	23.2	24.1	23.6	5.8
7.50694	13.7	23.1	24.1	23.6	6.1
7.51389	13.7	23.1	24	23.6	5.8
7.52083	13.6	23.1	24	23.6	5.7
7.52778	13.5	23	24	23.6	6
7.53472	13.5	23	24	23.5	6.1
7.54167	13.5	23	24	23.5	6.4
7.54861	13.5	22.9	24	23.5	6.9
7.55556	13.5	22.9	24	23.5	7.2
7.5625	13.6	22.9	24	23.5	7.5
7.56944	13.7	22.7	23.9	23.4	7.6
7.57639	13.8	22.7	23.8	23.3	7.4
7.58333	13.9	22.7	23.8	23.3	8.4
7.59028	14	22.6	23.8	23.3	9.2
7.59722	14.2	22.6	23.8	23.3	9.6
7.60417	14.4	22.5	23.8	23.3	10.2
7.61111	14.7	22.5	23.8	23.2	11
7.61806	14.9	22.5	23.7	23.2	11.4
7.625	15.1	22.4	23.7	23.2	14.8
7.63194	15.6	22.4	23.7	23.2	18.1
7.63889	16.3	22.4	23.7	23.2	20.2
7.64583	17	22.3	23.7	23.1	19.2
7.65278	17.4	22.3	23.7	23.1	19
7.65972	18	22.3	23.7	23.1	22.5
7.66667	18.5	22.2	23.6	23.1	23.1
7.67361	19.1	22.2	23.6	23	23
7.68056	19.7	22.2	23.6	23	23.2
7.6875	20.1	22.1	23.6	23	22.4
7.69444	20.4	22	23.6	23	21.6
7.70139	20.7	22	23.5	23	22.9
7.70833	21.2	22	23.5	22.9	24.6
7.71528	21.6	21.9	23.5	22.9	23.4
7.72222	22	21.9	23.5	22.9	25.9
7.72917	22.4	21.9	23.5	22.9	26.4
7.73611	23	21.9	23.4	22.8	26.9
7.74306	23.7	21.8	23.3	22.7	29.9
7.75	24.5	21.8	23.3	22.7	27.8
7.75694	25.1	21.8	23.3	22.7	28.9
7.76389	25.9	21.8	23.3	22.7	31.3
7.77083	27.1	21.8	23.3	22.6	30.4
7.77778	28.1	21.8	23.2	22.6	29.2
7.78472	28.7	21.8	23.2	22.6	26.9
7.79167	28.9	21.7	23.2	22.6	25.8
7.79861	28.5	21.7	23.2	22.5	27.7
7.80556	28.6	21.7	23.1	22.5	28.8
7.8125	29.1	21.7	23.1	22.5	29.1
7.81944	29.2	21.7	23.1	22.5	23.5
7.82639	28.4	21.7	23.1	22.4	22.3
7.83333	27.5	21.7	23	22.4	24.3
7.84028	27.1	21.7	23	22.4	22.8
7.84722	26.6	21.7	23	22.4	22
7.85417	25.9	21.7	23	22.3	21.3
7.86111	25.3	21.7	22.9	22.3	20.6
7.86806	24.6	21.7	22.9	22.3	20.5
7.875	24.3	21.7	22.9	22.3	20.4
7.88194	24.1	21.8	22.9	22.2	19
7.88889	23.6	21.8	22.8	22.2	19.4
7.89583	23.3	21.8	22.7	22.2	19.3
7.90278	23.2	21.8	22.7	22.2	19.1
7.90972	23	21.8	22.7	22.2	19.3
7.91667	22.9	21.8	22.7	22.1	18.7
7.92361	22.7	21.8	22.7	22	19
7.93056	22.5	21.8	22.6	22	19.3
7.9375	22.5	21.8	22.6	22	20.3
7.94444	22.5	21.9	22.6	22	19.1
7.95139	22.3	21.9	22.6	22	18.7
7.95833	22	21.9	22.6	22	18.8
7.96528	21.9	21.9	22.6	22	19
7.97222	21.8	21.9	22.5	22	18.9
7.97917	21.7	21.9	22.5	22	19.5
7.98611	21.7	21.9	22.5	21.9	19.3
7.99306	21.8	21.9	22.5	21.9	18.7
8	21.7	21.9	22.5	21.9	18.5
8.00694	21.6	21.9	22.5	21.9	18.1
8.01389	21.5	22	22.5	21.9	18
8.02083	21.3	22	22.4	21.9	17.8
8.02778	21.2	22	22.4	21.9	17.8
8.03472	20.9	22	22.4	21.9	17.4
8.04167	20.8	22	22.4	21.9	17
8.04861	20.7	22	22.4	21.9	16.6
8.05556	20.5	22	22.4	21.9	16.2
8.0625	20.3	22	22.4	21.9	15.5
8.06944	20.1	22	22.4	21.9	15.3
8.07639	19.9	22	22.4	21.9	16.5
8.08333	19.7	22	22.4	21.9	16.5
8.09028	19.6	22	22.3	21.9	16.3
8.09722	19.4	22	22.3	21.9	16.3
8.10417	19.3	22	22.3	21.9	16
8.11111	19.2	22	22.3	21.9	15.8
8.11806	19.1	22	22.3	21.9	15.7
8.125	18.9	22	22.3	21.8	15.5
8.13194	18.8	22	22.3	21.8	15.4
8.13889	18.7	22	22.3	21.8	15.2
8.14583	18.6	22	22.3	21.8	15.2
8.15278	18.5	22	22.3	21.8	14.9
8.15972	18.4	22	22.3	21.8	15
8.16667	18.3	22	22.3	21.8	14.8
8.17361	18.2	22	22.3	21.8	14.6
8.18056	18.1	22	22.3	21.8	14.5
8.1875	18	22	22.2	21.8	14.4
8.19444	18	22	22.2	21.8	14.2
8.20139	17.9	22	22.2	21.8	14.1
8.20833	17.8	22	22.2	21.8	14
8.21528	17.8	22	22.2	21.8	13.8
8.22222	17.7	21.9	22.2	21.8	13.6
8.22917	17.6	21.9	22.2	21.8	13.5
8.23611	17.5	21.9	22.2	21.8	13.2
8.24306	17.4	21.9	22.2	21.8	12.8
8.25	17.3	21.9	22.2	21.8	12.3
8.25694	17.2	21.9	22.2	21.8	11.9
8.26389	17.1	21.9	22.2	21.8	11.8
8.27083	17	21.9	22.2	21.8	11.5
8.27778	16.9	21.9	22.2	21.7	11.5
8.28472	16.8	21.8	22.2	21.7	11.2
8.29167	16.7	21.8	22.2	21.7	10.9
8.29861	16.5	21.8	22.2	21.7	10.6
8.30556	16.4	21.8	22.1	21.7	10.4
8.3125	16.3	21.8	22.1	21.7	10.4
8.31944	16.1	21.8	22	21.7	10.2
8.32639	16	21.7	22	21.7	10
8.33333	15.9	21.7	22	21.7	9.9
8.34028	15.9	21.7	22	21.7	9.9
8.34722	15.8	21.7	22	21.7	9.8
8.35417	15.7	21.7	22	21.7	9.6
8.36111	15.6	21.6	22	21.6	9.6
8.36806	15.5	21.6	22	21.6	9.4
8.375	15.5	21.6	22	21.6	9.4
8.38194	15.4	21.6	22	21.6	9.2
8.38889	15.3	21.6	22	21.6	9
8.39583	15.2	21.5	22	21.6	8.9
8.40278	15.2	21.5	22	21.6	8.9
8.40972	15.1	21.5	21.9	21.6	8.8
8.41667	15	21.5	21.9	21.5	8.8
8.42361	15	21.4	21.9	21.5	8.7
8.43056	14.9	21.4	21.9	21.5	8.7
8.4375	14.9	21.4	21.9	21.5	8.7
8.44444	14.8	21.4	21.9	21.5	8.5
8.45139	14.7	21.4	21.9	21.5	8.5
8.45833	14.6	21.3	21.9	21.5	8.1
8.46528	14.5	21.3	21.9	21.5	7.9
8.47222	14.4	21.3	21.9	21.4	7.7
8.47917	14.4	21.2	21.8	21.4	7.7
8.48611	14.3	21.2	21.8	21.4	7.8
8.49306	14.2	21.2	21.8	21.4	7.8
8.5	14.1	21.2	21.8	21.4	7.6
8.50694	14	21	21.8	21.4	7.4
8.51389	13.9	21	21.8	21.4	7.4
8.52083	13.8	21	21.8	21.3	7.3
8.52778	13.7	21	21.8	21.3	7.5
8.53472	13.7	20.9	21.7	21.3	7.4
8.54167	13.7	20.9	21.7	21.3	7.2
8.54861	13.6	20.9	21.7	21.3	7.3
8.55556	13.5	20.8	21.7	21.3	7.1
8.5625	13.5	20.8	21.7	21.2	7
8.56944	13.5	20.8	21.7	21.2	7
8.57639	13.5	20.7	21.7	21.2	7
8.58333	13.5	20.7	21.6	21.2	7.1
8.59028	13.6	20.7	21.6	21.2	7.3
8.59722	13.6	20.7	21.6	21.1	7.6
8.60417	13.7	20.6	21.6	21	8.1
8.61111	13.8	20.6	21.6	21	9.3
8.61806	14	20.6	21.6	21	10.5
8.625	14.2	20.5	21.5	21	12.6
8.63194	14.6	20.5	21.5	21	16.5
8.63889	15.1	20.5	21.5	21	17.9
8.64583	15.7	20.4	21.5	20.9	18.3
8.65278	16.2	20.4	21.5	20.9	21.1
8.65972	16.9	20.4	21.5	20.9	22.7
8.66667	17.6	20.4	21.5	20.9	23.8
8.67361	18.2	20.3	21.5	20.9	23.8
8.68056	18.7	20.3	21.4	20.9	22.9
8.6875	19.2	20.3	21.4	20.8	24.8
8.69444	19.7	20.3	21.4	20.8	27.2
8.70139	20.4	20.2	21.4	20.8	25.4
8.70833	21	20.2	21.4	20.8	26.7
8.71528	21.6	20.2	21.4	20.8	26.8
8.72222	22.3	20.2	21.3	20.7	27.8
8.72917	22.9	20.1	21.3	20.7	26.3
8.73611	23.3	20.1	21.3	20.7	26.7
8.74306	23.7	20.1	21.3	20.7	28.4
8.75	24.2	20.1	21.3	20.7	29.2
8.75694	24.9	20.1	21.2	20.6	29.9
8.76389	25.5	20.1	21.2	20.6	26.1
8.77083	25.8	20.1	21.2	20.6	28
8.77778	26.2	20.1	21.2	20.6	28.6
8.78472	26.7	20	21.2	20.5	27.6
8.79167	27.1	20	21.2	20.5	26.6
8.79861	27.2	20	21	20.5	28.9
8.80556	27.5	20	21	20.5	29.9
8.8125	28.3	20	21	20.5	28.9
8.81944	28.9	20	21	20.4	30.1
8.82639	29.4	20.1	21	20.4	30
8.83333	29.9	20.1	20.9	20.4	32.1
8.84028	30.4	20.1	20.9	20.4	30
8.84722	30.2	20.1	20.9	20.4	26
8.85417	29.6	20.1	20.9	20.4	26.5
8.86111	28.9	20.1	20.9	20.3	26.9
8.86806	28.7	20.1	20.8	20.3	30.8
8.875	29.4	20.1	20.8	20.3	30.8
8.88194	29.9	20.2	20.8	20.3	28.3
8.88889	29.7	20.2	20.8	20.3	26.9
8.89583	29.4	20.2	20.8	20.3	25.5
8.90278	28.7	20.2	20.8	20.2	24.8
8.90972	28	20.3	20.7	20.2	24.2
8.91667	27.4	20.3	20.7	20.2	22.2
8.92361	26.6	20.3	20.7	20.2	20.6
8.93056	25.5	20.3	20.7	20.2	19.2
8.9375	24.5	20.4	20.7	20.2	19
8.94444	23.7	20.4	20.7	20.2	18.9
8.95139	23.1	20.4	20.6	20.2	18.8
8.95833	22.7	20.4	20.6	20.2	18.5
8.96528	22.4	20.5	20.6	20.2	18.5
8.97222	22	20.5	20.6	20.1	17.8
8.97917	21.7	20.5	20.6	20.1	16.2
8.98611	20.9	20.5	20.6	20.1	13.9
8.99306	20.1	20.6	20.6	20.1	13.5
9	19.5	20.6	20.6	20.1	13.3
9.00694	19.1	20.6	20.5	20.1	14
9.01389	18.9	20.6	20.5	20.1	14.1
9.02083	18.9	20.7	20.5	20.1	14.2
9.02778	18.8	20.7	20.5	20.1	14.5
9.03472	18.8	20.7	20.5	20.1	14.5
9.04167	18.8	20.7	20.5	20.1	14.3
9.04861	18.7	20.7	20.5	20.1	11.9
9.05556	18.5	20.7	20.5	20.1	10.7
9.0625	18.1	20.7	20.5	20.1	10.1
9.06944	17.8	20.8	20.5	20.1	11.4
9.07639	17.5	20.8	20.5	20.1	12.1
9.08333	17.4	20.8	20.5	20.2	12
9.09028	17.3	20.8	20.5	20.2	12.1
9.09722	17.3	20.8	20.5	20.2	12
9.10417	17.3	20.8	20.5	20.2	12
9.11111	17.2	20.8	20.5	20.2	11.7
9.11806	17.1	20.8	20.5	20.2	11.7
9.125	17.1	20.8	20.5	20.2	11.5
9.13194	17	20.8	20.5	20.2	11.3
9.13889	16.9	20.8	20.5	20.2	11.2
9.14583	16.8	20.8	20.5	20.2	11.2
9.15278	16.7	20.8	20.5	20.2	11.2
9.15972	16.6	20.8	20.5	20.2	11.2
9.16667	16.5	20.8	20.5	20.2	11.1
9.17361	16.4	20.8	20.5	20.2	11
9.18056	16.4	20.8	20.5	20.2	10.8
9.1875	16.3	20.8	20.5	20.2	10.7
9.19444	16.3	20.8	20.5	20.2	10.8
9.20139	16.2	20.8	20.5	20.2	10.7
9.20833	16.2	20.8	20.5	20.2	10.7
9.21528	16.1	20.7	20.5	20.2	10.8
9.22222	16.1	20.7	20.5	20.2	10.7
9.22917	16.1	20.7	20.5	20.2	10.7
9.23611	16	20.7	20.5	20.2	10.6
9.24306	15.9	20.7	20.5	20.2	10.6
9.25	15.9	20.7	20.5	20.2	10.4
9.25694	15.9	20.7	20.5	20.2	10.4
9.26389	15.8	20.7	20.5	20.2	10.4
9.27083	15.8	20.6	20.5	20.2	10.4
9.27778	15.7	20.6	20.5	20.2	10.4
9.28472	15.7	20.6	20.5	20.2	10.2
9.29167	15.6	20.6	20.5	20.2	9.9
9.29861	15.6	20.6	20.5	20.2	10
9.30556	15.5	20.6	20.5	20.2	10
9.3125	15.5	20.5	20.5	20.2	9.9
9.31944	15.5	20.5	20.5	20.2	9.9
9.32639	15.4	20.5	20.5	20.2	9.9
9.33333	15.4	20.5	20.5	20.2	9.9
9.34028	15.3	20.5	20.5	20.2	9.8
9.34722	15.3	20.4	20.5	20.2	9.8
9.35417	15.2	20.4	20.5	20.2	9.7
9.36111	15.1	20.4	20.5	20.2	9.7
9.36806	15.1	20.4	20.5	20.2	9.7
9.375	15	20.4	20.5	20.1	9.7
9.38194	15	20.3	20.5	20.1	9.5
9.38889	15	20.3	20.5	20.1	9.5
9.39583	14.9	20.3	20.5	20.1	9.3
9.40278	14.9	20.3	20.5	20.1	9.3
9.40972	14.8	20.3	20.5	20.1	9.4
9.41667	14.8	20.2	20.4	20.1	9.4
9.42361	14.7	20.2	20.4	20.1	9.5
9.43056	14.7	20.2	20.4	20.1	9.3
9.4375	14.7	20.2	20.4	20.1	9.4
9.44444	14.7	20.1	20.4	20.1	9.3
9.45139	14.7	20.1	20.4	20	9.5
9.45833	14.6	20.1	20.4	20	9.5
9.46528	14.6	20.1	20.4	20	9.6
9.47222	14.6	20	20.4	20	9.5
9.47917	14.6	20	20.4	20	9.4
9.48611	14.5	20	20.4	20	9.4
9.49306	14.5	20	20.4	20	9.5
9.5	14.4	19.9	20.4	20	9.4
9.50694	14.4	19.9	20.3	19.9	9.3
9.51389	14.4	19.9	20.3	19.9	9.3
9.52083	14.4	19.9	20.3	19.9	9.4
9.52778	14.4	19.8	20.3	19.9	9.5
9.53472	14.3	19.8	20.3	19.9	9.6
9.54167	14.3	19.8	20.3	19.9	9.7
9.54861	14.3	19.8	20.3	19.9	9.9
9.55556	14.4	19.7	20.3	19.8	10.1
9.5625	14.4	19.7	20.3	19.8	10.4
9.56944	14.4	19.7	20.2	19.8	10.6
9.57639	14.5	19.7	20.2	19.8	10.8
9.58333	14.6	19.6	20.2	19.8	11
9.59028	14.6	19.6	20.2	19.8	11.3
9.59722	14.7	19.6	20.2	19.7	11.5
9.60417	14.8	19.5	20.2	19.7	12
9.61111	15	19.5	20.2	19.7	12.5
9.61806	15.1	19.5	20.2	19.7	13
9.625	15.4	19.5	20.1	19.7	13.6
9.63194	15.6	19.5	20.1	19.7	14.2
9.63889	15.9	19.4	20.1	19.7	14.7
9.64583	16	19.4	20.1	19.6	15
9.65278	16.3	19.4	20.1	19.6	15.7
9.65972	16.5	19.4	20.1	19.6	16.3
9.66667	16.8	19.3	20.1	19.6	17
9.67361	17.1	19.3	20	19.6	17.9
9.68056	17.5	19.3	20	19.6	19.4
9.6875	17.9	19.3	20	19.5	19.8
9.69444	18.2	19.2	20	19.5	19.5
9.70139	18.5	19.2	20	19.5	19.6
9.70833	18.8	19.2	20	19.5	18.9
9.71528	19	19.2	20	19.5	19.4
9.72222	19.2	19.2	19.9	19.4	21.5
9.72917	19.5	19.2	19.9	19.4	21.6
9.73611	19.8	19.1	19.9	19.4	21.7
9.74306	20.1	19.1	19.9	19.4	22.8
9.75	20.5	19.1	19.9	19.4	25
9.75694	21	19.1	19.9	19.4	25.7
9.76389	21.7	19.1	19.9	19.4	26.1
9.77083	22.3	19.1	19.8	19.3	25.8
9.77778	22.7	19.1	19.8	19.3	26.8
9.78472	23.2	19.1	19.8	19.3	26.1
9.79167	23.5	19.1	19.8	19.3	27.4
9.79861	24.1	19.1	19.8	19.3	28.2
9.80556	24.9	19	19.8	19.2	28
9.8125	25.7	19	19.7	19.2	27.1
9.81944	26.1	19	19.7	19.2	24.4
9.82639	26	19	19.7	19.2	25.9
9.83333	26.4	19.1	19.7	19.2	27.9
9.84028	27.1	19.1	19.7	19.2	27.4
9.84722	27.4	19.1	19.7	19.1	26.3
9.85417	27.7	19.1	19.7	19.1	26.1
9.86111	27.8	19.1	19.6	19.1	26.7
9.86806	28.1	19.1	19.6	19.1	28
9.875	28.3	19.1	19.6	19.1	27.4
9.88194	28.4	19.1	19.6	19.1	28
9.88889	28.6	19.1	19.6	19.1	28.1
9.89583	28.7	19.2	19.6	19	24.7
9.90278	28.3	19.2	19.5	19	24.4
9.90972	27.5	19.2	19.5	19	23.3
9.91667	26.9	19.2	19.5	19	23.5
9.92361	26.5	19.2	19.5	19	25.3
9.93056	26.6	19.3	19.5	19	27.3
9.9375	26.8	19.3	19.5	19	27.7
9.94444	26.9	19.3	19.5	19	26.9
9.95139	26.9	19.4	19.5	19	27.3
9.95833	27.1	19.4	19.4	19	26.8
9.96528	26.9	19.4	19.4	19	25.6
9.97222	26.8	19.4	19.4	19	26.8
9.97917	26.8	19.5	19.4	18.9	26.7
9.98611	26.5	19.5	19.4	18.9	26.6
9.99306	26.3	19.5	19.4	18.9	25.1
10	25.8	19.6	19.4	18.9	22.4
10.0069	25.3	19.6	19.4	18.9	20.9
10.0139	24.5	19.6	19.4	18.9	20.4
10.0208	23.8	19.7	19.4	18.9	20.2
10.0278	23.2	19.7	19.4	18.9	19.7
10.0347	22.6	19.7	19.4	18.9	19.4
10.0417	22.2	19.7	19.4	18.9	19.3
10.0486	21.8	19.8	19.3	18.9	19.1
10.0556	21.5	19.8	19.3	18.9	19
10.0625	21.3	19.8	19.3	18.9	18.9
10.0694	21	19.9	19.3	18.9	18.6
10.0764	20.9	19.9	19.3	18.9	18.2
10.0833	20.7	19.9	19.3	18.9	18
10.0903	20.5	19.9	19.3	18.9	17.8
10.0972	20.3	19.9	19.3	19	17.6
10.1042	20.1	20	19.3	19	17.6
10.1111	20	20	19.3	19	17.6
10.1181	19.8	20	19.3	19	16.6
10.125	19.6	20	19.3	19	15.4
10.1319	19.4	20	19.3	19	15.3
10.1389	19.2	20.1	19.4	19	14.4
10.1458	18.9	20.1	19.4	19	11.6
10.1528	18.4	20.1	19.4	19	10.9
10.1597	17.9	20.1	19.4	19	10.6
10.1667	17.5	20.1	19.4	19	10.7
10.1736	17.2	20.1	19.4	19	11.2
10.1806	17	20.1	19.4	19	11
10.1875	16.8	20.1	19.4	19	10.8
10.1944	16.7	20.1	19.4	19	11.3
10.2014	16.5	20.1	19.4	19	11.7
10.2083	16.4	20.1	19.4	19	11.8
10.2153	16.4	20.1	19.4	19	11.6
10.2222	16.4	20.1	19.4	19	11.5
10.2292	16.3	20.1	19.4	19.1	11.6
10.2361	16.3	20.1	19.4	19.1	11.5
10.2431	16.4	20.1	19.4	19.1	11.5
10.25	16.4	20.1	19.4	19.1	11.5
10.2569	16.4	20.1	19.5	19.1	11.4
10.2639	16.4	20.1	19.5	19.1	11.6
10.2708	16.4	20.1	19.5	19.1	11.8
10.2778	16.4	20.1	19.5	19.1	11.9
10.2847	16.4	20.1	19.5	19.1	11.8
10.2917	16.3	20.1	19.5	19.1	11.8
10.2986	16.3	20.1	19.5	19.1	11.8
10.3056	16.2	20.1	19.5	19.1	11.7
10.3125	16.2	20.1	19.5	19.1	11.7
10.3194	16.1	20.1	19.5	19.1	11.8
10.3264	16.1	20.1	19.5	19.1	11.9
10.3333	16	20.1	19.5	19.2	11.9
10.3403	16	20	19.5	19.1	11.8
10.3472	15.9	20	19.5	19.2	11.7
10.3542	15.9	20	19.5	19.2	11.6
10.3611	15.9	20	19.6	19.2	11.4
10.3681	15.8	20	19.6	19.2	11.3
10.375	15.7	20	19.6	19.2	11.3
10.3819	15.7	20	19.6	19.1	11.3
10.3889	15.6	19.9	19.6	19.1	11.3
10.3958	15.6	19.9	19.6	19.1	11.2
10.4028	15.5	19.9	19.6	19.1	11.2
10.4097	15.5	19.9	19.6	19.1	11.1
10.4167	15.5	19.9	19.6	19.1	11.1
10.4236	15.5	19.9	19.6	19.1	11.1
10.4306	15.5	19.8	19.6	19.1	11.1
10.4375	15.4	19.8	19.6	19.1	11.1
10.4444	15.4	19.8	19.6	19.1	11.2
10.4514	15.3	19.8	19.6	19.1	11
10.4583	15.3	19.8	19.6	19.1	11
10.4653	15.2	19.8	19.6	19.1	11
10.4722	15.2	19.7	19.6	19.1	11
10.4792	15.1	19.7	19.6	19.1	10.9
10.4861	15.1	19.7	19.6	19.1	10.9
10.4931	15	19.7	19.6	19	10.8
10.5	15	19.7	19.6	19.1	10.9
10.5069	15	19.6	19.6	19	10.9
10.5139	15	19.6	19.6	19	10.9
10.5208	14.9	19.6	19.6	19.1	10.9
10.5278	14.9	19.6	19.6	19.1	10.9
10.5347	14.9	19.6	19.6	19	10.9
10.5417	14.9	19.6	19.6	19	11.1
10.5486	14.9	19.5	19.6	19	11.2
10.5556	14.9	19.5	19.6	19	11.3
10.5625	15	19.5	19.6	19	11.5
10.5694	15	19.5	19.6	19	11.7
10.5764	15	19.4	19.6	19	11.9
10.5833	15.1	19.4	19.6	19	12.1
10.5903	15.2	19.4	19.5	19	12.5
10.5972	15.3	19.4	19.5	19	12.8
10.6042	15.5	19.4	19.5	18.9	13.1
10.6111	15.6	19.3	19.5	18.9	13.5
10.6181	15.8	19.3	19.5	18.9	14.1
10.625	15.9	19.3	19.5	18.9	15
10.6319	16.2	19.3	19.5	18.9	15.8
10.6389	16.5	19.3	19.5	18.8	16.7
10.6458	16.8	19.2	19.5	18.8	17.4
10.6528	17.1	19.2	19.5	18.8	18
10.6597	17.4	19.2	19.5	18.8	18.5
10.6667	17.8	19.2	19.5	18.8	19.1
10.6736	18	19.2	19.5	18.8	20.8
10.6806	18.5	19.2	19.5	18.8	22.5
10.6875	19	19.1	19.5	18.8	23.3
10.6944	19.6	19.1	19.5	18.8	22.6
10.7014	19.9	19.1	19.5	18.8	22.5
10.7083	20.2	19.1	19.5	18.7	23
10.7153	20.5	19.1	19.4	18.7	24.5
10.7222	20.9	19.1	19.4	18.7	25.3
10.7292	21.3	19.1	19.4	18.7	24.5
10.7361	21.6	19.1	19.4	18.7	24.1
10.7431	21.7	19.1	19.4	18.7	23
10.75	21.6	19	19.4	18.7	22.5
10.7569	21.6	19	19.4	18.6	22.6
10.7639	21.6	19	19.4	18.7	23.4
10.7708	21.7	19	19.4	18.6	24.7
10.7778	21.9	19	19.4	18.6	25.7
10.7847	22.3	19	19.4	18.6	26.9
10.7917	22.9	19	19.3	18.6	29.8
10.7986	23.8	19	19.3	18.6	28.7
10.8056	24.5	19	19.3	18.6	27.4
10.8125	25.1	19	19.3	18.6	28.9
10.8194	25.7	19	19.3	18.6	27.2
10.8264	25.9	19	19.3	18.6	27.2
10.8333	26.2	19	19.3	18.6	26.1
10.8403	26.3	19	19.3	18.5	26.5
10.8472	26.4	19.1	19.3	18.5	25.9
10.8542	26.2	19.1	19.3	18.5	28.3
10.8611	26.9	19.1	19.2	18.5	29.5
10.8681	27.8	19.1	19.2	18.5	29.7
10.875	28.4	19.1	19.2	18.5	28.7
10.8819	28.8	19.1	19.2	18.5	28.4
10.8889	29.2	19.1	19.2	18.5	28.4
10.8958	29.3	19.2	19.2	18.5	28.3
10.9028	29.4	19.2	19.2	18.5	28.3
10.9097	29.4	19.2	19.2	18.5	29.4
10.9167	29.6	19.2	19.2	18.5	29.9
10.9236	29.7	19.3	19.2	18.5	28.9
10.9306	29.7	19.3	19.2	18.5	29.2
10.9375	29.7	19.3	19.2	18.5	27.9
10.9444	29.2	19.4	19.2	18.5	27.8
10.9514	28.7	19.4	19.2	18.5	27.8
10.9583	28.4	19.4	19.1	18.5	26.9
10.9653	28.1	19.4	19.1	18.5	27.5
10.9722	27.7	19.5	19.1	18.5	23.8
10.9792	27.1	19.5	19.1	18.5	23.5
10.9861	26.4	19.5	19.1	18.5	23.4
10.9931	25.8	19.6	19.1	18.5	23
11	25.3	19.6	19.1	18.5	21.3
11.0069	24.6	19.6	19.1	18.5	18.6
11.0139	23.6	19.7	19.1	18.5	13.8
11.0208	22.5	19.7	19.1	18.5	16.8
11.0278	21.8	19.7	19.1	18.5	17.3
11.0347	21.4	19.8	19.1	18.5	17.4
11.0417	21.2	19.8	19.1	18.5	16.7
11.0486	20.9	19.8	19.1	18.5	15.7
11.0556	20.6	19.8	19.1	18.5	12.9
11.0625	20.2	19.9	19.1	18.5	12.3
11.0694	19.7	19.9	19.1	18.5	14.5
11.0764	19.4	19.9	19.1	18.5	14.2
11.0833	19.1	19.9	19.1	18.5	14.1
11.0903	18.9	20	19.1	18.5	14
11.0972	18.8	20	19.1	18.5	14.1
11.1042	18.7	20	19.1	18.5	14.1
11.1111	18.6	20	19.1	18.6	14.2
11.1181	18.5	20	19.1	18.6	14.4
11.125	18.5	20.1	19.1	18.6	14.4
11.1319	18.4	20.1	19.2	18.6	14.4
11.1389	18.4	20.1	19.2	18.6	14.4
11.1458	18.3	20.1	19.2	18.6	14.4
11.1528	18.3	20.1	19.2	18.6	14
11.1597	18.2	20.1	19.2	18.6	13.8
11.1667	18.1	20.1	19.2	18.6	13.8
11.1736	18	20.1	19.2	18.7	13.7
11.1806	18	20.1	19.2	18.7	13.7
11.1875	18	20.1	19.2	18.7	13.7
11.1944	17.9	20.2	19.2	18.7	13.8
11.2014	17.8	20.2	19.2	18.7	13.8
11.2083	17.7	20.2	19.3	18.7	13.7
11.2153	17.7	20.2	19.3	18.7	13.7
11.2222	17.6	20.2	19.3	18.7	13.6
11.2292	17.5	20.2	19.3	18.7	13.6
11.2361	17.5	20.2	19.3	18.7	13
11.2431	17.4	20.2	19.3	18.7	12.9
11.25	17.3	20.2	19.3	18.8	13
11.2569	17.2	20.2	19.3	18.8	13.1
11.2639	17.1	20.2	19.3	18.8	13
11.2708	17.1	20.1	19.3	18.8	12.9
11.2778	17.1	20.1	19.4	18.8	12.7
11.2847	17.1	20.1	19.4	18.8	12.7
11.2917	17	20.1	19.4	18.8	12.7
11.2986	17	20.1	19.4	18.8	12.7
11.3056	16.9	20.1	19.4	18.8	12.7
11.3125	16.9	20.1	19.4	18.8	12.6
11.3194	16.8	20.1	19.4	18.8	12.5
11.3264	16.7	20.1	19.4	18.8	12.4
11.3333	16.7	20.1	19.4	18.8	12.3
11.3403	16.6	20.1	19.4	18.8	12.3
11.3472	16.5	20.1	19.4	18.8	12.2
11.3542	16.4	20.1	19.5	18.8	12
11.3611	16.4	20	19.5	18.8	11.8
11.3681	16.3	20	19.5	18.8	11.5
11.375	16.2	20	19.5	18.8	11.5
11.3819	16.1	20	19.5	18.8	11.5
11.3889	16	20	19.5	18.8	11.5
11.3958	15.9	20	19.5	18.8	11.5
11.4028	15.9	20	19.5	18.8	11.4
11.4097	15.9	20	19.5	18.8	11.4
11.4167	15.9	19.9	19.5	18.8	11.3
11.4236	15.8	19.9	19.5	18.8	11.1
11.4306	15.7	19.9	19.5	18.8	11.2
11.4375	15.7	19.9	19.5	18.8	11.3
11.4444	15.6	19.9	19.5	18.8	11.3
11.4514	15.6	19.9	19.5	18.8	11.2
11.4583	15.5	19.9	19.5	18.8	11.1
11.4653	15.5	19.8	19.5	18.8	10.8
11.4722	15.5	19.8	19.5	18.8	10.5
11.4792	15.4	19.8	19.5	18.8	10.3
11.4861	15.3	19.8	19.5	18.8	10.4
11.4931	15.2	19.8	19.5	18.8	10.2
11.5	15.1	19.8	19.5	18.8	10.2
11.5069	15	19.7	19.5	18.8	10.2
11.5139	15	19.7	19.5	18.8	10.2
11.5208	15	19.7	19.5	18.8	10.4
11.5278	14.9	19.7	19.5	18.8	10.6
11.5347	14.9	19.7	19.5	18.8	10.4
11.5417	14.9	19.6	19.5	18.8	10.5
11.5486	14.9	19.6	19.5	18.8	10.7
11.5556	14.9	19.6	19.5	18.8	11
11.5625	14.9	19.6	19.5	18.8	11.3
11.5694	15	19.6	19.5	18.8	11.2
11.5764	15	19.5	19.5	18.8	11.3
11.5833	15	19.5	19.5	18.8	11.3
11.5903	15	19.5	19.5	18.8	11.5
11.5972	15.1	19.5	19.5	18.8	12.1
11.6042	15.2	19.5	19.5	18.8	12.7
11.6111	15.3	19.4	19.5	18.7	13.5
11.6181	15.5	19.4	19.5	18.7	14
11.625	15.7	19.4	19.5	18.7	14.9
11.6319	15.9	19.4	19.5	18.7	15.5
11.6389	16.2	19.4	19.5	18.7	15.9
11.6458	16.4	19.3	19.5	18.7	16
11.6528	16.7	19.3	19.5	18.7	16.2
11.6597	16.8	19.3	19.5	18.7	16.4
11.6667	17	19.3	19.5	18.7	16.6
11.6736	17.1	19.3	19.5	18.7	16.8
11.6806	17.4	19.3	19.5	18.7	17.6
11.6875	17.6	19.2	19.5	18.7	17.5
11.6944	17.8	19.2	19.5	18.7	18.9
11.7014	18	19.2	19.5	18.7	19.7
11.7083	18.3	19.2	19.5	18.6	21.4
11.7153	18.7	19.2	19.4	18.6	23.1
11.7222	19.4	19.2	19.4	18.6	26.5
11.7292	20.1	19.2	19.4	18.6	25.7
11.7361	20.9	19.1	19.4	18.6	26.5
11.7431	21.7	19.1	19.4	18.6	26.8
11.75	22.4	19.1	19.4	18.6	26.1
11.7569	23.1	19.1	19.4	18.6	26.4
11.7639	23.8	19.1	19.4	18.6	27.4
11.7708	24.6	19.1	19.4	18.6	27.4
11.7778	25.4	19.1	19.4	18.6	27.1
11.7847	26.1	19.1	19.4	18.6	26.1
11.7917	26.6	19.1	19.4	18.5	27.4
11.7986	27.1	19.1	19.4	18.5	27.1
11.8056	27.7	19.1	19.4	18.5	27.4
11.8125	28	19.1	19.3	18.5	26.9
11.8194	28.1	19.1	19.3	18.5	26.8
11.8264	28.4	19.1	19.3	18.5	26.3
11.8333	29.1	19.1	19.3	18.5	26.4
11.8403	29.4	19.1	19.3	18.5	30.7
11.8472	29.9	19.1	19.3	18.5	28.1
11.8542	30.1	19.2	19.3	18.5	25.7
11.8611	30.3	19.2	19.3	18.5	28.9
11.8681	30.6	19.2	19.3	18.5	26.1
11.875	30.4	19.2	19.3	18.4	28.3
11.8819	30.4	19.2	19.3	18.4	27.7
11.8889	30	19.3	19.3	18.4	24.6
11.8958	29.4	19.3	19.2	18.4	25.2
11.9028	29.1	19.3	19.2	18.4	26.4
11.9097	29.2	19.4	19.2	18.4	28.6
11.9167	29.2	19.4	19.2	18.4	27.5
11.9236	29.2	19.4	19.2	18.4	28.3
11.9306	29.6	19.5	19.2	18.4	27.7
11.9375	29.3	19.5	19.2	18.4	25.9
11.9444	28.9	19.5	19.2	18.4	27.8
11.9514	28.6	19.6	19.2	18.4	28
11.9583	28.3	19.6	19.2	18.4	26.1
11.9653	27.8	19.7	19.2	18.4	27.4
11.9722	27.5	19.7	19.2	18.4	29.4
11.9792	27.2	19.7	19.2	18.4	28.9
11.9861	26.9	19.8	19.2	18.4	28.4
11.9931	26.4	19.8	19.2	18.4	23.6
12	25.8	19.8	19.2	18.5	22.3
12.0069	25.3	19.9	19.2	18.5	21.9
12.0139	24.6	19.9	19.2	18.5	21.5
12.0208	24.1	19.9	19.2	18.5	20.9
12.0278	23.7	20	19.2	18.5	19.6
12.0347	23.2	20	19.2	18.5	19.6
12.0417	22.9	20.1	19.2	18.5	19.1
12.0486	22.6	20.1	19.2	18.5	18.9
12.0556	22.4	20.1	19.2	18.5	18.9
12.0625	22.2	20.2	19.2	18.5	18.6
12.0694	21.9	20.2	19.2	18.5	18.5
12.0764	21.7	20.2	19.2	18.6	18.2
12.0833	21.6	20.2	19.2	18.6	18.5
12.0903	21.4	20.3	19.2	18.6	18.6
12.0972	21.3	20.3	19.2	18.6	18.7
12.1042	21.2	20.3	19.2	18.6	18.5
12.1111	21	20.3	19.2	18.6	18.4
12.1181	20.9	20.4	19.3	18.7	18.3
12.125	20.7	20.4	19.3	18.7	18.1
12.1319	20.6	20.4	19.3	18.7	18
12.1389	20.4	20.4	19.3	18.7	17.8
12.1458	20.3	20.5	19.3	18.7	17.7
12.1528	20.2	20.5	19.3	18.7	17.5
12.1597	20.1	20.5	19.3	18.7	17.4
12.1667	20	20.5	19.3	18.8	17.2
12.1736	19.9	20.5	19.4	18.8	17.1
12.1806	19.8	20.5	19.4	18.8	17
12.1875	19.7	20.5	19.4	18.8	16.9
12.1944	19.6	20.6	19.4	18.8	16.8
12.2014	19.5	20.6	19.4	18.8	16.6
12.2083	19.4	20.6	19.4	18.9	16.3
12.2153	19.3	20.6	19.4	18.9	16.1
12.2222	19.2	20.6	19.4	18.9	15.9
12.2292	19.1	20.6	19.5	18.9	15.9
12.2361	19	20.6	19.5	18.9	15.8
12.2431	18.9	20.6	19.5	18.9	15.9
12.25	18.8	20.6	19.5	18.9	15.8
12.2569	18.7	20.6	19.5	18.9	15.6
12.2639	18.7	20.6	19.5	19	15.7
12.2708	18.6	20.6	19.5	19	15.5
12.2778	18.5	20.6	19.6	19	15.3
12.2847	18.5	20.6	19.6	19	15.3
12.2917	18.4	20.6	19.6	19	15.1
12.2986	18.3	20.6	19.6	19	14.9
12.3056	18.3	20.6	19.6	19	14.5
12.3125	18.2	20.6	19.6	19	14
12.3194	18.1	20.6	19.6	19.1	13.8
12.3264	18	20.6	19.6	19.1	13.7
12.3333	17.9	20.6	19.7	19.1	13.7
12.3403	17.8	20.6	19.7	19.1	13.5
12.3472	17.7	20.6	19.7	19.1	13.2
12.3542	17.6	20.6	19.7	19.1	12.9
12.3611	17.5	20.6	19.7	19.1	12.9
12.3681	17.4	20.6	19.7	19.1	12.7
12.375	17.3	20.6	19.7	19.1	12.7
12.3819	17.2	20.6	19.7	19.1	12.7
12.3889	17.1	20.6	19.7	19.1	12.5
12.3958	17.1	20.6	19.8	19.1	12.5
12.4028	17.1	20.6	19.8	19.1	12.5
12.4097	17	20.6	19.8	19.2	12.4
12.4167	16.9	20.5	19.8	19.2	12.3
12.4236	16.9	20.5	19.8	19.2	12.3
12.4306	16.8	20.5	19.8	19.2	12.2
12.4375	16.7	20.5	19.8	19.2	12.2
12.4444	16.7	20.5	19.8	19.2	12.1
12.4514	16.6	20.5	19.8	19.2	12.1
12.4583	16.5	20.5	19.8	19.2	12
12.4653	16.5	20.5	19.8	19.2	11.9
12.4722	16.4	20.5	19.8	19.2	11.9
12.4792	16.4	20.4	19.9	19.2	11.8
12.4861	16.3	20.4	19.9	19.2	11.9
12.4931	16.3	20.4	19.9	19.2	11.9
12.5	16.2	20.4	19.9	19.2	11.9
12.5069	16.2	20.4	19.9	19.2	11.8
12.5139	16.1	20.4	19.9	19.2	11.8
12.5208	16.1	20.4	19.9	19.2	11.9
12.5278	16	20.3	19.9	19.2	12
12.5347	16	20.3	19.9	19.2	12.1
12.5417	16	20.3	19.9	19.2	12.4
12.5486	16.1	20.3	19.9	19.2	12.6
12.5556	16.1	20.3	19.9	19.2	12.9
12.5625	16.2	20.3	19.9	19.2	13.2
12.5694	16.2	20.2	19.9	19.2	13.5
12.5764	16.3	20.2	19.9	19.2	13.7
12.5833	16.4	20.2	19.9	19.2	14.2
12.5903	16.5	20.2	19.9	19.2	14.7
12.5972	16.7	20.2	19.9	19.2	15.1
12.6042	16.8	20.2	19.9	19.2	15.9
12.6111	17.1	20.1	19.9	19.2	16.8
12.6181	17.3	20.1	19.9	19.2	17
12.625	17.5	20.1	19.9	19.2	17.1
12.6319	17.6	20.1	19.9	19.2	22.3
12.6389	18	20.1	19.9	19.2	20.5
12.6458	18.4	20.1	19.9	19.2	21.3
12.6528	18.7	20	19.9	19.2	20.2
12.6597	19	20	19.9	19.2	22.6
12.6667	19.3	20	19.9	19.2	25.4
12.6736	20	20	19.9	19.2	29.7
12.6806	20.9	20	19.9	19.2	27.5
12.6875	21.6	20	19.9	19.2	24.9
12.6944	22	20	19.9	19.2	22.6
12.7014	22.2	20	19.9	19.2	26.4
12.7083	22.5	20	19.9	19.2	26.8
12.7153	22.9	19.9	19.9	19.2	27.7
12.7222	23.3	19.9	19.9	19.1	27.4
12.7292	23.8	19.9	19.9	19.1	26.6
12.7361	24.3	19.9	19.9	19.1	27.5
12.7431	24.9	19.9	19.9	19.1	28.3
12.75	25.5	19.9	19.9	19.1	28.7
12.7569	26.2	19.9	19.9	19.1	28.4
12.7639	26.6	19.9	19.9	19.1	30.4
12.7708	27.4	19.9	19.9	19.1	30.7
12.7778	28.4	19.9	19.9	19.1	28.1
12.7847	29.1	19.9	19.9	19.1	26.5
12.7917	29.4	19.9	19.9	19.1	30.4
12.7986	30	19.9	19.9	19.1	28.9
12.8056	30.6	20	19.9	19.1	28.6
12.8125	31.3	20	19.9	19.1	27.1
12.8194	31.6	20	19.8	19.1	29.2
12.8264	32	20	19.8	19.1	28.6
12.8333	32.6	20	19.8	19.1	25.9
12.8403	33	20	19.8	19.1	25.7
12.8472	33.1	20.1	19.8	19.1	25.7
12.8542	33.3	20.1	19.8	19.1	28.6
12.8611	33.5	20.1	19.8	19.1	29.6
12.8681	33.5	20.1	19.8	19.1	29.7
12.875	33.5	20.2	19.8	19.1	27.4
12.8819	33.3	20.2	19.8	19.1	29.3
12.8889	33.1	20.2	19.8	19.1	30.9
12.8958	33.1	20.3	19.8	19.1	28.7
12.9028	32.9	20.3	19.8	19.1	29.2
12.9097	32.6	20.4	19.8	19.1	30.2
12.9167	32.6	20.4	19.8	19.1	30.4
12.9236	32.4	20.4	19.8	19.1	32.2
12.9306	32.4	20.5	19.8	19.1	32.6
12.9375	32.4	20.5	19.8	19.1	30
12.9444	32.2	20.6	19.8	19.1	29.9
12.9514	31.8	20.6	19.8	19.1	31.5
12.9583	31.6	20.7	19.8	19.1	31.5
12.9653	31.6	20.7	19.8	19.1	33.7
12.9722	31.6	20.8	19.8	19.2	34.6
12.9792	31.5	20.8	19.8	19.2	38.2
12.9861	31.1	20.9	19.8	19.2	39.8
12.9931	30.7	20.9	19.8	19.2	39.5
13	30.6	21	19.8	19.2	27.2
13.0069	30	21	19.8	19.2	25.3
13.0139	29.1	21	19.8	19.2	24.6
13.0208	28.1	21.2	19.8	19.2	24.2
13.0278	27.4	21.2	19.8	19.3	24
13.0347	26.6	21.2	19.9	19.3	23.6
13.0417	26.2	21.3	19.9	19.3	23.2
13.0486	25.7	21.3	19.9	19.3	23
13.0556	25.3	21.4	19.9	19.3	22.4
13.0625	24.9	21.4	19.9	19.3	22.1
13.0694	24.6	21.4	19.9	19.4	21.7
13.0764	24.3	21.5	19.9	19.4	21.4
13.0833	24	21.5	19.9	19.4	21
13.0903	23.7	21.6	19.9	19.4	20.7
13.0972	23.5	21.6	20	19.4	20.4
13.1042	23.2	21.6	20	19.5	19.9
13.1111	23	21.7	20	19.5	19.7
13.1181	22.7	21.7	20	19.5	19.5
13.125	22.5	21.7	20	19.5	19.1
13.1319	22.3	21.7	20	19.5	19
13.1389	22	21.8	20	19.6	18.7
13.1458	21.9	21.8	20.1	19.6	18.3
13.1528	21.7	21.8	20.1	19.6	18.3
13.1597	21.5	21.8	20.1	19.6	18.2
13.1667	21.4	21.8	20.1	19.6	18
13.1736	21.3	21.9	20.1	19.7	17.8
13.1806	21	21.9	20.2	19.7	17.6
13.1875	20.9	21.9	20.2	19.7	17.5
13.1944	20.8	21.9	20.2	19.7	17.3
13.2014	20.6	21.9	20.2	19.7	17
13.2083	20.5	21.9	20.2	19.8	17
13.2153	20.4	21.9	20.3	19.8	16.9
13.2222	20.3	22	20.3	19.8	16.5
13.2292	20.2	22	20.3	19.8	16.4
13.2361	20	22	20.3	19.8	16.5
13.2431	20	22	20.3	19.9	16.5
13.25	19.9	22	20.3	19.9	16.7
13.2569	19.9	22	20.4	19.9	16.5
13.2639	19.9	22	20.4	19.9	16.4
13.2708	19.8	22	20.4	19.9	16.3
13.2778	19.8	22	20.4	19.9	16.2
13.2847	19.8	22	20.4	20	16.1
13.2917	19.7	22	20.5	20	16.1
13.2986	19.7	22	20.5	20	16
13.3056	19.6	22	20.5	20	16.1
13.3125	19.6	22	20.5	20	15.9
13.3194	19.5	22	20.5	20	15.9
13.3264	19.5	22	20.6	20.1	15.8
13.3333	19.4	22	20.6	20.1	15.7
13.3403	19.4	22	20.6	20.1	15.7
13.3472	19.3	22	20.6	20.1	15.6
13.3542	19.3	22	20.6	20.1	15.6
13.3611	19.2	22	20.6	20.1	15.5
13.3681	19.2	22	20.7	20.1	15.5
13.375	19.2	22	20.7	20.1	15.4
13.3819	19.1	21.9	20.7	20.1	15.3
13.3889	19	21.9	20.7	20.2	15
13.3958	19	21.9	20.7	20.2	15
13.4028	18.9	21.9	20.7	20.2	15
13.4097	18.8	21.9	20.7	20.2	14.7
13.4167	18.8	21.9	20.7	20.2	14.4
13.4236	18.7	21.9	20.8	20.2	14.3
13.4306	18.6	21.9	20.8	20.2	14
13.4375	18.5	21.9	20.8	20.2	13.9
13.4444	18.4	21.9	20.8	20.2	13.9
13.4514	18.3	21.8	20.8	20.2	13.5
13.4583	18.2	21.8	20.8	20.2	13.3
13.4653	18.1	21.8	20.8	20.2	13.2
13.4722	18	21.8	20.8	20.2	13.3
13.4792	18	21.8	20.8	20.2	13.2
13.4861	18	21.8	20.9	20.3	12.9
13.4931	17.9	21.8	20.9	20.3	12.8
13.5	17.8	21.8	20.9	20.3	12.7
13.5069	17.7	21.7	20.9	20.3	12.9
13.5139	17.6	21.7	20.9	20.3	12.9
13.5208	17.5	21.7	20.9	20.3	12.9
13.5278	17.5	21.7	20.9	20.3	12.9
13.5347	17.4	21.7	20.9	20.3	13
13.5417	17.4	21.7	20.9	20.3	13
13.5486	17.4	21.7	20.9	20.3	13.2
13.5556	17.4	21.6	20.9	20.3	13.5
13.5625	17.4	21.6	20.9	20.3	13.8
13.5694	17.5	21.6	20.9	20.3	14.1
13.5764	17.6	21.6	20.9	20.3	14.5
13.5833	17.7	21.6	20.9	20.3	15.1
13.5903	17.8	21.6	20.9	20.3	15.6
13.5972	18	21.5	21	20.3	15.8
13.6042	18.1	21.5	21	20.3	16.4
13.6111	18.3	21.5	21	20.3	17.6
13.6181	18.6	21.5	21	20.3	17.5
13.625	18.8	21.5	21	20.3	18.6
13.6319	19.1	21.5	21	20.3	23.6
13.6389	19.6	21.5	21	20.3	25.3
13.6458	20.1	21.4	21	20.3	26.5
13.6528	20.8	21.4	21	20.3	27.6
13.6597	21.6	21.4	21	20.3	28.7
13.6667	22.3	21.4	21	20.3	28.7
13.6736	23.1	21.4	21	20.3	24.6
13.6806	23.6	21.4	21	20.3	29.1
13.6875	24	21.4	21	20.3	28.9
13.6944	24.5	21.4	21	20.3	28
13.7014	24.6	21.3	21	20.3	27.7
13.7083	25	21.3	21	20.3	30.9
13.7153	25.5	21.3	21	20.3	28
13.7222	26.1	21.3	21	20.3	28.3
13.7292	26.6	21.3	21	20.3	28.9
13.7361	27.2	21.3	21	20.3	30.9
13.7431	27.8	21.3	21	20.3	28.7
13.75	28.4	21.3	21	20.3	29.4
13.7569	28.9	21.3	21	20.3	28.6
13.7639	29.4	21.3	21	20.3	28.4
13.7708	29.9	21.3	21	20.3	29.1
13.7778	30.4	21.3	21	20.2	28.3
13.7847	30.7	21.3	21	20.2	28
13.7917	31.1	21.3	21	20.2	28.7
13.7986	31.4	21.4	21	20.2	29.1
13.8056	31.8	21.4	21	20.2	28.6
13.8125	32	21.4	21	20.2	29.3
13.8194	32.6	21.4	21	20.2	30
13.8264	33.1	21.4	21	20.2	28.7
13.8333	33.3	21.4	21	20.2	29.7
13.8403	33.5	21.5	21	20.2	29.9
13.8472	33.5	21.5	21	20.2	29.7
13.8542	33.7	21.5	20.9	20.2	30.4
13.8611	33.7	21.5	20.9	20.2	31.8
13.8681	33.9	21.6	20.9	20.2	31.8
13.875	34.4	21.6	20.9	20.2	33
13.8819	34.8	21.6	20.9	20.2	30.6
13.8889	35	21.7	20.9	20.3	28
13.8958	34.1	21.7	20.9	20.3	26.6
13.9028	33.2	21.7	20.9	20.3	24.5
13.9097	31.8	21.8	20.9	20.3	23.3
13.9167	30.2	21.8	20.9	20.3	22.3
13.9236	28.8	21.8	20.9	20.3	20.9
13.9306	27.5	21.9	20.9	20.3	19.8
13.9375	26.5	21.9	20.9	20.3	20.6
13.9444	26.1	21.9	20.9	20.3	21.4
13.9514	26	22	20.9	20.3	20.9
13.9583	25.9	22	20.9	20.3	21.7
13.9653	25.9	22.2	20.9	20.3	20.7
13.9722	25.8	22.2	21	20.3	20.7
[truncated: 634 more rows]
