# Supplementary material for: Temperature Load Parameters and Thermal Effects of a Long‐Span Concrete‐Filled Steel Tube Arch Bridge in Tibet
Source: Hindawi journal article supplement (doi:10.1155/2020/9710613), 2020-01-01
Supplement: f1 [file 9710613.f1.zip › 9710613.f1/fig.5(a).xls]

## Sheet: Sheet1
time	1	2	3	4	5	6	7	0
0.00694444	20.6	--					--
0.0138889	20.9	--					--
0.0208333	21.2	--					--
0.0277778	21.5	--					--
0.0347222	21.9	21					--
0.0416667	22.4	21			--	--	--
0.0486111	22.9	21	--		--	18.6	--
0.0555556	23.3	21	21.2		--	18.6	--
0.0625	23.6	21	21.2	--	21	18.6	--
0.0694444	23.8	20.9	21.2	20.3	21	18.6	--
0.0763889	24	20.9	21.2	20.2	21	18.6	--	--
0.0833333	23.9	20.9	21.2	20.2	21	18.5	--	25.8
0.0902778	23.9	20.9	21.2	20.2	21	18.5	--	26.5
0.0972222	24	20.9	21.2	20.2	21	18.5	--	26.2
0.104167	24.1	20.9	21.2	20.2	21	18.5	--	25.9
0.111111	24.1	20.9	21.2	20.2	21	18.5	--	26.5
0.118056	24.2	20.9	21.2	20.2	21	18.5	--	27.8
0.125	24.5	20.9	21.2	20.2	21	18.5	--	28.7
0.131944	24.9	20.9	21.2	20.2	21	18.5	--	31.5
0.138889	25.5	20.9	21.1	20.2	21	18.6	--	33.3
0.145833	26.4	20.9	21.1	20.2	21	18.6	--	29.2
0.152778	26.9	20.9	21	20.2	21	18.6	--	29.2
0.159722	27.2	21	21	20.2	20.9	18.6	--	29.6
0.166667	27.5	21	21	20.2	20.9	18.6	--	28.1
0.173611	27.5	21	21	20.2	20.9	18.6	--	28
0.180556	27.5	21	21	20.2	20.9	18.6	--	29.4
0.1875	27.8	21	21	20.2	20.9	18.6	--	28.9
0.194444	28.3	21	21	20.2	20.9	18.6	--	32.2
0.201389	28.7	21	21	20.2	20.9	18.7	--	29.1
0.208333	28.9	21	21	20.2	20.9	18.7	--	28.7
0.215278	29.1	21	21	20.2	20.9	18.7	--	28
0.222222	29.2	21	21	20.2	20.9	18.7	--	27.4
0.229167	29.1	21.2	21	20.2	20.9	18.7	--	26.8
0.236111	28.9	21.2	21	20.1	20.9	18.8	--	27.5
0.243056	28.6	21.2	21	20.1	20.9	18.8	--	28.3
0.25	28.3	21.2	21	20.1	20.9	18.8	--	26.4
0.256944	28	21.2	21	20.1	20.9	18.8	--	25.7
0.263889	27.2	21.2	20.9	20.1	20.9	18.9	--	25.7
0.270833	26.6	21.3	20.9	20.1	20.8	18.9	--	24.4
0.277778	26	21.3	20.9	20.1	20.8	18.9	--	22.7
0.284722	25.3	21.3	20.9	20.1	20.8	19	--	21.2
0.291667	24	21.3	20.9	20.1	20.8	19	--	21.1
0.298611	22.9	21.3	20.9	20.1	20.8	19	--	20.1
0.305556	22.2	21.4	20.9	20.1	20.8	19	--	20.8
0.3125	21.7	21.4	20.9	20.1	20.8	19.1	--	21.2
0.319444	21.6	21.4	20.9	20.1	20.8	19.1	--	21.8
0.326389	21.7	21.4	20.9	20.1	20.8	19.2	--	20.9
0.333333	21.8	21.4	20.9	20.1	20.8	19.2	--	21.4
0.340278	21.8	21.5	20.9	20.1	20.8	19.2	--	21.4
0.347222	21.7	21.5	20.9	20.1	20.8	19.2	--	20.2
0.354167	21.6	21.5	20.9	20.1	20.8	19.3	--	20.5
0.361111	21.5	21.5	20.9	20.1	20.8	19.3	--	20.5
0.368056	21.5	21.5	20.9	20.1	20.8	19.3	--	20.2
0.375	21.4	21.5	20.9	20.1	20.8	19.3	--	20
0.381944	21.3	21.6	20.9	20.1	20.8	19.4	--	19.8
0.388889	21	21.6	20.9	20	20.8	19.4	--	19.9
0.395833	20.9	21.6	20.9	20	20.8	19.4	--	20
0.402778	20.8	21.6	20.9	20	20.8	19.4	--	19.8
0.409722	20.7	21.6	20.9	20	20.8	19.4	--	19.6
0.416667	20.6	21.6	20.9	20	20.8	19.5	--	19.3
0.423611	20.5	21.6	20.9	20	20.8	19.5	--	19.4
0.430556	20.4	21.6	20.9	20	20.8	19.5	--	19.1
0.4375	20.3	21.6	20.9	20	20.8	19.5	--	18.8
0.444444	20.1	21.6	20.9	20	20.9	19.5	--	18.9
0.451389	20	21.7	20.9	20.1	20.9	19.5	--	18.7
0.458333	20	21.7	20.9	20.1	20.9	19.5	--	18.8
0.465278	19.9	21.7	21	20.1	20.9	19.5	--	18.6
0.472222	19.9	21.7	21	20.1	20.9	19.5	--	18.4
0.479167	19.8	21.7	21	20.1	20.9	19.5	--	18.3
0.486111	19.7	21.7	21	20.1	20.9	19.5	--	18.4
0.493056	19.7	21.7	21	20.1	20.9	19.5	20	18.3
0.5	19.6	21.7	21	20.1	20.9	19.5	20	18.5
0.506944	19.6	21.7	21	20.1	20.9	19.5	19.9	18.4
0.513889	19.5	21.7	21	20.1	20.9	19.5	19.8	18.2
0.520833	19.5	21.7	21	20.1	20.9	19.5	19.7	18
0.527778	19.4	21.7	21	20.1	20.9	19.5	19.6	17.8
0.534722	19.3	21.7	21	20.1	20.9	19.5	19.5	17.8
0.541667	19.2	21.7	21	20.1	20.9	19.5	19.4	17.6
0.548611	19.1	21.7	21	20.1	21	19.5	19.3	17.4
0.555556	19	21.7	21	20.1	21	19.5	19.2	17.3
0.5625	19	21.7	21	20.1	21	19.5	19.1	17.2
0.569444	18.9	21.7	21	20.1	21	19.5	19	17.2
0.576389	18.8	21.7	21	20.1	21	19.5	18.9	17.1
0.583333	18.8	21.7	21	20.1	21	19.5	18.9	17.1
0.590278	18.7	21.7	21.1	20.1	21	19.5	18.8	17
0.597222	18.7	21.7	21.1	20.1	21	19.5	18.7	17
0.604167	18.6	21.7	21.2	20.1	21	19.4	18.6	16.9
0.611111	18.6	21.7	21.2	20.1	21	19.4	18.5	16.8
0.618056	18.5	21.6	21.2	20.1	21	19.4	18.5	16.6
0.625	18.4	21.6	21.2	20.1	21	19.4	18.4	16.6
0.631944	18.4	21.6	21.2	20.1	21	19.4	18.3	16.7
0.638889	18.4	21.6	21.2	20.1	21	19.4	18.3	16.6
0.645833	18.3	21.6	21.2	20.1	21	19.4	18.2	16.6
0.652778	18.3	21.6	21.2	20.1	21	19.4	18.2	16.5
0.659722	18.2	21.6	21.2	20.1	21	19.3	18.1	16.4
0.666667	18.2	21.6	21.2	20.1	21	19.3	18	16.4
0.673611	18.2	21.6	21.2	20.1	21	19.3	18	16.2
0.680556	18.1	21.6	21.2	20.1	21	19.3	17.9	16.3
0.6875	18	21.6	21.2	20.2	21	19.3	17.9	16.4
0.694444	18	21.6	21.2	20.2	21	19.3	17.8	16.4
0.701389	18	21.5	21.2	20.2	21	19.2	17.8	16.4
0.708333	18	21.5	21.2	20.2	21	19.2	17.8	16.5
0.715278	18	21.5	21.2	20.2	21.1	19.2	17.7	16.3
0.722222	17.9	21.5	21.2	20.2	21.1	19.2	17.7	16.3
0.729167	17.9	21.5	21.2	20.2	21.1	19.2	17.7	16.3
0.736111	17.9	21.5	21.2	20.2	21.1	19.2	17.6	16.1
0.743056	17.8	21.5	21.2	20.2	21.1	19.1	17.6	16.1
0.75	17.8	21.5	21.2	20.2	21.1	19.1	17.5	16
0.756944	17.7	21.5	21.2	20.2	21.1	19.1	17.5	16.1
0.763889	17.7	21.4	21.2	20.2	21.1	19.1	17.4	16.1
0.770833	17.7	21.4	21.2	20.2	21.1	19.1	17.4	16
0.777778	17.6	21.4	21.2	20.2	21.1	19.1	17.4	16
0.784722	17.6	21.4	21.2	20.2	21.1	19	17.3	16.1
0.791667	17.6	21.4	21.2	20.2	21.1	19	17.3	15.9
0.798611	17.6	21.4	21.2	20.2	21.1	19	17.3	16
0.805556	17.5	21.4	21.2	20.2	21.1	19	17.2	15.8
0.8125	17.5	21.3	21.2	20.2	21	19	17.2	15.9
0.819444	17.5	21.3	21.2	20.2	21	18.9	17.2	16.1
0.826389	17.5	21.3	21.2	20.2	21	18.9	17.1	15.9
0.833333	17.5	21.3	21.2	20.2	21	18.9	17.1	15.9
0.840278	17.4	21.3	21.2	20.2	21	18.9	17.1	15.9
0.847222	17.4	21.3	21.2	20.2	21	18.9	17.1	15.9
0.854167	17.4	21.3	21.2	20.2	21	18.9	17.1	16
0.861111	17.4	21.2	21.2	20.2	21	18.8	17.1	16
0.868056	17.4	21.2	21.2	20.2	21	18.8	17.1	16
0.875	17.4	21.2	21.2	20.2	21	18.8	17.1	16
0.881944	17.4	21.2	21.2	20.2	21	18.8	17.1	16.4
0.888889	17.4	21.2	21.2	20.2	21	18.8	17.1	16.5
0.895833	17.5	21.2	21.2	20.2	21	18.7	17.2	16.6
0.902778	17.6	21.1	21.2	20.2	21	18.7	17.3	16.8
0.909722	17.7	21	21.2	20.2	21	18.7	17.4	16.7
0.916667	17.7	21	21.2	20.2	21	18.7	17.4	17
0.923611	17.8	21	21.2	20.2	21	18.7	17.5	17.8
0.930556	18	21	21.2	20.2	21	18.7	17.7	18
0.9375	18.1	21	21.2	20.2	21	18.6	17.9	18.1
0.944444	18.3	21	21.2	20.2	21	18.6	18	18.6
0.951389	18.5	21	21.2	20.2	21	18.6	18.2	18.9
0.958333	18.8	20.9	21.2	20.2	21	18.6	18.4	19.6
0.965278	19	20.9	21.2	20.2	21	18.6	18.7	19.7
0.972222	19.3	20.9	21.2	20.2	21	18.5	18.9	19.8
0.979167	19.5	20.9	21.1	20.2	21	18.5	19.1	20
0.986111	19.7	20.9	21.1	20.2	21	18.5	19.2	20.2
0.993056	19.9	20.9	21.1	20.2	21	18.5	19.4	20.5
1	20	20.9	21	20.1	21	18.5	19.6	21.1
1.00694	20.3	20.8	21	20.1	20.9	18.5	19.8	21.5
1.01389	20.5	20.8	21	20.1	20.9	18.5	20	22.2
1.02083	20.7	20.8	21	20.1	20.9	18.4	20.3	23.1
1.02778	21.2	20.8	21	20.1	20.9	18.4	20.6	23.2
1.03472	21.6	20.8	21	20.1	20.9	18.4	20.9	23.1
1.04167	21.8	20.8	21	20.1	20.9	18.4	21	22.6
1.04861	21.9	20.8	21	20.1	20.9	18.4	21	22.5
1.05556	21.9	20.8	21	20.1	20.9	18.4	21	21.7
1.0625	21.8	20.8	21	20.1	20.9	18.4	20.9	21.4
1.06944	21.5	20.8	21	20.1	20.9	18.4	20.8	21.8
1.07639	21.4	20.8	21	20.1	20.9	18.4	21.2	23.3
1.08333	21.5	20.8	21	20.1	20.9	18.4	21.6	24.1
1.09028	21.9	20.8	21	20.1	20.9	18.4	21.8	24.3
1.09722	22.4	20.7	21	20.1	20.9	18.4	22	24.2
1.10417	22.6	20.7	21	20.1	20.9	18.4	22	22.8
1.11111	22.7	20.7	20.9	20.1	20.9	18.4	22.2	24.9
1.11806	22.9	20.7	20.9	20.1	20.8	18.4	22.3	24.3
1.125	23.1	20.7	20.9	20.1	20.8	18.4	22.3	22.7
1.13194	23	20.7	20.9	20.1	20.8	18.4	21.8	23
1.13889	22.6	20.7	20.9	20.1	20.8	18.4	21.9	23.3
1.14583	22.6	20.7	20.9	20.1	20.8	18.4	22	24
1.15278	22.6	20.7	20.9	20.1	20.8	18.4	22.3	25.7
1.15972	22.9	20.7	20.9	20.1	20.8	18.4	22.6	27.8
1.16667	23.3	20.7	20.9	20.1	20.8	18.4	23	27.4
1.17361	23.8	20.7	20.9	20.1	20.8	18.4	23.2	28.3
1.18056	24.3	20.7	20.9	20.1	20.8	18.4	23.6	28.7
1.1875	24.7	20.8	20.9	20	20.8	18.4	23.7	25.7
1.19444	24.9	20.8	20.9	20	20.8	18.4	23.6	24
1.20139	24.6	20.8	20.8	20	20.8	18.4	23.5	23.8
1.20833	24.1	20.8	20.8	20	20.7	18.4	23.5	24.9
1.21528	23.8	20.8	20.8	20	20.7	18.4	23.6	26.6
1.22222	24.1	20.8	20.8	20	20.7	18.4	23.7	28.1
1.22917	25	20.8	20.8	20	20.7	18.5	23.8	26.9
1.23611	25.9	20.8	20.8	20	20.7	18.5	23.8	28
1.24306	26.8	20.8	20.8	20	20.7	18.5	24	27.1
1.25	27.5	20.8	20.8	20	20.7	18.5	24	25.3
1.25694	27.7	20.8	20.8	20	20.7	18.5	24	26.4
1.26389	27.7	20.8	20.8	20	20.7	18.5	24.1	26.5
1.27083	27.7	20.9	20.8	20	20.7	18.6	24.2	25.3
1.27778	27.4	20.9	20.8	20	20.7	18.6	24.2	24.6
1.28472	26.9	20.9	20.8	20	20.7	18.6	24.2	23.3
1.29167	26.2	20.9	20.8	20	20.7	18.6	24	22.8
1.29861	25.3	20.9	20.8	20	20.7	18.6	23.7	22.4
1.30556	24.5	20.9	20.8	20	20.7	18.7	23.5	22.5
1.3125	23.8	20.9	20.8	20	20.7	18.7	23.2	21.5
1.31944	23.3	20.9	20.8	19.9	20.7	18.7	23	22
1.32639	22.9	21	20.7	19.9	20.7	18.7	23	21.8
1.33333	22.6	21	20.7	19.9	20.7	18.7	22.9	21.9
1.34028	22.4	21	20.7	19.9	20.6	18.8	22.6	21.5
1.34722	22.2	21	20.7	19.9	20.6	18.8	22.4	21
1.35417	21.9	21	20.7	19.9	20.6	18.8	22.2	20.4
1.36111	21.5	21	20.7	19.9	20.6	18.8	21.8	19.4
1.36806	21	21	20.7	19.9	20.6	18.9	21.4	18.5
1.375	20.5	21.1	20.7	19.9	20.6	18.9	21.2	18
1.38194	20	21.1	20.7	19.9	20.6	18.9	20.7	18.6
1.38889	19.5	21.2	20.7	19.9	20.6	18.9	20.3	18.5
1.39583	19.2	21.2	20.7	19.9	20.6	18.9	20	17.8
1.40278	18.9	21.2	20.7	19.9	20.6	18.9	19.6	17.3
1.40972	18.7	21.2	20.7	19.9	20.6	19	19.1	17.2
1.41667	18.5	21.2	20.7	19.9	20.6	19	18.9	17.2
1.42361	18.3	21.2	20.7	19.9	20.6	19	18.9	17.3
1.43056	18.2	21.2	20.7	19.9	20.6	19	18.7	16.8
1.4375	18.1	21.2	20.7	19.9	20.6	19	18.3	16.4
1.44444	18	21.2	20.7	19.9	20.6	19	18	16.1
1.45139	17.9	21.2	20.7	19.9	20.6	19	18	16.4
1.45833	17.8	21.2	20.7	19.9	20.6	19	18	16.6
1.46528	17.7	21.2	20.7	19.9	20.6	19	18	16.4
1.47222	17.7	21.2	20.7	19.9	20.6	19	18	16.5
1.47917	17.7	21.2	20.7	19.9	20.6	19	18	16.5
1.48611	17.7	21.2	20.7	19.9	20.6	19	18	16.5
1.49306	17.7	21.2	20.7	19.9	20.6	19	18	16.3
1.5	17.7	21.2	20.7	19.9	20.6	19	17.9	16.1
1.50694	17.7	21.2	20.7	19.9	20.7	19	17.9	16.4
1.51389	17.6	21.2	20.7	19.9	20.7	19	17.8	16.5
1.52083	17.6	21.2	20.7	19.9	20.7	19	17.6	16.4
1.52778	17.5	21.2	20.7	19.9	20.7	19	17.5	16.6
1.53472	17.4	21.2	20.7	19.9	20.7	19	17.4	16.4
1.54167	17.4	21.2	20.7	19.9	20.7	19	17.3	16.4
1.54861	17.3	21.2	20.8	19.9	20.7	19	17.2	16.3
1.55556	17.2	21.2	20.8	19.9	20.7	19	17.1	16.1
1.5625	17.2	21.2	20.8	19.9	20.7	19	17	15.9
1.56944	17.1	21.2	20.8	19.9	20.7	18.9	16.9	15.9
1.57639	17.1	21.2	20.8	19.9	20.7	18.9	16.9	16.1
1.58333	17.1	21.1	20.8	19.9	20.7	18.9	16.9	16.3
1.59028	17	21	20.8	19.9	20.7	18.9	17	16.2
1.59722	17	21	20.8	19.9	20.7	18.9	17	16.4
1.60417	17	21	20.8	19.9	20.7	18.9	17.1	16.4
1.61111	17	21	20.8	19.9	20.7	18.9	17.1	16.4
1.61806	17	21	20.8	19.9	20.7	18.8	17.1	16.4
1.625	17	21	20.8	19.9	20.7	18.8	17.1	16.1
1.63194	17	21	20.8	19.9	20.7	18.8	17.1	16
1.63889	17	21	20.8	19.9	20.7	18.8	17.1	16.4
1.64583	17	20.9	20.8	19.9	20.7	18.8	17.1	16.4
1.65278	17	20.9	20.8	19.9	20.7	18.8	17.1	16.3
1.65972	17	20.9	20.8	19.9	20.7	18.7	17.1	16
1.66667	17	20.9	20.8	19.9	20.7	18.7	17.1	15.8
1.67361	17	20.9	20.8	19.9	20.7	18.7	17	15.7
1.68056	17	20.9	20.8	19.9	20.7	18.7	17	15.7
1.6875	16.9	20.9	20.8	19.9	20.7	18.7	16.9	15.5
1.69444	16.9	20.8	20.8	19.9	20.7	18.7	16.9	15.6
1.70139	16.9	20.8	20.8	19.9	20.7	18.6	16.8	15.6
1.70833	16.9	20.8	20.8	19.9	20.7	18.6	16.8	15.6
1.71528	16.9	20.8	20.8	19.9	20.7	18.6	16.8	15.7
1.72222	16.9	20.8	20.8	19.9	20.7	18.6	16.8	15.6
1.72917	16.9	20.8	20.8	19.9	20.7	18.6	16.7	15.9
1.73611	16.9	20.8	20.8	19.9	20.7	18.5	16.7	15.9
1.74306	16.9	20.7	20.8	19.9	20.7	18.5	16.7	15.5
1.75	16.8	20.7	20.8	19.9	20.7	18.5	16.7	15.5
1.75694	16.8	20.7	20.8	19.9	20.7	18.5	16.6	15.4
1.76389	16.8	20.7	20.8	19.9	20.7	18.5	16.6	15.5
1.77083	16.8	20.7	20.8	19.9	20.7	18.5	16.5	15.5
1.77778	16.8	20.7	20.8	19.9	20.7	18.4	16.5	15.5
1.78472	16.8	20.6	20.8	19.9	20.7	18.4	16.5	15.6
1.79167	16.7	20.6	20.7	19.9	20.7	18.4	16.5	15.7
1.79861	16.7	20.6	20.7	19.9	20.6	18.4	16.5	15.8
1.80556	16.7	20.6	20.7	19.9	20.6	18.4	16.4	15.9
1.8125	16.6	20.6	20.7	19.9	20.6	18.3	16.4	15.8
1.81944	16.6	20.5	20.7	19.9	20.6	18.3	16.3	15.6
1.82639	16.5	20.5	20.7	19.9	20.6	18.3	16.2	15.5
1.83333	16.5	20.5	20.7	19.9	20.6	18.3	16.1	15.2
1.84028	16.4	20.5	20.7	19.9	20.6	18.3	15.9	15.1
1.84722	16.3	20.5	20.7	19.9	20.6	18.2	15.9	15
1.85417	16.3	20.5	20.7	19.9	20.6	18.2	15.8	15
1.86111	16.2	20.4	20.7	19.9	20.6	18.2	15.7	15
1.86806	16.2	20.4	20.7	19.9	20.6	18.2	15.7	15.1
1.875	16.2	20.4	20.7	19.9	20.6	18.2	15.6	15.2
1.88194	16.2	20.4	20.7	19.9	20.6	18.2	15.7	15.4
1.88889	16.3	20.4	20.7	19.9	20.6	18.1	15.7	15.4
1.89583	16.3	20.4	20.7	19.9	20.6	18.1	15.9	15.5
1.90278	16.4	20.3	20.7	19.9	20.5	18.1	15.9	15.8
1.90972	16.4	20.3	20.6	19.8	20.5	18.1	16.1	16.2
1.91667	16.6	20.3	20.6	19.8	20.5	18.1	16.2	16.3
1.92361	16.7	20.3	20.6	19.8	20.5	18	16.4	16.4
1.93056	16.9	20.3	20.6	19.8	20.5	18	16.4	16.4
1.9375	17	20.3	20.6	19.8	20.5	18	16.5	17
1.94444	17.1	20.2	20.6	19.8	20.5	18	16.8	17.6
1.95139	17.4	20.2	20.6	19.8	20.5	18	17.1	18.2
1.95833	17.7	20.2	20.6	19.8	20.5	18	17.3	18.2
1.96528	18	20.2	20.6	19.8	20.5	18	17.5	18.6
1.97222	18.3	20.2	20.6	19.8	20.5	18	17.8	19.5
1.97917	18.6	20.2	20.6	19.8	20.5	18	18	19.4
1.98611	18.8	20.1	20.6	19.8	20.5	18	18.1	19.9
1.99306	19.1	20.1	20.6	19.8	20.4	18	18.4	19.9
2	19.4	20.1	20.5	19.8	20.4	17.9	18.5	19.8
2.00694	19.5	20.1	20.5	19.8	20.4	17.9	18.6	20
2.01389	19.7	20.1	20.5	19.8	20.4	17.9	18.8	20.7
2.02083	19.9	20.1	20.5	19.8	20.4	17.9	19.1	21.2
2.02778	20.2	20.1	20.5	19.8	20.4	17.9	19.3	21.7
2.03472	20.5	20.1	20.5	19.8	20.4	17.9	19.4	21.7
2.04167	20.7	20	20.5	19.8	20.4	17.9	19.7	22.3
2.04861	20.9	20	20.5	19.8	20.4	17.8	19.8	21.9
2.05556	21.2	20	20.5	19.8	20.4	17.8	20	24.3
2.0625	21.5	20	20.5	19.8	20.4	17.8	20.7	26
2.06944	22.3	20	20.5	19.7	20.4	17.8	21.2	25.3
2.07639	22.9	20	20.5	19.7	20.3	17.8	21.3	24
2.08333	23.1	20	20.4	19.7	20.3	17.8	21.3	25.4
2.09028	23.2	20	20.4	19.7	20.3	17.8	21.6	24.2
2.09722	23.4	20	20.4	19.7	20.3	17.8	21.7	24.2
2.10417	23.3	20	20.4	19.7	20.3	17.8	21.9	24.7
2.11111	23.3	20	20.4	19.7	20.3	17.8	22.2	25.5
2.11806	23.3	20	20.4	19.7	20.3	17.8	22.3	26.5
2.125	23.5	20	20.4	19.7	20.3	17.8	22.5	24.9
2.13194	23.7	20	20.4	19.7	20.3	17.8	23	29.9
2.13889	24.6	20	20.4	19.7	20.2	17.8	23.6	32.6
2.14583	25.7	20	20.3	19.7	20.2	17.8	24.1	32.8
2.15278	27.1	20	20.3	19.7	20.2	17.8	24.5	34.4
2.15972	28.4	20	20.3	19.7	20.2	17.8	24.7	28.6
2.16667	28.9	20	20.3	19.7	20.2	17.8	24.6	28.4
2.17361	28.7	20	20.3	19.7	20.2	17.8	24.5	27.8
2.18056	28.4	20	20.3	19.6	20.2	17.8	24.4	29
2.1875	28.3	20	20.3	19.6	20.2	17.8	24.6	29.4
2.19444	28.6	20.1	20.3	19.6	20.2	17.8	24.6	26.8
2.20139	28.1	20.1	20.3	19.6	20.2	17.9	24.6	26.4
2.20833	27.7	20.1	20.3	19.6	20.2	17.9	24.5	26.6
2.21528	27.4	20.1	20.3	19.6	20.2	17.9	24.5	25.9
2.22222	27.1	20.1	20.3	19.6	20.1	17.9	24.5	27.2
2.22917	26.9	20.1	20.2	19.6	20.1	17.9	24.6	27.5
2.23611	27.4	20.2	20.2	19.6	20.1	18	24.7	25.8
2.24306	27.5	20.2	20.2	19.6	20.1	18	24.7	25.3
2.25	27.2	20.2	20.2	19.6	20.1	18	24.7	25.3
2.25694	26.9	20.2	20.2	19.6	20.1	18	24.6	24.5
2.26389	26.5	20.2	20.2	19.6	20.1	18	24.3	23.2
2.27083	25.7	20.3	20.2	19.5	20.1	18	24.1	22.6
2.27778	24.9	20.3	20.2	19.5	20.1	18	23.8	22.4
2.28472	24.2	20.3	20.2	19.5	20.1	18	23.6	22.3
2.29167	23.6	20.3	20.2	19.5	20.1	18.1	23.2	20.5
2.29861	22.9	20.3	20.2	19.5	20.1	18.1	22.5	21.2
2.30556	22.3	20.4	20.2	19.5	20.1	18.1	21.9	20.3
2.3125	21.5	20.4	20.2	19.5	20	18.2	21.4	19.7
2.31944	20.9	20.4	20.1	19.5	20	18.2	20.9	19.7
2.32639	20.5	20.4	20.1	19.5	20	18.2	20.6	19.6
2.33333	20.2	20.4	20.1	19.5	20	18.2	20.3	18.4
2.34028	19.9	20.5	20.1	19.5	20	18.3	20	18.3
2.34722	19.7	20.5	20.1	19.5	20	18.3	19.9	19
2.35417	19.5	20.5	20.1	19.5	20	18.3	19.9	19.2
2.36111	19.4	20.5	20.1	19.5	20	18.3	19.9	18.4
2.36806	19.3	20.5	20.1	19.4	20	18.4	19.8	18.3
2.375	19.3	20.5	20.1	19.4	20	18.4	19.8	18.4
2.38194	19.2	20.6	20.1	19.4	20	18.4	19.6	18.5
2.38889	19.1	20.6	20.1	19.4	20	18.4	19.3	17.6
2.39583	18.9	20.6	20.1	19.4	20	18.4	19.2	18
2.40278	18.7	20.6	20.1	19.4	20	18.4	19.1	17.9
2.40972	18.5	20.6	20.1	19.4	20	18.5	19	18
2.41667	18.3	20.6	20.1	19.4	20	18.5	18.9	18
2.42361	18.2	20.6	20.1	19.4	20	18.5	18.9	18
2.43056	18.2	20.6	20.1	19.4	20	18.5	18.8	17.2
2.4375	18.1	20.6	20.1	19.4	20	18.5	18.7	17.5
2.44444	18	20.6	20.1	19.4	20	18.5	18.7	17.3
2.45139	18	20.6	20.1	19.4	20	18.5	18.6	17.2
2.45833	17.9	20.6	20.2	19.4	20	18.5	18.5	16.7
2.46528	17.8	20.6	20.2	19.4	20	18.5	18.4	17.4
2.47222	17.6	20.7	20.2	19.4	20.1	18.5	18.4	17.6
2.47917	17.5	20.6	20.2	19.4	20.1	18.5	18.3	17.3
2.48611	17.5	20.6	20.2	19.4	20.1	18.5	18.3	17.3
2.49306	25.5	19.7	20	19.3	19.8	17.5	25.1	30.1
2.5	25.7	19.7	20	19.2	19.8	17.5	25.4	29.1
2.50694	25.8	19.7	19.9	19.2	19.8	17.5	25.7	33.1
2.51389	26.2	19.7	19.9	19.2	19.8	17.5	25.9	31.5
2.52083	26.6	19.7	19.9	19.2	19.7	17.5	25.9	32.2
2.52778	26.4	19.7	19.9	19.2	19.7	17.5	25.3	22
2.53472	25.5	19.7	19.9	19.2	19.7	17.6	24	20.9
2.54167	24.5	19.7	19.9	19.2	19.7	17.6	23.1	20.3
2.54861	23.3	19.7	19.9	19.2	19.7	17.6	21.9	18.6
2.55556	22.2	19.7	19.9	19.2	19.7	17.6	20.9	19.7
2.5625	21.4	19.8	19.9	19.2	19.7	17.6	21	21
2.56944	21	19.8	19.9	19.2	19.7	17.6	21.1	21.6
2.57639	20.9	19.8	19.8	19.2	19.7	17.6	21.2	21.3
2.58333	20.9	19.8	19.8	19.1	19.7	17.6	21.3	22.5
2.59028	21.4	19.8	19.8	19.1	19.7	17.7	21.6	23.8
2.59722	22.1	19.8	19.8	19.1	19.6	17.7	21.9	23.8
2.60417	22.6	19.8	19.8	19.1	19.6	17.7	21.8	21.4
2.61111	22.3	19.9	19.8	19.1	19.6	17.8	21.5	20
2.61806	21.6	19.9	19.8	19.1	19.6	17.8	20.8	19.2
2.625	20.9	19.9	19.8	19.1	19.6	17.8	20.4	18.6
2.63194	20.4	19.9	19.8	19.1	19.6	17.8	19.9	17.7
2.63889	19.9	19.9	19.8	19.1	19.6	17.8	19.4	17.1
2.64583	19.3	19.9	19.8	19.1	19.6	17.8	19	17.4
2.65278	19	19.9	19.8	19.1	19.6	17.9	18.9	17.3
2.65972	18.8	19.9	19.8	19.1	19.6	17.9	18.7	17.7
2.66667	18.6	20	19.8	19.1	19.6	17.9	18.6	17.4
2.67361	18.5	20	19.8	19.1	19.6	17.9	18.4	17.2
2.68056	18.2	20	19.8	19.1	19.6	17.9	18.2	17.2
2.6875	18	20	19.7	19.1	19.6	17.9	18	16.8
2.69444	17.8	20	19.7	19	19.6	17.9	17.8	16.6
2.70139	17.6	20	19.7	19	19.6	17.9	17.6	16.5
2.70833	17.5	20	19.7	19	19.6	17.9	17.5	16.7
2.71528	17.4	20	19.7	19	19.6	17.9	17.4	16.4
2.72222	17.3	20	19.7	19	19.5	17.9	17.1	15.5
2.72917	17.2	20	19.7	19	19.5	18	16.8	15.3
2.73611	17	20	19.7	19	19.5	17.9	16.5	14.8
2.74306	16.9	20	19.7	19	19.5	17.9	16.2	14.2
2.75	16.6	20	19.7	19	19.5	18	15.9	14.5
2.75694	16.5	20	19.7	19	19.5	18	15.9	14.2
2.76389	16.4	20	19.7	19	19.5	17.9	15.7	14.3
2.77083	16.4	20	19.7	19	19.5	17.9	15.8	14.8
2.77778	16.3	20	19.7	19	19.5	17.9	15.8	14.5
2.78472	16.3	20	19.7	19	19.5	17.9	15.9	14.9
2.79167	16.3	20	19.7	19	19.5	17.9	15.9	15.2
2.79861	16.3	20	19.7	19	19.5	17.9	16	15
2.80556	16.3	20	19.7	19	19.5	17.9	16	14.9
2.8125	16.3	20	19.7	19	19.5	17.9	15.9	14.7
2.81944	16.3	20	19.7	19	19.5	17.9	15.9	14.9
2.82639	16.2	20	19.8	19	19.5	17.9	15.8	14.4
2.83333	16.2	20	19.7	19	19.5	17.9	15.6	14.2
2.84028	16.1	20	19.8	19	19.5	17.8	15.5	14.5
2.84722	16	19.9	19.8	19	19.5	17.8	15.5	14.6
2.85417	16	19.9	19.8	19	19.5	17.8	15.5	14.5
2.86111	15.9	19.9	19.8	19	19.5	17.8	15.4	14.6
2.86806	15.9	19.9	19.8	19	19.5	17.8	15.3	14.7
2.875	15.8	19.9	19.8	19	19.5	17.8	15.3	14.6
2.88194	15.8	19.9	19.8	19	19.5	17.8	15.3	14.3
2.88889	15.8	19.9	19.8	19	19.5	17.7	15.2	14.4
2.89583	15.7	19.9	19.8	19	19.5	17.7	15.1	14.8
2.90278	15.7	19.8	19.8	19	19.5	17.7	15.1	14.6
2.90972	15.7	19.8	19.8	19	19.5	17.7	15.1	14.2
2.91667	15.6	19.8	19.8	19	19.5	17.7	15	13.8
2.92361	15.6	19.8	19.8	19	19.5	17.7	14.8	13.4
2.93056	15.5	19.8	19.8	19	19.5	17.6	14.7	13.5
2.9375	15.5	19.8	19.8	19	19.5	17.6	14.7	13.8
2.94444	15.5	19.8	19.8	19	19.5	17.6	14.7	13.9
2.95139	15.4	19.7	19.8	19	19.5	17.6	14.8	14.1
2.95833	15.4	19.7	19.8	19	19.5	17.5	14.8	14.4
2.96528	15.4	19.7	19.7	19	19.5	17.5	14.9	14.4
2.97222	15.5	19.7	19.7	19	19.5	17.5	15	14.6
2.97917	15.5	19.7	19.7	19	19.5	17.5	15	14.6
2.98611	15.5	19.7	19.7	19	19.5	17.5	15	14.7
2.99306	15.5	19.6	19.7	19	19.5	17.4	15.1	14.8
3	15.5	19.6	19.7	19	19.5	17.4	15.1	14.7
3.00694	15.6	19.6	19.7	19	19.5	17.4	15.2	14.9
3.01389	15.6	19.6	19.7	18.9	19.5	17.4	15.2	14.9
3.02083	15.6	19.6	19.7	18.9	19.5	17.4	15.2	14.8
3.02778	15.6	19.6	19.7	18.9	19.5	17.3	15.2	14.8
3.03472	15.6	19.5	19.7	18.9	19.5	17.3	15.3	14.9
3.04167	15.6	19.5	19.7	18.9	19.5	17.3	15.3	14.8
3.04861	15.6	19.5	19.7	18.9	19.5	17.3	15.3	14.9
3.05556	15.6	19.5	19.7	18.9	19.5	17.3	15.3	14.8
3.0625	15.6	19.5	19.7	18.9	19.5	17.2	15.3	14.4
3.06944	15.6	19.4	19.7	18.9	19.5	17.2	15.2	14.4
3.07639	15.6	19.4	19.7	18.9	19.5	17.2	15.2	14.4
3.08333	15.6	19.4	19.7	18.9	19.4	17.2	15.2	14.5
3.09028	15.6	19.4	19.7	18.9	19.4	17.2	15.2	14.6
3.09722	15.6	19.4	19.7	18.9	19.4	17.1	15.2	14.6
3.10417	15.6	19.3	19.7	18.9	19.4	17.1	15.2	14.7
3.11111	15.6	19.3	19.7	18.9	19.4	17.1	15.2	14.6
3.11806	15.6	19.3	19.6	18.9	19.4	17.1	15.2	14.7
3.125	15.6	19.3	19.6	18.9	19.4	17.1	15.2	14.6
3.13194	15.6	19.3	19.6	18.9	19.4	17.1	15.2	14.5
3.13889	15.6	19.3	19.6	18.9	19.4	17.1	15.1	14.5
3.14583	15.6	19.2	19.6	18.9	19.4	17.1	15.1	14.4
3.15278	15.5	19.2	19.6	18.9	19.4	17.1	15.1	14.4
3.15972	15.5	19.2	19.6	18.9	19.4	17.1	15.1	14.4
3.16667	15.5	19.2	19.6	18.8	19.4	17	15.1	14.7
3.17361	15.5	19.2	19.6	18.8	19.3	17	15.1	14.7
3.18056	15.5	19.1	19.6	18.8	19.3	17	15	14.7
3.1875	15.5	19.1	19.6	18.8	19.3	17	15	14.7
3.19444	15.5	19.1	19.5	18.8	19.3	17	15	14.8
3.20139	15.5	19.1	19.5	18.8	19.3	16.9	15	14.7
3.20833	15.5	19.1	19.5	18.8	19.3	16.9	15	14.7
3.21528	15.5	19	19.5	18.8	19.3	16.9	15	14.6
3.22222	15.5	19	19.5	18.8	19.3	16.9	15	14.7
3.22917	15.5	19	19.5	18.8	19.3	16.9	15	14.7
3.23611	15.5	19	19.5	18.8	19.3	16.9	15	14.8
3.24306	15.5	19	19.5	18.8	19.3	16.8	15	14.8
3.25	15.5	19	19.5	18.8	19.2	16.8	15	14.7
3.25694	15.5	18.9	19.4	18.8	19.2	16.8	15	14.7
3.26389	15.5	18.9	19.4	18.8	19.2	16.8	15.1	14.9
3.27083	15.5	18.9	19.4	18.7	19.2	16.8	15.1	15
3.27778	15.5	18.9	19.4	18.7	19.2	16.8	15.2	15
3.28472	15.5	18.9	19.4	18.7	19.2	16.7	15.2	15.2
3.29167	15.6	18.9	19.4	18.7	19.2	16.7	15.3	15.3
3.29861	15.8	18.8	19.4	18.7	19.2	16.7	15.4	15.5
3.30556	15.9	18.8	19.4	18.7	19.2	16.7	15.5	15.8
3.3125	16	18.8	19.4	18.7	19.2	16.7	15.6	16.1
3.31944	16.1	18.8	19.4	18.7	19.1	16.7	15.7	15.9
3.32639	16.2	18.8	19.3	18.7	19.1	16.7	15.8	16.2
3.33333	16.3	18.8	19.3	18.7	19.1	16.6	15.8	15.9
3.34028	16.4	18.7	19.3	18.7	19.1	16.6	15.9	16.1
3.34722	16.4	18.7	19.3	18.7	19.1	16.6	15.9	16.5
3.35417	16.5	18.7	19.3	18.7	19.1	16.6	16.1	16.9
3.36111	16.8	18.7	19.3	18.6	19.1	16.6	16.8	23.9
3.36806	17.2	18.7	19.3	18.6	19.1	16.6	17.8	19.5
3.375	17.7	18.7	19.3	18.6	19.1	16.6	18.3	22.5
3.38194	18.2	18.7	19.3	18.6	19.1	16.6	19.2	25.3
3.38889	18.8	18.6	19.2	18.6	19	16.6	20.1	26.4
3.39583	19.5	18.6	19.2	18.6	19	16.5	20.9	27.5
3.40278	20.2	18.6	19.2	18.6	19	16.5	21.7	28.8
3.40972	20.9	18.6	19.2	18.6	19	16.5	22.4	28.3
3.41667	21.7	18.6	19.2	18.6	19	16.5	23.1	29.6
3.42361	22.6	18.6	19.2	18.6	19	16.5	23.9	31.5
3.43056	23.5	18.6	19.2	18.6	19	16.5	24.7	34.4
3.4375	24.6	18.6	19.2	18.6	19	16.5	25.5	34.9
3.44444	25.7	18.6	19.2	18.6	19	16.5	26.1	30.4
3.45139	26.1	18.6	19.1	18.6	19	16.5	26.1	30.4
3.45833	26.2	18.6	19.1	18.5	18.9	16.5	26.4	35.3
3.46528	26.6	18.6	19.1	18.5	18.9	16.5	26.9	29.6
3.47222	26.8	18.6	19.1	18.5	18.9	16.5	26.6	29.3
3.47917	26.5	18.6	19.1	18.5	18.9	16.5	26.4	28.6
3.48611	26.2	18.6	19.1	18.5	18.9	16.5	26.2	29.4
3.49306	25.9	18.6	19.1	18.5	18.9	16.5	26.1	27.9
3.5	25.7	18.6	19.1	18.5	18.9	16.5	25.9	28.5
3.50694	25.5	18.6	19	18.5	18.9	16.6	25.9	28.9
3.51389	25.5	18.7	19	18.5	18.9	16.6	26.1	29.1
3.52083	25.7	18.7	19	18.5	18.8	16.6	26.1	28.4
3.52778	25.5	18.7	19	18.4	18.8	16.6	26.1	28.3
3.53472	25.5	18.7	19	18.4	18.8	16.6	26.1	28.6
3.54167	25.5	18.7	19	18.4	18.8	16.7	26.3	30.9
3.54861	25.9	18.8	19	18.4	18.8	16.7	26.5	30.7
3.55556	26.3	18.8	19	18.4	18.8	16.7	26.5	32
3.5625	26.6	18.8	19	18.4	18.8	16.7	26.6	31.4
3.56944	27.2	18.8	18.9	18.4	18.8	16.8	26.8	30.8
3.57639	27.8	18.9	18.9	18.4	18.8	16.8	26.6	30.9
3.58333	28.3	18.9	18.9	18.4	18.8	16.8	26.6	31.3
3.59028	28.7	18.9	18.9	18.4	18.7	16.9	26.5	30.4
3.59722	29.1	18.9	18.9	18.4	18.7	16.9	26.4	29.3
3.60417	29.6	19	18.9	18.4	18.7	16.9	26.4	30
3.61111	30	19	18.9	18.4	18.7	17	26.4	30.1
3.61806	30.4	19	18.9	18.3	18.7	17	26.2	29.2
3.625	30.7	19.1	18.9	18.3	18.7	17	26.2	28.3
3.63194	30.8	19.1	18.9	18.3	18.7	17.1	26.1	28.8
3.63889	31	19.1	18.9	18.3	18.7	17.1	26.1	28.1
3.64583	31.1	19.2	18.9	18.3	18.7	17.1	25.9	27.8
3.65278	31.3	19.2	18.9	18.3	18.7	17.1	25.9	28
3.65972	31.5	19.3	18.9	18.3	18.7	17.2	25.9	27.5
3.66667	31.5	19.3	18.9	18.3	18.7	17.2	25.9	27.5
3.67361	31.6	19.4	18.9	18.3	18.7	17.3	25.9	27.5
3.68056	31.7	19.4	18.9	18.3	18.7	17.3	25.8	27.4
3.6875	31.8	19.5	18.9	18.3	18.7	17.4	25.8	27.2
3.69444	32	19.5	18.9	18.3	18.7	17.4	25.8	27.1
3.70139	32	19.5	18.9	18.3	18.7	17.5	25.8	27.2
3.70833	32	19.6	18.9	18.3	18.7	17.6	25.7	26.5
3.71528	31.5	19.6	18.9	18.3	18.7	17.6	25.7	26
3.72222	30.7	19.7	18.9	18.3	18.7	17.7	25.5	25.6
3.72917	29.9	19.7	18.9	18.3	18.7	17.7	25.3	24.9
3.73611	28.9	19.8	18.9	18.3	18.7	17.8	25.1	25
3.74306	28	19.8	18.9	18.3	18.7	17.8	24.9	24.8
3.75	27.2	19.8	18.9	18.2	18.7	17.8	24.7	24.7
3.75694	26.6	19.9	18.9	18.2	18.7	17.9	24.6	24.6
3.76389	26.1	19.9	18.9	18.2	18.7	18	24.5	23.9
3.77083	25.5	20	18.9	18.2	18.7	18	24.3	23.6
3.77778	25.1	20	18.9	18.2	18.7	18	24.1	23.9
3.78472	24.7	20.1	18.9	18.2	18.7	18.1	24	23.7
3.79167	24.5	20.1	18.9	18.2	18.7	18.1	23.8	23.5
3.79861	24.2	20.1	18.9	18.2	18.7	18.2	23.7	23.2
3.80556	23.9	20.2	18.9	18.2	18.7	18.2	23.6	23
3.8125	23.7	20.2	19	18.2	18.7	18.2	23.5	22.9
3.81944	23.4	20.2	19	18.2	18.7	18.3	23.2	22.6
3.82639	23.2	20.3	19	18.2	18.7	18.3	23.1	22.5
3.83333	23	20.3	19	18.2	18.8	18.4	23	22.5
3.84028	22.8	20.3	19	18.2	18.8	18.4	22.9	22
3.84722	22.6	20.4	19	18.2	18.8	18.5	22.7	22.1
3.85417	22.5	20.4	19	18.3	18.8	18.5	22.6	22
3.86111	22.4	20.4	19	18.3	18.8	18.5	22.4	21.7
3.86806	22.2	20.5	19.1	18.3	18.8	18.6	22.3	21.6
3.875	22	20.5	19.1	18.3	18.8	18.6	22.3	21.4
3.88194	21.9	20.5	19.1	18.3	18.9	18.6	22.2	21.2
3.88889	21.8	20.5	19.1	18.3	18.9	18.6	22	21
3.89583	21.7	20.6	19.1	18.3	18.9	18.7	21.9	20.6
3.90278	21.6	20.6	19.1	18.3	18.9	18.7	21.8	20.1
3.90972	21.4	20.6	19.1	18.3	18.9	18.7	21.6	20.2
3.91667	21.3	20.6	19.2	18.3	19	18.8	21.5	19.8
3.92361	21	20.6	19.2	18.3	19	18.8	21.3	19.7
3.93056	20.9	20.6	19.2	18.3	19	18.8	21.1	19.4
3.9375	20.7	20.7	19.2	18.3	19	18.8	20.9	19.4
3.94444	20.5	20.7	19.2	18.3	19	18.8	20.8	19.2
3.95139	20.3	20.7	19.2	18.3	19.1	18.9	20.6	18.9
3.95833	20.2	20.7	19.3	18.3	19.1	18.9	20.5	18.8
3.96528	20	20.7	19.3	18.4	19.1	18.9	20.3	18.6
3.97222	19.8	20.7	19.3	18.4	19.1	18.9	20.2	18.5
3.97917	19.7	20.7	19.3	18.4	19.1	18.9	20.1	18.4
3.98611	19.6	20.7	19.3	18.4	19.2	18.9	19.9	18.3
3.99306	19.4	20.8	19.3	18.4	19.2	18.9	19.8	18.2
4	19.3	20.8	19.4	18.4	19.2	18.9	19.7	18.1
4.00694	19.1	20.8	19.4	18.4	19.2	18.9	19.6	18
4.01389	19	20.8	19.4	18.4	19.2	18.9	19.4	17.9
4.02083	18.9	20.8	19.4	18.4	19.3	18.9	19.3	17.8
4.02778	18.8	20.8	19.4	18.4	19.3	18.9	19.2	17.5
4.03472	18.7	20.8	19.5	18.5	19.3	18.9	19.1	17.4
4.04167	18.6	20.8	19.5	18.5	19.3	18.9	19	17.3
4.04861	18.5	20.8	19.5	18.5	19.4	18.9	18.9	17.3
4.05556	18.5	20.8	19.5	18.5	19.4	18.9	18.9	17.3
4.0625	18.5	20.8	19.5	18.5	19.4	18.9	18.7	17
4.06944	18.4	20.8	19.5	18.5	19.4	18.9	18.6	16.6
4.07639	18.3	20.8	19.6	18.5	19.4	18.9	18.5	16.7
4.08333	18.2	20.8	19.6	18.5	19.4	18.9	18.4	16.7
4.09028	18.2	20.8	19.6	18.5	19.5	18.9	18.3	16.9
4.09722	18.1	20.8	19.6	18.5	19.5	18.9	18.3	17
4.10417	18.1	20.8	19.6	18.6	19.5	18.9	18.3	16.9
4.11111	18	20.8	19.6	18.6	19.5	18.9	18.2	16.8
4.11806	18	20.8	19.6	18.6	19.5	18.9	18.2	16.9
4.125	18	20.8	19.7	18.6	19.6	18.9	18.2	17.1
4.13194	18	20.8	19.7	18.6	19.6	18.9	18.1	17
4.13889	18	20.8	19.7	18.6	19.6	18.8	18.1	16.4
4.14583	18	20.8	19.7	18.6	19.6	18.8	18	16.6
4.15278	17.9	20.7	19.7	18.6	19.6	18.8	18	16.6
4.15972	17.9	20.7	19.7	18.6	19.6	18.8	18	16.7
4.16667	17.9	20.7	19.7	18.7	19.6	18.8	17.9	16.4
4.17361	17.9	20.7	19.8	18.7	19.7	18.8	17.9	16.3
4.18056	17.8	20.7	19.8	18.7	19.7	18.8	17.8	16.4
4.1875	17.8	20.7	19.8	18.7	19.7	18.7	17.8	16.5
4.19444	17.8	20.7	19.8	18.7	19.7	18.7	17.7	16.3
4.20139	17.7	20.7	19.8	18.7	19.7	18.7	17.7	16.3
4.20833	17.7	20.7	19.8	18.7	19.7	18.7	17.6	16.3
4.21528	17.7	20.7	19.8	18.7	19.7	18.7	17.6	16.3
4.22222	17.6	20.7	19.8	18.7	19.7	18.7	17.5	16.3
4.22917	17.6	20.6	19.8	18.7	19.7	18.6	17.5	16.4
4.23611	17.5	20.6	19.8	18.8	19.8	18.6	17.5	16.4
4.24306	17.5	20.6	19.9	18.8	19.8	18.6	17.4	16.5
4.25	17.5	20.6	19.9	18.8	19.8	18.6	17.4	16.4
4.25694	17.5	20.6	19.9	18.8	19.8	18.6	17.4	16.6
4.26389	17.5	20.6	19.9	18.8	19.8	18.6	17.4	16.5
4.27083	17.5	20.6	19.9	18.8	19.8	18.5	17.4	16.8
4.27778	17.5	20.6	19.9	18.8	19.8	18.5	17.4	16.9
4.28472	17.6	20.6	19.9	18.8	19.8	18.5	17.4	16.9
4.29167	17.6	20.5	19.9	18.8	19.8	18.5	17.5	17.2
4.29861	17.7	20.5	19.9	18.8	19.8	18.5	17.5	17.3
4.30556	17.8	20.5	19.9	18.8	19.8	18.5	17.6	17.4
4.3125	17.9	20.5	19.9	18.8	19.8	18.4	17.6	17.6
4.31944	18	20.5	19.9	18.9	19.9	18.4	17.7	17.7
4.32639	18.1	20.5	19.9	18.9	19.9	18.4	17.8	17.9
4.33333	18.3	20.5	19.9	18.9	19.9	18.4	17.9	17.7
4.34028	18.4	20.5	19.9	18.9	19.9	18.3	18	18
4.34722	18.6	20.4	20	18.9	19.9	18.3	18.1	18.2
4.35417	18.7	20.4	20	18.9	19.9	18.3	18.3	18.6
4.36111	18.9	20.4	20	18.9	19.9	18.3	18.4	18.6
4.36806	19.1	20.4	20	18.9	19.9	18.3	18.6	19.1
4.375	19.3	20.4	20	18.9	19.9	18.3	18.9	19.6
4.38194	19.5	20.4	20	18.9	19.9	18.3	19.2	20.6
4.38889	19.8	20.4	20	18.9	19.9	18.2	19.7	21.9
4.39583	20.2	20.4	20	18.9	19.9	18.2	20.1	22
4.40278	20.5	20.4	20	18.9	19.9	18.2	20.4	22.5
4.40972	20.9	20.4	20	18.9	19.9	18.2	20.8	23.3
4.41667	21.3	20.3	20	18.9	19.9	18.2	21.2	23.6
4.42361	21.8	20.3	20	19	19.9	18.2	21.9	28.6
4.43056	22.7	20.3	20	19	19.9	18.2	23.1	28.6
4.4375	23.5	20.3	20	19	19.9	18.2	23.5	26.6
4.44444	24	20.3	20	19	19.9	18.2	23.6	25.8
4.45139	24.1	20.3	20	19	19.9	18.1	23.6	25.1
4.45833	24.1	20.3	20	19	19.9	18.1	23.6	29.1
4.46528	24.3	20.3	20	19	19.9	18.1	24.2	29.9
4.47222	24.9	20.3	20	19	19.9	18.1	25.2	32.8
4.47917	25.8	20.3	20	19	19.9	18.1	25.9	29
4.48611	26.5	20.3	20	19	19.9	18.1	26.3	29.6
4.49306	26.9	20.3	20	19	19.9	18.1	26.5	33.5
4.5	27.4	20.3	20	19	19.9	18.1	27.1	29.4
4.50694	27.8	20.3	20	19	19.9	18.1	27.1	30.8
4.51389	28.3	20.3	20	19	19.9	18.1	27.4	34.3
4.52083	28.9	20.4	20	19	19.9	18.1	27.8	33.6
4.52778	29.7	20.4	20	19	19.9	18.2	28.1	33.8
4.53472	30.2	20.4	20	19	19.9	18.1	28.3	34.2
4.54167	30.8	20.4	20	19	19.9	18.2	28.4	34
4.54861	31.3	20.4	20	19	19.9	18.2	28.6	34.4
4.55556	31.8	20.4	20	19	19.9	18.2	28.7	35.2
4.5625	32.4	20.5	20	19	19.9	18.2	28.9	33.1
4.56944	32.6	20.5	20	19	19.9	18.3	29.1	33
4.57639	32.8	20.5	20	19	19.9	18.3	29.1	31.3
4.58333	32.3	20.5	20	19	19.9	18.3	28.7	30.3
4.59028	31.6	20.5	20	19	19.9	18.3	28.7	31.8
4.59722	31.6	20.6	20	19	19.9	18.4	28.6	30.3
4.60417	31.6	20.6	20	19	19.9	18.4	28.6	30.7
4.61111	31.8	20.6	20	19	19.9	18.4	28.6	30.7
4.61806	32	20.7	20	19	19.9	18.5	28.4	31.3
4.625	32.4	20.7	20	19	19.9	18.5	28.4	29.9
4.63194	32.4	20.7	20	19	19.9	18.6	28.4	29.7
4.63889	32.4	20.8	20	19	19.9	18.6	28.3	30.4
4.64583	32.4	20.8	20	19.1	19.9	18.7	28.4	30.3
4.65278	32.4	20.9	20	19.1	19.9	18.7	28.4	31.5
4.65972	32.7	20.9	20	19.1	19.9	18.8	28.6	29.7
4.66667	32.6	20.9	20	19.1	19.9	18.8	28.6	28.7
4.67361	32	21	20	19.1	20	18.9	28.5	28.3
4.68056	31	21	20	19.1	19.9	18.9	28.4	28.7
4.6875	30.2	21	20	19.1	20	19	28.3	28.1
4.69444	29.7	21.2	20	19.1	20	19	28.1	27.8
4.70139	29.2	21.2	20	19.1	20	19.1	27.9	27.2
4.70833	28.6	21.2	20	19.1	20	19.1	27.7	26.8
4.71528	28	21.3	20	19.1	20	19.2	27.4	26.4
4.72222	27.4	21.3	20.1	19.1	20	19.2	27.1	26.2
4.72917	26.8	21.4	20.1	19.1	20	19.3	26.8	26
4.73611	26.4	21.4	20.1	19.1	20	19.3	26.5	25.9
4.74306	26	21.4	20.1	19.1	20	19.4	26.4	25.7
4.75	25.7	21.5	20.1	19.1	20	19.4	26.1	25.5
4.75694	25.4	21.5	20.1	19.1	20	19.5	25.9	25.3
4.76389	25.1	21.5	20.1	19.1	20	19.5	25.7	25
4.77083	24.9	21.6	20.1	19.1	20	19.6	25.5	24.5
4.77778	24.7	21.6	20.1	19.1	20	19.6	25.3	24.2
4.78472	24.5	21.6	20.1	19.1	20	19.7	25.1	23.9
4.79167	24.2	21.7	20.1	19.1	20.1	19.7	24.9	23.5
4.79861	24	21.7	20.2	19.1	20.1	19.7	24.7	23.3
4.80556	23.7	21.7	20.2	19.1	20.1	19.8	24.5	23.1
4.8125	23.6	21.8	20.2	19.1	20.1	19.8	24.2	22.9
4.81944	23.3	21.8	20.2	19.1	20.1	19.9	24.1	22.5
4.82639	23.1	21.8	20.2	19.2	20.1	19.9	23.8	22.4
4.83333	22.9	21.8	20.2	19.2	20.1	19.9	23.7	22.3
4.84028	22.7	21.9	20.2	19.2	20.2	20	23.5	22.1
4.84722	22.5	21.9	20.3	19.2	20.2	20	23.3	22
4.85417	22.3	21.9	20.3	19.2	20.2	20	23.1	21.5
4.86111	22.2	21.9	20.3	19.2	20.2	20	23	21.3
4.86806	22	21.9	20.3	19.2	20.2	20.1	22.7	21
4.875	21.8	22	20.3	19.2	20.2	20.1	22.6	20.6
4.88194	21.7	22	20.4	19.2	20.3	20.1	22.4	20.5
4.88889	21.6	22	20.4	19.3	20.3	20.1	22.2	20.2
4.89583	21.4	22	20.4	19.3	20.3	20.1	22	20.2
4.90278	21.3	22	20.4	19.3	20.3	20.1	21.9	20.2
4.90972	21.2	22	20.4	19.3	20.3	20.2	21.8	19.8
4.91667	20.9	22.1	20.4	19.3	20.4	20.2	21.6	19.6
4.92361	20.8	22.2	20.5	19.3	20.4	20.2	21.5	19.6
4.93056	20.7	22.2	20.5	19.3	20.4	20.2	21.4	19.4
4.9375	20.7	22.2	20.5	19.4	20.4	20.2	21.3	19.6
4.94444	20.6	22.2	20.5	19.4	20.5	20.2	21.2	19.6
4.95139	20.5	22.2	20.5	19.4	20.5	20.2	21.1	19.7
4.95833	20.4	22.2	20.6	19.4	20.5	20.2	21	19.4
4.96528	20.4	22.2	20.6	19.4	20.5	20.2	20.9	19.2
4.97222	20.3	22.2	20.6	19.4	20.5	20.2	20.8	18.9
4.97917	20.2	22.2	20.6	19.4	20.6	20.2	20.7	19.1
4.98611	20.1	22.2	20.6	19.5	20.6	20.2	20.6	19.1
4.99306	20	22.2	20.7	19.5	20.6	20.2	20.5	18.6
5	19.9	22.2	20.7	19.5	20.6	20.2	20.4	18.9
5.00694	19.9	22.2	20.7	19.5	20.6	20.2	20.3	18.7
5.01389	19.9	22.2	20.7	19.5	20.7	20.2	20.3	18.6
5.02083	19.8	22.2	20.7	19.5	20.7	20.2	20.2	18.6
5.02778	19.8	22.2	20.7	19.5	20.7	20.2	20.1	18.4
5.03472	19.7	22.2	20.8	19.6	20.7	20.2	20	18.4
5.04167	19.7	22.2	20.8	19.6	20.7	20.2	20	18.3
5.04861	19.6	22.2	20.8	19.6	20.7	20.2	19.9	18.4
5.05556	19.6	22.2	20.8	19.6	20.8	20.2	19.8	18.3
5.0625	19.5	22.2	20.8	19.6	20.8	20.2	19.8	18.1
5.06944	19.5	22.2	20.8	19.6	20.8	20.1	19.7	18
5.07639	19.4	22.2	20.9	19.6	20.8	20.1	19.6	18.2
5.08333	19.3	22.2	20.9	19.7	20.8	20.1	19.5	18
5.09028	19.2	22.2	20.9	19.7	20.8	20.1	19.5	18
5.09722	19.2	22.2	20.9	19.7	20.8	20.1	19.4	18
5.10417	19.1	22.2	20.9	19.7	20.9	20.1	19.3	18.2
5.11111	19.1	22.2	20.9	19.7	20.9	20.1	19.3	18.2
5.11806	19.1	22.2	20.9	19.7	20.9	20.1	19.3	18
5.125	19	22.2	21	19.7	20.9	20	19.2	17.9
5.13194	19	22.1	21	19.8	20.9	20	19.2	18
5.13889	19	22.1	21	19.8	20.9	20	19.1	17.9
5.14583	19	22.1	21	19.8	20.9	20	19.1	17.8
5.15278	18.9	22	21	19.8	21	20	19	17.6
5.15972	18.9	22	21	19.8	21	20	19	17.7
5.16667	18.8	22	21	19.8	21	19.9	18.9	17.7
5.17361	18.8	22	21	19.8	21	19.9	18.8	17.4
5.18056	18.7	22	21.1	19.8	21	19.9	18.8	17.4
5.1875	18.7	22	21.1	19.9	21	19.9	18.7	17.3
5.19444	18.6	22	21.2	19.9	21	19.9	18.6	17.2
5.20139	18.5	22	21.2	19.9	21	19.9	18.5	17.2
5.20833	18.5	22	21.2	19.9	21	19.8	18.4	17.2
5.21528	18.4	21.9	21.2	19.9	21	19.8	18.3	17.1
5.22222	18.3	21.9	21.2	19.9	21	19.8	18.3	17.2
5.22917	18.3	21.9	21.2	19.9	21.1	19.8	18.3	17.2
5.23611	18.2	21.9	21.2	19.9	21.2	19.8	18.2	17.2
5.24306	18.2	21.9	21.2	19.9	21.2	19.7	18.2	17
5.25	18.2	21.9	21.2	19.9	21.2	19.7	18.2	17.3
5.25694	18.2	21.9	21.2	20	21.2	19.7	18.2	17.2
5.26389	18.2	21.9	21.2	20	21.2	19.7	18.2	17.2
5.27083	18.2	21.8	21.2	20	21.2	19.7	18.2	17.2
5.27778	18.2	21.8	21.2	20	21.2	19.7	18.2	17.2
5.28472	18.2	21.8	21.3	20	21.2	19.6	18.2	17.7
5.29167	18.3	21.8	21.3	20	21.2	19.6	18.3	17.6
5.29861	18.4	21.8	21.3	20	21.2	19.6	18.3	18
5.30556	18.4	21.8	21.3	20	21.2	19.6	18.4	18.3
5.3125	18.5	21.8	21.3	20	21.2	19.6	18.5	18.4
5.31944	18.7	21.7	21.3	20	21.2	19.6	18.6	18.9
5.32639	18.9	21.7	21.3	20	21.2	19.5	18.8	19.6
5.33333	19.1	21.7	21.3	20.1	21.2	19.5	19	19.9
5.34028	19.4	21.7	21.3	20.1	21.2	19.5	19.3	20.2
5.34722	19.7	21.7	21.3	20.1	21.2	19.5	19.6	20.5
5.35417	19.9	21.7	21.3	20.1	21.2	19.5	19.8	20.6
5.36111	20.2	21.7	21.3	20.1	21.2	19.5	19.9	20.8
5.36806	20.4	21.7	21.3	20.1	21.2	19.4	20.2	21.5
5.375	20.7	21.6	21.3	20.1	21.2	19.4	20.4	21.8
5.38194	20.9	21.6	21.3	20.1	21.2	19.4	20.6	23.2
5.38889	21.3	21.6	21.3	20.1	21.2	19.4	21	23.7
5.39583	21.6	21.6	21.3	20.1	21.2	19.4	21.6	26.3
5.40278	22.1	21.6	21.3	20.1	21.3	19.4	22.4	27.1
5.40972	22.8	21.6	21.3	20.1	21.3	19.3	23.1	27.1
5.41667	23.6	21.6	21.3	20.1	21.3	19.3	23.7	29.1
5.42361	24.2	21.6	21.3	20.1	21.3	19.3	24.3	28.1
5.43056	24.7	21.6	21.3	20.1	21.3	19.3	24.9	31.5
5.4375	25.3	21.6	21.3	20.2	21.3	19.3	25.7	32.8
5.44444	26.1	21.6	21.3	20.2	21.3	19.3	26.5	34.3
5.45139	26.8	21.6	21.3	20.2	21.3	19.3	27.2	33.1
5.45833	27.5	21.6	21.3	20.2	21.3	19.3	27.8	34.2
5.46528	28.1	21.6	21.3	20.2	21.3	19.3	27.8	31.3
5.47222	28.4	21.6	21.3	20.2	21.3	19.3	28.1	35.2
5.47917	28.9	21.6	21.3	20.2	21.3	19.3	28.7	35.1
5.48611	29.7	21.6	21.3	20.2	21.3	19.3	29.2	35.4
5.49306	30.5	21.6	21.3	20.2	21.3	19.3	29.6	38.1
5.5	31.2	21.6	21.3	20.2	21.3	19.3	29.6	34.1
5.50694	31.3	21.6	21.3	20.2	21.2	19.3	29.4	32.6
5.51389	31.1	21.6	21.3	20.2	21.2	19.3	29.4	37.7
5.52083	31.5	21.6	21.3	20.2	21.2	19.3	29.9	39
5.52778	32.3	21.6	21.3	20.2	21.2	19.3	30.2	38.7
5.53472	33.1	21.7	21.3	20.2	21.2	19.4	30.4	36.2
5.54167	33.5	21.7	21.3	20.2	21.2	19.4	30.6	36.2
5.54861	33.9	21.7	21.3	20.2	21.2	19.4	30.7	36.6
5.55556	34.1	21.7	21.3	20.2	21.2	19.4	30.7	38.4
5.5625	34.7	21.7	21.3	20.2	21.2	19.4	30.9	37.5
5.56944	35.2	21.8	21.3	20.2	21.2	19.5	30.9	36.4
5.57639	35.4	21.8	21.3	20.2	21.2	19.5	30.9	36.1
5.58333	35.5	21.8	21.3	20.2	21.2	19.5	30.9	36.7
5.59028	35.6	21.8	21.3	20.2	21.2	19.6	30.7	35.4
5.59722	35.9	21.9	21.3	20.2	21.2	19.6	30.7	33.2
5.60417	35.9	21.9	21.3	20.2	21.2	19.7	30.7	34.2
5.61111	36.1	21.9	21.3	20.2	21.2	19.7	30.6	34.3
5.61806	36.1	22	21.3	20.2	21.2	19.8	30.6	34.3
5.625	36.3	22	21.3	20.2	21.2	19.8	30.6	33.2
5.63194	36.3	22.1	21.3	20.2	21.2	19.8	30.5	33.2
5.63889	36.3	22.2	21.3	20.2	21.2	19.9	30.4	32.2
5.64583	35.9	22.2	21.3	20.2	21.2	19.9	30.4	31.9
5.65278	35.6	22.3	21.3	20.2	21.2	20	30.6	32.2
5.65972	35.6	22.3	21.3	20.3	21.2	20.1	30.6	32.3
5.66667	35.4	22.4	21.3	20.3	21.2	20.1	30.7	31.9
5.67361	35	22.4	21.3	20.3	21.2	20.2	30.7	31.5
5.68056	34.6	22.4	21.3	20.3	21.2	20.2	30.6	30.4
5.6875	33.7	22.5	21.3	20.3	21.2	20.3	30.4	29.1
5.69444	32.6	22.5	21.3	20.3	21.2	20.3	30	28.5
5.70139	31.5	22.6	21.3	20.3	21.2	20.4	29.6	28
5.70833	30.4	22.6	21.3	20.3	21.2	20.4	29.2	27.7
5.71528	29.4	22.7	21.3	20.3	21.2	20.5	28.9	27.2
5.72222	28.7	22.7	21.3	20.3	21.2	20.5	28.7	27.2
5.72917	28.3	22.7	21.4	20.3	21.2	20.6	28.4	27
5.73611	27.8	22.9	21.4	20.3	21.3	20.7	28.1	26.7
5.74306	27.4	22.9	21.4	20.3	21.3	20.7	28	26.5
5.75	27.1	22.9	21.4	20.3	21.3	20.8	27.7	26.4
5.75694	26.8	23	21.4	20.3	21.3	20.8	27.5	26.3
5.76389	26.6	23	21.4	20.3	21.3	20.9	27.2	26
5.77083	26.4	23.1	21.4	20.3	21.3	20.9	27.1	25.8
5.77778	26.2	23.1	21.4	20.3	21.3	21	26.8	25.5
5.78472	25.9	23.1	21.4	20.3	21.3	21	26.6	25.4
5.79167	25.8	23.2	21.5	20.3	21.3	21	26.5	25.2
5.79861	25.7	23.2	21.5	20.3	21.3	21.2	26.4	24.9
5.80556	25.5	23.2	21.5	20.3	21.4	21.2	26.2	24.9
5.8125	25.3	23.3	21.5	20.4	21.4	21.2	25.9	24.3
5.81944	25.1	23.3	21.5	20.4	21.4	21.3	25.8	24.3
5.82639	24.9	23.3	21.5	20.4	21.4	21.3	25.7	23.8
5.83333	24.7	23.3	21.5	20.4	21.4	21.3	25.4	23.7
5.84028	24.6	23.3	21.6	20.4	21.4	21.4	25.3	23.6
5.84722	24.4	23.5	21.6	20.4	21.4	21.4	25.1	23.5
5.85417	24.2	23.5	21.6	20.4	21.5	21.4	25	23.3
5.86111	24.1	23.5	21.6	20.4	21.5	21.4	24.8	23.2
5.86806	24	23.5	21.6	20.4	21.5	21.5	24.7	23.1
5.875	23.9	23.5	21.7	20.5	21.5	21.5	24.6	23.2
5.88194	23.8	23.6	21.7	20.5	21.5	21.5	24.5	23.1
5.88889	23.7	23.6	21.7	20.5	21.6	21.5	24.3	22.9
5.89583	23.6	23.6	21.7	20.5	21.6	21.5	24.2	22.7
5.90278	23.6	23.6	21.7	20.5	21.6	21.5	24.2	22.6
5.90972	23.5	23.6	21.8	20.5	21.6	21.6	24.1	22.7
5.91667	23.3	23.6	21.8	20.5	21.6	21.6	24	22.6
5.92361	23.3	23.6	21.8	20.5	21.7	21.6	23.8	22
5.93056	23.2	23.7	21.8	20.6	21.7	21.6	23.6	21.1
5.9375	23	23.7	21.8	20.6	21.7	21.6	23.4	20.5
5.94444	22.8	23.7	21.8	20.6	21.7	21.6	23.2	19.8
5.95139	22.5	23.7	21.9	20.6	21.7	21.6	23	19.6
5.95833	22.3	23.7	21.9	20.6	21.7	21.6	22.7	20.1
5.96528	22	23.7	21.9	20.6	21.8	21.6	22.5	19.8
5.97222	21.8	23.7	21.9	20.7	21.8	21.6	22.3	19.6
5.97917	21.6	23.7	21.9	20.7	21.8	21.6	22	19.5
5.98611	21.4	23.7	22	20.7	21.8	21.6	21.9	19.3
5.99306	21.2	23.7	22	20.7	21.8	21.6	21.7	18.7
6	20.9	23.7	22	20.7	21.9	21.6	21.5	19
6.00694	20.7	23.7	22	20.7	21.9	21.6	21.3	19.1
6.01389	20.6	23.7	22	20.7	21.9	21.6	21.2	18.5
6.02083	20.4	23.7	22	20.7	21.9	21.6	21	18.4
6.02778	20.1	23.7	22.2	20.8	21.9	21.6	20.8	18.2
6.03472	19.7	23.7	22.2	20.8	21.9	21.6	20.6	18.7
6.04167	19.4	23.7	22.2	20.8	22	21.6	20.3	18.5
6.04861	19.2	23.7	22.2	20.8	22	21.6	20.2	18.4
6.05556	18.9	23.7	22.2	20.8	22	21.5	20	18.3
6.0625	18.7	23.7	22.2	20.8	22	21.5	19.9	18.4
6.06944	18.6	23.7	22.2	20.9	22	21.5	19.8	18.2
6.07639	18.5	23.7	22.3	20.9	22	21.5	19.8	18.7
6.08333	18.4	23.7	22.3	20.9	22.1	21.5	19.7	18.6
6.09028	18.5	23.7	22.3	20.9	22.2	21.5	19.7	17.8
6.09722	18.4	23.7	22.3	20.9	22.2	21.4	19.6	17.7
6.10417	18.4	23.6	22.3	20.9	22.2	21.4	19.5	18.2
6.11111	18.4	23.6	22.3	20.9	22.2	21.4	19.5	18.2
6.11806	18.4	23.6	22.4	20.9	22.2	21.4	19.4	18.1
6.125	18.4	23.6	22.4	21	22.2	21.3	19.4	18.1
6.13194	18.4	23.6	22.4	21	22.2	21.3	19.4	18.1
6.13889	18.4	23.6	22.4	21	22.3	21.3	19.4	18.3
6.14583	18.5	23.6	22.4	21	22.3	21.3	19.3	17.9
6.15278	18.5	23.6	22.4	21	22.3	21.2	19.3	18.2
6.15972	18.5	23.5	22.4	21	22.3	21.2	19.3	18.2
6.16667	18.6	23.5	22.4	21	22.3	21.2	19.3	18.3
6.17361	18.6	23.5	22.5	21.1	22.3	21.1	19.2	18.1
6.18056	18.6	23.5	22.5	21.1	22.3	21	19.2	18.1
6.1875	18.6	23.5	22.5	21.2	22.3	21	19.1	18
6.19444	18.6	23.5	22.5	21.2	22.3	21	19.1	18
6.20139	18.6	23.3	22.5	21.2	22.3	20.9	19	17.9
6.20833	18.6	23.3	22.5	21.2	22.4	20.9	19	18
6.21528	18.6	23.3	22.5	21.2	22.4	20.9	19	18.1
6.22222	18.6	23.3	22.5	21.2	22.4	20.9	19	18
6.22917	18.6	23.3	22.5	21.2	22.4	20.8	18.9	18
6.23611	18.6	23.3	22.5	21.2	22.4	20.8	18.9	18.3
6.24306	18.6	23.2	22.5	21.2	22.4	20.8	18.9	18.1
6.25	18.6	23.2	22.5	21.2	22.4	20.7	18.9	18.4
6.25694	18.7	23.2	22.6	21.3	22.4	20.7	18.9	18.1
6.26389	18.7	23.2	22.6	21.3	22.4	20.7	18.9	18.4
6.27083	18.8	23.2	22.6	21.3	22.4	20.7	18.9	18.5
6.27778	18.8	23.1	22.6	21.3	22.4	20.6	19	18.5
6.28472	18.9	23.1	22.6	21.3	22.4	20.6	19	18.8
6.29167	18.9	23.1	22.6	21.3	22.4	20.6	19.1	19.2
6.29861	19	23.1	22.6	21.3	22.4	20.6	19.2	19.3
6.30556	19.1	23.1	22.6	21.3	22.4	20.5	19.3	18.7
6.3125	19.3	23.1	22.6	21.3	22.4	20.5	19.3	19.2
6.31944	19.4	23	22.6	21.3	22.4	20.5	19.3	18.7
6.32639	19.5	23	22.6	21.3	22.4	20.5	19.4	19.1
6.33333	19.5	23	22.6	21.3	22.4	20.4	19.4	19.2
6.34028	19.7	23	22.6	21.3	22.4	20.4	19.5	19.3
6.34722	19.8	23	22.6	21.4	22.4	20.4	19.6	19.7
6.35417	20	22.9	22.6	21.4	22.4	20.4	19.7	19.9
6.36111	20.2	22.9	22.6	21.4	22.4	20.4	19.9	20.2
6.36806	20.4	22.9	22.6	21.4	22.4	20.3	20	20.6
6.375	20.6	22.9	22.6	21.4	22.4	20.3	20.2	20.6
6.38194	20.8	22.9	22.6	21.4	22.4	20.3	20.4	20.9
6.38889	21	22.9	22.6	21.4	22.4	20.3	20.5	21.1
6.39583	21.3	22.8	22.6	21.4	22.4	20.3	20.7	21.3
6.40278	21.4	22.7	22.6	21.4	22.4	20.2	20.8	21.5
6.40972	21.6	22.7	22.6	21.4	22.4	20.2	21	21.8
6.41667	21.7	22.7	22.6	21.4	22.4	20.2	21.3	22.2
6.42361	22	22.7	22.6	21.4	22.4	20.2	21.6	23.3
6.43056	22.3	22.7	22.6	21.4	22.4	20.2	22	24.2
6.4375	22.7	22.7	22.6	21.4	22.4	20.2	22.6	24.8
6.44444	23.2	22.7	22.6	21.4	22.4	20.1	23	24.5
6.45139	23.5	22.7	22.6	21.4	22.4	20.1	23.3	25.8
6.45833	23.9	22.7	22.6	21.4	22.4	20.1	24	27.7
6.46528	24.5	22.6	22.6	21.4	22.4	20.1	24.9	29.6
6.47222	25.4	22.6	22.6	21.4	22.4	20.1	25.8	30.8
6.47917	26.2	22.6	22.6	21.4	22.4	20.1	26.4	31.6
6.48611	26.9	22.6	22.6	21.4	22.4	20.1	26.8	30
6.49306	27.5	22.6	22.6	21.4	22.4	20.1	27.2	32.6
6.5	28.4	22.6	22.6	21.4	22.4	20.1	28	31.3
6.50694	29.5	22.6	22.6	21.4	22.4	20.1	28.1	28.1
6.51389	29.6	22.6	22.5	21.4	22.3	20.1	28.3	31.3
6.52083	29.7	22.6	22.5	21.4	22.3	20.1	28.4	30.4
6.52778	29.9	22.6	22.5	21.4	22.3	20.1	28.6	29.7
6.53472	29.9	22.6	22.5	21.4	22.3	20.1	28.6	29.2
6.54167	29.8	22.6	22.5	21.4	22.3	20.1	28.6	29.2
6.54861	29.7	22.6	22.5	21.4	22.3	20.1	28.6	29.2
6.55556	29.7	22.6	22.5	21.4	22.3	20.1	28.6	29.5
6.5625	29.8	22.6	22.5	21.4	22.3	20.1	28.7	29.7
6.56944	30	22.6	22.5	21.4	22.3	20.1	28.7	28.3
6.57639	30	22.7	22.5	21.4	22.3	20.1	28.6	28.1
6.58333	30	22.7	22.5	21.4	22.3	20.1	28.6	29.1
6.59028	30	22.7	22.5	21.4	22.3	20.1	28.6	27.7
6.59722	29.7	22.7	22.5	21.4	22.3	20.2	28.3	26.8
6.60417	29	22.7	22.5	21.4	22.3	20.2	28	27.1
6.61111	28.6	22.7	22.5	21.4	22.3	20.2	27.8	27.2
6.61806	28.5	22.7	22.5	21.4	22.3	20.2	27.8	26.9
6.625	28.5	22.8	22.5	21.4	22.3	20.3	27.8	27.2
6.63194	28.7	22.9	22.5	21.4	22.3	20.3	27.7	26.6
6.63889	28.7	22.9	22.5	21.4	22.2	20.3	27.7	26.6
6.64583	28.7	22.9	22.5	21.4	22.2	20.3	27.5	26.4
6.65278	28.6	22.9	22.5	21.4	22.2	20.4	27.4	26.4
6.65972	28.4	22.9	22.4	21.4	22.2	20.4	27.4	26.5
6.66667	28.3	23	22.4	21.4	22.2	20.4	27.2	25.9
6.67361	27.9	23	22.4	21.4	22.2	20.4	27.1	26.5
6.68056	27.4	23	22.4	21.4	22.2	20.5	27.1	26.2
6.6875	27.1	23	22.4	21.4	22.2	20.5	26.9	26.3
6.69444	26.9	23	22.4	21.4	22.2	20.5	26.9	26.5
6.70139	26.8	23.1	22.4	21.4	22.2	20.5	26.9	26.6
6.70833	26.6	23.1	22.4	21.4	22.2	20.6	26.9	26.9
6.71528	26.5	23.1	22.4	21.4	22.2	20.6	26.8	26.6
6.72222	26.4	23.1	22.4	21.4	22.2	20.6	26.7	26.1
6.72917	26.2	23.1	22.4	21.4	22.2	20.7	26.5	26.2
6.73611	25.9	23.2	22.4	21.4	22.2	20.7	26.4	25.9
6.74306	25.8	23.2	22.4	21.4	22.2	20.7	26.3	26.1
6.75	25.7	23.2	22.4	21.4	22.2	20.7	26.1	24.6
6.75694	25.4	23.2	22.4	21.4	22.2	20.8	25.9	24.1
6.76389	25	23.2	22.4	21.4	22.2	20.8	25.7	23.6
6.77083	24.7	23.3	22.4	21.4	22.2	20.8	25.3	22.2
6.77778	24.2	23.3	22.4	21.4	22.2	20.8	24.2	21.3
6.78472	23.6	23.3	22.5	21.4	22.2	20.9	23.6	22.3
6.79167	23.1	23.3	22.5	21.4	22.2	20.9	23.5	22
6.79861	22.7	23.3	22.5	21.4	22.2	20.9	23.2	21.6
6.80556	22.5	23.3	22.5	21.4	22.2	20.9	23.1	21.1
6.8125	22.4	23.3	22.5	21.4	22.3	20.9	22.8	20.9
6.81944	22.2	23.3	22.5	21.4	22.3	20.9	22.6	21.4
6.82639	22.1	23.4	22.5	21.4	22.3	20.9	22.6	20.8
6.83333	22	23.5	22.5	21.4	22.3	21	22.5	20.8
6.84028	21.9	23.5	22.5	21.4	22.3	21	22.4	20.6
6.84722	21.8	23.5	22.5	21.4	22.3	21	22.3	20.7
6.85417	21.7	23.5	22.5	21.4	22.3	21	22.2	20.6
6.86111	21.6	23.5	22.5	21.4	22.3	21	22.2	20.5
6.86806	21.5	23.5	22.5	21.4	22.3	21	22	20.2
6.875	21.4	23.5	22.5	21.4	22.3	21	21.9	20.2
6.88194	21.2	23.5	22.5	21.4	22.3	21	21.8	19.9
6.88889	21	23.5	22.5	21.4	22.3	21	21.7	19.6
6.89583	20.9	23.5	22.5	21.4	22.3	21	21.5	19.4
6.90278	20.8	23.5	22.6	21.4	22.4	21	21.3	19
6.90972	20.6	23.5	22.6	21.5	22.4	21	20.7	18.8
6.91667	20.3	23.5	22.6	21.5	22.4	21	20.2	18.4
6.92361	20	23.5	22.6	21.5	22.4	21	20	18.5
6.93056	19.8	23.5	22.6	21.5	22.4	21	19.9	18.6
6.9375	19.7	23.5	22.6	21.5	22.4	21	19.9	18.7
6.94444	19.6	23.5	22.6	21.5	22.4	21	19.8	18.7
6.95139	19.6	23.5	22.6	21.5	22.4	21	19.8	18.7
6.95833	19.5	23.5	22.6	21.5	22.4	21	19.8	18.6
6.96528	19.5	23.5	22.6	21.5	22.4	21	19.8	18.5
6.97222	19.5	23.5	22.6	21.5	22.4	21	19.7	18.2
6.97917	19.5	23.5	22.6	21.5	22.5	21	19.7	18.2
6.98611	19.5	23.5	22.6	21.5	22.5	21	19.7	18
6.99306	19.5	23.5	22.7	21.5	22.5	21	19.6	18.1
7	19.5	23.5	22.7	21.5	22.5	21	19.5	18
7.00694	19.4	23.5	22.7	21.5	22.5	20.9	19.5	17.9
7.01389	19.4	23.5	22.7	21.5	22.5	20.9	19.4	18
7.02083	19.4	23.4	22.7	21.5	22.5	20.9	19.4	17.8
7.02778	19.4	23.4	22.7	21.5	22.5	20.9	19.4	17.9
7.03472	19.3	23.3	22.7	21.5	22.5	20.9	19.3	17.8
7.04167	19.3	23.3	22.7	21.5	22.5	20.9	19.3	17.6
7.04861	19.3	23.3	22.7	21.6	22.5	20.8	19.2	17.5
7.05556	19.2	23.3	22.7	21.6	22.5	20.8	19	17.1
7.0625	19.1	23.3	22.7	21.6	22.5	20.8	18.6	16.6
7.06944	18.9	23.3	22.7	21.6	22.5	20.8	18.2	16.4
7.07639	18.6	23.3	22.7	21.6	22.6	20.8	18	16.1
7.08333	18.3	23.3	22.7	21.6	22.6	20.8	17.7	15.9
7.09028	18.1	23.2	22.7	21.6	22.6	20.7	17.5	15.9
7.09722	18	23.2	22.7	21.6	22.6	20.7	17.3	15.9
7.10417	18	23.2	22.7	21.6	22.6	20.7	17.2	15.8
7.11111	17.9	23.2	22.8	21.6	22.6	20.7	17.1	15.6
7.11806	17.8	23.2	22.7	21.6	22.6	20.7	17.1	15.7
7.125	17.8	23.2	22.8	21.6	22.6	20.7	17	15.7
7.13194	17.8	23.2	22.8	21.6	22.6	20.6	17	15.9
7.13889	17.8	23.1	22.8	21.6	22.6	20.6	17	16
7.14583	17.8	23.1	22.9	21.6	22.6	20.6	17.1	16.2
7.15278	17.8	23.1	22.9	21.6	22.6	20.6	17.2	16.4
7.15972	17.8	23.1	22.9	21.6	22.6	20.5	17.2	16.4
7.16667	17.8	23.1	22.9	21.6	22.6	20.5	17.3	16.4
7.17361	17.8	23.1	22.9	21.6	22.6	20.5	17.3	16.5
7.18056	17.8	23	22.9	21.6	22.6	20.5	17.4	16.7
7.1875	17.9	23	22.9	21.6	22.6	20.4	17.4	16.6
7.19444	17.9	23	22.9	21.6	22.6	20.4	17.4	16.6
7.20139	17.9	23	22.9	21.6	22.6	20.4	17.4	16.6
7.20833	17.9	23	22.9	21.6	22.6	20.4	17.5	16.6
7.21528	17.9	22.9	22.9	21.6	22.6	20.3	17.5	16.4
7.22222	17.9	22.9	22.9	21.6	22.6	20.3	17.5	16.4
7.22917	17.9	22.9	22.9	21.6	22.6	20.3	17.5	16.3
7.23611	17.9	22.9	22.9	21.6	22.6	20.3	17.4	16.4
7.24306	17.9	22.9	22.9	21.6	22.6	20.2	17.4	16.4
7.25	17.9	22.8	22.9	21.6	22.6	20.2	17.4	16.3
7.25694	17.8	22.7	22.8	21.6	22.6	20.2	17.1	15.4
7.26389	17.5	22.7	22.8	21.6	22.6	20.2	16.8	15.1
7.27083	17.3	22.7	22.8	21.6	22.6	20.1	16.6	15.4
7.27778	17.1	22.7	22.7	21.6	22.6	20.1	16.5	15.3
7.28472	17.1	22.7	22.7	21.6	22.6	20.1	16.5	15.4
7.29167	17	22.6	22.7	21.6	22.6	20.1	16.4	15.5
7.29861	17	22.6	22.7	21.6	22.6	20	16.5	15.9
7.30556	17	22.6	22.7	21.6	22.6	20	16.5	16
7.3125	17	22.6	22.7	21.6	22.6	20	16.5	16
7.31944	17.1	22.5	22.7	21.6	22.6	20	16.5	16
7.32639	17.1	22.5	22.7	21.6	22.6	19.9	16.6	16
7.33333	17.2	22.5	22.7	21.6	22.6	19.9	16.6	16.1
7.34028	17.3	22.5	22.7	21.6	22.6	19.9	16.7	16.3
7.34722	17.4	22.5	22.7	21.6	22.5	19.9	16.7	16.3
7.35417	17.5	22.4	22.7	21.6	22.5	19.8	16.8	16.4
7.36111	17.6	22.4	22.7	21.6	22.5	19.8	16.8	16.3
7.36806	17.7	22.4	22.7	21.6	22.5	19.8	16.8	16.2
7.375	17.8	22.4	22.7	21.6	22.5	19.8	16.9	16.4
7.38194	18	22.4	22.7	21.6	22.5	19.7	17	16.6
7.38889	18	22.3	22.7	21.6	22.5	19.7	17.1	16.8
7.39583	18.2	22.3	22.7	21.6	22.5	19.7	17.1	16.9
7.40278	18.2	22.3	22.6	21.6	22.5	19.7	17.1	17
7.40972	18.3	22.3	22.6	21.6	22.5	19.6	17.1	16.6
7.41667	18.2	22.2	22.6	21.6	22.5	19.6	17.1	16.3
7.42361	18	22.2	22.6	21.6	22.5	19.6	16.9	16.4
7.43056	17.8	22.2	22.6	21.6	22.5	19.6	17	17
7.4375	17.8	22.2	22.6	21.6	22.5	19.5	17.2	17.5
7.44444	17.9	22.2	22.6	21.6	22.4	19.5	17.5	18
7.45139	18	22.1	22.6	21.6	22.4	19.5	17.8	18.3
7.45833	18.2	22	22.6	21.6	22.4	19.5	18	18.8
7.46528	18.5	22	22.6	21.6	22.4	19.4	18.2	19.2
7.47222	18.9	22	22.6	21.6	22.4	19.4	18.8	20.5
7.47917	19.6	22	22.6	21.6	22.4	19.4	19.4	21.9
7.48611	20.3	22	22.5	21.6	22.4	19.4	19.9	21.4
7.49306	20.7	22	22.5	21.6	22.4	19.3	20.2	22.3
7.5	21	21.9	22.5	21.5	22.4	19.3	20.7	24.5
7.50694	21.9	21.9	22.5	21.5	22.4	19.3	21.4	25.7
7.51389	22.9	21.9	22.5	21.5	22.4	19.3	21.8	23.8
7.52083	23.5	21.9	22.5	21.5	22.4	19.3	22.1	23.3
7.52778	23.7	21.9	22.5	21.5	22.3	19.3	22.4	24.8
7.53472	24.3	21.9	22.5	21.5	22.3	19.2	23	27.1
7.54167	25.4	21.9	22.5	21.5	22.3	19.2	23.4	25.9
7.54861	26.3	21.9	22.5	21.5	22.3	19.2	23.6	26.5
7.55556	26.9	21.8	22.4	21.5	22.3	19.2	23.7	24.3
7.5625	27.4	21.8	22.4	21.5	22.3	19.2	23.8	26.2
7.56944	27.9	21.8	22.4	21.5	22.3	19.2	24	25.1
7.57639	28.4	21.8	22.4	21.5	22.3	19.2	24.2	25.5
7.58333	28.6	21.8	22.4	21.5	22.3	19.2	24.2	24.4
7.59028	28.1	21.8	22.4	21.5	22.3	19.2	24.1	24
7.59722	27.4	21.8	22.4	21.5	22.2	19.1	24.1	24.7
7.60417	26.9	21.8	22.4	21.5	22.2	19.1	24	23.1
7.61111	26.2	21.8	22.4	21.4	22.2	19.1	23.6	22.5
7.61806	25.3	21.8	22.3	21.4	22.2	19.1	23	18.9
7.625	23.3	21.8	22.3	21.4	22.2	19.1	21.4	18.2
7.63194	21.7	21.8	22.3	21.4	22.2	19.2	20.6	17.6
7.63889	20.5	21.8	22.3	21.4	22.2	19.2	20	17.4
7.64583	19.8	21.8	22.3	21.4	22.1	19.2	19.7	17.6
7.65278	19.4	21.8	22.3	21.4	22	19.2	19.4	18.1
7.65972	19.2	21.8	22.3	21.4	22	19.2	19.2	18
7.66667	19.1	21.8	22.2	21.4	22	19.2	19	17.4
7.67361	18.9	21.8	22.2	21.4	22	19.2	18.7	16.8
7.68056	18.7	21.8	22.2	21.3	22	19.2	18.3	15.9
7.6875	18.5	21.8	22.2	21.3	22	19.2	17.9	15.8
7.69444	18.3	21.8	22.2	21.3	22	19.2	17.6	15.5
7.70139	18.2	21.8	22.2	21.3	22	19.2	17.4	15.7
7.70833	18.1	21.8	22.2	21.3	22	19.2	17.3	15.8
7.71528	18.1	21.8	22.2	21.3	22	19.2	17.2	16.1
7.72222	18.2	21.8	22.2	21.3	21.9	19.2	17.4	16.6
7.72917	18.3	21.8	22.2	21.3	21.9	19.2	17.6	16.9
7.73611	18.3	21.8	22.1	21.3	21.9	19.2	17.7	17.2
7.74306	18.4	21.8	22	21.3	21.9	19.2	17.9	17.4
7.75	18.5	21.8	22	21.3	21.9	19.2	18	17.5
7.75694	18.6	21.8	22	21.3	21.9	19.2	18	17.6
7.76389	18.7	21.8	22	21.2	21.9	19.2	18	17.7
7.77083	18.7	21.8	22	21.2	21.9	19.2	18	17.3
7.77778	18.7	21.8	22	21.2	21.9	19.2	18	17.4
7.78472	18.7	21.8	22	21.2	21.9	19.2	18	17.3
7.79167	18.6	21.8	22	21.2	21.9	19.2	18	17.3
7.79861	18.6	21.8	22	21.2	21.9	19.2	18	17.1
7.80556	18.5	21.8	22	21.2	21.9	19.2	18	16.9
7.8125	18.4	21.8	22	21.2	21.8	19.2	17.9	17
7.81944	18.3	21.8	22	21.2	21.8	19.1	17.8	16.8
7.82639	18.2	21.7	22	21.2	21.8	19.1	17.7	16.8
7.83333	18.1	21.7	22	21.2	21.8	19.1	17.7	16.6
7.84028	18	21.7	22	21.2	21.8	19.1	17.6	16.6
7.84722	17.9	21.7	21.9	21.2	21.8	19.1	17.5	16.5
7.85417	17.9	21.7	21.9	21.1	21.8	19.1	17.5	16.5
7.86111	17.8	21.7	21.9	21.1	21.8	19.1	17.5	16.4
7.86806	17.8	21.7	21.9	21.1	21.8	19.1	17.4	16.6
7.875	17.8	21.7	21.9	21	21.8	19	17.4	16.5
7.88194	17.8	21.7	21.9	21	21.8	19	17.4	16.4
7.88889	17.7	21.6	21.9	21	21.8	19	17.3	16.3
7.89583	17.7	21.6	21.9	21	21.8	19	17.3	16.3
7.90278	17.7	21.6	21.9	21	21.8	19	17.3	16.1
7.90972	17.7	21.6	21.9	21	21.8	19	17.2	16.1
7.91667	17.6	21.6	21.9	21	21.8	19	17.2	16
7.92361	17.6	21.6	21.9	21	21.7	19	17.1	16.1
7.93056	17.6	21.6	21.9	21	21.7	19	17.1	16.1
7.9375	17.5	21.6	21.9	21	21.7	18.9	17.1	16.2
7.94444	17.5	21.5	21.9	21	21.7	18.9	17.1	16.1
7.95139	17.5	21.5	21.8	21	21.7	18.9	17.1	16.1
7.95833	17.5	21.5	21.8	21	21.7	18.9	17.1	16
7.96528	17.5	21.5	21.8	21	21.7	18.9	17.1	16.2
7.97222	17.4	21.5	21.8	21	21.7	18.9	17	16.2
7.97917	17.4	21.5	21.8	20.9	21.7	18.8	17	16.2
7.98611	17.4	21.5	21.8	20.9	21.7	18.8	17	16.4
7.99306	17.4	21.4	21.8	20.9	21.7	18.8	17	16.4
8	17.4	21.4	21.8	20.9	21.7	18.8	17	15.6
8.00694	17.2	21.4	21.8	20.9	21.7	18.8	16.7	15.6
8.01389	17.1	21.4	21.8	20.9	21.6	18.8	16.4	15.4
8.02083	16.8	21.4	21.8	20.9	21.6	18.7	16.3	15.5
8.02778	16.7	21.4	21.8	20.9	21.6	18.7	16.1	15.2
8.03472	16.5	21.3	21.8	20.9	21.6	18.7	16	15.1
8.04167	16.5	21.3	21.7	20.9	21.6	18.7	15.9	15
8.04861	16.4	21.3	21.7	20.9	21.6	18.7	15.9	14.8
8.05556	16.4	21.3	21.7	20.9	21.6	18.7	15.7	14.8
8.0625	16.3	21.3	21.7	20.8	21.6	18.6	15.6	14.9
8.06944	16.3	21.3	21.7	20.8	21.6	18.6	15.5	14.8
8.07639	16.2	21.2	21.7	20.8	21.6	18.6	15.5	14.7
8.08333	16.1	21.2	21.7	20.8	21.6	18.6	15.5	14.7
8.09028	16.1	21.2	21.7	20.8	21.5	18.6	15.4	14.4
8.09722	16.1	21.2	21.7	20.8	21.5	18.6	15.3	14.7
8.10417	16	21.2	21.7	20.8	21.5	18.5	15.3	14.8
8.11111	16	21.1	21.7	20.8	21.5	18.5	15.3	14.9
8.11806	16.1	21	21.6	20.8	21.5	18.5	15.3	14.6
8.125	16	21	21.6	20.8	21.5	18.5	15.2	14.5
8.13194	16	21	21.6	20.8	21.5	18.5	15.2	14.5
8.13889	16	21	21.6	20.8	21.5	18.4	15.1	14.5
8.14583	15.9	21	21.6	20.8	21.5	18.4	15.1	14.5
8.15278	15.9	20.9	21.6	20.7	21.5	18.4	15.1	14.5
8.15972	15.9	20.9	21.6	20.7	21.4	18.4	15	14.4
8.16667	15.9	20.9	21.6	20.7	21.4	18.3	15	14.4
8.17361	15.9	20.9	21.6	20.7	21.4	18.3	15	14.4
8.18056	15.8	20.9	21.5	20.7	21.4	18.3	15	14.4
8.1875	15.8	20.8	21.5	20.7	21.4	18.3	15	14.4
8.19444	15.7	20.8	21.5	20.7	21.4	18.3	14.9	14.2
8.20139	15.7	20.8	21.5	20.7	21.4	18.2	14.8	14.1
8.20833	15.6	20.8	21.5	20.7	21.4	18.2	14.7	14
8.21528	15.6	20.8	21.5	20.7	21.4	18.2	14.7	13.8
8.22222	15.5	20.7	21.5	20.7	21.3	18.2	14.6	13.7
8.22917	15.5	20.7	21.5	20.6	21.3	18.2	14.6	13.8
8.23611	15.5	20.7	21.5	20.6	21.3	18.1	14.6	14
8.24306	15.5	20.7	21.4	20.6	21.3	18.1	14.7	14.1
8.25	15.5	20.6	21.4	20.6	21.3	18.1	14.7	14.3
8.25694	15.5	20.6	21.4	20.6	21.3	18.1	14.8	14.4
8.26389	15.6	20.6	21.4	20.6	21.3	18	14.8	14.4
8.27083	15.6	20.6	21.4	20.6	21.3	18	14.8	14.6
8.27778	15.6	20.6	21.4	20.6	21.2	18	14.8	14.4
8.28472	15.6	20.5	21.4	20.6	21.2	18	14.8	14.2
8.29167	15.5	20.5	21.4	20.5	21.2	18	14.7	14.1
8.29861	15.5	20.5	21.3	20.5	21.2	18	14.7	14.2
8.30556	15.5	20.5	21.3	20.5	21.2	18	14.7	14.2
8.3125	15.4	20.4	21.3	20.5	21.2	18	14.7	14.3
8.31944	15.5	20.4	21.3	20.5	21.2	17.9	14.7	14.5
8.32639	15.5	20.4	21.3	20.5	21.2	17.9	14.8	14.3
8.33333	15.5	20.4	21.3	20.5	21.1	17.9	14.8	14.3
8.34028	15.5	20.4	21.3	20.5	21	17.9	14.7	14.4
8.34722	15.5	20.3	21.2	20.5	21	17.8	14.7	14.5
8.35417	15.5	20.3	21.2	20.4	21	17.8	14.7	14.7
8.36111	15.5	20.3	21.2	20.4	21	17.8	14.8	15.2
8.36806	15.6	20.3	21.2	20.4	21	17.8	15	15.6
8.375	15.7	20.2	21.2	20.4	21	17.8	15.2	16.1
8.38194	15.9	20.2	21.2	20.4	21	17.7	15.5	16.6
8.38889	16	20.2	21.2	20.4	20.9	17.7	15.9	16.9
8.39583	16.4	20.2	21.1	20.4	20.9	17.7	16.1	17.1
8.40278	16.8	20.2	21	20.4	20.9	17.7	16.4	17.2
8.40972	17.1	20.1	21	20.4	20.9	17.6	16.5	17.6
8.41667	17.2	20.1	21	20.4	20.9	17.6	16.7	17.6
8.42361	17.3	20.1	21	20.3	20.9	17.6	16.8	17.6
8.43056	17.2	20.1	21	20.3	20.9	17.6	17	17.9
8.4375	17.3	20.1	21	20.3	20.8	17.5	17.1	18.4
8.44444	17.3	20	21	20.3	20.8	17.5	17.4	18.8
8.45139	17.5	20	20.9	20.3	20.8	17.5	17.6	19.1
8.45833	17.7	20	20.9	20.3	20.8	17.5	17.8	19.2
8.46528	18	20	20.9	20.3	20.8	17.5	18	19
8.47222	18.3	20	20.9	20.3	20.8	17.4	18.1	19.2
8.47917	18.5	20	20.9	20.2	20.7	17.4	18.3	19.2
8.48611	18.6	19.9	20.9	20.2	20.7	17.4	18.4	18.5
8.49306	18.4	19.9	20.8	20.2	20.7	17.4	18.4	18.3
8.5	18	19.9	20.8	20.2	20.7	17.4	18.4	18.5
8.50694	17.7	19.9	20.8	20.2	20.7	17.4	18.3	18.8
8.51389	17.5	19.9	20.8	20.2	20.7	17.3	18.2	18.1
8.52083	17.4	19.9	20.8	20.2	20.6	17.3	18.2	18.7
8.52778	17.6	19.8	20.8	20.1	20.6	17.3	18.2	18.8
8.53472	17.9	19.8	20.7	20.1	20.6	17.3	18.2	18.8
8.54167	18.1	19.8	20.7	20.1	20.6	17.3	18.2	18.9
8.54861	18.5	19.8	20.7	20.1	20.6	17.3	18.3	18.5
8.55556	19	19.8	20.7	20.1	20.6	17.3	18.3	19.1
8.5625	19.7	19.8	20.7	20.1	20.6	17.3	18.8	20.3
8.56944	20.7	19.8	20.7	20.1	20.5	17.3	19.3	20.3
8.57639	21.4	19.8	20.7	20.1	20.5	17.3	19.5	20.5
8.58333	21.6	19.8	20.6	20	20.5	17.3	19.7	21
8.59028	21.8	19.8	20.6	20	20.5	17.3	20	21.4
8.59722	22.2	19.7	20.6	20	20.5	17.3	20.2	21.6
8.60417	22.3	19.7	20.6	20	20.5	17.3	20.3	21.5
8.61111	22.2	19.7	20.6	20	20.5	17.2	20.4	21.7
8.61806	21.9	19.7	20.6	20	20.4	17.2	20.5	21.8
8.625	21.9	19.7	20.5	20	20.4	17.2	20.6	21.8
8.63194	21.8	19.7	20.5	20	20.4	17.2	20.7	21.7
8.63889	21.7	19.7	20.5	19.9	20.4	17.2	20.7	20.7
8.64583	21.6	19.7	20.5	19.9	20.4	17.2	20.4	20.8
8.65278	21.4	19.7	20.5	19.9	20.4	17.2	20.5	20.5
8.65972	21.2	19.7	20.5	19.9	20.3	17.3	20.5	20.9
8.66667	21	19.7	20.4	19.9	20.3	17.2	20.6	20.8
8.67361	20.9	19.7	20.4	19.9	20.3	17.3	20.5	20.8
8.68056	20.8	19.7	20.4	19.9	20.3	17.3	20.3	19.6
8.6875	20.3	19.7	20.4	19.8	20.3	17.3	19.6	18.2
8.69444	19.8	19.7	20.4	19.8	20.3	17.3	19.3	19.3
8.70139	19.8	19.7	20.4	19.8	20.2	17.3	19.4	19.5
8.70833	19.9	19.7	20.4	19.8	20.2	17.3	19.5	19.1
8.71528	19.8	19.7	20.3	19.8	20.2	17.3	19.4	19.3
8.72222	19.7	19.7	20.3	19.8	20.2	17.3	19.3	19.2
8.72917	19.6	19.7	20.3	19.8	20.2	17.3	19.3	19.2
8.73611	19.5	19.7	20.3	19.7	20.2	17.3	19.2	18.2
8.74306	19.3	19.7	20.3	19.7	20.2	17.3	18.9	17.9
8.75	19.1	19.7	20.3	19.7	20.1	17.3	18.6	17.7
8.75694	18.8	19.7	20.3	19.7	20.1	17.4	18.3	17.9
8.76389	18.5	19.7	20.2	19.7	20.1	17.4	18.1	16.8
8.77083	18.2	19.8	20.2	19.7	20.1	17.4	17.7	16.2
8.77778	17.9	19.8	20.2	19.7	20.1	17.4	17.3	16.2
8.78472	17.6	19.7	20.2	19.6	20.1	17.4	17.1	16.1
8.79167	17.2	19.8	20.2	19.6	20.1	17.4	17	16.2
8.79861	17.1	19.8	20.2	19.6	20.1	17.4	16.9	16
8.80556	16.9	19.7	20.2	19.6	20	17.4	16.8	16.1
8.8125	16.8	19.8	20.2	19.6	20	17.4	16.7	16.2
8.81944	16.7	19.7	20.1	19.6	20	17.4	16.7	16.3
8.82639	16.7	19.7	20.1	19.6	20	17.4	16.7	16.3
8.83333	16.7	19.7	20.1	19.6	20	17.4	16.6	16.2
8.84028	16.6	19.7	20.1	19.6	20	17.4	16.6	16.2
8.84722	16.6	19.7	20.1	19.5	20	17.4	16.6	16.2
8.85417	16.6	19.7	20.1	19.5	20	17.4	16.5	16.2
8.86111	16.6	19.7	20.1	19.5	20	17.4	16.5	16
8.86806	16.5	19.7	20.1	19.5	20	17.4	16.4	16
8.875	16.5	19.7	20.1	19.5	19.9	17.4	16.4	16.1
8.88194	16.5	19.7	20.1	19.5	19.9	17.4	16.4	15.9
8.88889	16.5	19.7	20.1	19.5	19.9	17.4	16.3	15.9
8.89583	16.4	19.7	20.1	19.5	19.9	17.4	16.2	15.6
8.90278	16.4	19.7	20	19.5	19.9	17.4	16.1	15.6
8.90972	16.4	19.7	20	19.4	19.9	17.4	16	15.5
8.91667	16.4	19.7	20	19.4	19.9	17.4	16	15.8
8.92361	16.4	19.7	20	19.4	19.9	17.4	16.1	15.9
8.93056	16.3	19.7	20	19.4	19.9	17.4	16.1	15.7
8.9375	16.3	19.7	20	19.4	19.9	17.4	16.1	15.8
8.94444	16.2	19.6	20	19.4	19.9	17.4	16.1	15.7
8.95139	16.1	19.6	20	19.4	19.9	17.4	16.1	15.9
8.95833	16.1	19.6	20	19.4	19.9	17.4	16.1	15.8
8.96528	16.1	19.6	20	19.4	19.9	17.4	16	15.6
8.97222	16	19.6	20	19.4	19.9	17.4	15.9	15.5
8.97917	16	19.6	20	19.4	19.8	17.4	15.8	15.5
8.98611	16	19.6	20	19.4	19.8	17.3	15.8	15.6
8.99306	16	19.6	19.9	19.3	19.8	17.3	15.8	15.5
9	16	19.6	19.9	19.3	19.8	17.3	15.7	15.5
9.00694	15.9	19.5	19.9	19.3	19.8	17.3	15.7	15.5
9.01389	15.9	19.5	19.9	19.3	19.8	17.3	15.6	15.4
9.02083	15.9	19.5	19.9	19.3	19.8	17.3	15.6	15.2
9.02778	15.8	19.5	19.9	19.3	19.8	17.3	15.5	15.1
9.03472	15.7	19.5	19.9	19.3	19.8	17.3	15.4	15
9.04167	15.6	19.5	19.9	19.3	19.8	17.3	15.3	15
9.04861	15.6	19.5	19.9	19.3	19.8	17.2	15.2	14.8
9.05556	15.5	19.5	19.9	19.3	19.8	17.2	15.1	14.8
9.0625	15.5	19.4	19.9	19.3	19.8	17.2	15	15
9.06944	15.5	19.4	19.9	19.2	19.7	17.2	15	15
9.07639	15.5	19.4	19.9	19.2	19.7	17.2	15	15
9.08333	15.4	19.4	19.8	19.2	19.7	17.2	15.1	15
9.09028	15.5	19.4	19.8	19.2	19.7	17.2	15.1	15
9.09722	15.4	19.4	19.8	19.2	19.7	17.1	15	15
9.10417	15.5	19.3	19.8	19.2	19.7	17.1	15	14.8
9.11111	15.4	19.3	19.8	19.2	19.7	17.1	15	14.6
9.11806	15.4	19.3	19.8	19.2	19.7	17.1	15	14.5
9.125	15.4	19.3	19.8	19.2	19.7	17.1	14.9	14.5
9.13194	15.4	19.3	19.8	19.2	19.7	17.1	14.9	14.6
9.13889	15.4	19.3	19.8	19.2	19.7	17.1	14.9	14.6
9.14583	15.3	19.3	19.8	19.2	19.7	17.1	14.8	14.4
9.15278	15.3	19.2	19.8	19.1	19.6	17.1	14.7	14.4
9.15972	15.2	19.2	19.7	19.1	19.6	17.1	14.7	14.4
9.16667	15.1	19.2	19.7	19.1	19.6	17.1	14.6	14.4
9.17361	15.1	19.2	19.7	19.1	19.6	17.1	14.7	14.5
9.18056	15.1	19.2	19.7	19.1	19.6	17	14.7	14.5
9.1875	15.1	19.2	19.7	19.1	19.6	17	14.7	14.4
9.19444	15.1	19.1	19.7	19.1	19.6	17	14.7	14.4
9.20139	15.1	19.1	19.7	19.1	19.6	17	14.7	14.5
9.20833	15.1	19.1	19.7	19.1	19.6	17	14.7	14.4
9.21528	15	19.1	19.7	19.1	19.6	17	14.7	14.4
9.22222	15	19.1	19.7	19.1	19.5	16.9	14.6	14.4
9.22917	15	19	19.6	19	19.5	16.9	14.6	14.4
9.23611	15	19	19.6	19	19.5	16.9	14.5	14.4
9.24306	15	19	19.6	19	19.5	16.9	14.5	14.4
9.25	15	19	19.6	19	19.5	16.9	14.6	14.5
9.25694	15	19	19.6	19	19.5	16.9	14.6	14.4
9.26389	15.1	19	19.6	19	19.5	16.8	14.6	14.4
9.27083	15.1	18.9	19.6	19	19.5	16.8	14.6	14.4
9.27778	15.2	18.9	19.6	19	19.5	16.8	14.6	14.5
9.28472	15.2	18.9	19.6	19	19.4	16.8	14.7	14.4
9.29167	15.2	18.9	19.5	19	19.4	16.8	14.7	14.6
9.29861	15.3	18.9	19.5	18.9	19.4	16.7	14.8	14.7
9.30556	15.3	18.9	19.5	18.9	19.4	16.7	14.9	14.9
9.3125	15.4	18.8	19.5	18.9	19.4	16.7	15	15.3
9.31944	15.5	18.8	19.5	18.9	19.4	16.7	15.2	15.5
9.32639	15.7	18.8	19.5	18.9	19.4	16.7	15.3	15.8
9.33333	15.9	18.8	19.5	18.9	19.4	16.7	15.5	15.9
9.34028	16.1	18.8	19.5	18.9	19.4	16.6	15.7	16.4
9.34722	16.3	18.8	19.5	18.9	19.3	16.6	15.9	16.5
9.35417	16.5	18.7	19.4	18.9	19.3	16.6	16	16.5
9.36111	16.7	18.7	19.4	18.9	19.3	16.6	16.2	17.1
9.36806	16.9	18.7	19.4	18.9	19.3	16.6	16.4	17.8
9.375	17.2	18.7	19.4	18.8	19.3	16.5	16.8	18.2
9.38194	17.5	18.7	19.4	18.8	19.3	16.5	17.1	19.5
9.38889	17.9	18.7	19.4	18.8	19.3	16.5	17.6	19.9
9.39583	18.3	18.7	19.4	18.8	19.3	16.5	18	20
9.40278	18.6	18.6	19.4	18.8	19.2	16.5	18.2	19.8
9.40972	18.9	18.6	19.4	18.8	19.2	16.5	18.4	20
9.41667	19.2	18.6	19.3	18.8	19.2	16.5	18.6	20.2
9.42361	19.4	18.6	19.3	18.8	19.2	16.5	18.7	20
9.43056	19.7	18.6	19.3	18.8	19.2	16.4	19	21.2
9.4375	20	18.6	19.3	18.8	19.2	16.5	19.3	21.6
9.44444	20.3	18.6	19.3	18.8	19.2	16.4	19.5	21.2
9.45139	20.5	18.6	19.3	18.7	19.2	16.4	19.6	21.7
9.45833	20.7	18.6	19.3	18.7	19.1	16.4	19.9	21.5
9.46528	21	18.6	19.3	18.7	19.1	16.4	20	21.2
9.47222	21	18.6	19.2	18.7	19.1	16.4	20	21.6
9.47917	21.2	18.6	19.2	18.7	19.1	16.4	20.1	20.9
9.48611	21	18.6	19.2	18.7	19.1	16.4	20	21.2
9.49306	21	18.6	19.2	18.7	19.1	16.4	20.2	21.6
9.5	21.2	18.5	19.2	18.7	19.1	16.4	20.4	21.3
9.50694	21.2	18.6	19.2	18.7	19.1	16.4	20.5	21.6
9.51389	21.2	18.6	19.2	18.6	19	16.4	20.6	21.7
9.52083	21.1	18.6	19.1	18.6	19	16.4	20.7	21.8
9.52778	21	18.6	19.1	18.6	19	16.4	20.8	21.8
9.53472	21	18.6	19.1	18.6	19	16.4	20.8	21.6
9.54167	21	18.6	19.1	18.6	19	16.4	20.9	22.2
9.54861	21	18.6	19.1	18.6	19	16.4	20.9	22.3
9.55556	21	18.6	19.1	18.6	19	16.4	21	21.9
9.5625	21	18.6	19.1	18.6	18.9	16.4	20.9	22
9.56944	21.1	18.6	19.1	18.6	18.9	16.4	20.9	21
9.57639	21	18.6	19	18.5	18.9	16.5	20.7	20.5
9.58333	20.7	18.6	19	18.5	18.9	16.5	20.3	20.3
9.59028	20.7	18.6	19	18.5	18.9	16.5	20.4	21.7
9.59722	21.5	18.6	19	18.5	18.9	16.5	20.8	22.6
9.60417	22.7	18.6	19	18.5	18.9	16.5	21.3	23.1
9.61111	23.8	18.6	19	18.5	18.9	16.5	21.6	23.7
9.61806	24.7	18.7	19	18.5	18.9	16.5	21.9	24.1
9.625	25.3	18.7	19	18.5	18.9	16.6	22.2	23.8
9.63194	25.5	18.7	19	18.5	18.8	16.6	22.4	24
9.63889	25.5	18.7	19	18.5	18.8	16.6	22.4	23.5
9.64583	25.3	18.7	18.9	18.4	18.8	16.6	22.5	23.7
9.65278	25	18.7	18.9	18.4	18.8	16.6	22.5	23.1
9.65972	24.6	18.7	18.9	18.4	18.8	16.6	22.4	22.6
9.66667	24.1	18.7	18.9	18.4	18.8	16.6	22.3	22.5
9.67361	23.5	18.8	18.9	18.4	18.8	16.7	22.1	22.6
9.68056	23.1	18.8	18.9	18.4	18.8	16.7	22	22.3
9.6875	22.7	18.8	18.9	18.4	18.8	16.7	21.8	21.5
9.69444	22.4	18.8	18.9	18.4	18.8	16.7	21.6	21.5
9.70139	22	18.8	18.9	18.4	18.8	16.8	21.5	21.2
9.70833	21.5	18.8	18.9	18.3	18.7	16.8	21.3	20.2
9.71528	20.9	18.9	18.9	18.3	18.7	16.8	21	19.7
9.72222	20.4	18.9	18.8	18.3	18.7	16.8	20.7	18.9
9.72917	19.9	18.9	18.8	18.3	18.7	16.8	20.4	19.4
9.73611	19.6	18.9	18.8	18.3	18.7	16.9	20.2	19
9.74306	19.3	18.9	18.8	18.3	18.7	16.9	19.8	18.3
9.75	18.9	18.9	18.8	18.3	18.7	16.9	19.2	16.8
9.75694	18.5	18.9	18.8	18.3	18.7	16.9	18.6	16.6
9.76389	18.1	19	18.8	18.3	18.7	17	18.2	16.4
9.77083	17.8	19	18.8	18.3	18.7	17	18	16.2
9.77778	17.6	19	18.8	18.3	18.7	17	17.7	15.9
9.78472	17.4	19	18.8	18.2	18.7	17	17.3	15.8
9.79167	17.1	19	18.8	18.2	18.7	17	17.1	15.9
9.79861	17	19	18.8	18.2	18.7	17.1	17	15.9
9.80556	16.9	19	18.8	18.2	18.7	17.1	16.8	15.5
9.8125	16.7	19	18.8	18.2	18.7	17.1	16.6	15.4
9.81944	16.6	19	18.8	18.2	18.7	17.1	16.4	15.2
9.82639	16.4	19	18.8	18.2	18.7	17.1	16.2	14.9
9.83333	16.4	19.1	18.8	18.2	18.7	17.1	15.9	14.7
9.84028	16.3	19.1	18.8	18.2	18.7	17.1	15.8	14.6
9.84722	16.2	19.1	18.8	18.2	18.7	17.1	15.7	14.6
9.85417	16.1	19.1	18.8	18.2	18.7	17.1	15.5	14.5
9.86111	16	19.1	18.8	18.2	18.7	17.1	15.5	14.7
9.86806	16	19.1	18.8	18.2	18.7	17.1	15.5	14.7
9.875	15.9	19.1	18.8	18.2	18.7	17.1	15.5	15
9.88194	15.9	19.1	18.8	18.2	18.7	17.1	15.5	15
9.88889	15.9	19.1	18.8	18.2	18.7	17.1	15.5	14.9
9.89583	15.9	19.1	18.8	18.2	18.7	17.1	15.4	14.8
9.90278	15.9	19.1	18.8	18.2	18.7	17.1	15.3	15
9.90972	15.8	19.1	18.8	18.2	18.7	17.1	15.4	15
9.91667	15.8	19.1	18.8	18.2	18.7	17.1	15.5	15
9.92361	15.8	19.1	18.8	18.2	18.7	17.1	15.5	15.1
9.93056	15.8	19	18.8	18.2	18.7	17.1	15.5	15.2
9.9375	15.9	19	18.8	18.2	18.7	17.1	15.6	15.3
9.94444	15.9	19	18.8	18.2	18.7	17.1	15.6	15
9.95139	15.9	19	18.8	18.1	18.7	17.1	15.5	14.7
9.95833	15.8	19	18.8	18.2	18.7	17.1	15.3	14.6
9.96528	15.8	19	18.8	18.1	18.7	17.1	15.2	14.4
9.97222	15.7	19	18.8	18.1	18.7	17	15	14.3
9.97917	15.6	19	18.8	18.1	18.7	17	15	14.3
9.98611	15.6	19	18.8	18.1	18.7	17	14.9	14.2
9.99306	15.5	19	18.8	18.1	18.7	17	14.9	14.1
10	15.5	19	18.8	18.1	18.7	17	14.8	14
10.0069	15.5	18.9	18.8	18.1	18.7	17	14.7	14.1
10.0139	15.5	18.9	18.8	18.1	18.7	17	14.7	14.1
10.0208	15.4	18.9	18.8	18.1	18.7	17	14.7	14.1
10.0278	15.4	18.9	18.8	18.1	18.7	16.9	14.7	14.1
10.0347	15.4	18.9	18.8	18.1	18.7	16.9	14.7	14
10.0417	15.4	18.9	18.8	18.1	18.7	16.9	14.6	14
10.0486	15.3	18.9	18.8	18.1	18.7	16.9	14.6	14
10.0556	15.3	18.9	18.8	18.1	18.7	16.9	14.5	13.9
10.0625	15.2	18.8	18.8	18.1	18.7	16.9	14.4	13.8
10.0694	15.2	18.8	18.8	18.1	18.7	16.8	14.4	13.9
10.0764	15.1	18.8	18.8	18.1	18.7	16.8	14.4	13.9
10.0833	15.1	18.8	18.8	18.1	18.7	16.8	14.4	14
10.0903	15	18.8	18.8	18.1	18.7	16.8	14.4	14
10.0972	15	18.8	18.8	18.1	18.7	16.8	14.4	14.2
10.1042	15.1	18.8	18.8	18.1	18.7	16.8	14.4	14.1
10.1111	15	18.7	18.8	18.1	18.7	16.7	14.4	14.1
10.1181	15	18.7	18.8	18.1	18.7	16.7	14.4	14.1
10.125	15	18.7	18.8	18.1	18.7	16.7	14.4	14
10.1319	15	18.7	18.8	18.1	18.7	16.7	14.4	14
10.1389	15	18.7	18.8	18.1	18.7	16.7	14.4	14
10.1458	15	18.7	18.8	18.1	18.7	16.6	14.4	13.9
10.1528	15	18.6	18.8	18.1	18.7	16.6	14.4	14
10.1597	15	18.6	18.8	18.1	18.7	16.6	14.4	14.1
10.1667	15	18.6	18.8	18.1	18.7	16.6	14.5	14.3
10.1736	15	18.6	18.8	18.1	18.7	16.6	14.5	14.3
10.1806	15	18.6	18.8	18.1	18.6	16.5	14.5	14.4
10.1875	15	18.6	18.8	18.1	18.6	16.5	14.6	14.4
10.1944	15	18.6	18.8	18.1	18.6	16.5	14.6	14.4
10.2014	15	18.5	18.7	18.1	18.6	16.5	14.6	14.4
10.2083	15	18.5	18.7	18	18.6	16.5	14.6	14.4
10.2153	15	18.5	18.7	18	18.6	16.4	14.6	14.4
10.2222	15	18.5	18.7	18	18.6	16.4	14.6	14.4
10.2292	15	18.5	18.7	18	18.6	16.4	14.6	14.4
10.2361	15	18.4	18.7	18	18.6	16.4	14.6	14.3
10.2431	15	18.4	18.7	18	18.6	16.4	14.6	14.4
10.25	15	18.4	18.7	18	18.6	16.4	14.6	14.3
10.2569	15	18.4	18.7	18	18.6	16.4	14.6	14.4
10.2639	15	18.4	18.7	18	18.6	16.4	14.6	14.4
10.2708	15	18.3	18.7	18	18.6	16.4	14.7	14.6
10.2778	15.1	18.3	18.7	18	18.5	16.3	14.7	14.6
10.2847	15.2	18.3	18.7	18	18.5	16.3	14.8	14.7
10.2917	15.3	18.3	18.7	18	18.5	16.3	14.9	15
10.2986	15.5	18.3	18.6	18	18.5	16.3	15	15.2
10.3056	15.6	18.3	18.6	18	18.5	16.3	15.1	15.3
10.3125	15.7	18.3	18.6	18	18.5	16.3	15.2	15.3
10.3194	15.9	18.2	18.6	18	18.5	16.2	15.3	15.5
10.3264	15.9	18.2	18.6	18	18.5	16.2	15.4	15.5
10.3333	16	18.2	18.6	18	18.5	16.2	15.5	15.9
10.3403	16.2	18.2	18.6	18	18.5	16.2	15.6	15.9
10.3472	16.4	18.2	18.6	18	18.5	16.2	15.8	16.6
10.3542	16.5	18.2	18.6	18	18.5	16.2	16	16.9
10.3611	16.8	18.1	18.6	18	18.5	16.1	16.3	17.5
10.3681	17.1	18.1	18.6	18	18.4	16.1	16.6	18.3
10.375	17.5	18.1	18.6	18	18.4	16.1	17	18.6
10.3819	17.9	18.1	18.6	18	18.4	16.1	17.2	18.5
10.3889	18.1	18.1	18.5	18	18.4	16.1	17.5	18.9
10.3958	18.4	18.1	18.5	18	18.4	16.1	17.8	19.2
10.4028	18.8	18.1	18.5	18	18.4	16.1	18	19.5
10.4097	19.1	18.1	18.5	18	18.4	16	18.3	20.1
10.4167	19.4	18.1	18.5	18	18.4	16	18.6	21.3
10.4236	19.8	18.1	18.5	18	18.4	16	19	21.9
10.4306	20.4	18.1	18.5	18	18.4	16	19.7	25.5
10.4375	21.2	18.1	18.5	17.9	18.4	16	20.3	23.6
10.4444	21.7	18	18.5	17.9	18.4	16	20.7	26.5
10.4514	22.5	18	18.5	17.9	18.3	16	21.5	26.4
10.4583	23.5	18	18.5	17.9	18.3	16	22.3	27
10.4653	24.3	18	18.5	17.9	18.3	16	23	28.7
10.4722	25.4	18	18.4	17.9	18.3	16	23.8	29.9
10.4792	26.5	18.1	18.4	17.9	18.3	16	24.5	28.4
10.4861	27.2	18.1	18.4	17.9	18.3	16	24.4	26.5
10.4931	27.4	18.1	18.4	17.9	18.3	16	24.3	26.6
10.5	27.1	18.1	18.4	17.9	18.3	16	24.7	28
10.5069	27.4	18.1	18.4	17.9	18.3	16	25.1	28.4
10.5139	27.7	18.1	18.4	17.9	18.3	16	25.4	26.2
10.5208	27.7	18.1	18.4	17.9	18.3	16	25.1	24.9
10.5278	27.1	18.1	18.3	17.8	18.2	16	24.7	24.2
10.5347	26.1	18.1	18.3	17.8	18.2	16.1	24.5	24.2
10.5417	25.3	18.1	18.3	17.8	18.2	16.1	24.2	24
10.5486	24.6	18.2	18.3	17.8	18.2	16.1	24.1	23.6
10.5556	24	18.2	18.3	17.8	18.2	16.1	23.8	23.2
10.5625	23.5	18.2	18.3	17.8	18.2	16.1	23.7	22.4
10.5694	23	18.2	18.3	17.8	18.2	16.2	23.5	22.6
10.5764	22.5	18.2	18.3	17.8	18.2	16.2	23.3	22.6
10.5833	22.2	18.3	18.3	17.8	18.2	16.2	23.1	22.5
10.5903	21.9	18.3	18.3	17.8	18.1	16.2	23	21.8
10.5972	21.7	18.3	18.2	17.8	18.1	16.3	22.7	22.2
10.6042	21.5	18.3	18.2	17.7	18.1	16.3	22.6	22
10.6111	21.3	18.4	18.2	17.7	18.1	16.3	22.5	21.5
10.6181	21.1	18.4	18.2	17.7	18.1	16.4	22.3	21.1
10.625	20.8	18.4	18.2	17.7	18.1	16.4	21.9	20
10.6319	20.5	18.4	18.2	17.7	18.1	16.4	21	18.6
10.6389	19.9	18.4	18.2	17.7	18.1	16.4	20.2	18.5
10.6458	19.3	18.5	18.2	17.7	18.1	16.4	19.6	17.3
10.6528	18.7	18.5	18.2	17.7	18.1	16.4	19.1	17.2
10.6597	18.3	18.5	18.2	17.7	18.1	16.4	18.8	17.6
10.6667	18.1	18.5	18.2	17.7	18.1	16.5	18.8	17.6
10.6736	18	18.5	18.2	17.7	18.1	16.5	18.8	18
10.6806	17.9	18.6	18.2	17.7	18.1	16.5	18.8	18.4
10.6875	17.9	18.6	18.2	17.7	18.1	16.5	18.9	18.7
10.6944	18	18.6	18.2	17.7	18.1	16.5	19	18.8
10.7014	18.1	18.6	18.2	17.7	18.1	16.6	19	18.7
10.7083	18.2	18.6	18.2	17.6	18.1	16.6	19	18.8
10.7153	18.2	18.6	18.2	17.6	18.1	16.6	19	18.6
10.7222	18.1	18.7	18.2	17.6	18.1	16.6	18.9	18.2
10.7292	18	18.7	18.2	17.6	18.1	16.6	18.8	18.1
10.7361	17.8	18.7	18.2	17.6	18.1	16.6	18.7	18.3
10.7431	17.7	18.7	18.2	17.6	18.1	16.6	18.7	18.3
10.75	17.6	18.7	18.2	17.6	18.1	16.6	18.6	18.4
10.7569	17.6	18.7	18.2	17.6	18.1	16.7	18.6	18.4
10.7639	17.5	18.7	18.2	17.6	18.1	16.7	18.6	18
10.7708	17.5	18.7	18.2	17.6	18.1	16.7	18.5	18.1
10.7778	17.5	18.7	18.2	17.6	18.1	16.7	18.4	17.9
10.7847	17.4	18.7	18.2	17.6	18.1	16.7	18.3	17.5
10.7917	17.3	18.7	18.2	17.6	18.1	16.7	18.2	17.2
10.7986	17.2	18.8	18.2	17.6	18.1	16.7	18	17.2
10.8056	17.1	18.8	18.2	17.6	18.1	16.7	17.8	17.1
10.8125	16.9	18.8	18.2	17.6	18.1	16.7	17.5	17
10.8194	16.8	18.8	18.2	17.6	18.1	16.7	17.4	17
10.8264	16.6	18.8	18.2	17.6	18.1	16.7	17.2	16.6
10.8333	16.6	18.8	18.2	17.6	18.1	16.7	17.1	16.7
10.8403	16.5	18.8	18.2	17.6	18.1	16.7	17	16.5
10.8472	16.4	18.8	18.2	17.6	18.1	16.7	16.9	16.4
10.8542	16.4	18.8	18.3	17.6	18.1	16.7	16.9	16.4
10.8611	16.4	18.8	18.3	17.6	18.1	16.7	16.8	16.3
10.8681	16.3	18.8	18.3	17.6	18.1	16.7	16.7	16.2
10.875	16.3	18.8	18.3	17.6	18.1	16.7	16.6	16.2
10.8819	16.2	18.8	18.3	17.6	18.1	16.7	16.5	16.1
10.8889	16.2	18.8	18.3	17.6	18.1	16.7	16.4	15.8
10.8958	16.1	18.8	18.3	17.6	18.1	16.7	16.3	15.7
10.9028	16.1	18.7	18.3	17.6	18.1	16.7	16.2	15.9
10.9097	16.1	18.7	18.3	17.6	18.1	16.7	16.2	16
10.9167	16	18.7	18.3	17.6	18.1	16.7	16.3	16.1
10.9236	16	18.7	18.3	17.6	18.1	16.6	16.3	16.1
10.9306	16	18.7	18.3	17.6	18.1	16.6	16.3	15.9
10.9375	15.9	18.7	18.3	17.6	18.1	16.6	16.2	15.8
10.9444	15.9	18.7	18.3	17.6	18.1	16.6	16.1	15.9
10.9514	15.9	18.7	18.3	17.6	18.1	16.6	16	15.8
10.9583	15.8	18.7	18.3	17.6	18.2	16.6	16	15.7
10.9653	15.8	18.7	18.3	17.6	18.2	16.6	15.9	15.6
10.9722	15.8	18.7	18.3	17.6	18.2	16.6	15.9	15.4
10.9792	15.7	18.7	18.3	17.6	18.2	16.6	15.7	15.1
10.9861	15.7	18.7	18.3	17.6	18.2	16.6	15.6	14.9
10.9931	15.6	18.7	18.3	17.6	18.2	16.5	15.5	14.8
11	15.6	18.6	18.3	17.6	18.2	16.5	15.4	14.6
11.0069	15.5	18.6	18.3	17.6	18.2	16.5	15.3	14.6
11.0139	15.5	18.6	18.3	17.6	18.2	16.5	15.1	14.4
11.0208	15.5	18.6	18.3	17.6	18.2	16.5	15	14.3
11.0278	15.4	18.6	18.4	17.6	18.2	16.5	15	14.3
11.0347	15.3	18.6	18.3	17.6	18.2	16.5	14.9	14.4
11.0417	15.3	18.6	18.3	17.6	18.1	16.5	14.8	14.4
11.0486	15.2	18.6	18.4	17.6	18.2	16.5	14.8	14.3
11.0556	15.2	18.6	18.4	17.6	18.1	16.4	14.8	14.3
11.0625	15.1	18.5	18.3	17.6	18.1	16.4	14.7	14.3
11.0694	15.1	18.5	18.4	17.6	18.1	16.4	14.7	14.3
11.0764	15.1	18.5	18.4	17.6	18.1	16.4	14.7	14.3
11.0833	15	18.5	18.4	17.6	18.1	16.4	14.7	14.3
11.0903	15	18.5	18.4	17.6	18.1	16.4	14.7	14.1
11.0972	15	18.5	18.4	17.6	18.1	16.4	14.6	14.3
11.1042	15	18.5	18.3	17.6	18.1	16.4	14.6	14.3
11.1111	15	18.4	18.3	17.6	18.1	16.4	14.6	14.1
11.1181	15	18.4	18.3	17.6	18.1	16.4	14.6	14.3
11.125	15	18.4	18.3	17.6	18.1	16.4	14.5	14
11.1319	15	18.4	18.3	17.6	18.1	16.3	14.4	13.9
11.1389	15	18.4	18.3	17.6	18.1	16.3	14.4	13.8
11.1458	14.9	18.4	18.3	17.6	18.1	16.3	14.4	13.7
11.1528	14.9	18.4	18.3	17.6	18.1	16.3	14.3	13.7
11.1597	14.9	18.3	18.3	17.6	18.1	16.3	14.2	13.7
11.1667	14.8	18.3	18.3	17.6	18.1	16.2	14.2	13.7
11.1736	14.8	18.3	18.3	17.6	18.1	16.2	14.2	13.7
11.1806	14.8	18.3	18.3	17.6	18.1	16.2	14.1	13.5
11.1875	14.7	18.3	18.3	17.6	18.1	16.2	14.1	13.5
11.1944	14.7	18.3	18.3	17.6	18.1	16.2	14	13.4
11.2014	14.7	18.2	18.3	17.6	18.1	16.2	14	13.3
11.2083	14.7	18.2	18.3	17.6	18.1	16.1	13.9	13.3
11.2153	14.6	18.2	18.3	17.6	18.1	16.1	13.9	13.4
11.2222	14.6	18.2	18.3	17.6	18.1	16.1	14	13.5
11.2292	14.6	18.2	18.3	17.5	18.1	16.1	14	13.7
11.2361	14.6	18.2	18.3	17.5	18	16.1	14.1	13.8
11.2431	14.6	18.1	18.3	17.5	18	16	14.1	14
11.25	14.6	18.1	18.3	17.5	18	16	14.2	13.9
11.2569	14.7	18.1	18.3	17.5	18	16	14.2	14
11.2639	14.7	18.1	18.3	17.5	18	16	14.3	14.1
11.2708	14.7	18.1	18.3	17.5	18	16	14.3	14.1
11.2778	14.7	18	18.2	17.5	18	15.9	14.3	13.9
11.2847	14.7	18	18.2	17.5	18	15.9	14.2	13.9
11.2917	14.7	18	18.2	17.5	18	15.9	14.1	13.9
11.2986	14.7	18	18.2	17.5	18	15.9	14.1	14
11.3056	14.7	18	18.2	17.5	18	15.9	14.2	14
11.3125	14.8	18	18.2	17.5	18	15.9	14.3	14.3
11.3194	14.9	18	18.2	17.5	18	15.9	14.4	14.5
11.3264	15.1	18	18.2	17.5	18	15.9	14.6	14.8
11.3333	15.3	18	18.2	17.5	18	15.9	14.7	15.1
11.3403	15.5	18	18.2	17.5	18	15.9	15	15.4
11.3472	15.7	18	18.2	17.5	18	15.8	15.1	15.5
11.3542	15.9	17.9	18.2	17.5	18	15.8	15.2	15.9
11.3611	16	17.9	18.2	17.5	18	15.8	15.5	16.4
11.3681	16.3	17.9	18.2	17.5	18	15.8	15.8	16.9
11.375	16.6	17.9	18.1	17.5	18	15.8	16.1	17.2
11.3819	17	17.9	18.1	17.5	18	15.8	16.4	18
11.3889	17.3	17.9	18.1	17.5	18	15.7	16.8	18
11.3958	17.6	17.9	18.1	17.5	18	15.7	17.2	20.3
11.4028	18	17.8	18.1	17.4	18	15.7	17.8	19.5
11.4097	18.3	17.8	18.1	17.4	18	15.7	18	20.2
11.4167	18.6	17.8	18.1	17.4	17.9	15.7	18.4	20.2
11.4236	18.9	17.8	18.1	17.4	17.9	15.7	18.5	19.2
11.4306	19	17.8	18.1	17.4	17.9	15.7	18.4	18.6
11.4375	18.9	17.8	18.1	17.4	17.9	15.7	18.1	17.2
11.4444	18.4	17.8	18.1	17.4	17.9	15.7	17.6	16.5
11.4514	17.9	17.8	18	17.4	17.9	15.6	17.2	16.5
11.4583	17.4	17.8	18	17.4	17.9	15.6	17.1	16.8
11.4653	17.3	17.8	18	17.4	17.9	15.6	17.1	17.5
11.4722	17.4	17.7	18	17.4	17.9	15.6	17.3	18.5
11.4792	17.8	17.7	18	17.4	17.9	15.6	17.9	19.7
11.4861	18.4	17.7	18	17.4	17.8	15.6	18.5	20.4
11.4931	19.4	17.7	18	17.4	17.8	15.6	19.3	22.6
11.5	20.7	17.7	18	17.4	17.8	15.6	20.2	23.3
11.5069	22.2	17.7	18	17.4	17.8	15.6	20.9	23.8
11.5139	23.5	17.7	18	17.4	17.8	15.6	21.5	24.3
11.5208	24.5	17.7	18	17.4	17.8	15.6	22	25.9
11.5278	25.4	17.7	18	17.3	17.8	15.6	22.5	24.9
11.5347	25.8	17.7	18	17.3	17.8	15.6	22.7	24.5
11.5417	26.1	17.8	18	17.3	17.8	15.6	23	25.9
11.5486	26.4	17.8	18	17.3	17.8	15.6	23.2	25.9
11.5556	26.8	17.8	18	17.3	17.8	15.7	23.6	27.5
11.5625	27.4	17.8	18	17.3	17.8	15.7	23.7	25.7
11.5694	27.6	17.8	18	17.3	17.8	15.7	23.8	25.1
11.5764	27.8	17.8	18	17.3	17.7	15.7	23.8	26.2
11.5833	28.3	17.8	18	17.3	17.7	15.7	24	26.2
11.5903	28.7	17.8	18	17.3	17.7	15.7	24.1	25.5
11.5972	29.1	17.9	17.9	17.3	17.7	15.7	24.2	25.8
11.6042	29.2	17.9	17.9	17.3	17.7	15.8	24.3	25.4
11.6111	29.4	17.9	17.9	17.3	17.7	15.8	24.5	24.9
11.6181	28.9	17.9	17.9	17.3	17.7	15.8	24.2	23.3
11.625	28	18	17.9	17.3	17.7	15.9	23.8	22.6
11.6319	26.8	18	17.9	17.2	17.7	15.9	23.5	19.9
11.6389	25.1	18	17.9	17.2	17.7	15.9	22	19.5
11.6458	23.4	18	17.9	17.2	17.7	15.9	21.3	19.2
11.6528	22.2	18	17.9	17.2	17.7	15.9	20.9	19.7
11.6597	21.4	18	17.9	17.2	17.6	15.9	20.9	20
11.6667	20.8	18	17.9	17.2	17.6	16	20.8	20.3
11.6736	20.5	18.1	17.8	17.2	17.6	16	20.8	20.4
11.6806	20.3	18.1	17.8	17.2	17.6	16.1	20.7	20.3
11.6875	20.1	18.1	17.8	17.2	17.6	16.1	20.7	20.3
11.6944	20	18.2	17.8	17.2	17.6	16.2	20.6	20.2
11.7014	20	18.2	17.8	17.2	17.6	16.2	20.6	20.1
11.7083	20	18.2	17.8	17.2	17.6	16.2	20.5	19.6
11.7153	19.9	18.2	17.8	17.2	17.6	16.3	20.4	19.2
11.7222	19.8	18.3	17.8	17.2	17.6	16.3	20.3	19.1
11.7292	19.6	18.3	17.8	17.2	17.6	16.3	20.1	18.7
11.7361	19.3	18.3	17.8	17.1	17.6	16.4	20	18.7
11.7431	18.9	18.3	17.8	17.1	17.6	16.4	19.8	18.3
11.75	18.7	18.4	17.8	17.1	17.6	16.4	19.7	18.7
11.7569	18.6	18.4	17.8	17.1	17.6	16.4	19.6	18.5
11.7639	18.5	18.4	17.8	17.1	17.6	16.4	19.4	17.6
11.7708	18.1	18.4	17.8	17.1	17.6	16.4	19.2	17.6
11.7778	17.9	18.4	17.8	17.1	17.6	16.5	19	17.9
11.7847	17.5	18.5	17.8	17.1	17.6	16.5	18.8	17.9
11.7917	17.3	18.5	17.8	17.1	17.6	16.5	18.7	18
11.7986	17.2	18.5	17.8	17.1	17.6	16.5	18.6	17.8
11.8056	17.1	18.5	17.8	17.1	17.6	16.5	18.5	17.7
11.8125	17.1	18.5	17.8	17.1	17.7	16.5	18.4	17.7
11.8194	17	18.5	17.8	17.1	17.7	16.6	18.2	17.6
11.8264	17	18.5	17.8	17.1	17.7	16.6	18.1	17.3
11.8333	16.9	18.6	17.9	17.1	17.7	16.6	18	17.1
11.8403	16.9	18.6	17.9	17.1	17.7	16.6	18	17
11.8472	16.8	18.6	17.9	17.1	17.7	16.6	17.9	16.9
11.8542	16.8	18.6	17.9	17.1	17.7	16.6	17.8	17
11.8611	16.7	18.6	17.9	17.1	17.7	16.6	17.7	16.9
11.8681	16.7	18.6	17.9	17.1	17.7	16.6	17.7	16.9
11.875	16.7	18.6	17.9	17.1	17.7	16.6	17.6	16.9
11.8819	16.7	18.6	17.9	17.1	17.7	16.6	17.6	16.8
11.8889	16.7	18.6	17.9	17.1	17.7	16.6	17.5	16.6
11.8958	16.7	18.6	17.9	17.1	17.7	16.6	17.5	16.8
11.9028	16.7	18.6	17.9	17.1	17.8	16.6	17.4	16.7
11.9097	16.7	18.6	17.9	17.1	17.8	16.6	17.4	15.9
11.9167	16.6	18.6	18	17.1	17.8	16.6	17	15.6
11.9236	16.4	18.6	18	17.1	17.8	16.6	16.6	15
11.9306	16.2	18.6	18	17.1	17.8	16.6	16.5	15.6
11.9375	16.1	18.6	18	17.1	17.8	16.6	16.4	15.9
11.9444	16.1	18.6	18	17.1	17.8	16.6	16.5	15.9
11.9514	16	18.6	18	17.2	17.8	16.6	16.4	16
11.9583	16	18.6	18	17.2	17.8	16.6	16.4	16
11.9653	16	18.6	18	17.2	17.8	16.6	16.4	15.9
11.9722	16	18.6	18	17.2	17.8	16.6	16.3	15.6
11.9792	15.9	18.6	18	17.2	17.8	16.6	16.2	15.5
11.9861	15.9	18.6	18	17.2	17.8	16.5	16.1	15.5
11.9931	15.9	18.6	18	17.2	17.9	16.5	16	15.5
12	15.9	18.6	18	17.2	17.9	16.5	15.9	14.9
12.0069	15.8	18.6	18	17.2	17.9	16.5	15.8	15.2
12.0139	15.7	18.5	18	17.2	17.9	16.5	15.6	15
12.0208	15.7	18.5	18	17.2	17.9	16.5	15.6	15.2
12.0278	15.6	18.5	18	17.2	17.9	16.5	15.6	15.2
12.0347	15.6	18.5	18	17.2	17.9	16.5	15.6	15.3
12.0417	15.6	18.5	18	17.2	17.9	16.5	15.5	15.2
12.0486	15.6	18.5	18	17.2	17.9	16.5	15.5	15
12.0556	15.5	18.5	18	17.2	17.9	16.4	15.5	15
12.0625	15.5	18.5	18	17.2	17.9	16.4	15.4	14.9
12.0694	15.5	18.5	18	17.2	17.9	16.4	15.4	15
12.0764	15.5	18.5	18	17.2	17.9	16.4	15.4	15.1
12.0833	15.5	18.5	18	17.2	17.9	16.4	15.5	15.1
12.0903	15.5	18.4	18	17.2	17.9	16.4	15.5	15.2
12.0972	15.5	18.4	18	17.2	17.9	16.4	15.5	15.3
12.1042	15.5	18.4	18	17.2	17.9	16.4	15.5	15.4
12.1111	15.5	18.4	18	17.2	17.9	16.4	15.5	15.5
12.1181	15.5	18.4	18	17.2	17.9	16.4	15.5	15.4
12.125	15.5	18.4	18	17.2	17.9	16.4	15.5	15.4
12.1319	15.5	18.4	18	17.2	17.9	16.4	15.6	15.4
12.1389	15.5	18.4	18	17.2	17.9	16.4	15.6	15.5
12.1458	15.5	18.4	18	17.2	17.9	16.3	15.5	15.2
12.1528	15.5	18.3	18	17.2	17.9	16.3	15.5	15.2
12.1597	15.5	18.3	18	17.2	17.9	16.3	15.5	15.3
12.1667	15.5	18.3	18	17.2	17.9	16.3	15.5	15.1
12.1736	15.4	18.3	18.1	17.2	17.9	16.3	15.4	15.1
12.1806	15.3	18.3	18	17.2	17.9	16.3	15.3	15.1
12.1875	15.3	18.3	18	17.2	17.9	16.2	15.3	15.1
12.1944	15.3	18.3	18	17.2	17.9	16.2	15.3	15.1
12.2014	15.3	18.2	18	17.2	17.9	16.2	15.3	15.1
12.2083	15.2	18.2	18	17.2	17.9	16.2	15.2	15.2
12.2153	15.2	18.2	18	17.2	17.9	16.2	15.2	15.1
12.2222	15.2	18.2	18	17.2	17.9	16.2	15.3	15.2
12.2292	15.2	18.2	18	17.2	17.9	16.1	15.3	15.2
12.2361	15.2	18.2	18	17.2	17.9	16.1	15.3	15
12.2431	15.2	18.2	18	17.2	17.9	16.1	15.2	15
12.25	15.2	18.1	18	17.2	17.9	16.1	15.2	15.1
12.2569	15.2	18.1	18	17.2	17.9	16.1	15.3	15.2
12.2639	15.3	18.1	18	17.2	17.9	16.1	15.3	15.2
12.2708	15.3	17.9	18	17.2	17.9	16.1	15.3	15.4
12.2778	24.2	17.9	17.9	17.1	17.7	15.9	23	26.5
12.2847	25.3	17.9	17.9	17.1	17.7	15.9	23.3	26.5
12.2917	26.2	17.9	17.9	17.1	17.7	15.9	23.7	26.9
12.2986	27.1	18	17.9	17.1	17.7	15.9	24	27.1
12.3056	28	18	17.9	17.1	17.7	15.9	24.3	28.1
12.3125	28.7	18	17.9	17.1	17.7	15.9	24.7	26.5
12.3194	29.2	18	17.9	17.1	17.7	15.9	24.9	27.8
12.3264	29.4	18	17.9	17.1	17.7	15.9	25	27.1
12.3333	29.6	18	17.9	17.1	17.7	15.9	25	27.1
12.3403	29.9	18	17.9	17.1	17.7	15.9	25.1	26.1
12.3472	30	18	17.9	17.1	17.7	16	25.1	25.8
12.3542	29.6	18	17.9	17.1	17.7	16	25	25.6
12.3611	29.2	18.1	17.9	17.1	17.7	16	25	25
12.3681	28.8	18.1	17.9	17.1	17.7	16	24.9	25.5
12.375	28.1	18.1	17.9	17.1	17.7	16.1	24.7	24.6
12.3819	27.2	18.1	17.9	17.1	17.6	16.1	24.5	24.4
12.3889	26.4	18.2	17.9	17.1	17.6	16.1	24.2	24.1
12.3958	25.5	18.2	17.8	17.1	17.6	16.2	24	22.4
12.4028	24.7	18.2	17.8	17.1	17.6	16.2	23.6	21.8
12.4097	23.8	18.3	17.8	17.1	17.6	16.3	23.3	19.3
12.4167	22.7	18.3	17.8	17.1	17.6	16.3	22.9	19.5
12.4236	21.9	18.3	17.8	17.1	17.6	16.3	22.5	19
12.4306	21.2	18.4	17.8	17.1	17.6	16.4	22.2	18.4
12.4375	20.5	18.4	17.8	17.1	17.6	16.4	21.3	17.6
12.4444	20	18.4	17.8	17.1	17.6	16.4	20.9	18.7
12.4514	19.6	18.4	17.8	17.1	17.6	16.4	20.7	18.4
12.4583	19.2	18.5	17.8	17.1	17.6	16.5	20.4	18.1
12.4653	18.9	18.5	17.8	17.1	17.6	16.5	20.2	18.3
12.4722	18.7	18.5	17.8	17.1	17.6	16.5	20	18.4
12.4792	18.5	18.6	17.8	17.1	17.6	16.6	20	18.1
12.4861	18.4	18.6	17.8	17.1	17.6	16.6	19.9	17.4
12.4931	18.4	18.6	17.8	17.1	17.6	16.6	19.8	17.6
12.5	18.3	18.6	17.8	17.1	17.6	16.7	19.7	18
12.5069	18.3	18.7	17.8	17.1	17.6	16.7	19.6	17.6
12.5139	18.3	18.7	17.8	17.1	17.6	16.7	19.5	17.3
12.5208	18.3	18.7	17.8	17.1	17.6	16.8	19.4	17.2
12.5278	18.3	18.7	17.9	17.1	17.6	16.8	19.3	17
12.5347	18.2	18.7	17.9	17.1	17.6	16.8	19.2	17.1
12.5417	18.2	18.7	17.9	17.1	17.7	16.8	19	17
12.5486	18.1	18.8	17.9	17.1	17.7	16.8	18.9	16.9
12.5556	18.1	18.8	17.9	17.1	17.7	16.9	18.8	16.8
12.5625	18	18.8	17.9	17.1	17.7	16.9	18.7	16.9
12.5694	18	18.8	17.9	17.1	17.7	16.9	18.6	17.2
12.5764	18	18.8	17.9	17.1	17.7	16.9	18.6	16.7
12.5833	18	18.8	17.9	17.1	17.7	16.9	18.5	16.8
12.5903	17.9	18.8	17.9	17.1	17.7	16.9	18.4	16.9
12.5972	17.8	18.8	17.9	17.1	17.7	16.9	18.4	16.8
12.6042	17.8	18.8	18	17.1	17.7	16.9	18.3	17
12.6111	17.7	18.9	18	17.1	17.8	16.9	18.3	17.3
12.6181	17.7	18.9	18	17.1	17.8	16.9	18.2	17.3
12.625	17.6	18.9	18	17.1	17.8	17	18.2	17.1
12.6319	17.5	18.9	18	17.1	17.8	17	18.1	17.1
12.6389	17.5	18.9	18	17.1	17.8	17	18	16.8
12.6458	17.4	18.9	18	17.1	17.8	17	18	16.4
12.6528	17.4	18.9	18	17.1	17.8	17	18	16.4
12.6597	17.4	18.9	18	17.1	17.8	17	17.9	16.4
12.6667	17.3	18.9	18	17.1	17.8	17	17.8	16.3
12.6736	17.3	18.9	18	17.1	17.8	17	17.8	16.3
12.6806	17.3	18.9	18	17.1	17.9	17	17.7	16.2
12.6875	17.3	18.9	18	17.2	17.9	17	17.5	15.6
12.6944	17.1	18.9	18	17.2	17.9	16.9	17.3	15.9
12.7014	17.1	18.9	18	17.2	17.9	16.9	17.1	15.8
12.7083	17	18.9	18	17.2	17.9	16.9	17	16.2
12.7153	16.9	18.9	18	17.2	17.9	16.9	17	16.1
12.7222	16.8	18.9	18	17.2	17.9	16.9	16.9	15.3
12.7292	16.7	18.9	18	17.2	17.9	16.9	16.7	14.7
12.7361	16.6	18.9	18.1	17.2	17.9	16.9	16.4	15
12.7431	16.4	18.9	18.1	17.2	17.9	16.9	16.3	14.7
12.75	16.3	18.9	18.1	17.2	17.9	16.9	16.2	14.6
12.7569	16.2	18.9	18.1	17.2	17.9	16.9	16.1	14.4
12.7639	16.1	18.9	18.1	17.2	18	16.9	15.9	14.1
12.7708	15.9	18.9	18.1	17.2	18	16.9	15.8	14
12.7778	15.9	18.8	18.1	17.2	18	16.9	15.6	14.1
12.7847	15.8	18.8	18.1	17.2	18	16.9	15.6	14
12.7917	15.8	18.8	18.1	17.2	18	16.9	15.5	14.1
12.7986	15.7	18.8	18.1	17.2	18	16.9	15.5	14.1
12.8056	15.7	18.8	18.1	17.2	18	16.8	15.4	14
12.8125	15.7	18.8	18.1	17.3	18	16.8	15.4	13.9
12.8194	15.6	18.8	18.1	17.3	18	16.8	15.3	14
12.8264	15.6	18.8	18.2	17.3	18	16.8	15.2	13.8
12.8333	15.6	18.8	18.2	17.3	18	16.8	15.1	13.7
12.8403	15.5	18.8	18.2	17.3	18	16.8	15	13.7
12.8472	15.5	18.8	18.2	17.3	18	16.8	15	13.8
12.8542	15.5	18.7	18.2	17.3	18	16.7	15	13.7
12.8611	15.5	18.7	18.2	17.3	18	16.7	14.9	13.7
12.8681	15.5	18.7	18.2	17.3	18	16.7	14.9	14
12.875	15.5	18.7	18.2	17.3	18	16.7	14.9	13.7
12.8819	15.4	18.7	18.2	17.3	18	16.7	14.8	13.7
12.8889	15.4	18.7	18.2	17.3	18	16.7	14.7	13.7
12.8958	15.4	18.7	18.2	17.3	18	16.6	14.7	13.6
12.9028	15.4	18.7	18.2	17.3	18	16.6	14.7	13.7
12.9097	15.3	18.6	18.2	17.3	18	16.6	14.7	13.6
12.9167	15.3	18.6	18.2	17.3	18	16.6	14.8	13.7
12.9236	15.3	18.6	18.2	17.3	18	16.6	14.8	13.7
12.9306	15.3	18.6	18.2	17.3	18	16.6	14.9	13.9
12.9375	15.3	18.6	18.2	17.3	18	16.5	14.9	14
12.9444	15.3	18.6	18.2	17.3	18	16.5	14.9	13.9
12.9514	15.3	18.5	18.2	17.3	18	16.5	14.9	14
12.9583	15.3	18.5	18.2	17.3	18	16.5	15	14
12.9653	15.3	18.5	18.2	17.3	18	16.4	15	13.8
12.9722	15.3	18.5	18.2	17.3	18	16.4	15	14
12.9792	15.3	18.5	18.2	17.3	18	16.4	15	14
12.9861	15.3	18.5	18.2	17.4	18	16.4	15	14.1
12.9931	15.3	18.5	18.2	17.4	18	16.4	15	14
13	15.3	18.4	18.2	17.4	18	16.4	14.9	13.7
13.0069	15.3	18.4	18.2	17.4	18	16.4	14.8	13.7
13.0139	15.2	18.4	18.2	17.4	18	16.4	14.7	14
13.0208	15.2	18.4	18.2	17.4	18	16.4	14.7	14.4
13.0278	15.2	18.4	18.2	17.4	18	16.3	14.7	13.7
13.0347	15.1	18.4	18.2	17.4	18	16.3	14.7	13.5
13.0417	15	18.3	18.2	17.4	18	16.3	14.5	13.1
13.0486	14.9	18.3	18.2	17.4	18	16.3	14.4	13.2
13.0556	14.8	18.3	18.2	17.4	18	16.3	14.4	13.3
13.0625	14.7	18.3	18.2	17.4	18	16.2	14.3	13.4
13.0694	14.7	18.3	18.2	17.4	18	16.2	14.3	13.5
13.0764	14.7	18.3	18.2	17.4	18	16.2	14.4	13.6
13.0833	14.7	18.2	18.2	17.4	18	16.2	14.4	13.7
13.0903	14.7	18.2	18.2	17.4	18	16.2	14.4	13.6
13.0972	14.7	18.2	18.2	17.4	18	16.1	14.3	13.7
13.1042	14.7	18.2	18.2	17.4	18	16.1	14.3	13.9
13.1111	14.7	18.2	18.2	17.4	18	16.1	14.3	14
13.1181	14.7	18.2	18.2	17.4	18	16.1	14.4	14.1
13.125	14.7	18.1	18.2	17.4	18	16.1	14.4	14.1
13.1319	14.6	18.1	18.2	17.4	18	16	14.4	14.3
13.1389	14.6	18.1	18.2	17.4	18	16	14.4	14.5
13.1458	14.6	18.1	18.2	17.4	18	16	14.4	14.2
13.1528	14.6	18.1	18.1	17.4	18	16	14.5	14
13.1597	14.6	18	18.1	17.3	18	16	14.4	13.6
13.1667	14.6	18	18.1	17.3	18	15.9	14.4	13.6
13.1736	14.6	18	18.1	17.3	18	15.9	14.4	13.6
13.1806	14.6	18	18.1	17.3	18	15.9	14.4	14
13.1875	14.7	18	18.1	17.3	17.9	15.9	14.4	14
13.1944	14.7	18	18.1	17.3	17.9	15.9	14.4	14.4
13.2014	14.8	18	18.1	17.3	17.9	15.9	14.5	14.4
13.2083	14.9	18	18.1	17.3	17.9	15.9	14.7	14.6
13.2153	15.1	18	18.1	17.3	17.9	15.9	14.8	15.2
13.2222	15.5	18	18.1	17.3	17.9	15.8	15.1	15.9
13.2292	15.9	18	18.1	17.3	17.9	15.8	15.5	17.7
13.2361	16.7	17.9	18.1	17.3	17.9	15.8	16.4	19
13.2431	17.8	17.9	18.1	17.3	17.9	15.8	17.2	20.3
13.25	19	17.9	18.1	17.3	17.9	15.8	18.1	20.3
13.2569	20.3	17.9	18.1	17.3	17.9	15.7	19	19
13.2639	21.3	17.9	18.1	17.3	17.9	15.7	19.4	19.5
13.2708	21.7	17.9	18	17.3	17.9	15.7	19.7	19.9
13.2778	22.1	17.9	18	17.3	17.9	15.7	20.1	20.7
13.2847	22.6	17.9	18	17.3	17.9	15.7	20.6	20.9
13.2917	23.1	17.9	18	17.3	17.9	15.7	20.9	20.3
13.2986	23.5	17.9	18	17.3	17.9	15.6	21	21
13.3056	23.6	17.9	18	17.3	17.9	15.6	21.3	22
13.3125	24.1	17.9	18	17.3	17.9	15.6	21.5	21.8
13.3194	24.3	17.9	18	17.3	17.8	15.6	21.6	21.3
13.3264	24.1	17.8	18	17.3	17.8	15.6	21.4	20.7
13.3333	23.3	17.8	18	17.3	17.8	15.6	21.4	22.5
13.3403	23	17.8	18	17.3	17.8	15.6	21.7	22.9
13.3472	23.6	17.9	18	17.3	17.8	15.6	21.9	21
13.3542	24	17.9	18	17.3	17.8	15.6	21.9	20.1
13.3611	23.7	17.9	18	17.3	17.8	15.6	21.8	19.9
13.3681	23.1	17.9	18	17.3	17.8	15.6	21.6	19.5
13.375	22.5	17.9	18	17.3	17.8	15.6	21.3	20
13.3819	21.9	17.9	18	17.2	17.8	15.7	21	19.6
13.3889	21.5	17.9	18	17.2	17.8	15.7	20.7	16.3
13.3958	20.8	17.9	18	17.2	17.7	15.7	19.8	16
13.4028	19.9	17.9	18	17.2	17.7	15.7	18.9	15.6
13.4097	19.1	17.9	17.9	17.2	17.7	15.7	18.2	15.2
13.4167	18.4	17.9	17.9	17.2	17.7	15.7	17.9	15.3
13.4236	17.9	18	17.9	17.2	17.7	15.7	17.6	14.6
13.4306	17.4	18	17.9	17.2	17.7	15.8	17.2	14.5
13.4375	17.1	18	17.9	17.2	17.7	15.8	16.9	14.5
13.4444	16.9	18	17.9	17.2	17.7	15.8	16.7	14.6
13.4514	16.7	18	17.9	17.2	17.7	15.8	16.6	14.7
13.4583	16.7	18	17.9	17.2	17.7	15.8	16.6	15
13.4653	16.6	18	17.9	17.2	17.7	15.8	16.5	15.1
13.4722	16.6	18	17.9	17.1	17.7	15.9	16.5	15.6
13.4792	16.6	18	17.9	17.1	17.6	15.9	16.5	15.9
13.4861	16.6	18	17.9	17.1	17.6	15.9	16.5	15
13.4931	16.6	18	17.9	17.1	17.6	15.9	16.4	14.6
13.5	16.4	18	17.9	17.1	17.6	15.9	16.2	14.5
13.5069	16.4	18	17.8	17.1	17.6	15.9	16.1	14.7
13.5139	16.3	18	17.8	17.1	17.6	15.9	16	14.9
13.5208	16.2	18	17.8	17.1	17.6	15.9	15.9	14.7
13.5278	16.1	18	17.8	17.1	17.6	15.9	15.9	14.5
13.5347	16.1	18	17.8	17.1	17.6	15.9	15.7	14.6
13.5417	16	18	17.8	17.1	17.6	15.9	15.7	14.7
13.5486	15.9	18	17.8	17.1	17.6	15.9	15.7	14.5
13.5556	15.9	18	17.8	17.1	17.6	15.9	15.7	14.8
13.5625	15.8	18	17.8	17.1	17.6	15.9	15.7	14.9
13.5694	15.8	18	17.8	17.1	17.6	15.9	15.7	14.9
13.5764	15.8	18	17.8	17.1	17.6	15.9	15.7	14.9
13.5833	15.7	18	17.8	17.1	17.6	15.9	15.7	14.9
13.5903	15.7	18	17.8	17.1	17.6	15.9	15.7	14.8
13.5972	15.7	18	17.8	17.1	17.6	15.9	15.7	14.7
13.6042	15.7	18	17.8	17.1	17.6	15.9	15.7	14.7
13.6111	15.6	18	17.8	17.1	17.6	15.9	15.7	14.9
13.6181	15.6	18	17.8	17.1	17.6	15.9	15.6	14.8
13.625	15.6	18	17.8	17.1	17.6	15.9	15.6	14.8
13.6319	15.5	18	17.8	17.1	17.6	15.9	15.6	14.8
13.6389	15.5	18	17.8	17.1	17.6	15.9	15.5	14.8
13.6458	15.5	18	17.8	17.1	17.6	15.9	15.5	14.7
13.6528	15.5	18	17.8	17.1	17.6	15.9	15.5	14.6
13.6597	15.5	18	17.8	17.1	17.6	15.9	15.5	14.7
13.6667	15.5	18	17.8	17.1	17.6	15.9	15.5	14.7
13.6736	15.5	18	17.8	17.1	17.6	15.9	15.5	14.8
13.6806	15.5	18	17.8	17.1	17.6	15.8	15.5	14.7
13.6875	15.5	18	17.8	17.1	17.6	15.8	15.5	14.6
13.6944	15.5	18	17.8	17.1	17.6	15.8	15.5	14.4
13.7014	15.5	18	17.8	17.1	17.6	15.8	15.4	14.4
13.7083	15.5	18	17.8	17.1	17.6	15.8	15.4	14.5
13.7153	15.5	18	17.8	17.1	17.6	15.8	15.4	14.5
13.7222	15.4	18	17.8	17.1	17.6	15.8	15.3	14.4
13.7292	15.4	17.9	17.8	17.1	17.6	15.8	15.3	14.5
13.7361	15.4	17.9	17.8	17.1	17.6	15.8	15.2	14.5
13.7431	15.4	17.9	17.8	17.1	17.6	15.8	15.2	14.5
13.75	15.3	17.9	17.8	17.1	17.6	15.8	15.2	14.5
13.7569	15.3	17.9	17.8	17.1	17.6	15.8	15.2	14.5
13.7639	15.3	17.9	17.8	17.1	17.6	15.7	15.2	14.7
13.7708	15.3	17.9	17.8	17.1	17.6	15.7	15.2	14.4
13.7778	15.3	17.9	17.8	17.1	17.6	15.7	15.2	14.4
13.7847	15.3	17.9	17.8	17.1	17.6	15.7	15.1	14.5
13.7917	15.3	17.8	17.8	17.1	17.6	15.7	15.1	14.4
13.7986	15.3	17.8	17.8	17.1	17.6	15.7	15.1	14.3
13.8056	15.2	17.8	17.8	17.1	17.6	15.7	15.1	14.4
13.8125	15.2	17.8	17.8	17.1	17.6	15.7	15.1	14.4
13.8194	15.2	17.8	17.8	17.1	17.6	15.7	15	14.4
13.8264	15.2	17.8	17.8	17.1	17.6	15.7	15	14.4
13.8333	15.2	17.8	17.8	17.1	17.6	15.6	15	14.4
13.8403	15.2	17.8	17.8	17.1	17.6	15.6	15	14.4
13.8472	15.2	17.8	17.8	17	17.6	15.6	15	14.4
13.8542	15.2	17.8	17.8	17.1	17.6	15.6	15	14.4
13.8611	15.2	17.7	17.8	17	17.6	15.6	15	14.4
13.8681	15.2	17.7	17.8	17	17.5	15.6	15	13.9
13.875	15.2	17.7	17.8	17	17.5	15.6	14.9	14
13.8819	15.1	17.7	17.8	17	17.5	15.6	14.9	13.8
[truncated: 305 more rows]
