# Supplementary material for: Temperature Load Parameters and Thermal Effects of a Long‐Span Concrete‐Filled Steel Tube Arch Bridge in Tibet
Source: Hindawi journal article supplement (doi:10.1155/2020/9710613), 2020-01-01
Supplement: f1 [file 9710613.f1.zip › 9710613.f1/fig.5(b).xls]

## Sheet: Sheet1
time	1	2	3	4	5	6	7	0
0.00694444	-6.2	0.2	0.3	-0.1	-0.5	-1.8	-7.1	-10.2
0.0138889	-6.2	0.1	0.2	-0.1	-0.5	-1.9	-7.1	-10.2
0.0208333	-6.1	0.1	0.2	-0.1	-0.5	-1.9	-7.1	-10
0.0277778	-6.1	0.1	0.2	-0.1	-0.5	-1.9	-7.2	-9.9
0.0347222	-6	-0.1	0.2	-0.1	-0.5	-1.9	-7.2	-9.5
0.0416667	-5.9	-0.1	0.2	-0.1	-0.6	-1.9	-7.2	-9.3
0.0486111	-5.8	-0.1	0.2	-0.1	-0.6	-2	-7.2	-9.4
0.0555556	-5.7	-0.1	0.2	-0.1	-0.6	-2	-7.1	-9.3
0.0625	-5.4	-0.2	0.2	-0.1	-0.6	-2	-7.1	-8.7
0.0694444	-4.9	-0.2	0.2	-0.1	-0.6	-2.1	-7.1	-8.3
0.0763889	-4.3	-0.2	0.2	-0.1	-0.6	-2.1	-7	-7.9
0.0833333	-3.7	-0.2	0.2	-0.1	-0.6	-2.1	-7	-6
0.0902778	-3.1	-0.3	0.2	-0.1	-0.6	-2.1	-7	-1.9
0.0972222	-2.5	-0.3	0.2	-0.1	-0.6	-2.2	-6.8	-0.1
0.104167	-1.9	-0.3	0.1	-0.1	-0.6	-2.2	-6.6	-1
0.111111	-1.3	-0.3	0.1	-0.1	-0.6	-2.2	-6.4	0.8
0.118056	-0.7	-0.4	0.1	-0.1	-0.6	-2.3	-6.2	2.2
0.125	-0.1	-0.4	0.1	-0.1	-0.6	-2.3	-5.9	3.4
0.131944	0.4	-0.4	0.1	-0.1	-0.6	-2.3	-5.7	4.4
0.138889	0.9	-0.4	0.1	-0.2	-0.6	-2.3	-5.5	7.2
0.145833	1.5	-0.4	0.1	-0.2	-0.6	-2.4	-5.2	5.5
0.152778	2.1	-0.5	0.1	-0.2	-0.6	-2.4	-5	8.3
0.159722	2.6	-0.5	-0.1	-0.2	-0.7	-2.4	-4.7	7.9
0.166667	3.2	-0.5	-0.1	-0.2	-0.7	-2.4	-4.5	9
0.173611	3.6	-0.5	-0.1	-0.2	-0.7	-2.5	-4.3	10.6
0.180556	4	-0.5	-0.1	-0.2	-0.7	-2.5	-4	11
0.1875	4.4	-0.5	-0.1	-0.2	-0.7	-2.5	-3.8	12.7
0.194444	4.8	-0.5	-0.1	-0.2	-0.7	-2.5	-3.5	10.9
0.201389	5.1	-0.5	-0.1	-0.2	-0.7	-2.6	-3.2	13.7
0.208333	5.5	-0.5	-0.2	-0.2	-0.7	-2.6	-3	13.5
0.215278	5.8	-0.5	-0.2	-0.2	-0.7	-2.6	-2.7	13
0.222222	6	-0.5	-0.2	-0.2	-0.7	-2.6	-2.5	14
0.229167	6.3	-0.5	-0.2	-0.2	-0.8	-2.6	-2.3	13.9
0.236111	6.6	-0.5	-0.2	-0.2	-0.8	-2.6	-2	15.9
0.243056	6.9	-0.5	-0.2	-0.2	-0.8	-2.6	-1.8	15.2
0.25	7.1	-0.5	-0.2	-0.3	-0.8	-2.6	-1.5	16.4
0.256944	7.4	-0.5	-0.2	-0.3	-0.8	-2.6	-1.3	16.1
0.263889	7.6	-0.5	-0.3	-0.3	-0.8	-2.6	-1.1	17.5
0.270833	7.8	-0.5	-0.3	-0.3	-0.8	-2.6	-0.9	18.6
0.277778	8	-0.5	-0.3	-0.3	-0.8	-2.6	-0.7	17.5
0.284722	8.1	-0.4	-0.3	-0.3	-0.8	-2.6	-0.4	13.5
0.291667	7.7	-0.4	-0.3	-0.3	-0.9	-2.6	-0.3	16.4
0.298611	7.1	-0.4	-0.3	-0.3	-0.9	-2.6	-0.1	16.8
0.305556	6.4	-0.4	-0.3	-0.3	-0.9	-2.5	0.1	17.4
0.3125	5.7	-0.4	-0.3	-0.3	-0.9	-2.5	0.2	17.1
0.319444	5	-0.3	-0.3	-0.3	-0.9	-2.5	0.3	10.6
0.326389	4.4	-0.3	-0.4	-0.4	-0.9	-2.5	0.2	7.9
0.333333	3.9	-0.3	-0.4	-0.4	-0.9	-2.4	0.1	7.3
0.340278	3.5	-0.2	-0.4	-0.4	-0.9	-2.4	-0.1	6
0.347222	3.1	-0.2	-0.4	-0.4	-1	-2.4	-0.2	5
0.354167	2.8	-0.2	-0.4	-0.4	-1	-2.4	-0.3	4.5
0.361111	2.5	-0.1	-0.4	-0.4	-1	-2.3	-0.4	4.2
0.368056	2.2	-0.1	-0.4	-0.4	-1	-2.3	-0.5	3.7
0.375	2	-0.1	-0.4	-0.4	-1	-2.3	-0.6	3.5
0.381944	1.8	0.1	-0.4	-0.4	-1	-2.2	-0.6	3.1
0.388889	1.6	0.1	-0.4	-0.4	-1	-2.2	-0.7	2.7
0.395833	1.4	0.2	-0.4	-0.4	-1	-2.2	-0.8	2.4
0.402778	1.3	0.2	-0.4	-0.5	-1	-2.1	-0.9	2.1
0.409722	1.1	0.2	-0.4	-0.5	-1	-2.1	-0.9	1.8
0.416667	0.9	0.2	-0.4	-0.5	-1.1	-2.1	-1	1.7
0.423611	0.8	0.3	-0.4	-0.5	-1.1	-2	-1.1	1.3
0.430556	0.7	0.3	-0.4	-0.5	-1.1	-2	-1.1	1.1
0.4375	0.5	0.3	-0.4	-0.5	-1.1	-2	-1.2	0.9
0.444444	0.4	0.3	-0.4	-0.5	-1.1	-1.9	-1.3	0.8
0.451389	0.3	0.4	-0.4	-0.5	-1.1	-1.9	-1.3	0.4
0.458333	0.1	0.4	-0.4	-0.5	-1.1	-1.9	-1.4	-0.3
0.465278	-0.1	0.4	-0.4	-0.5	-1.1	-1.8	-1.5	-0.5
0.472222	-0.2	0.4	-0.4	-0.5	-1.1	-1.8	-1.6	-0.5
0.479167	-0.3	0.4	-0.3	-0.5	-1.1	-1.8	-1.7	-0.9
0.486111	-0.3	0.5	-0.3	-0.5	-1.1	-1.8	-1.8	-1.1
0.493056	-0.4	0.5	-0.3	-0.5	-1.1	-1.7	-1.9	-1.6
0.5	-0.4	0.5	-0.3	-0.5	-1.1	-1.7	-1.9	0.1
0.506944	-0.4	0.5	-0.3	-0.5	-1.1	-1.7	-2	-0.4
0.513889	-0.4	0.5	-0.3	-0.5	-1.1	-1.7	-2.1	-0.5
0.520833	-0.5	0.5	-0.3	-0.5	-1.2	-1.7	-2.1	-0.1
0.527778	-0.5	0.5	-0.3	-0.5	-1.2	-1.6	-2.2	0.1
0.534722	-0.5	0.6	-0.3	-0.5	-1.2	-1.6	-2.2	-0.4
0.541667	-0.6	0.6	-0.3	-0.6	-1.2	-1.6	-2.3	-0.4
0.548611	-0.6	0.6	-0.3	-0.6	-1.2	-1.6	-2.3	-0.6
0.555556	-0.7	0.6	-0.3	-0.6	-1.2	-1.6	-2.3	-1
0.5625	-0.8	0.6	-0.2	-0.6	-1.2	-1.6	-2.3	-1
0.569444	-0.8	0.6	-0.2	-0.6	-1.2	-1.5	-2.4	-0.9
0.576389	-0.9	0.6	-0.2	-0.6	-1.2	-1.5	-2.4	-0.9
0.583333	-0.9	0.6	-0.2	-0.6	-1.2	-1.5	-2.5	-1.2
0.590278	-1	0.6	-0.2	-0.6	-1.2	-1.5	-2.5	-1.4
0.597222	-1.1	0.7	-0.2	-0.6	-1.2	-1.5	-2.5	-1.3
0.604167	-1.1	0.7	-0.2	-0.5	-1.2	-1.5	-2.6	-1.3
0.611111	-1.2	0.7	-0.2	-0.5	-1.2	-1.5	-2.6	-1.4
0.618056	-1.2	0.7	-0.2	-0.5	-1.2	-1.5	-2.7	-1.7
0.625	-1.3	0.7	-0.2	-0.5	-1.2	-1.4	-2.7	-1.6
0.631944	-1.3	0.7	-0.2	-0.5	-1.2	-1.4	-2.8	-1.8
0.638889	-1.4	0.7	-0.1	-0.5	-1.2	-1.4	-2.9	-2.1
0.645833	-1.5	0.7	-0.1	-0.5	-1.2	-1.4	-2.9	-2
0.652778	-1.6	0.7	-0.1	-0.5	-1.2	-1.4	-2.9	-2.6
0.659722	-1.7	0.7	-0.1	-0.5	-1.2	-1.4	-3	-2.4
0.666667	-1.8	0.7	-0.1	-0.5	-1.2	-1.4	-3	-2.6
0.673611	-1.8	0.7	-0.1	-0.5	-1.2	-1.4	-3.1	-2.9
0.680556	-1.9	0.7	-0.1	-0.5	-1.2	-1.4	-3.1	-2.7
0.6875	-2	0.7	-0.1	-0.5	-1.2	-1.4	-3.2	-3.2
0.694444	-2	0.7	-0.1	-0.5	-1.2	-1.4	-3.3	-3.3
0.701389	-2.1	0.6	-0.1	-0.5	-1.2	-1.4	-3.3	-3.3
0.708333	-2.2	0.6	-0.1	-0.5	-1.2	-1.4	-3.4	-3.5
0.715278	-2.3	0.6	-0.1	-0.5	-1.2	-1.4	-3.5	-3.8
0.722222	-2.3	0.6	-0.1	-0.5	-1.2	-1.4	-3.5	-3.8
0.729167	-2.4	0.6	-0.1	-0.5	-1.2	-1.4	-3.6	-3.9
0.736111	-2.4	0.6	-0.1	-0.5	-1.1	-1.4	-3.7	-4.1
0.743056	-2.5	0.6	-0.1	-0.5	-1.2	-1.4	-3.7	-4.1
0.75	-2.6	0.6	-0.1	-0.5	-1.1	-1.4	-3.8	-4.1
0.756944	-2.6	0.6	-0.1	-0.5	-1.1	-1.4	-3.9	-4.5
0.763889	-2.7	0.6	-0.1	-0.5	-1.1	-1.4	-3.9	-4.6
0.770833	-2.8	0.6	-0.1	-0.5	-1.1	-1.4	-4	-4.1
0.777778	-2.9	0.5	-0.1	-0.5	-1.1	-1.4	-4	-4.7
0.784722	-2.9	0.5	-0.1	-0.5	-1.1	-1.4	-4.1	-4.8
0.791667	-3	0.5	-0.1	-0.5	-1.1	-1.5	-4.2	-4.4
0.798611	-3.1	0.5	-0.1	-0.5	-1.1	-1.5	-4.2	-5.2
0.805556	-3.2	0.5	-0.1	-0.5	-1.1	-1.5	-4.3	-5.3
0.8125	-3.3	0.5	-0.1	-0.5	-1.1	-1.5	-4.4	-5.3
0.819444	-3.3	0.5	-0.1	-0.5	-1.1	-1.5	-4.4	-5.1
0.826389	-3.4	0.5	-0.1	-0.5	-1.1	-1.5	-4.5	-5.6
0.833333	-3.5	0.5	-0.1	-0.5	-1.1	-1.5	-4.6	-5.9
0.840278	-3.5	0.4	-0.1	-0.5	-1.1	-1.5	-4.7	-5.8
0.847222	-3.6	0.4	-0.1	-0.5	-1.1	-1.5	-4.7	-5.3
0.854167	-3.6	0.4	-0.1	-0.5	-1.1	-1.5	-4.8	-5.4
0.861111	-3.7	0.4	-0.1	-0.5	-1.1	-1.5	-4.9	-5.9
0.868056	-3.8	0.4	-0.2	-0.4	-1.1	-1.6	-5	-6.1
0.875	-3.9	0.4	-0.2	-0.4	-1.1	-1.6	-5	-6.3
0.881944	-3.9	0.4	-0.2	-0.4	-1.1	-1.6	-5.1	-6.8
0.888889	-4	0.4	-0.2	-0.4	-1.1	-1.6	-5.1	-6.7
0.895833	-4.1	0.3	-0.2	-0.4	-1.1	-1.6	-5.2	-6.7
0.902778	-4.2	0.3	-0.2	-0.4	-1.1	-1.6	-5.3	-6.7
0.909722	-4.2	0.3	-0.2	-0.4	-1.1	-1.6	-5.3	-6.9
0.916667	-4.3	0.3	-0.2	-0.4	-1.1	-1.7	-5.4	-7.1
0.923611	-4.4	0.3	-0.2	-0.4	-1.1	-1.7	-5.4	-7.1
0.930556	-4.4	0.3	-0.2	-0.4	-1.1	-1.7	-5.5	-7.3
0.9375	-4.5	0.2	-0.2	-0.4	-1.1	-1.7	-5.6	-7.1
0.944444	-4.6	0.2	-0.3	-0.4	-1.1	-1.7	-5.6	-7.3
0.951389	-4.6	0.2	-0.3	-0.4	-1.1	-1.7	-5.7	-7.5
0.958333	-4.7	0.2	-0.3	-0.4	-1.1	-1.8	-5.7	-7.7
0.965278	-4.8	0.2	-0.3	-0.4	-1.1	-1.8	-5.8	-7.7
0.972222	-4.8	0.1	-0.3	-0.4	-1.1	-1.8	-5.9	-7.9
0.979167	-4.9	0.1	-0.3	-0.4	-1.1	-1.8	-5.9	-8
0.986111	-4.9	0.1	-0.3	-0.4	-1.1	-1.8	-6	-8.2
0.993056	-5	0.1	-0.3	-0.4	-1.1	-1.9	-6	-8
1	-5	-0.1	-0.3	-0.4	-1.1	-1.9	-6.1	-8.3
1.00694	-5	-0.1	-0.3	-0.4	-1.1	-1.9	-6.1	-8
1.01389	-5	-0.1	-0.3	-0.4	-1.1	-1.9	-6.2	-8.1
1.02083	-5.1	-0.1	-0.4	-0.4	-1.1	-1.9	-6.2	-8
1.02778	-5.1	-0.1	-0.4	-0.4	-1.1	-2	-6.3	-8
1.03472	-5.1	-0.2	-0.4	-0.4	-1.1	-2	-6.3	-8
1.04167	-5	-0.2	-0.4	-0.4	-1.1	-2	-6.3	-8
1.04861	-4.8	-0.2	-0.4	-0.4	-1.1	-2	-6.3	-8
1.05556	-4.4	-0.2	-0.4	-0.4	-1.1	-2	-6.3	-7.7
1.0625	-3.8	-0.2	-0.4	-0.4	-1.1	-2.1	-6.3	-7.3
1.06944	-3.2	-0.2	-0.4	-0.4	-1.1	-2.1	-6.3	-2.5
1.07639	-2.6	-0.3	-0.4	-0.4	-1.1	-2.1	-6.3	-1.1
1.08333	-2	-0.3	-0.4	-0.4	-1.1	-2.1	-6.3	1.7
1.09028	-1.4	-0.3	-0.4	-0.4	-1.1	-2.2	-6.1	0.7
1.09722	-0.7	-0.3	-0.4	-0.4	-1.1	-2.2	-5.9	3.4
1.10417	-0.1	-0.3	-0.4	-0.4	-1.1	-2.2	-5.7	3.4
1.11111	0.4	-0.3	-0.4	-0.4	-1.1	-2.2	-5.5	6.2
1.11806	1	-0.3	-0.4	-0.4	-1.1	-2.2	-5.3	7
1.125	1.6	-0.3	-0.4	-0.4	-1.1	-2.3	-5	9.1
1.13194	2.2	-0.3	-0.4	-0.4	-1.1	-2.3	-4.8	10.1
1.13889	2.7	-0.3	-0.4	-0.4	-1.1	-2.3	-4.5	10.2
1.14583	3.2	-0.3	-0.4	-0.4	-1.1	-2.3	-4.3	11.5
1.15278	3.7	-0.3	-0.4	-0.4	-1.1	-2.3	-4	13.9
1.15972	4.1	-0.3	-0.4	-0.4	-1.1	-2.3	-3.8	12.7
1.16667	4.5	-0.3	-0.4	-0.4	-1.1	-2.4	-3.5	13.6
1.17361	5	-0.3	-0.3	-0.4	-1.2	-2.4	-3.3	12.8
1.18056	5.3	-0.3	-0.3	-0.4	-1.2	-2.4	-3	11.5
1.1875	5.7	-0.3	-0.3	-0.4	-1.2	-2.4	-2.7	15
1.19444	6	-0.3	-0.3	-0.5	-1.2	-2.4	-2.4	13.5
1.20139	6.4	-0.3	-0.3	-0.5	-1.2	-2.4	-2.2	13.8
1.20833	6.8	-0.2	-0.3	-0.5	-1.2	-2.4	-1.9	17.3
1.21528	7.1	-0.2	-0.3	-0.5	-1.2	-2.5	-1.6	13.8
1.22222	7.5	-0.2	-0.3	-0.5	-1.2	-2.5	-1.4	19.6
1.22917	7.8	-0.2	-0.3	-0.5	-1.2	-2.5	-1.2	17.6
1.23611	8.1	-0.2	-0.3	-0.5	-1.2	-2.5	-0.9	17.3
1.24306	8.5	-0.1	-0.2	-0.5	-1.2	-2.5	-0.7	16.5
1.25	8.8	-0.1	-0.2	-0.5	-1.2	-2.4	-0.5	14
1.25694	9.1	-0.1	-0.2	-0.5	-1.2	-2.4	-0.3	18.7
1.26389	9.1	0.1	-0.2	-0.5	-1.2	-2.4	-0.1	16.4
1.27083	9.2	0.1	-0.2	-0.5	-1.2	-2.4	0.1	19.7
1.27778	9.1	0.2	-0.2	-0.5	-1.2	-2.4	0.3	16.3
1.28472	8.7	0.2	-0.2	-0.5	-1.2	-2.4	0.5	17.1
1.29167	8	0.2	-0.2	-0.5	-1.2	-2.4	0.7	13.5
1.29861	7.3	0.3	-0.1	-0.5	-1.3	-2.3	0.9	15.5
1.30556	6.7	0.3	-0.1	-0.5	-1.3	-2.3	1.1	11.9
1.3125	6.1	0.3	-0.1	-0.5	-1.3	-2.3	1.2	9.1
1.31944	5.7	0.4	-0.1	-0.5	-1.3	-2.3	1.4	9.1
1.32639	5.3	0.4	-0.1	-0.6	-1.3	-2.2	1.4	8.6
1.33333	5.2	0.4	-0.1	-0.6	-1.3	-2.2	1.4	7.8
1.34028	5.2	0.5	-0.1	-0.6	-1.3	-2.2	1.4	7.4
1.34722	5.2	0.5	0.1	-0.6	-1.3	-2.1	1.3	7.5
1.35417	5.2	0.5	0.1	-0.6	-1.3	-2.1	1.3	10.2
1.36111	5.2	0.6	0.1	-0.6	-1.3	-2.1	1.2	10.5
1.36806	5.1	0.6	0.1	-0.6	-1.3	-2	1.4	10.3
1.375	5	0.7	0.1	-0.6	-1.3	-2	1.5	10
1.38194	4.9	0.7	0.2	-0.6	-1.3	-1.9	1.8	9.7
1.38889	4.8	0.7	0.2	-0.6	-1.3	-1.9	2	9.5
1.39583	4.6	0.8	0.2	-0.6	-1.3	-1.9	2	9.3
1.40278	4.5	0.8	0.2	-0.6	-1.3	-1.8	2.1	8.9
1.40972	4.4	0.8	0.2	-0.6	-1.3	-1.8	2.1	8.6
1.41667	4.2	0.8	0.2	-0.6	-1.3	-1.8	2.1	7.8
1.42361	4.1	0.9	0.2	-0.6	-1.3	-1.7	2.1	7.9
1.43056	4	0.9	0.2	-0.6	-1.3	-1.7	2.1	7.9
1.4375	3.8	0.9	0.2	-0.6	-1.3	-1.6	2	7.7
1.44444	3.7	0.9	0.3	-0.6	-1.3	-1.6	1.9	7.1
1.45139	3.5	1	0.3	-0.6	-1.3	-1.5	1.8	6.5
1.45833	3.3	1	0.3	-0.6	-1.3	-1.5	1.8	6.3
1.46528	3	1	0.3	-0.6	-1.3	-1.5	1.7	5.5
1.47222	2.8	1	0.3	-0.6	-1.3	-1.4	1.7	4.6
1.47917	2.6	1.1	0.3	-0.6	-1.3	-1.4	1.5	4.3
1.48611	2.4	1.1	0.3	-0.6	-1.3	-1.3	1.4	3.8
1.49306	2.4	1.1	0.3	-0.6	-1.3	-1.3	1.3	2.7
1.5	2.4	1.1	0.3	-0.6	-1.3	-1.3	1.2	3.2
1.50694	2.4	1.2	0.3	-0.6	-1.3	-1.2	1	3.8
1.51389	2.5	1.2	0.4	-0.6	-1.3	-1.2	0.9	3.8
1.52083	2.5	1.2	0.4	-0.6	-1.3	-1.2	0.7	4.9
1.52778	2.5	1.2	0.4	-0.6	-1.3	-1.1	0.6	5
1.53472	2.5	1.2	0.4	-0.6	-1.3	-1.1	0.5	4.6
1.54167	2.5	1.2	0.4	-0.6	-1.3	-1	0.6	5.1
1.54861	2.4	1.2	0.4	-0.6	-1.3	-1	0.6	5
1.55556	2.3	1.3	0.4	-0.6	-1.3	-1	0.7	4.8
1.5625	2.2	1.3	0.4	-0.6	-1.3	-0.9	0.7	4.5
1.56944	2	1.3	0.4	-0.6	-1.3	-0.9	0.7	3.6
1.57639	1.9	1.3	0.4	-0.6	-1.3	-0.9	0.7	2.6
1.58333	1.8	1.3	0.4	-0.6	-1.3	-0.8	0.7	2.6
1.59028	1.7	1.3	0.4	-0.6	-1.3	-0.8	0.7	2.5
1.59722	1.6	1.3	0.4	-0.6	-1.3	-0.8	0.6	2.4
1.60417	1.5	1.3	0.4	-0.6	-1.3	-0.7	0.4	2.2
1.61111	1.3	1.4	0.4	-0.6	-1.3	-0.7	0.3	1.8
1.61806	1.2	1.4	0.4	-0.6	-1.3	-0.7	0.3	2
1.625	1.1	1.4	0.5	-0.6	-1.3	-0.7	0.2	1.7
1.63194	0.9	1.4	0.5	-0.6	-1.3	-0.6	0.1	1.3
1.63889	0.7	1.4	0.5	-0.5	-1.3	-0.6	-0.1	1.5
1.64583	0.5	1.4	0.5	-0.5	-1.2	-0.6	-0.2	0.7
1.65278	0.4	1.4	0.5	-0.5	-1.2	-0.6	-0.3	-0.5
1.65972	0.2	1.4	0.5	-0.5	-1.2	-0.5	-0.4	-1.2
1.66667	-0.1	1.4	0.5	-0.5	-1.2	-0.5	-0.5	-1.1
1.67361	-0.2	1.4	0.5	-0.5	-1.2	-0.5	-0.7	-1.7
1.68056	-0.4	1.4	0.5	-0.5	-1.2	-0.5	-0.8	-1.3
1.6875	-0.5	1.4	0.5	-0.5	-1.2	-0.5	-0.9	-2
1.69444	-0.6	1.4	0.5	-0.5	-1.2	-0.5	-1.1	-2.3
1.70139	-0.7	1.4	0.5	-0.5	-1.2	-0.4	-1.2	-2.6
1.70833	-0.8	1.4	0.5	-0.5	-1.2	-0.4	-1.3	-1.9
1.71528	-1	1.4	0.5	-0.5	-1.2	-0.4	-1.4	-3.2
1.72222	-1.1	1.4	0.5	-0.4	-1.1	-0.4	-1.5	-3
1.72917	-1.2	1.4	0.5	-0.4	-1.1	-0.4	-1.6	-3
1.73611	-1.3	1.4	0.5	-0.4	-1.1	-0.4	-1.7	-3.7
1.74306	-1.3	1.3	0.5	-0.4	-1.1	-0.4	-1.8	-3.7
1.75	-1.4	1.3	0.5	-0.4	-1.1	-0.4	-1.9	-3.2
1.75694	-1.5	1.3	0.5	-0.4	-1.1	-0.4	-2	-4.2
1.76389	-1.6	1.3	0.5	-0.4	-1.1	-0.4	-2.1	-4.1
1.77083	-1.7	1.3	0.4	-0.4	-1.1	-0.3	-2.2	-4.1
1.77778	-1.8	1.3	0.4	-0.4	-1.1	-0.3	-2.3	-4.1
1.78472	-1.9	1.3	0.4	-0.4	-1.1	-0.3	-2.3	-4.5
1.79167	-2	1.3	0.4	-0.3	-1	-0.3	-2.4	-4.5
1.79861	-2	1.3	0.4	-0.3	-1	-0.3	-2.5	-4.6
1.80556	-2.1	1.2	0.4	-0.3	-1	-0.3	-2.6	-4.2
1.8125	-2.2	1.2	0.4	-0.3	-1	-0.3	-2.7	-4.2
1.81944	-2.3	1.2	0.4	-0.3	-1	-0.3	-2.8	-5.2
1.82639	-2.4	1.2	0.4	-0.3	-1	-0.3	-2.9	-5.4
1.83333	-2.5	1.2	0.3	-0.3	-1	-0.3	-3	-5.1
1.84028	-2.5	1.2	0.3	-0.3	-1	-0.3	-3.1	-5.7
1.84722	-2.6	1.2	0.3	-0.3	-1	-0.3	-3.1	-5.7
1.85417	-2.7	1.2	0.3	-0.2	-0.9	-0.4	-3.2	-5.8
1.86111	-2.7	1.1	0.3	-0.2	-0.9	-0.4	-3.3	-5.9
1.86806	-2.8	1.1	0.3	-0.2	-0.9	-0.4	-3.4	-5.2
1.875	-2.9	1.1	0.3	-0.2	-0.9	-0.4	-3.4	-5.6
1.88194	-2.9	1.1	0.3	-0.2	-0.9	-0.4	-3.5	-6.3
1.88889	-3	1.1	0.3	-0.2	-0.9	-0.4	-3.6	-5.6
1.89583	-3.1	1	0.3	-0.2	-0.9	-0.4	-3.7	-5.7
1.90278	-3.2	1	0.3	-0.2	-0.9	-0.4	-3.7	-6.5
1.90972	-3.2	1	0.3	-0.2	-0.9	-0.4	-3.8	-6.5
1.91667	-3.3	1	0.3	-0.2	-0.9	-0.4	-3.9	-6.3
1.92361	-3.4	1	0.3	-0.1	-0.8	-0.4	-4	-6
1.93056	-3.4	1	0.3	-0.1	-0.8	-0.4	-4.1	-6.4
1.9375	-3.5	0.9	0.3	-0.1	-0.8	-0.5	-4.2	-6.3
1.94444	-3.6	0.9	0.3	-0.1	-0.8	-0.5	-4.2	-6.5
1.95139	-3.7	0.9	0.4	-0.1	-0.8	-0.5	-4.3	-6.5
1.95833	-3.7	0.9	0.4	-0.1	-0.8	-0.5	-4.4	-6.8
1.96528	-3.8	0.9	0.4	-0.1	-0.8	-0.5	-4.5	-6.7
1.97222	-3.9	0.8	0.4	-0.1	-0.8	-0.5	-4.6	-7
1.97917	-3.9	0.8	0.4	-0.1	-0.8	-0.5	-4.6	-7.5
1.98611	-4	0.8	0.4	-0.1	-0.8	-0.5	-4.7	-7.4
1.99306	-4	0.8	0.4	-0.1	-0.8	-0.6	-4.8	-7.3
2	-4.1	0.8	0.4	-0.1	-0.8	-0.6	-4.9	-7.1
2.00694	-4.1	0.8	0.4	0.1	-0.7	-0.6	-4.9	-7
2.01389	-4.2	0.7	0.4	0.1	-0.7	-0.6	-5	-7.3
2.02083	-4.2	0.7	0.4	0.1	-0.7	-0.6	-5.1	-7.4
2.02778	-4.2	0.6	0.4	0.1	-0.7	-0.6	-5.1	-7.4
2.03472	-4.2	0.6	0.5	0.1	-0.7	-0.7	-5.2	-7.3
2.04167	-4	0.6	0.5	0.1	-0.7	-0.7	-5.2	-7.3
2.04861	-3.5	0.6	0.5	0.2	-0.7	-0.7	-5.2	-7.4
2.05556	-2.9	0.6	0.5	0.2	-0.7	-0.7	-5.2	-7.1
2.0625	-2.3	0.7	0.5	0.2	-0.7	-0.7	-5.2	-6.6
2.06944	-1.7	0.7	0.5	0.2	-0.7	-0.8	-5.2	0.3
2.07639	-1.1	0.7	0.5	0.2	-0.7	-0.8	-5.2	0.4
2.08333	-0.4	0.7	0.5	0.2	-0.7	-0.8	-5.1	1.1
2.09028	7.8	0.7	0.6	0.2	-0.7	-0.8	-4.9	1.7
2.09722	8	0.8	0.6	0.1	-0.7	-0.8	-4.7	3.8
2.10417	8.2	0.8	0.6	0.1	-0.7	-0.9	-4.5	4
2.11111	8.3	0.8	0.6	0.1	-0.7	-0.9	-4.2	5.4
2.11806	8.3	0.8	0.6	0.1	-0.7	-0.9	-4	7.5
2.125	8.3	0.9	0.6	0.1	-0.7	-0.9	-3.8	16.6
2.13194	8.3	0.9	0.7	0.1	-0.7	-1	-3.5	18
2.13889	8.2	0.9	0.7	0.1	-0.6	-1	1.6	16.6
2.14583	8.1	1	0.7	0.1	-0.6	-1.2	1.9	16.5
2.15278	7.7	1	0.7	0.1	-0.6	-1.1	2.1	15
2.15972	7.1	1	0.7	0.1	-0.6	-1.1	2.4	15
2.16667	6.6	1.1	0.7	0.1	-0.6	-1.1	2.6	14.2
2.17361	6.1	1.1	0.7	0.1	-0.6	-1.1	2.8	16.6
2.18056	5.7	1.1	0.8	0.1	-0.6	-1.1	3	11
2.1875	5.4	1.2	0.8	0.1	-0.6	-1.1	3.1	10.2
2.19444	5.1	1.2	0.8	0.1	-0.7	-1	3	9.1
2.20139	4.9	1.2	0.8	0.1	-0.7	-1	3	8.7
2.20833	4.7	1.3	0.8	0.1	-0.7	-1	2.9	8.3
2.21528	4.6	1.3	0.8	0.1	-0.7	-0.9	2.8	8.3
2.22222	4.4	1.3	0.8	0.1	-0.7	-0.9	2.7	7.7
2.22917	4.3	1.4	0.8	0.1	-0.7	-0.9	2.7	7.5
2.23611	4.1	1.4	0.8	0.2	-0.7	-0.8	2.6	7.2
2.24306	4	1.4	0.9	0.2	-0.7	-0.8	2.5	6.9
2.25	3.9	1.5	0.9	0.2	-0.7	-0.7	2.5	6.6
2.25694	3.8	1.5	0.9	0.2	-0.7	-0.7	2.4	6.6
2.26389	3.7	1.5	0.9	0.2	-0.7	-0.7	2.4	6.1
2.27083	3.5	1.5	0.9	0.2	-0.7	-0.6	2.3	6
2.27778	3.4	1.5	0.9	0.2	-0.7	-0.6	2.2	5.9
2.28472	3.2	1.6	0.9	0.2	-0.7	-0.6	2.2	5.6
2.29167	3.1	1.6	0.9	0.2	-0.7	-0.5	2.1	5.3
2.29861	3	1.6	0.9	0.2	-0.7	-0.5	2	4.9
2.30556	2.9	1.7	0.9	0.2	-0.7	-0.4	1.9	4.8
2.3125	2.8	1.7	0.9	0.2	-0.7	-0.4	1.8	4.4
2.31944	2.7	1.7	1	0.2	-0.7	-0.4	1.7	4.1
2.32639	2.6	1.7	1	0.2	-0.7	-0.3	1.5	4
2.33333	2.4	1.7	1	0.2	-0.7	-0.3	1.4	4
2.34028	2.3	1.7	1	0.2	-0.7	-0.3	1.4	3.6
2.34722	2.2	1.8	1	0.2	-0.7	-0.2	1.2	3.3
2.35417	2.1	1.8	1	0.2	-0.7	-0.2	1.2	3.2
2.36111	1.9	1.8	1	0.2	-0.7	-0.2	1	2.9
2.36806	1.8	1.8	1	0.3	-0.7	-0.1	0.9	2.4
2.375	1.7	1.8	1	0.3	-0.6	-0.1	0.8	2.3
2.38194	1.6	1.8	1	0.3	-0.6	-0.1	0.7	2.3
2.38889	1.4	1.8	1	0.3	-0.6	0.1	0.6	1.7
2.39583	1.3	1.8	1	0.3	-0.6	0.1	0.5	1.4
2.40278	1.2	1.8	1	0.3	-0.6	0.1	0.4	1.5
2.40972	1	1.8	1	0.3	-0.6	0.2	0.3	1
2.41667	0.8	1.8	1	0.3	-0.6	0.2	0.2	0.4
2.42361	0.7	1.9	1	0.3	-0.6	0.2	0.1	0.6
2.43056	0.5	1.9	1	0.3	-0.6	0.2	-0.2	0.1
2.4375	0.4	1.9	1	0.3	-0.6	0.2	-0.3	0.1
2.44444	0.3	1.9	1	0.3	-0.6	0.2	-0.4	-0.8
2.45139	0.1	1.9	1.1	0.4	-0.6	0.3	-0.5	-1.3
2.45833	-0.1	1.9	1.1	0.4	-0.6	0.3	-0.6	-1.7
2.46528	-0.2	1.9	1.1	0.4	-0.6	0.3	-0.8	-1.2
2.47222	-0.3	1.9	1.1	0.4	-0.6	0.3	-0.9	-1.4
2.47917	-0.4	1.9	1.1	0.4	-0.5	0.3	-1	-1.9
2.48611	-0.6	1.9	1.1	0.4	-0.5	0.3	-1.1	-1.9
2.49306	-0.7	1.9	1.1	0.4	-0.5	0.3	-1.2	-2.3
2.5	-0.8	1.9	1.1	0.4	-0.5	0.3	-1.3	-2.9
2.50694	-0.9	1.9	1.1	0.4	-0.5	0.3	-1.4	-3.2
2.51389	-1	1.9	1.1	0.4	-0.5	0.3	-1.5	-3.4
2.52083	-1.1	1.8	1.1	0.4	-0.5	0.3	-1.7	-3.5
2.52778	-1.2	1.8	1	0.5	-0.5	0.3	-1.8	-3.8
2.53472	-1.3	1.8	1	0.5	-0.5	0.4	-1.9	-3.1
2.54167	-1.4	1.8	1	0.5	-0.5	0.4	-2	-3.2
2.54861	-1.5	1.8	1	0.5	-0.4	0.4	-2.1	-4.1
2.55556	-1.6	1.8	1	0.5	-0.4	0.4	-2.2	-4.3
2.5625	-1.7	1.8	1	0.5	-0.4	0.4	-2.3	-4.8
2.56944	-1.8	1.8	1	0.5	-0.4	0.3	-2.4	-3.9
2.57639	-1.9	1.8	1	0.5	-0.4	0.3	-2.5	-4
2.58333	-2	1.8	1	0.5	-0.4	0.3	-2.6	-4.5
2.59028	-2.1	1.8	1	0.5	-0.4	0.3	-2.7	-4.7
2.59722	-2.2	1.8	1	0.6	-0.4	0.3	-2.9	-4.9
2.60417	-2.3	1.7	1	0.6	-0.4	0.3	-2.9	-5
2.61111	-2.4	1.7	1	0.6	-0.4	0.3	-3.1	-5.7
2.61806	-2.5	1.7	1	0.6	-0.4	0.3	-3.2	-5.3
2.625	-2.6	1.7	1	0.6	-0.3	0.3	-3.3	-5.8
2.63194	-2.7	1.7	1	0.6	-0.3	0.3	-3.4	-5.8
2.63889	-2.7	1.7	1	0.6	-0.3	0.3	-3.5	-6.5
2.64583	-2.8	1.7	1	0.6	-0.3	0.3	-3.5	-5.9
2.65278	-2.8	1.7	1	0.7	-0.3	0.3	-3.6	-6.8
2.65972	-2.9	1.6	1	0.7	-0.3	0.2	-3.7	-7
2.66667	-2.9	1.6	1	0.7	-0.3	0.2	-3.7	-6
2.67361	-3	1.6	1	0.7	-0.3	0.2	-3.8	-6.1
2.68056	-3	1.6	1	0.7	-0.3	0.2	-3.9	-6
2.6875	-3.1	1.5	0.9	0.7	-0.3	0.2	-3.9	-6.5
2.69444	-3.1	1.5	0.9	0.7	-0.2	0.2	-4	-6.4
2.70139	-3.2	1.5	0.9	0.7	-0.2	0.2	-4	-6.4
2.70833	-3.2	1.5	0.9	0.7	-0.2	0.1	-4.1	-6.3
2.71528	-3.2	1.5	0.9	0.7	-0.2	0.1	-4.2	-6.5
2.72222	-3.2	1.5	0.9	0.7	-0.2	0.1	-4.2	-6.5
2.72917	-3.2	1.4	0.9	0.7	-0.2	-0.1	-4.3	-6.3
2.73611	-3.2	1.4	0.9	0.7	-0.2	-0.1	-4.3	-6.2
2.74306	-3.3	1.4	0.9	0.7	-0.2	-0.1	-4.3	-6
2.75	-3.3	1.4	0.9	0.7	-0.2	-0.1	-4.3	-6
2.75694	-3.4	1.4	0.9	0.7	-0.2	-0.1	-4.3	-6.1
2.76389	-3.4	1.3	0.8	0.8	-0.2	-0.2	-4.4	-6.9
2.77083	-3.5	1.3	0.8	0.8	-0.2	-0.2	-4.4	-7
2.77778	-3.5	1.3	0.8	0.8	-0.2	-0.2	-4.5	-6.8
2.78472	-3.6	1.3	0.8	0.8	-0.2	-0.2	-4.5	-6.6
2.79167	-3.7	1.2	0.8	0.8	-0.1	-0.3	-4.5	-6.6
2.79861	-3.7	1.2	0.8	0.8	-0.1	-0.3	-4.6	-6.6
2.80556	-3.8	1.2	0.8	0.8	-0.1	-0.3	-4.7	-6.7
2.8125	-3.8	1.2	0.8	0.8	-0.1	-0.3	-4.7	-7.4
2.81944	-3.9	1.2	0.8	0.8	-0.1	-0.4	-4.7	-7.6
2.82639	-3.9	1.1	0.8	0.8	-0.1	-0.4	-4.8	-7.7
2.83333	-4	1.1	0.8	0.8	-0.1	-0.4	-4.9	-7.1
2.84028	-4	1.1	0.8	0.8	-0.1	-0.4	-4.9	-6.9
2.84722	-4	1	0.8	0.8	-0.1	-0.5	-5	-7.1
2.85417	-4	1	0.7	0.8	-0.1	-0.5	-5	-7.2
2.86111	-4	1	0.7	0.8	-0.1	-0.5	-5.1	-7.2
2.86806	-4	1	0.7	0.8	-0.1	-0.5	-5.2	-7.2
2.875	-4	1	0.7	0.8	-0.1	-0.6	-5.2	-6.9
2.88194	-4.1	0.9	0.7	0.8	-0.1	-0.6	-5.2	-6.9
2.88889	-4.1	0.9	0.7	0.8	-0.1	-0.6	-5.2	-6.9
2.89583	-4.1	0.9	0.7	0.8	-0.1	-0.6	-5.3	-6.8
2.90278	-4.1	0.9	0.7	0.8	-0.1	-0.7	-5.3	-6.9
2.90972	-4.1	0.9	0.7	0.8	-0.1	-0.7	-5.3	-6.9
2.91667	-3.9	0.9	0.7	0.8	-0.1	-0.7	-5.3	-6.7
2.92361	-3.5	0.8	0.7	0.8	-0.1	-0.7	-5.3	-6.4
2.93056	-3	0.8	0.7	0.8	-0.1	-0.8	-5.3	-6.8
2.9375	-2.3	0.8	0.7	0.8	-0.1	-0.8	-5.3	-6.5
2.94444	-1.8	0.8	0.7	0.8	-0.1	-0.8	-5.3	0.4
2.95139	-1.1	0.8	0.7	0.8	-0.1	-0.8	-5.2	1
2.95833	-0.5	0.8	0.7	0.8	-0.1	-0.9	-5	2.8
2.96528	0.2	0.8	0.7	0.8	-0.1	-0.9	-4.7	6.5
2.97222	0.9	0.8	0.7	0.8	-0.1	-0.9	-4.5	5.3
2.97917	1.7	0.8	0.7	0.8	-0.1	-0.9	-4.3	7.9
2.98611	2.4	0.7	0.7	0.8	-0.1	-0.9	-4.1	8.5
2.99306	3	0.7	0.7	0.8	-0.1	-1	-3.9	10.2
3	3.5	0.7	0.7	0.8	-0.1	-1	-3.6	11.7
3.00694	4.1	0.7	0.7	0.8	-0.1	-1	-3.4	13
3.01389	4.7	0.7	0.7	0.8	-0.1	-1	-3.1	12.8
3.02083	5.2	0.8	0.7	0.8	-0.1	-1	-2.8	15.5
3.02778	5.8	0.8	0.8	0.8	-0.1	-1	-2.6	15.5
3.03472	6.5	0.8	0.8	0.8	-0.1	-1	-2.3	19.2
3.04167	7	0.8	0.8	0.8	-0.1	-1	-1.9	17
3.04861	7	0.8	0.8	0.8	-0.1	-1	-1.6	17.4
3.05556	6.8	0.8	0.8	0.7	-0.1	-1	-1.2	15.9
3.0625	6.3	0.8	0.8	0.7	-0.1	-1	-0.7	17.9
3.06944	5.8	0.8	0.8	0.7	-0.1	-1	-0.3	12.6
3.07639	5.4	0.8	0.8	0.7	-0.1	-1	0.1	10.4
3.08333	5.1	0.9	0.8	0.7	-0.1	-1	0.2	10.2
3.09028	4.8	0.9	0.8	0.7	-0.1	-1	0.3	6.4
3.09722	4.5	0.9	0.8	0.7	-0.1	-1	0.4	7.1
3.10417	4.2	0.9	0.8	0.7	-0.1	-1	0.5	7.8
3.11111	4.1	0.9	0.8	0.7	-0.1	-1	0.6	6.1
3.11806	3.9	1	0.8	0.7	-0.1	-1	0.6	5.3
3.125	3.7	1	0.8	0.7	-0.1	-0.9	0.7	5
3.13194	3.5	1	0.8	0.7	-0.1	-0.9	0.7	5
3.13889	3.4	1	0.8	0.7	-0.1	-0.9	0.8	5.2
3.14583	3.3	1	0.8	0.7	-0.1	-0.9	0.7	4.7
3.15278	3.3	1	0.9	0.7	-0.1	-0.9	0.6	4.8
3.15972	3.3	1.1	0.9	0.7	-0.2	-0.8	0.5	4.7
3.16667	3.2	1.1	0.9	0.7	-0.2	-0.8	0.6	5.1
3.17361	3.1	1.1	0.9	0.7	-0.2	-0.8	0.8	5.2
3.18056	3	1.1	0.9	0.7	-0.2	-0.8	0.8	5.5
3.1875	3	1.2	0.9	0.7	-0.2	-0.8	0.7	6.1
3.19444	3	1.2	0.9	0.7	-0.2	-0.7	0.7	4.4
3.20139	3	1.2	0.9	0.7	-0.2	-0.7	0.6	5.3
3.20833	2.9	1.2	0.9	0.7	-0.2	-0.7	0.6	5.2
3.21528	2.9	1.2	0.9	0.7	-0.2	-0.7	0.7	5.8
3.22222	2.8	1.2	0.9	0.7	-0.2	-0.7	0.7	5.8
3.22917	2.6	1.3	0.9	0.7	-0.2	-0.7	0.7	4.7
3.23611	2.5	1.3	0.9	0.7	-0.2	-0.6	0.7	4.5
3.24306	2.4	1.3	0.9	0.6	-0.2	-0.6	0.7	4.7
3.25	2.3	1.3	0.9	0.6	-0.2	-0.6	0.6	3.9
3.25694	2.2	1.3	0.9	0.6	-0.2	-0.6	0.5	3.6
3.26389	2	1.4	0.9	0.6	-0.2	-0.6	0.5	3.4
3.27083	1.9	1.4	0.9	0.6	-0.2	-0.5	0.4	3.3
3.27778	1.7	1.4	0.9	0.6	-0.2	-0.5	0.4	3
3.28472	1.5	1.4	0.9	0.6	-0.2	-0.5	0.3	2.7
3.29167	1.3	1.4	0.9	0.6	-0.2	-0.5	0.2	2.3
3.29861	1.1	1.4	0.9	0.6	-0.2	-0.5	-0.1	1.9
3.30556	0.9	1.4	0.9	0.6	-0.2	-0.5	-0.3	1.3
3.3125	0.7	1.4	0.9	0.6	-0.2	-0.5	-0.4	0.5
3.31944	0.5	1.4	0.9	0.6	-0.2	-0.4	-0.6	-0.1
3.32639	0.3	1.4	0.9	0.6	-0.2	-0.4	-0.7	-0.3
3.33333	0.2	1.4	0.9	0.6	-0.2	-0.4	-0.8	-0.9
3.34028	-0.1	1.4	0.9	0.6	-0.2	-0.4	-1	-1.2
3.34722	-0.2	1.5	0.9	0.6	-0.2	-0.4	-1.1	-1.1
3.35417	-0.4	1.5	0.9	0.6	-0.2	-0.4	-1.2	-1.4
3.36111	-0.5	1.5	0.9	0.6	-0.2	-0.4	-1.3	-2
3.36806	-0.6	1.5	0.9	0.6	-0.2	-0.4	-1.4	-1.9
3.375	-0.7	1.5	0.9	0.6	-0.2	-0.4	-1.5	-2
3.38194	-0.8	1.5	0.9	0.6	-0.2	-0.4	-1.6	-2.6
3.38889	-1	1.5	0.9	0.6	-0.2	-0.4	-1.8	-3
3.39583	-1.1	1.5	0.9	0.7	-0.2	-0.3	-1.9	-2.8
3.40278	-1.2	1.5	0.9	0.7	-0.2	-0.3	-1.9	-3.4
3.40972	-1.3	1.5	0.9	0.7	-0.2	-0.3	-2.1	-3.3
3.41667	-1.3	1.5	0.9	0.7	-0.2	-0.3	-2.2	-3.6
3.42361	-1.4	1.5	0.9	0.7	-0.2	-0.3	-2.3	-3.9
3.43056	-1.5	1.5	0.9	0.7	-0.2	-0.3	-2.3	-3.9
3.4375	-1.6	1.5	0.9	0.7	-0.2	-0.3	-2.4	-4.2
3.44444	-1.7	1.4	0.9	0.7	-0.2	-0.3	-2.5	-3.5
3.45139	-1.8	1.4	0.9	0.7	-0.2	-0.3	-2.6	-4
3.45833	-1.9	1.4	0.9	0.7	-0.2	-0.3	-2.7	-4.5
3.46528	-2	1.4	0.9	0.7	-0.2	-0.3	-2.8	-4.3
3.47222	-2.1	1.4	0.9	0.7	-0.2	-0.3	-2.9	-4.2
3.47917	-2.2	1.4	0.9	0.7	-0.2	-0.3	-3	-4.3
3.48611	-2.3	1.4	0.9	0.7	-0.2	-0.3	-3.1	-5.2
3.49306	-2.3	1.4	0.9	0.7	-0.2	-0.4	-3.2	-5
3.5	-2.4	1.4	0.9	0.7	-0.2	-0.4	-3.3	-5.7
3.50694	-2.5	1.4	0.9	0.7	-0.2	-0.4	-3.4	-5.2
3.51389	-2.6	1.4	0.8	0.7	-0.2	-0.4	-3.5	-5.8
3.52083	-2.7	1.4	0.8	0.7	-0.2	-0.4	-3.5	-5.3
3.52778	-2.8	1.3	0.8	0.7	-0.2	-0.4	-3.6	-6.1
3.53472	-2.9	1.3	0.8	0.7	-0.2	-0.4	-3.7	-5.8
3.54167	-2.9	1.3	0.8	0.7	-0.2	-0.4	-3.8	-6.1
3.54861	-3	1.3	0.8	0.7	-0.2	-0.4	-3.9	-6.3
3.55556	-3.1	1.3	0.8	0.7	-0.2	-0.4	-4	-6.1
3.5625	-3.2	1.3	0.8	0.7	-0.2	-0.4	-4	-6
3.56944	-3.3	1.2	0.8	0.7	-0.2	-0.4	-4.2	-6.3
3.57639	-3.3	1.2	0.8	0.7	-0.2	-0.5	-4.2	-6.3
3.58333	-3.4	1.2	0.8	0.7	-0.2	-0.5	-4.3	-6.6
3.59028	-3.5	1.2	0.8	0.7	-0.1	-0.5	-4.4	-7.2
3.59722	-3.5	1.2	0.7	0.7	-0.1	-0.5	-4.5	-6.8
3.60417	-3.6	1.2	0.7	0.7	-0.1	-0.5	-4.6	-6.7
3.61111	-3.7	1.1	0.7	0.7	-0.1	-0.5	-4.6	-7.1
3.61806	-3.8	1.1	0.7	0.7	-0.1	-0.5	-4.7	-7.2
3.625	-3.8	1.1	0.7	0.7	-0.1	-0.6	-4.8	-7.4
3.63194	-3.9	1.1	0.7	0.7	-0.1	-0.6	-4.8	-7.5
3.63889	-4	1.1	0.7	0.7	-0.1	-0.6	-4.9	-7.3
3.64583	-4	1	0.7	0.7	-0.1	-0.6	-5	-7.8
3.65278	-4.1	1	0.7	0.7	-0.1	-0.6	-5	-7.6
3.65972	-4.2	1	0.7	0.7	-0.1	-0.6	-5.1	-7.4
3.66667	-4.2	1	0.6	0.7	-0.1	-0.7	-5.2	-7.9
3.67361	-4.3	1	0.6	0.7	-0.1	-0.7	-5.2	-8.1
3.68056	-4.4	0.9	0.6	0.7	-0.1	-0.7	-5.3	-7.9
3.6875	-4.4	0.9	0.6	0.7	-0.1	-0.7	-5.4	-8.4
3.69444	-4.5	0.9	0.6	0.7	-0.1	-0.7	-5.4	-8.8
3.70139	-4.6	0.9	0.5	0.7	-0.1	-0.8	-5.5	-8.1
3.70833	-4.6	0.8	0.5	0.7	-0.1	-0.8	-5.6	-8.2
3.71528	-4.7	0.8	0.5	0.7	-0.1	-0.8	-5.7	-8.3
3.72222	-4.8	0.8	0.5	0.7	-0.1	-0.8	-5.8	-8.2
3.72917	-4.9	0.8	0.5	0.7	-0.1	-0.9	-5.9	-8.3
3.73611	-4.9	0.8	0.5	0.7	-0.1	-0.9	-6	-8.5
3.74306	-5	0.7	0.5	0.7	-0.1	-0.9	-6.1	-8.7
3.75	-5.1	0.7	0.4	0.7	-0.1	-0.9	-6.2	-8.9
3.75694	-5.1	0.7	0.4	0.7	-0.1	-1	-6.2	-9.1
3.76389	-5.2	0.7	0.4	0.7	-0.1	-1	-6.3	-9.1
3.77083	-5.2	0.6	0.4	0.7	-0.1	-1	-6.3	-9.2
3.77778	-5.3	0.6	0.4	0.7	-0.1	-1	-6.4	-9.3
3.78472	-5.4	0.6	0.4	0.7	-0.1	-1.1	-6.5	-9.3
3.79167	-5.4	0.5	0.4	0.7	-0.1	-1.1	-6.5	-9.3
3.79861	-5.5	0.5	0.3	0.7	-0.1	-1.1	-6.6	-9.8
3.80556	-5.5	0.5	0.3	0.7	-0.1	-1.1	-6.6	-9.9
3.8125	-5.5	0.5	0.3	0.7	-0.1	-1.2	-6.7	-9.5
3.81944	-5.6	0.4	0.3	0.7	-0.1	-1.2	-6.7	-9.7
3.82639	-5.7	0.4	0.3	0.7	-0.1	-1.2	-6.8	-9.5
3.83333	-5.7	0.4	0.3	0.7	-0.1	-1.3	-6.8	-9.6
3.84028	-5.7	0.4	0.3	0.7	-0.1	-1.3	-6.9	-9.7
3.84722	-5.7	0.3	0.3	0.7	-0.1	-1.3	-7	-9.6
3.85417	-5.8	0.3	0.2	0.7	-0.1	-1.3	-7	-9.8
3.86111	-5.8	0.3	0.2	0.7	-0.1	-1.4	-7.1	-9.8
3.86806	-5.8	0.3	0.2	0.6	-0.1	-1.4	-7.1	-9.7
3.875	-5.8	0.2	0.2	0.6	-0.1	-1.4	-7.2	-9.7
3.88194	-5.8	0.2	0.2	0.6	-0.1	-1.4	-7.2	-9.7
3.88889	-5.7	0.2	0.2	0.6	-0.1	-1.5	-7.3	-9
3.89583	-5.7	0.2	0.2	0.6	-0.2	-1.5	-7.3	-9.3
3.90278	-5.6	0.1	0.2	0.6	-0.2	-1.5	-7.2	-9.4
3.90972	-5.4	0.1	0.2	0.6	-0.2	-1.6	-7.2	-8.9
3.91667	-5.2	0.1	0.2	0.6	-0.2	-1.6	-7.2	-8.9
3.92361	-4.7	-0.1	0.1	0.6	-0.2	-1.6	-7.1	-8.2
3.93056	-4.1	-0.1	0.1	0.6	-0.2	-1.7	-7.1	-7.8
3.9375	-3.5	-0.1	0.1	0.6	-0.2	-1.7	-6.9	-3.5
3.94444	-2.9	-0.1	0.1	0.6	-0.2	-1.7	-6.7	-3
3.95139	-2.3	-0.1	0.1	0.6	-0.2	-1.8	-6.4	0.6
3.95833	-1.7	-0.1	0.1	0.6	-0.2	-1.8	-6.2	2.2
3.96528	-1.1	-0.1	0.1	0.5	-0.2	-1.8	-6	3
3.97222	-0.6	-0.1	0.1	0.5	-0.2	-1.9	-5.7	3.6
3.97917	-0.1	-0.1	0.1	0.5	-0.2	-1.9	-5.5	5.3
3.98611	0.3	-0.1	0.1	0.5	-0.2	-1.9	-5.2	6.4
3.99306	0.7	-0.1	0.1	0.5	-0.2	-1.9	-4.9	7.7
4	1	-0.1	0.1	0.5	-0.2	-1.9	-4.7	8.4
4.00694	1.4	-0.1	0.1	0.5	-0.2	-2	-4.4	9
4.01389	1.7	-0.1	0.1	0.5	-0.3	-2	-4.2	9.6
4.02083	1.8	-0.1	0.1	0.5	-0.3	-2	-3.9	9.3
4.02778	1.9	-0.1	0.1	0.5	-0.3	-2	-3.6	8.7
4.03472	2	-0.1	0.1	0.5	-0.3	-2	-3.4	10.1
4.04167	2.3	-0.1	0.1	0.4	-0.3	-2	-3.2	8.9
4.04861	2.6	-0.1	0.1	0.4	-0.3	-2.1	-3.1	8.7
4.05556	2.9	-0.1	0.1	0.4	-0.3	-2.1	-2.9	7.7
4.0625	3.2	-0.1	0.1	0.4	-0.3	-2.1	-2.6	9.2
4.06944	3.5	0.1	0.1	0.4	-0.3	-2.1	-2.3	12.1
4.07639	3.7	0.1	0.1	0.4	-0.3	-2.1	-2	8.7
4.08333	3.8	0.1	0.1	0.4	-0.3	-2.1	-1.6	10.6
4.09028	3.8	0.1	0.1	0.4	-0.4	-2.1	-1.3	12.5
4.09722	3.6	0.2	0.1	0.4	-0.4	-2.1	-1.1	11.8
4.10417	3.5	0.2	0.1	0.3	-0.4	-2.1	-0.8	10.7
4.11111	3.4	0.2	0.1	0.3	-0.4	-2.1	-0.6	10.7
4.11806	3.3	0.2	0.1	0.3	-0.4	-2	-0.5	7.6
4.125	3.2	0.2	0.1	0.3	-0.4	-2	-0.4	8.1
4.13194	3.2	0.2	0.1	0.3	-0.4	-2	-0.3	7.6
4.13889	3	0.3	0.1	0.3	-0.4	-2	-0.3	6.6
4.14583	3	0.3	0.1	0.3	-0.4	-2	-0.2	7.2
4.15278	2.9	0.3	0.1	0.3	-0.4	-2	-0.1	7
4.15972	2.8	0.3	0.1	0.3	-0.5	-1.9	0.1	6.9
4.16667	2.8	0.3	0.1	0.3	-0.5	-1.9	0.1	6.3
4.17361	2.6	0.3	0.1	0.2	-0.5	-1.9	0.1	6.4
4.18056	2.5	0.4	0.1	0.2	-0.5	-1.9	0.2	6
4.1875	2.4	0.4	0.1	0.2	-0.5	-1.9	0.1	6.1
4.19444	2.2	0.4	0.2	0.2	-0.5	-1.9	0.1	5.8
4.20139	2.1	0.4	0.2	0.2	-0.5	-1.8	-0.1	5.2
4.20833	2	0.4	0.2	0.2	-0.5	-1.8	-0.1	4.4
4.21528	1.8	0.4	0.2	0.2	-0.6	-1.8	-0.2	4.5
4.22222	1.7	0.4	0.2	0.2	-0.6	-1.8	-0.2	4
4.22917	1.5	0.4	0.2	0.2	-0.6	-1.8	-0.3	3.7
4.23611	1.4	0.4	0.2	0.2	-0.6	-1.7	-0.3	3.5
4.24306	1.3	0.5	0.2	0.1	-0.6	-1.7	-0.4	2.9
4.25	1.1	0.5	0.2	0.1	-0.6	-1.7	-0.5	2.3
4.25694	1	0.5	0.2	0.1	-0.6	-1.7	-0.6	2.3
4.26389	0.8	0.5	0.2	0.1	-0.6	-1.7	-0.7	1.8
4.27083	0.7	0.5	0.2	0.1	-0.6	-1.6	-0.8	1.6
4.27778	0.5	0.5	0.2	0.1	-0.7	-1.6	-0.9	1.2
4.28472	0.3	0.5	0.2	0.1	-0.7	-1.6	-1	1
4.29167	0.2	0.5	0.2	0.1	-0.7	-1.6	-1.1	0.3
4.29861	0.1	0.5	0.2	0.1	-0.7	-1.6	-1.2	-0.2
4.30556	-0.1	0.5	0.2	0.1	-0.7	-1.5	-1.3	-0.4
4.3125	-0.2	0.5	0.2	0.1	-0.7	-1.5	-1.3	-0.6
4.31944	-0.2	0.5	0.2	0.1	-0.7	-1.5	-1.3	-0.8
4.32639	-0.3	0.5	0.2	-0.1	-0.7	-1.5	-1.4	-0.9
4.33333	-0.3	0.5	0.2	-0.1	-0.7	-1.5	-1.4	-0.8
4.34028	-0.4	0.5	0.2	-0.1	-0.7	-1.5	-1.5	-0.9
4.34722	-0.4	0.5	0.2	-0.1	-0.7	-1.5	-1.5	-0.9
4.35417	-0.4	0.5	0.2	-0.1	-0.7	-1.4	-1.5	-1
4.36111	-0.4	0.5	0.2	-0.1	-0.7	-1.4	-1.5	-1
4.36806	-0.5	0.5	0.2	-0.1	-0.8	-1.4	-1.6	-1
4.375	-0.5	0.5	0.2	-0.1	-0.8	-1.4	-1.6	-0.9
4.38194	-0.6	0.5	0.2	-0.1	-0.8	-1.4	-1.7	-0.9
4.38889	-0.6	0.5	0.2	-0.1	-0.8	-1.4	-1.7	-0.9
4.39583	-0.7	0.5	0.2	-0.1	-0.8	-1.4	-1.8	-1
4.40278	-0.7	0.5	0.2	-0.1	-0.8	-1.4	-1.9	-1.1
4.40972	-0.8	0.5	0.2	-0.1	-0.8	-1.4	-1.9	-1.1
4.41667	-0.9	0.5	0.2	-0.1	-0.8	-1.4	-1.9	-1.3
4.42361	-1	0.5	0.2	-0.1	-0.8	-1.4	-2	-1.3
4.43056	-1	0.5	0.2	-0.1	-0.8	-1.4	-2.1	-1.5
4.4375	-1.1	0.5	0.2	-0.1	-0.8	-1.4	-2.1	-1.6
4.44444	-1.2	0.5	0.2	-0.1	-0.8	-1.4	-2.2	-1.8
4.45139	-1.3	0.5	0.2	-0.1	-0.8	-1.4	-2.3	-1.8
4.45833	-1.4	0.5	0.1	-0.1	-0.8	-1.4	-2.4	-2
4.46528	-1.5	0.5	0.1	-0.1	-0.8	-1.4	-2.5	-2.1
4.47222	-1.6	0.5	0.1	-0.1	-0.8	-1.4	-2.6	-2.7
4.47917	-1.7	0.5	0.1	-0.1	-0.8	-1.4	-2.7	-2.7
4.48611	-1.8	0.5	0.1	-0.1	-0.8	-1.4	-2.7	-2.9
4.49306	-1.9	0.5	0.1	-0.1	-0.8	-1.4	-2.8	-3.5
4.5	-1.9	0.5	0.1	-0.1	-0.8	-1.4	-2.9	-3.2
4.50694	-2	0.4	0.1	-0.1	-0.8	-1.4	-3	-3.5
4.51389	-2	0.4	0.1	-0.1	-0.8	-1.4	-3	-3.5
4.52083	-2.1	0.4	0.1	-0.1	-0.8	-1.4	-3.1	-3.3
4.52778	-2.1	0.4	0.1	-0.1	-0.8	-1.4	-3.1	-3.7
4.53472	-2.1	0.4	0.1	-0.1	-0.8	-1.4	-3.2	-3.2
4.54167	-2.2	0.4	0.1	-0.1	-0.8	-1.4	-3.3	-3.2
4.54861	-2.3	0.4	0.1	-0.1	-0.8	-1.4	-3.4	-3.2
4.55556	-2.4	0.4	0.1	-0.1	-0.8	-1.4	-3.5	-3.1
4.5625	-2.5	0.4	-0.1	-0.2	-0.8	-1.4	-3.6	-3.2
4.56944	-2.6	0.4	-0.1	-0.2	-0.8	-1.4	-3.7	-3.9
4.57639	-2.6	0.3	-0.1	-0.2	-0.8	-1.4	-3.8	-4.1
4.58333	-2.7	0.3	-0.1	-0.2	-0.8	-1.4	-3.9	-4.1
4.59028	-2.8	0.3	-0.1	-0.2	-0.8	-1.4	-3.9	-4.3
4.59722	-2.9	0.3	-0.6	-0.2	-0.8	-1.4	-4	-4.4
4.60417	-3	0.3	-0.6	-0.2	-0.8	-1.4	-4.1	-4.7
4.61111	-3	0.3	-0.6	-0.2	-0.8	-1.4	-4.2	-4.8
4.61806	-3.1	0.3	-0.6	-0.2	-0.8	-1.5	-4.2	-4.9
4.625	-3.2	0.2	-0.6	-0.2	-0.8	-1.5	-4.3	-5.1
4.63194	-3.3	0.2	-0.6	-0.2	-0.8	-1.5	-4.4	-5.2
4.63889	-3.3	0.2	-0.6	-0.2	-0.8	-1.5	-4.5	-5.2
4.64583	-3.4	0.2	-0.5	-0.2	-0.8	-1.5	-4.5	-5.4
4.65278	-3.5	0.2	-0.5	-0.2	-0.8	-1.5	-4.6	-5.6
4.65972	-3.6	0.2	-0.5	-0.2	-0.8	-1.5	-4.7	-5.7
4.66667	-3.6	0.1	-0.5	-0.2	-0.8	-1.5	-4.8	-5.7
4.67361	-3.7	0.1	-0.5	-0.9	-0.8	-1.5	-4.9	-6
4.68056	-3.8	0.1	-0.5	-0.9	-0.8	-1.6	-4.9	-6.1
4.6875	-3.8	0.1	-0.5	-0.9	-0.8	-1.6	-5	-6.1
4.69444	-3.9	-0.1	-0.5	-0.9	-0.8	-1.6	-5	-6.4
4.70139	-3.9	-0.1	-0.5	-0.9	-0.8	-1.6	-5.1	-6.5
4.70833	-4	-0.1	-0.4	-0.9	-0.8	-1.6	-5.1	-6.3
4.71528	-4	-0.1	-0.4	-0.9	-0.8	-1.6	-5.1	-6.5
4.72222	-4	-0.1	-0.4	-0.9	-0.8	-1.6	-5.1	-6.5
4.72917	-4.1	-0.2	-0.4	-0.9	-0.8	-1.7	-5.2	-6.7
4.73611	-4.2	-0.2	-0.4	-0.9	-0.8	-1.7	-5.3	-6.9
4.74306	-4.2	-0.2	-0.4	-0.9	-0.8	-1.7	-5.3	-6.7
4.75	-4.3	-0.2	-0.4	-0.9	-0.8	-1.7	-5.4	-6.6
4.75694	-4.3	-0.2	-0.4	-0.9	-0.8	-1.7	-5.4	-6.9
4.76389	-4.4	-0.3	-0.4	-0.8	-0.8	-1.8	-5.5	-7
4.77083	-4.5	-0.3	-0.3	-0.8	-0.8	-1.8	-5.5	-7.1
4.77778	-4.5	-0.3	-0.3	-0.8	-0.8	-1.8	-5.6	-6.9
4.78472	-4.6	-0.3	-0.3	-0.8	-0.8	-1.8	-5.7	-7.4
4.79167	-4.7	-0.3	-0.3	-0.8	-0.8	-1.8	-5.8	-7.8
4.79861	-4.8	-0.3	-0.3	-0.8	-0.8	-1.9	-5.9	-7.6
4.80556	-4.9	-0.4	-0.3	-0.8	-0.8	-1.9	-6	-7.5
4.8125	-4.9	-0.4	-0.3	-0.8	-0.8	-1.9	-6.1	-7.6
4.81944	-5	-0.4	-0.3	-0.8	-0.8	-1.9	-6.1	-7.8
4.82639	-5.1	-0.4	-0.3	-0.8	-0.8	-1.9	-6.2	-7.9
4.83333	-5.1	0.4	-0.3	-0.8	-0.8	-1.9	-6.2	-8.1
4.84028	-5.2	0.4	-0.3	-0.8	-0.8	-2	-6.2	-8.1
4.84722	-5.2	0.4	-0.3	-0.8	-0.8	-2	-6.3	-8.6
4.85417	-5.2	0.5	-0.3	-0.8	-0.8	-2	-6.3	-8.8
4.86111	-5.2	0.5	-0.2	-0.7	-0.8	-2	-6.3	-8.6
4.86806	-5.2	0.5	-0.2	-0.7	-0.8	-2	-6.3	-8.7
4.875	-5.2	0.5	-0.2	-0.7	-0.8	-2.1	-6.3	-8.4
4.88194	-5.2	0.5	-0.2	-0.7	-0.8	-2.1	-6.2	-8.4
4.88889	-5.2	0.5	-0.2	-0.7	-0.8	-2.1	-6.2	-8.2
4.89583	-5.2	0.5	-0.2	-0.7	-0.8	-2.1	-6.1	-8.2
4.90278	-5	0.5	-0.2	-0.7	-0.8	-2.2	-6	-8.2
4.90972	-4.5	0.5	-0.2	-0.7	-0.8	-2.2	-5.7	-8.1
4.91667	-3.8	0.5	-0.2	-0.7	-0.8	-2.2	-5.5	-7.9
4.92361	-3.1	0.5	-0.2	-0.7	-0.8	-2.2	-5.3	-7.8
4.93056	-2.3	0.5	-0.2	-0.7	-0.8	-2.3	-5	-7.2
4.9375	-1.6	0.6	-0.2	-0.7	-0.8	-2.3	-4.7	1.8
4.94444	-1	0.6	-0.2	-0.7	-0.8	-2.3	-4.4	3.9
4.95139	-0.5	0.6	-0.2	-0.7	-0.8	-2.3	-4.1	6.5
4.95833	-0.2	0.6	-0.2	-0.7	-0.8	-2.3	-3.9	5.2
4.96528	0.2	0.6	-0.2	-0.6	-0.8	-2.3	-3.6	8.4
4.97222	0.4	0.6	-0.2	-0.6	-0.8	-2.4	-3.5	7.1
4.97917	0.6	0.6	-0.2	-0.6	-0.8	-2.4	-3.3	5.9
4.98611	0.6	0.6	-0.2	-0.6	-0.8	-2.4	-3.1	5.8
4.99306	0.3	0.6	-0.2	-0.6	-0.8	-2.4	-2.9	4
5	0.2	0.6	-0.2	-0.6	-0.8	-2.4	-2.9	4.7
5.00694	0.1	0.6	-0.2	-0.6	-0.8	-1.3	-1	3.6
5.01389	-0.1	0.6	-0.2	-0.6	-0.8	-1.3	-1.1	10.1
5.02083	-0.2	0.6	-0.2	-0.6	-0.8	-1.3	-1.2	4.9
5.02778	-0.3	0.6	-0.2	-0.6	-0.9	-1.3	-1.3	7.1
5.03472	-0.5	0.5	-0.2	-0.6	-0.9	-1.3	-1.3	7.1
5.04167	-0.6	0.5	-0.2	-0.6	-0.9	-1.3	-1.4	0.2
5.04861	-0.7	0.5	-0.2	-0.6	-0.9	-1.3	-1.5	-0.5
5.05556	-0.8	0.5	-0.2	-0.6	-0.9	-1.3	-1.6	-0.3
5.0625	-0.9	0.5	-0.2	-0.6	-0.9	-1.2	-1.7	-0.6
5.06944	-1	0.5	-0.2	-0.6	-1.5	-1.2	-1.8	-0.6
5.07639	-1.1	0.5	-0.2	-0.6	-1.5	-1.2	-1.9	-1.1
5.08333	-1.2	0.5	-0.2	-0.6	-1.5	-1.2	-2	-1.3
5.09028	-1.3	0.5	-0.2	-0.6	-1.5	-1.2	-2.1	-1.3
5.09722	-1.4	0.5	-0.2	-0.6	-1.5	-1.2	-2.2	-1.4
5.10417	-1.5	0.5	-0.2	-0.5	-1.5	-1.2	-2.3	-1.7
5.11111	-1.6	0.5	-0.2	-0.5	-1.5	-1.2	-2.4	-2.2
5.11806	-1.7	0.5	-0.2	-0.5	-1.5	-1.2	-2.5	-2.4
5.125	-1.8	0.5	-0.2	-0.5	-1.5	-1.2	-2.6	-2.4
5.13194	-1.9	0.4	-0.2	-0.5	-1.5	-1.2	-2.7	-2.7
5.13889	-2	0.4	-0.2	-0.5	-1.5	-1.2	-2.8	-3.1
5.14583	-2.1	0.4	-0.2	-0.5	-1.5	-1.2	-2.9	-3
5.15278	-2.2	0.4	-0.2	-0.5	-1.5	-1.2	-3	-3.3
5.15972	-2.3	0.4	-0.2	-0.5	-1.5	-1.2	-3.1	-3.5
5.16667	-2.3	0.4	-0.2	-0.5	-1.4	-1.2	-3.2	-3.6
5.17361	-2.4	0.4	-0.2	-0.5	-1.4	-1.2	-3.3	-3.8
5.18056	-2.4	0.4	-0.2	-0.5	-1.4	-1.2	-3.4	-3.9
5.1875	-2.5	0.3	-0.2	-0.5	-1.4	-1.2	-3.4	-4
5.19444	-2.5	0.3	-0.3	-0.5	-1.4	-1.2	-3.5	-4
5.20139	-2.6	0.3	-0.3	-0.5	-1.4	-1.2	-3.5	-4.3
5.20833	-2.6	0.3	-0.3	-0.5	-1.4	-1.2	-3.6	-4.4
5.21528	-2.7	0.3	-0.3	-0.5	-1.4	-1.2	-3.6	-4
5.22222	-2.8	0.3	-0.3	-0.5	-1.4	-1.2	-3.7	-3.9
5.22917	-2.9	0.2	-0.3	-0.5	-1.4	-1.2	-3.8	-3.9
5.23611	-3	0.2	-0.3	-0.5	-1.4	-1.2	-3.9	-4.2
5.24306	-3.1	0.2	-0.3	-0.5	-1.4	-1.2	-4	-4.2
5.25	-3.2	0.2	-0.3	-0.5	-1.4	-1.3	-4	-4.9
5.25694	-3.3	0.2	-0.3	-0.5	-1.3	-1.3	-4.2	-5
5.26389	-3.4	0.2	-0.3	-0.5	-1.3	-1.3	-4.2	-5.2
5.27083	-3.4	0.1	-0.3	-0.5	-1.3	-1.3	-4.3	-5.3
5.27778	-3.5	0.1	-0.3	-0.5	-1.3	-1.3	-4.3	-5.5
5.28472	-3.6	0.1	-0.3	-0.5	-1.3	-1.3	-4.4	-5.7
5.29167	-3.7	0.1	-0.3	-0.5	-1.3	-1.3	-4.5	-5.9
5.29861	-3.7	-0.1	-0.3	-0.5	-1.3	-1.3	-4.5	-6
5.30556	-3.8	-0.1	-0.3	-0.5	-1.3	-1.3	-4.6	-6
5.3125	-3.9	-0.1	-0.3	-0.5	-1.3	-1.4	-4.7	-6.2
5.31944	-3.9	-0.1	-0.3	-0.5	-1.3	-1.4	-4.8	-6.3
5.32639	-4	-0.1	-0.3	-0.5	-1.3	-1.4	-4.8	-6.4
5.33333	-4.1	-0.1	-0.3	-0.5	-1.3	-1.4	-4.9	-6.4
5.34028	-4.2	-0.1	-0.3	-0.5	-1.3	-1.4	-5	-6.6
5.34722	-4.2	-0.1	-0.3	-0.5	-1.3	-1.4	-5.1	-6.9
5.35417	-4.3	-0.1	-0.3	-0.5	-1.3	-1.5	-5.2	-6.7
5.36111	-4.3	-0.1	-0.3	-0.6	-1.3	-1.5	-5.2	-6.8
5.36806	-4.3	-0.1	-0.3	-0.6	-1.3	-1.5	-5.3	-7
5.375	-4.4	-0.1	-0.3	-0.6	-1.2	-1.5	-5.4	-7.1
5.38194	-4.4	-0.1	-0.3	-0.6	-1.2	-1.6	-5.4	-7.2
5.38889	-4.4	-0.1	-0.3	-0.6	-1.2	-1.6	-5.4	-7.3
5.39583	-4.4	-0.1	-0.3	-0.6	-1.2	-1.6	-5.4	-7.4
5.40278	-4.4	-0.1	-0.3	-0.6	-1.2	-1.6	-5.4	-7.3
5.40972	-4.4	-0.1	-0.3	-0.6	-1.2	-1.6	-5.3	-7.3
5.41667	-4.4	-0.1	-0.3	-0.6	-1.2	-1.7	-5.3	-7.1
5.42361	-4.2	0.1	-0.3	-0.6	-1.2	-1.7	-5.3	-7.2
5.43056	-3.7	0.1	-0.2	-0.6	-1.2	-1.7	-5.3	-7.1
5.4375	-3.1	0.1	-0.2	-0.6	-1.2	-1.7	-5.2	-7.1
5.44444	-2.5	0.2	-0.2	-0.6	-1.2	-1.7	-5	-7
5.45139	-1.9	0.2	-0.2	-0.6	-1.2	-1.8	-4.7	-6.8
5.45833	-1.3	0.2	-0.2	-0.6	-1.2	-1.8	-4.5	-6.7
5.46528	-0.7	0.3	-0.2	-0.6	-1.2	-1.8	-4.3	-6.4
5.47222	-0.1	0.3	-0.2	-0.6	-1.2	-1.8	-4.1	-1.4
5.47917	0.5	0.3	-0.2	-0.6	-1.2	-1.9	-3.9	1.5
5.48611	1	0.4	-0.1	-0.6	-1.2	-1.9	-3.6	2.2
5.49306	1.5	0.4	-0.1	-0.6	-1.2	-1.9	-3.4	2.8
5.5	2.1	0.4	-0.1	-0.6	-1.2	-1.9	-3.1	3.6
5.50694	2.6	0.5	-0.1	-0.6	-1.2	-1.9	-2.9	5.9
5.51389	3	0.5	-0.1	-0.6	-1.2	-1.9	-2.6	7.7
5.52083	3.5	0.5	-0.1	-0.5	-1.2	-2	-2.4	6.2
5.52778	3.8	0.6	-0.1	-0.5	-1.2	-2	-2.1	8.8
5.53472	4.2	0.6	0.1	-0.5	-1.1	-2	-1.9	9.5
5.54167	4.7	0.7	0.1	-0.5	-1.1	-2	-1.6	10.4
5.54861	5.1	0.7	0.1	-0.5	-1.1	-2	-1.3	11.3
5.55556	5.6	0.7	0.1	-0.5	-1.1	-2	-1.1	11.3
5.5625	6	0.8	0.1	-0.5	-1.1	-2	-0.8	9.8
5.56944	6.4	0.8	0.2	-0.5	-1.1	-2	-0.6	11.3
5.57639	6.8	0.8	0.2	-0.5	-1.1	-2	-0.4	10.6
5.58333	7.1	0.8	0.2	-0.5	-1.1	-2	-0.2	10.9
5.59028	7.6	0.9	0.2	-0.5	-1.1	-2	0.1	13.3
5.59722	8	0.9	0.2	-0.5	-1.1	-2	0.3	15.8
5.60417	8.3	0.9	0.2	-0.5	-1.1	-2	0.5	13.7
5.61111	8.6	1	0.2	-0.5	-1.1	-2	0.8	16.6
5.61806	8.8	1	0.2	-0.5	-1.1	-2	1	14.6
5.625	8.9	1	0.3	-0.5	-1.1	-2	1.2	15.3
5.63194	9	1	0.3	-0.4	-1.1	-2	1.4	15.2
5.63889	9	1	0.3	-0.4	-1.1	-1.9	1.5	19.1
5.64583	8.9	1.1	0.3	-0.4	-1.1	-1.9	1.7	18.9
5.65278	8.8	1.1	0.3	-0.4	-1.1	-1.9	1.9	17.9
5.65972	8.4	1.1	0.3	-0.4	-1.1	-1.9	2.1	16.4
5.66667	7.8	1.1	0.3	-0.4	-1.2	-1.9	2.2	16.9
5.67361	7.1	1.2	0.3	-0.4	-1.2	-1.8	2.3	16.1
5.68056	6.5	1.2	0.3	-0.4	-1.2	-1.8	2.2	16
5.6875	6	1.2	0.4	-0.4	-1.2	-1.8	2.2	14.9
5.69444	5.6	1.2	0.4	-0.4	-1.2	-1.7	2.1	12.5
5.70139	5.2	1.2	0.4	-0.4	-1.2	-1.7	2	13.5
5.70833	4.9	1.2	0.4	-0.3	-1.2	-1.7	1.9	11.3
5.71528	4.6	1.2	0.4	-0.3	-1.2	-1.6	1.7	9.6
5.72222	4.3	1.3	0.4	-0.3	-1.2	-1.6	1.6	9.3
5.72917	4.1	1.3	0.4	-0.3	-1.2	-1.5	1.5	9.1
5.73611	3.8	1.3	0.4	-0.3	-1.2	-1.5	1.4	8.9
5.74306	3.6	1.3	0.4	-0.3	-1.2	-1.5	1.3	8.6
5.75	3.4	1.3	0.4	-0.3	-1.2	-1.4	1.2	7.6
5.75694	3.2	1.3	0.4	-0.3	-1.2	-1.4	1.1	7.1
5.76389	3	1.3	0.4	-0.3	-1.2	-1.3	1	6.2
5.77083	2.8	1.3	0.4	-0.3	-1.2	-1.3	0.9	5.7
5.77778	2.6	1.3	0.5	-0.3	-1.2	-1.3	0.8	5.4
5.78472	2.4	1.3	0.5	-0.2	-1.2	-1.2	0.7	4.8
5.79167	2.2	1.4	0.5	-0.2	-1.2	-1.2	0.5	4.6
5.79861	2	1.4	0.5	-0.2	-1.2	-1.2	0.4	4.2
5.80556	1.8	1.4	0.5	-0.2	-1.2	-1.1	0.3	3.9
5.8125	1.7	1.4	0.5	-0.2	-1.2	-1.1	0.2	3.5
5.81944	1.5	1.4	0.5	-0.2	-1.2	-1.1	-0.1	2.8
5.82639	1.4	1.4	0.5	-0.2	-1.2	-1	-0.2	2.5
5.83333	1.3	1.4	0.5	-0.2	-1.2	-1	-0.3	2.2
5.84028	1.1	1.4	0.5	-0.2	-1.2	-1	-0.4	2
5.84722	1	1.4	0.5	-0.2	-1.2	-0.9	-0.5	1.4
5.85417	0.8	1.4	0.5	-0.2	-1.2	-0.9	-0.6	1.2
5.86111	0.7	1.4	0.5	-0.2	-1.2	-0.9	-0.7	1.3
5.86806	0.6	1.4	0.5	-0.1	-1.2	-0.9	-0.7	0.9
5.875	0.6	1.4	0.5	-0.1	-1.2	-0.8	-0.8	0.5
5.88194	0.5	1.4	0.5	-0.1	-1.2	-0.8	-0.9	0.5
5.88889	0.5	1.3	0.5	-0.1	-1.2	-0.8	-0.9	-0.2
5.89583	0.5	1.3	0.5	-0.1	-1.2	-0.8	-1	-0.4
5.90278	0.5	1.3	0.5	-0.1	-1.2	-0.8	-1	-0.2
5.90972	0.4	1.3	0.5	-0.1	-1.2	-0.7	-1.1	-0.6
5.91667	0.4	1.3	0.5	-0.1	-1.2	-0.7	-1.1	0.1
5.92361	0.4	1.3	0.5	-0.1	-1.2	-0.7	-1.2	0.9
5.93056	0.3	1.3	0.5	-0.1	-1.2	-0.7	-1.2	0.7
5.9375	0.3	1.3	0.5	-0.1	-1.2	-0.7	-1.3	0.4
5.94444	0.2	1.3	0.5	-0.1	-1.2	-0.7	-1.3	0.9
5.95139	0.2	1.3	0.5	-0.1	-1.1	-0.6	-1.4	0.8
5.95833	0.1	1.3	0.5	-0.1	-1.1	-0.6	-1.4	0.7
5.96528	-0.1	1.2	0.5	0.1	-1.1	-0.6	-1.5	0.6
5.97222	-0.1	1.2	0.5	0.1	-1.1	-0.6	-1.6	0.3
5.97917	-0.2	1.2	0.5	0.1	-1.1	-0.6	-1.6	0.4
5.98611	-0.2	1.2	0.5	0.1	-1.1	-0.6	-1.7	-0.2
5.99306	-0.3	1.2	0.5	0.1	-1.1	-0.6	-1.7	0.1
6	-0.4	1.2	0.5	0.1	-1.1	-0.6	-1.8	-0.2
6.00694	-0.4	1.2	0.5	0.1	-1.1	-0.6	-1.8	-0.4
6.01389	-0.5	1.2	0.5	0.1	-1.1	-0.6	-1.9	-0.2
6.02083	-0.6	1.2	0.5	0.1	-1.1	-0.6	-2	-0.6
6.02778	-0.7	1.1	0.5	0.1	-1.1	-0.6	-2	-0.8
6.03472	-0.7	1.1	0.5	0.1	-1.1	-0.6	-2.1	-0.7
6.04167	-0.8	1.1	0.5	0.1	-1.1	-0.6	-2.2	-0.8
6.04861	-0.9	1.1	0.5	0.1	-1	-0.6	-2.2	-1.2
6.05556	-1	1.1	0.5	0.1	-1	-0.6	-2.3	-1.3
6.0625	-1.1	1	0.5	0.1	-1	-0.6	-2.3	-1.2
6.06944	-1.2	1	0.5	0.1	-1	-0.6	-2.4	-1.4
6.07639	-1.3	1	0.5	0.1	-1	-0.6	-2.5	-1.7
6.08333	-1.3	1	0.5	0.1	-1	-0.6	-2.6	-1.7
6.09028	-1.4	1	0.4	0.1	-1	-0.6	-2.6	-1.7
6.09722	-1.5	1	0.4	0.1	-1	-0.6	-2.7	-1.9
6.10417	-1.6	1	0.4	0.1	-1	-0.6	-2.8	-2
6.11111	-1.7	0.9	0.4	0.1	-1	-0.6	-2.9	-2.1
6.11806	-1.8	0.9	0.4	0.1	-1	-0.6	-2.9	-2.5
6.125	-1.9	0.9	0.4	0.1	-0.9	-0.6	-3	-2.7
6.13194	-1.9	0.9	0.4	0.1	-0.9	-0.6	-3.1	-2.9
6.13889	-2	0.9	0.4	0.1	-0.9	-0.6	-3.2	-3.1
6.14583	-2.1	0.9	0.4	0.1	-0.9	-0.6	-3.2	-3.5
6.15278	-2.1	0.8	0.4	0.1	-0.9	-0.6	-3.3	-3.6
6.15972	-2.2	0.8	0.4	0.1	-0.9	-0.6	-3.4	-3.8
6.16667	-2.3	0.8	0.4	0.1	-0.9	-0.6	-3.4	-4.1
6.17361	-2.4	0.8	0.4	0.1	-0.9	-0.6	-3.5	-3.7
6.18056	-2.4	0.8	0.4	0.1	-0.9	-0.6	-3.5	-3.9
6.1875	-2.5	0.7	0.4	0.1	-0.9	-0.7	-3.6	-4.2
6.19444	-2.6	0.7	0.3	0.1	-0.9	-0.7	-3.7	-4
6.20139	-2.7	0.7	0.3	0.1	-0.9	-0.7	-3.8	-4.1
6.20833	-2.7	0.7	0.3	0.1	-0.8	-0.7	-3.8	-4.4
6.21528	-2.8	0.7	0.3	0.1	-0.8	-0.7	-3.9	-4.4
6.22222	-2.9	0.7	0.3	0.1	-0.8	-0.7	-4	-5
6.22917	-2.9	0.6	0.3	0.1	-0.8	-0.7	-4.1	-4.7
6.23611	-3	0.6	0.3	0.1	-0.8	-0.7	-4.2	-5
6.24306	-3.1	0.6	0.3	0.2	-0.8	-0.8	-4.2	-4.8
6.25	-3.2	0.6	0.3	0.2	-0.8	-0.8	-4.3	-5.2
6.25694	-3.2	0.5	0.3	0.2	-0.8	-0.8	-4.4	-5.3
6.26389	-3.3	0.5	0.3	0.2	-0.8	-0.8	-4.5	-5.4
6.27083	-3.4	0.5	0.3	0.2	-0.8	-0.8	-4.5	-5.5
6.27778	-3.4	0.5	0.3	0.2	-0.8	-0.8	-4.6	-5.6
6.28472	-3.5	0.5	0.3	0.2	-0.8	-0.8	-4.6	-5.6
6.29167	-3.6	0.5	0.3	0.2	-0.8	-0.9	-4.7	-5.7
6.29861	-3.7	0.5	0.3	0.2	-0.7	-0.9	-4.8	-6
6.30556	-3.7	0.4	0.3	0.2	-0.7	-0.9	-4.9	-5.9
6.3125	-3.8	0.4	0.3	0.2	-0.7	-0.9	-4.9	-5.9
6.31944	-3.9	0.4	0.3	0.2	-0.7	-0.9	-5	-6.3
6.32639	-3.9	0.4	0.3	0.3	-0.7	-0.9	-5	-6.3
6.33333	-4	0.4	0.3	0.3	-0.7	-1	-5.1	-6.4
6.34028	-4	0.4	0.3	0.3	-0.7	-1	-5.2	-6.4
6.34722	-4.1	0.4	0.3	0.3	-0.7	-1	-5.3	-6.5
6.35417	-4.1	0.4	0.3	0.3	-0.7	-1	-5.3	-6.8
6.36111	-4.2	0.4	0.3	0.3	-0.7	-1	-5.3	-6.6
6.36806	-4.2	0.5	0.3	0.3	-0.7	-1.1	-5.4	-7
6.375	-4.2	0.5	0.3	0.3	-0.7	-1.1	-5.4	-7
6.38194	-4.2	0.5	0.4	0.3	-0.7	-1.1	-5.4	-7
6.38889	-4.2	0.5	0.4	0.3	-0.7	-1.1	-5.5	-7.5
6.39583	-4.2	0.5	0.4	0.3	-0.7	-1.1	-5.5	-7.5
6.40278	-4.2	0.5	0.4	0.4	-0.7	-1.2	-5.5	-7.2
6.40972	-4	0.6	0.4	0.4	-0.7	-1.2	-5.5	-7
6.41667	-3.6	0.6	0.4	0.4	-0.7	-1.2	-5.4	-7.2
6.42361	-3	0.6	0.4	0.4	-0.7	-1.2	-5.4	-7.1
6.43056	-2.4	0.7	0.4	0.4	-0.7	-1.2	-5.3	-7.2
6.4375	-1.8	0.7	0.4	0.4	-0.6	-1.3	-5.1	-7.2
6.44444	-1.1	0.7	0.5	0.4	-0.6	-1.3	-4.9	-7
6.45139	-0.5	0.7	0.5	0.4	-0.6	-1.3	-4.6	-6.9
6.45833	0.2	0.8	0.5	0.4	-0.6	-1.3	-4.4	-6.8
6.46528	0.7	0.8	0.5	0.4	-0.6	-1.3	-4.2	-6.6
6.47222	1.3	0.8	0.5	0.4	-0.6	-1.3	-4	1.4
6.47917	1.8	0.9	0.5	0.5	-0.6	-1.4	-3.7	0.9
6.48611	2.4	0.9	0.5	0.5	-0.6	-1.4	-3.5	1.3
6.49306	2.9	0.9	0.5	0.5	-0.6	-1.4	-3.2	2.8
6.5	3.4	1	0.6	0.5	-0.6	-1.4	-3	5.4
6.50694	3.9	1	0.6	0.5	-0.6	-1.5	-2.7	5.3
6.51389	4.4	1	0.6	0.5	-0.6	-1.5	-2.5	7.4
6.52083	4.9	1.1	0.6	0.5	-0.6	-1.5	-2.2	9.2
6.52778	5.5	1.1	0.6	0.5	-0.6	-1.5	-2	8
6.53472	5.9	1.2	0.7	0.5	-0.6	-1.5	-1.7	10.6
6.54167	6.4	1.2	0.7	0.5	-0.6	-1.5	-1.4	10.7
6.54861	7	1.2	0.7	0.5	-0.6	-1.6	-1.2	11.1
6.55556	7.4	1.3	0.7	0.5	-0.6	-1.6	-0.9	15.1
6.5625	7.8	1.3	0.7	0.6	-0.6	-1.6	-0.7	12.9
6.56944	8.2	1.4	0.7	0.6	-0.6	-1.6	-0.5	13.6
6.57639	8.6	1.4	0.7	0.6	-0.6	-1.6	-0.2	13.5
6.58333	8.9	1.4	0.8	0.6	-0.6	-1.6	0.3	17.7
6.59028	9.2	1.4	0.8	0.6	-0.6	-1.6	0.5	17.4
6.59722	9.4	1.5	0.8	0.6	-0.6	-1.6	0.7	16.4
6.60417	9.5	1.5	0.8	0.6	-0.6	-1.6	0.9	18
6.61111	9.7	1.5	0.8	0.6	-0.6	-1.6	1.2	23.3
6.61806	9.8	1.5	0.8	0.6	-0.6	-1.5	1.4	16.3
6.625	9.9	1.6	0.8	0.6	-0.6	-1.5	1.6	21.8
6.63194	9.9	1.6	0.8	0.6	-0.6	-1.5	1.8	20.3
6.63889	9.9	1.6	0.9	0.7	-0.6	-1.5	1.9	18.8
6.64583	9.7	1.7	0.9	0.7	-0.6	-1.5	2.1	20.3
6.65278	9.1	1.7	0.9	0.7	-0.6	-1.4	2.2	19.1
6.65972	8.5	1.7	0.9	0.7	-0.6	-1.4	2.3	16.6
6.66667	7.8	1.7	0.9	0.7	-0.6	-1.4	2.2	19.9
6.67361	7.1	1.7	0.9	0.7	-0.6	-1.4	2	17.8
6.68056	6.6	1.8	0.9	0.7	-0.6	-1.3	2	14.8
6.6875	6.1	1.8	0.9	0.7	-0.6	-1.3	1.8	21.4
6.69444	5.8	1.8	0.9	0.7	-0.6	-1.3	1.8	16.1
6.70139	5.4	1.8	0.9	0.7	-0.6	-1.3	1.6	16.1
6.70833	5	1.8	1	0.7	-0.7	-1.2	1.6	13.6
6.71528	4.8	1.8	1	0.7	-0.7	-1.2	1.6	12.1
6.72222	4.5	1.8	1	0.7	-0.7	-1.1	1.5	12
6.72917	4.3	1.9	1	0.7	-0.7	-1.1	1.5	10
6.73611	4.1	1.9	1	0.7	-0.7	-1.1	1.4	9.5
6.74306	3.9	1.9	1	0.7	-0.7	-1	1.4	8.3
6.75	3.8	1.9	1	0.7	-0.7	-1	1.4	7.5
6.75694	3.5	1.9	1	0.8	-0.7	-0.9	1.3	7.7
6.76389	3.4	1.9	1	0.7	-0.7	-0.9	1.2	6.8
6.77083	3.2	1.9	1	0.8	-0.7	-0.9	1.1	6.1
6.77778	3	2	1	0.8	-0.7	-0.8	1	6.2
6.78472	2.8	2	1	0.8	-0.7	-0.8	0.9	6
6.79167	2.7	2	1.1	0.8	-0.7	-0.7	0.8	5.6
6.79861	2.5	2	1.1	0.8	-0.7	-0.7	0.7	5.3
6.80556	2.4	2	1.1	0.8	-0.7	-0.7	0.5	5
6.8125	2.3	2	1.1	0.8	-0.7	-0.6	0.5	4.7
6.81944	2.2	2	1.1	0.8	-0.7	-0.6	0.4	4.5
6.82639	2.1	2	1.1	0.8	-0.7	-0.6	0.3	3.8
6.83333	2.1	2	1.1	0.8	-0.7	-0.5	0.3	3.2
6.84028	2.2	2	1.1	0.8	-0.7	-0.5	0.2	2.9
6.84722	2.4	2	1.1	0.8	-0.7	-0.5	0.2	2.8
6.85417	2.6	2	1.1	0.8	-0.7	-0.5	0.2	2.6
6.86111	2.7	2	1.1	0.8	-0.7	-0.4	0.4	3.3
6.86806	2.8	2	1.1	0.8	-0.7	-0.4	0.5	2.8
6.875	2.9	2	1.1	0.8	-0.7	-0.4	0.5	3.1
6.88194	3	2	1.1	0.8	-0.7	-0.3	0.6	2.1
6.88889	3	2	1.1	0.8	-0.7	-0.3	0.7	3.8
6.89583	3	2	1.1	0.8	-0.7	-0.3	0.7	3.8
6.90278	2.8	2	1.1	0.8	-0.7	-0.3	0.8	5.5
6.90972	2.7	2	1.2	0.8	-0.7	-0.3	0.8	5.8
6.91667	2.5	2	1.2	0.8	-0.7	-0.2	0.7	5.7
6.92361	2.4	2	1.2	0.8	-0.7	-0.2	0.6	6.2
6.93056	2.3	2	1.2	0.8	-0.7	-0.2	0.5	5.8
6.9375	2.2	2	1.2	0.8	-0.7	-0.2	0.4	5.3
6.94444	2	2	1.2	0.8	-0.7	-0.2	0.3	6.1
6.95139	1.8	2	1.2	0.8	-0.7	-0.2	0.3	5.4
6.95833	1.7	2	1.2	0.8	-0.7	-0.1	0.2	4
6.96528	1.5	1.9	1.2	0.8	-0.7	-0.1	-0.1	3.2
6.97222	1.3	1.9	1.2	0.8	-0.6	-0.1	-0.2	3
6.97917	1.1	1.9	1.2	0.8	-0.6	-0.1	-0.3	3
6.98611	0.9	1.9	1.2	0.8	-0.6	-0.1	-0.5	3
6.99306	0.8	1.9	1.2	0.8	-0.6	-0.1	-0.6	3.2
7	0.6	1.9	1.2	0.8	-0.6	0.1	-0.7	3.3
7.00694	0.5	1.9	1.2	0.8	-0.6	0.1	-0.8	1.4
7.01389	0.3	1.9	1.2	0.8	-0.6	0.1	-0.9	0.9
7.02083	0.2	1.8	1.2	0.8	-0.6	0.1	-1	0.3
7.02778	0.1	1.8	1.2	0.8	-0.6	0.1	-1.1	-0.2
7.03472	-0.1	1.8	1.1	0.8	-0.6	0.1	-1.2	-0.3
7.04167	-0.2	1.8	1.1	0.8	-0.6	0.1	-1.3	-0.7
7.04861	-0.3	1.8	1.1	0.8	-0.6	0.1	-1.3	-0.3
7.05556	-0.4	1.8	1.1	0.8	-0.6	0.1	-1.4	-0.3
7.0625	-0.5	1.8	1.1	0.8	-0.6	0.1	-1.5	-1.2
7.06944	-0.6	1.8	1.1	0.8	-0.6	0.1	-1.6	-0.6
7.07639	-0.7	1.8	1.1	0.8	-0.5	0.1	-1.7	-0.7
7.08333	-0.8	1.7	1.1	0.8	-0.5	0.1	-1.8	-0.9
7.09028	-0.9	1.7	1.1	0.8	-0.5	0.1	-1.9	-1.9
7.09722	-0.9	1.7	1.1	0.8	-0.5	0.2	-1.9	-2
7.10417	-1	1.7	1.1	0.8	-0.5	0.1	-2	-1.4
7.11111	-1.1	1.7	1.1	0.8	-0.5	0.1	-2	-1.4
7.11806	-1.2	1.7	1.1	0.8	-0.5	0.1	-2.1	-2.1
7.125	-1.2	1.7	1.1	0.8	-0.5	0.1	-2.2	-2.5
7.13194	-1.3	1.6	1.1	0.8	-0.5	0.1	-2.3	-3.2
7.13889	-1.3	1.6	1.1	0.8	-0.5	0.1	-2.3	-2.7
7.14583	-1.4	1.6	1	0.8	-0.5	0.1	-2.4	-3.1
7.15278	-1.4	1.5	1	0.8	-0.4	0.1	-2.4	-3
7.15972	-1.5	1.5	1	0.8	-0.4	0.1	-2.5	-3.5
7.16667	-1.5	1.5	1	0.9	-0.4	0.1	-2.6	-3.1
7.17361	-1.6	1.5	1	0.9	-0.4	0.1	-2.6	-3.4
7.18056	-1.6	1.5	1	0.9	-0.4	0.1	-2.7	-3.6
7.1875	-1.6	1.5	1	0.9	-0.4	0.1	-2.7	-3.6
7.19444	-1.7	1.4	1	0.9	-0.4	0.1	-2.8	-4.1
7.20139	-1.8	1.4	1	0.9	-0.4	-0.1	-2.9	-4.1
7.20833	-1.8	1.4	1	0.9	-0.4	-0.1	-2.9	-3.4
7.21528	-1.9	1.4	1	0.9	-0.4	-0.1	-3	-3.5
7.22222	-2	1.4	1	0.9	-0.4	-0.1	-3.1	-3.5
7.22917	-2	1.4	1	0.9	-0.3	-0.1	-3.1	-3.3
7.23611	-2.1	1.4	1	0.9	-0.3	-0.1	-3.2	-3.3
7.24306	-2.2	1.3	1	0.9	-0.3	-0.1	-3.2	-3.9
7.25	-2.2	1.3	1	1	-0.3	-0.2	-3.3	-3.4
7.25694	-2.3	1.3	1	1	-0.3	-0.2	-3.3	-3.3
7.26389	-2.3	1.3	1	1	-0.3	-0.2	-3.4	-3.4
7.27083	-2.3	1.3	1	1	-0.3	-0.2	-3.5	-3.9
7.27778	-2.4	1.3	1	1	-0.3	-0.2	-3.5	-3.8
7.28472	-2.5	1.2	1	1	-0.3	-0.2	-3.6	-3.8
7.29167	-2.5	1.2	1	1	-0.3	-0.3	-3.7	-5.1
7.29861	-2.6	1.2	1	1	-0.3	-0.3	-3.7	-5.1
7.30556	-2.6	1.2	1	1	-0.2	-0.3	-3.8	-5.3
7.3125	-2.7	1.2	1	1	-0.2	-0.3	-3.9	-5.1
7.31944	-2.8	1.2	1	1	-0.2	-0.4	-3.9	-4.9
7.32639	-2.8	1.2	1	1.1	-0.2	-0.4	-4	-4.7
7.33333	-2.9	1.2	1	1.1	-0.2	-0.4	-4	-4.2
7.34028	-2.9	1.2	1	1.1	-0.2	-0.4	-4.1	-4.6
7.34722	-2.9	1.3	1	1.1	-0.2	-0.4	-4.1	-4.9
7.35417	-3	1.3	1.1	1.1	-0.2	-0.4	-4.2	-4.6
7.36111	-3	1.3	1.1	1.1	-0.2	-0.5	-4.2	-4.9
7.36806	-2.9	1.3	1.1	1.1	-0.2	-0.5	-4.2	-5.4
7.375	-2.9	1.3	1.1	1.2	-0.2	-0.5	-4.3	-5.4
7.38194	-2.7	1.3	1.1	1.2	-0.2	-0.5	-4.3	-6
7.38889	-2.3	1.4	1.1	1.2	-0.2	-0.5	-4.2	-5.4
7.39583	-1.7	1.4	1.1	1.2	-0.1	-0.6	-4.2	-5.6
7.40278	-1.2	1.4	1.2	1.2	-0.1	-0.6	-4.1	-5.3
7.40972	-0.5	1.4	1.2	1.2	-0.1	-0.6	-3.8	-5.5
7.41667	0.1	1.5	1.2	1.2	-0.1	-0.6	-3.6	-5.4
7.42361	0.7	1.5	1.2	1.2	-0.1	-0.6	-3.4	-5.4
7.43056	1.4	1.5	1.2	1.2	-0.1	-0.6	-3.1	-5.5
7.4375	2	1.5	1.2	1.2	-0.1	-0.6	-2.9	-4.6
7.44444	2.5	1.6	1.2	1.3	-0.1	-0.6	-2.7	-4.5
7.45139	3	1.6	1.2	1.3	-0.1	-0.6	-2.4	-4.5
7.45833	3.5	1.7	1.3	1.3	-0.1	-0.6	-2.1	0.7
7.46528	4	1.7	1.3	1.3	-0.1	-0.6	-1.9	4.1
7.47222	4.5	1.7	1.3	1.3	-0.1	-0.6	-1.6	3.1
7.47917	4.9	1.7	1.3	1.3	-0.1	-0.6	-1.3	4.6
7.48611	5.3	1.8	1.3	1.3	-0.1	-0.6	-1.1	6.3
7.49306	5.7	1.8	1.4	1.3	-0.1	-0.6	-0.8	7.6
7.5	6.1	1.8	1.4	1.3	-0.1	-0.6	-0.6	9.2
7.50694	6.6	1.9	1.4	1.4	-0.1	-0.5	-0.3	10.1
7.51389	7	1.9	1.4	1.4	-0.1	-0.5	-0.1	10.7
7.52083	7.5	2	1.4	1.4	-0.1	-0.5	0.2	10.6
7.52778	7.9	2	1.4	1.4	-0.1	-0.5	0.4	9.9
7.53472	8.4	2	1.4	1.4	-0.1	-0.4	0.7	12.4
7.54167	8.8	2.1	1.5	1.4	-0.1	-0.4	0.9	12.1
7.54861	9.2	2.1	1.5	1.4	-0.1	-0.4	1.1	12.5
7.55556	9.3	2.2	1.5	1.4	-0.1	-0.4	1.3	13.4
7.5625	9.6	2.2	1.5	1.4	-0.1	-0.3	1.5	12.8
7.56944	9.6	2.2	1.5	1.4	-0.1	-0.3	1.7	14.2
7.57639	9.7	2.2	1.5	1.4	-0.1	-0.3	2	14.7
7.58333	9.8	2.3	1.5	1.4	-0.1	-0.2	2.2	17.1
7.59028	9.8	2.3	1.6	1.4	0.1	-0.2	2.4	15.9
7.59722	9.8	2.3	1.6	1.4	0.1	-0.2	2.5	17.3
7.60417	9.9	2.4	1.6	1.4	0.1	-0.1	2.7	16.7
7.61111	9.9	2.4	1.6	1.4	0.1	-0.1	2.9	20.1
7.61806	9.8	2.4	1.6	1.5	0.1	0.1	3	17.8
7.625	9.4	2.4	1.6	1.5	0.1	0.1	3.2	16.7
7.63194	8.8	2.5	1.7	1.5	0.1	0.2	3.4	16.2
7.63889	8.3	2.5	1.7	1.5	0.1	0.2	3.5	20.8
7.64583	7.8	2.5	1.7	1.5	0.2	0.3	3.5	14
7.65278	7.3	2.6	1.7	1.5	0.2	0.3	3.4	22.5
7.65972	6.9	2.6	1.7	1.5	0.2	0.3	3.3	16.2
7.66667	6.5	2.6	1.7	1.5	0.2	0.4	3.2	14.2
7.67361	6.2	2.6	1.7	1.5	0.2	0.4	3.2	14.2
7.68056	6	2.6	1.7	1.5	0.2	0.4	3.1	16.2
7.6875	5.8	2.6	1.8	1.5	0.2	0.4	3.1	14.3
7.69444	5.7	2.7	1.8	1.5	0.2	0.5	3.1	15.1
7.70139	5.6	2.7	1.8	1.5	0.2	0.5	3.1	12.4
7.70833	5.5	2.7	1.8	1.5	0.3	0.5	3.2	12.3
7.71528	5.4	2.7	1.8	1.5	0.3	0.6	3.2	10.7
7.72222	5.4	2.7	1.8	1.5	0.3	0.6	3.2	10.2
7.72917	5.3	2.7	1.8	1.5	0.3	0.6	3.2	9.2
7.73611	5.2	2.8	1.8	1.5	0.3	0.7	3.2	8.4
7.74306	5	2.8	1.8	1.5	0.3	0.7	3.2	8.6
7.75	4.9	2.8	1.8	1.5	0.3	0.7	3.2	8.1
7.75694	4.8	2.8	1.8	1.5	0.3	0.7	3.1	8
7.76389	4.7	2.8	1.8	1.5	0.3	0.8	3	9.4
7.77083	4.5	2.8	1.9	1.5	0.4	0.8	3	9.4
7.77778	4.4	2.8	1.9	1.5	0.4	0.8	2.9	9
7.78472	4.2	2.8	1.9	1.5	0.4	0.8	2.8	8.8
7.79167	4.1	2.8	1.9	1.5	0.4	0.8	2.8	8.7
7.79861	3.9	2.8	1.9	1.5	0.4	0.9	2.7	8.3
7.80556	3.8	2.8	1.9	1.5	0.4	0.9	2.6	8.3
7.8125	3.7	2.8	1.9	1.5	0.4	0.9	2.5	8
7.81944	3.5	2.8	1.9	1.5	0.4	0.9	2.4	7.1
7.82639	3.4	2.8	1.9	1.5	0.4	0.9	2.4	7.2
7.83333	3.2	2.8	1.9	1.5	0.5	0.9	2.3	6.8
7.84028	3.1	2.8	1.9	1.5	0.5	0.9	2.2	6
7.84722	3	2.8	1.9	1.5	0.5	1	2.1	5.7
7.85417	2.9	2.8	1.9	1.5	0.5	1	2	5.6
7.86111	2.8	2.8	1.9	1.5	0.5	1	1.9	4.9
7.86806	2.7	2.8	1.9	1.5	0.5	1	1.8	4.8
7.875	2.6	2.8	1.9	1.5	0.5	1	1.7	4.6
7.88194	2.5	2.8	1.9	1.5	0.5	1	1.6	4.3
7.88889	2.4	2.8	2	1.5	0.5	1	1.5	3.9
7.89583	2.4	2.8	2	1.5	0.5	1	1.4	3.7
7.90278	2.2	2.8	2	1.5	0.6	1	1.3	3.5
7.90972	2.1	2.8	2	1.5	0.6	1	1.2	3.2
7.91667	2	2.8	2	1.5	0.6	1	1.1	3.2
7.92361	1.9	2.8	2	1.5	0.6	1	1	2.9
7.93056	1.8	2.8	2	1.5	0.6	1	0.9	2.8
7.9375	1.7	2.8	2	1.5	0.6	1	0.8	2.6
7.94444	1.6	2.8	2	1.5	0.6	1	0.6	2.5
7.95139	1.5	2.7	2	1.5	0.6	1	0.5	2.3
7.95833	1.4	2.7	2	1.5	0.7	1	0.4	2.3
7.96528	1.2	2.7	2	1.5	0.7	1	0.3	2
7.97222	1.1	2.7	2	1.5	0.7	1	0.2	1.9
7.97917	1	2.7	2	1.5	0.7	1	0.1	1.9
7.98611	0.9	2.7	2	1.5	0.7	1	-0.1	1.7
7.99306	0.8	2.7	2	1.5	0.7	1	-0.2	1.1
8	0.7	2.7	2	1.5	0.7	1	-0.3	1.1
8.00694	0.6	2.6	2	1.5	0.7	1	-0.4	0.7
8.01389	0.5	2.6	2	1.5	0.7	0.9	-0.5	0.2
8.02083	0.4	2.6	1.9	1.5	0.7	0.9	-0.6	0.7
8.02778	0.3	2.6	1.9	1.5	0.7	0.9	-0.7	0.5
8.03472	0.2	2.6	1.9	1.5	0.7	0.9	-0.8	0.2
8.04167	0.2	2.6	1.9	1.5	0.7	0.9	-0.8	-0.2
8.04861	0.2	2.6	1.9	1.5	0.7	0.9	-0.9	-0.5
8.05556	0.1	2.6	1.9	1.5	0.7	0.9	-0.9	-0.5
8.0625	-0.1	2.5	1.9	1.5	0.8	0.9	-0.9	-0.9
8.06944	-0.1	2.5	1.9	1.5	0.8	0.9	-1	-0.9
8.07639	-0.1	2.5	1.9	1.5	0.8	0.8	-1.1	-1.3
8.08333	-0.1	2.5	1.9	1.5	0.8	0.8	-1.2	-1.3
8.09028	-0.2	2.5	1.9	1.5	0.8	0.8	-1.2	-1.6
8.09722	-0.3	2.4	1.9	1.5	0.8	0.8	-1.2	-2.6
8.10417	-0.4	2.4	1.9	1.5	0.8	0.8	-1.2	-1.9
8.11111	-0.5	2.4	1.9	1.5	0.8	0.8	-1.3	-1.9
8.11806	-0.6	2.4	1.9	1.5	0.8	0.8	-1.4	-1.8
8.125	-0.7	2.4	1.9	1.5	0.8	0.7	-1.4	-2
8.13194	-0.8	2.4	1.8	1.5	0.8	0.7	-1.6	-1.9
8.13889	-0.9	2.3	1.8	1.5	0.8	0.7	-1.6	-2.3
8.14583	-1	2.3	1.8	1.5	0.8	0.7	-1.7	-2.4
8.15278	-1.1	2.3	1.8	1.5	0.8	0.7	-1.8	-2
8.15972	-1.2	2.3	1.8	1.5	0.8	0.7	-1.9	-2.3
8.16667	-1.3	2.2	1.8	1.5	0.8	0.6	-2	-2.2
8.17361	-1.3	2.2	1.8	1.5	0.8	0.6	-2.1	-2.3
8.18056	-1.3	2.2	1.8	1.5	0.8	0.6	-2.2	-2.6
8.1875	-1.4	2.2	1.8	1.5	0.8	0.6	-2.3	-2.4
8.19444	-1.5	2.2	1.8	1.5	0.8	0.5	-2.3	-3.1
8.20139	-1.6	2.2	1.8	1.5	0.8	0.5	-2.4	-3.2
8.20833	-1.7	2.1	1.8	1.5	0.8	0.5	-2.4	-3.1
8.21528	-1.7	2.1	1.8	1.5	0.8	0.5	-2.5	-3.1
8.22222	-1.8	2.1	1.8	1.5	0.8	0.5	-2.6	-3.7
8.22917	-1.9	2.1	1.8	1.5	0.8	0.4	-2.7	-4.1
8.23611	-1.9	2	1.8	1.5	0.8	0.4	-2.8	-3.9
8.24306	-2	2	1.8	1.5	0.8	0.4	-2.9	-4.1
8.25	-2.1	2	1.8	1.5	0.8	0.4	-3	-4.3
8.25694	-2.2	2	1.8	1.5	0.8	0.3	-3.1	-4.3
8.26389	-2.3	2	1.8	1.5	0.8	0.3	-3.2	-4.4
8.27083	-2.3	2	1.8	1.5	0.8	0.3	-3.3	-4.1
8.27778	-2.4	2	1.8	1.5	0.8	0.3	-3.3	-4.5
8.28472	-2.5	2	1.8	1.5	0.8	0.3	-3.4	-4.6
8.29167	-2.6	1.9	1.8	1.6	0.8	0.2	-3.5	-4.7
8.29861	-2.6	1.9	1.8	1.6	0.8	0.2	-3.5	-4.9
8.30556	-2.7	1.9	1.8	1.6	0.8	0.2	-3.6	-5.1
8.3125	-2.7	1.9	1.8	1.6	0.8	0.2	-3.7	-4.8
8.31944	-2.8	1.9	1.8	1.6	0.8	0.1	-3.7	-4.9
8.32639	-2.8	1.9	1.8	1.6	0.8	0.1	-3.8	-5.2
8.33333	-2.8	1.9	1.8	1.6	0.8	0.1	-3.8	-5.5
8.34028	-2.9	1.9	1.8	1.6	0.8	0.1	-3.9	-6
8.34722	-2.9	1.9	1.8	1.6	0.8	-0.1	-3.9	-6.1
8.35417	-2.9	1.9	1.8	1.6	0.8	-0.1	-4	-5.6
8.36111	-2.9	1.9	1.8	1.6	0.8	-0.1	-4	-5.6
8.36806	-2.7	1.9	1.8	1.6	0.8	-0.1	-4	-6
8.375	-2.3	2	1.8	1.6	0.8	-0.1	-4	-5.9
8.38194	-1.7	2	1.8	1.6	0.8	-0.1	-4	-6.4
8.38889	-1	2	1.8	1.6	0.8	-0.1	-4	-6.4
8.39583	-0.3	2	1.8	1.6	0.8	-0.1	-3.9	-6.2
8.40278	0.5	2	1.8	1.6	0.8	-0.1	-3.7	-5.9
8.40972	1.1	2	1.8	1.6	0.8	-0.1	-3.4	-5.8
8.41667	1.7	2	1.8	1.6	0.8	-0.1	-3.2	-5.7
8.42361	2.3	2.1	1.9	1.6	0.8	-0.1	-3	-5.8
8.43056	2.7	2.1	1.9	1.6	0.8	-0.1	-2.7	-6
8.4375	3.2	2.1	1.9	1.6	0.8	-0.1	-2.4	-5.9
8.44444	3.6	2.2	1.9	1.6	0.8	-0.1	-2.1	-5.7
8.45139	4	2.2	1.9	1.6	0.8	-0.1	-1.8	-5.5
8.45833	4.3	2.2	1.9	1.7	0.8	-0.1	-1.5	1.4
8.46528	4.6	2.2	1.9	1.7	0.8	-0.1	-1.3	4.5
8.47222	4.9	2.2	1.9	1.7	0.8	-0.1	-1.1	4.5
8.47917	5.2	2.3	1.9	1.7	0.8	0.1	-0.9	4.3
8.48611	5.5	2.3	2	1.7	0.8	0.1	-0.6	7.6
8.49306	5.7	2.3	2	1.7	0.8	0.1	-0.5	7
8.5	6	2.4	2	1.7	0.8	0.2	-0.3	7
8.50694	6.2	2.4	2	1.7	0.8	0.2	-0.1	8.4
8.51389	6.5	2.4	2	1.7	0.8	0.2	0.1	8.9
8.52083	6.7	2.4	2	1.7	0.8	0.3	0.2	7
8.52778	7	2.4	2	1.7	0.8	0.3	0.4	8.9
8.53472	7.2	2.5	2	1.7	0.8	0.3	0.5	9.3
8.54167	7.4	2.5	2	1.7	0.8	0.3	0.7	11.6
8.54861	7.5	2.5	2	1.7	0.8	0.3	0.8	9.4
8.55556	7.7	2.5	2	1.7	0.8	0.4	1	9.8
8.5625	7.9	2.6	2	1.7	0.8	0.4	1.1	10.5
8.56944	8.1	2.6	2	1.7	0.8	0.4	1.2	12.6
8.57639	8.2	2.6	2	1.7	0.8	0.4	1.3	11.8
8.58333	8.2	2.6	2.1	1.7	0.8	0.5	1.5	13
8.59028	8.1	2.6	2.1	1.6	0.8	0.5	1.6	12
8.59722	8	2.6	2.1	1.6	0.8	0.5	1.7	13.3
8.60417	7.8	2.6	2.1	1.6	0.8	0.5	1.8	13.2
8.61111	7.2	2.7	2.1	1.6	0.8	0.5	1.9	13.3
8.61806	6.4	2.7	2.1	1.6	0.8	0.5	1.9	10.3
8.625	5.8	2.7	2.1	1.6	0.8	0.5	2	14.8
8.63194	5.1	2.7	2.1	1.6	0.8	0.6	2	12.8
8.63889	4.6	2.7	2.1	1.6	0.8	0.6	1.8	12.7
8.64583	4.2	2.7	2.1	1.6	0.8	0.6	1.6	11.8
8.65278	3.8	2.7	2.1	1.6	0.8	0.6	1.4	14
8.65972	3.5	2.7	2.1	1.6	0.8	0.6	1.3	14.6
8.66667	3.2	2.7	2.1	1.6	0.8	0.6	1.1	14.3
8.67361	3	2.7	2.1	1.6	0.8	0.6	1	13.7
8.68056	2.9	2.8	2.1	1.6	0.8	0.6	0.9	12.9
8.6875	2.7	2.8	2.1	1.6	0.8	0.6	0.8	12
8.69444	2.6	2.8	2.1	1.6	0.8	0.6	0.7	10.7
8.70139	2.4	2.8	2.1	1.6	0.8	0.6	0.6	7.1
8.70833	2.3	2.8	2.1	1.6	0.8	0.7	0.5	4.6
8.71528	2.1	2.8	2.1	1.6	0.8	0.7	0.4	4.1
8.72222	2	2.8	2.1	1.6	0.8	0.7	0.3	3.8
8.72917	1.8	2.8	2.1	1.6	0.8	0.7	0.3	3.6
8.73611	1.7	2.7	2.1	1.6	0.8	0.7	0.2	3.4
8.74306	1.6	2.7	2.1	1.6	0.8	0.7	0.1	3.1
8.75	1.5	2.7	2.1	1.5	0.9	0.7	-0.1	2.8
8.75694	1.4	2.7	2.1	1.5	0.9	0.6	-0.3	2.8
8.76389	1.4	2.7	2.1	1.5	0.9	0.6	-0.4	2.5
8.77083	1.3	2.7	2.1	1.5	0.9	0.6	-0.4	2.2
8.77778	1.2	2.7	2.1	1.5	0.9	0.6	-0.5	2.1
8.78472	1	2.7	2.1	1.5	0.9	0.6	-0.6	2
8.79167	0.9	2.7	2.1	1.5	0.9	0.6	-0.6	1.8
8.79861	0.8	2.7	2.1	1.5	0.9	0.6	-0.7	1.7
8.80556	0.7	2.7	2.1	1.5	0.9	0.6	-0.8	1.7
8.8125	0.5	2.6	2.1	1.5	0.9	0.6	-1	0.7
8.81944	0.4	2.6	2.1	1.5	0.9	0.6	-1.1	0.8
8.82639	0.3	2.6	2.1	1.5	0.9	0.6	-1.2	0.4
8.83333	0.2	2.6	2.1	1.4	0.9	0.6	-1.3	0.4
8.84028	-0.1	2.6	2.1	1.4	0.9	0.5	-1.4	0.5
8.84722	-0.2	2.6	2.1	1.4	0.9	0.5	-1.5	0.8
8.85417	-0.4	2.6	2.1	1.4	0.9	0.5	-1.6	0.6
8.86111	-0.5	2.6	2	1.4	0.9	0.5	-1.7	0.2
8.86806	-0.6	2.5	2	1.4	0.9	0.5	-1.9	-0.3
8.875	-0.7	2.5	2	1.4	0.9	0.5	-1.9	0.1
8.88194	-0.8	2.5	2	1.4	0.9	0.5	-2	-0.6
8.88889	-1	2.5	2	1.4	0.9	0.5	-2.1	-0.8
8.89583	-1.1	2.5	2	1.4	0.9	0.4	-2.2	-0.9
8.90278	-1.2	2.4	2	1.3	0.9	0.4	-2.3	-1
8.90972	-1.3	2.4	2	1.3	0.9	0.4	-2.4	-1.8
8.91667	-1.3	2.4	2	1.3	0.9	0.4	-2.5	-2
8.92361	-1.4	2.4	2	1.3	0.9	0.4	-2.6	-1.8
8.93056	-1.5	2.4	2	1.3	0.9	0.4	-2.7	-2.8
8.9375	-1.6	2.3	2	1.3	0.9	0.3	-2.8	-2.3
8.94444	-1.7	2.3	1.9	1.2	0.9	0.3	-2.9	-3.3
8.95139	-1.8	2.3	1.9	1.2	0.9	0.3	-3	-2.9
8.95833	-1.9	2.3	1.9	1.2	0.9	0.3	-3.1	-2.7
8.96528	-2	2.2	1.9	1.2	0.9	0.3	-3.2	-3.9
8.97222	-2	2.2	1.9	1.2	0.9	0.2	-3.3	-4.2
8.97917	-2.2	2.2	1.9	1.2	0.9	0.2	-3.4	-4.5
8.98611	-2.3	2.2	1.9	1.2	0.8	0.2	-3.5	-4.7
8.99306	-2.3	2.2	1.9	1.2	0.8	0.2	-3.5	-5
9	-2.4	2.1	1.8	1.2	0.8	0.2	-3.6	-5.2
9.00694	-2.5	2.1	1.8	1.2	0.8	0.1	-3.7	-3.6
9.01389	-2.6	2.1	1.8	1.1	0.8	0.1	-3.8	-4.3
9.02083	-2.7	2	1.8	1.1	0.8	0.1	-3.9	-4.2
9.02778	-2.8	2	1.8	1.1	0.8	-0.1	-4	-4.2
9.03472	-2.9	2	1.8	1.1	0.8	-0.1	-4	-4.7
9.04167	-3	2	1.8	1.1	0.8	-0.1	-4.1	-5.1
9.04861	-3.1	1.9	1.8	1.1	0.8	-0.2	-4.2	-4.9
9.05556	-3.1	1.9	1.7	1.1	0.8	-0.2	-4.3	-5.1
9.0625	-3.2	1.9	1.7	1.1	0.8	-0.2	-4.4	-5.5
9.06944	-3.3	1.8	1.7	1	0.8	-0.2	-4.5	-5.3
9.07639	-3.4	1.8	1.7	1	0.8	-0.3	-4.6	-6.1
9.08333	-3.5	1.8	1.7	1	0.8	-0.3	-4.7	-6
9.09028	-3.6	1.7	1.7	1	0.8	-0.3	-4.8	-5.8
9.09722	-3.7	1.7	1.6	1	0.8	-0.4	-4.9	-6.3
9.10417	-3.7	1.7	1.6	1	0.8	-0.4	-5	-7.3
9.11111	-3.8	1.7	1.6	1	0.8	-0.4	-5.1	-6.2
9.11806	-3.9	1.6	1.6	1	0.7	-0.5	-5.1	-6.6
9.125	-4	1.6	1.6	1	0.7	-0.5	-5.2	-6.6
9.13194	-4.1	1.5	1.5	1	0.7	-0.5	-5.3	-6.8
9.13889	-4.2	1.5	1.5	1	0.7	-0.6	-5.4	-6.9
9.14583	-4.3	1.5	1.5	1	0.7	-0.6	-5.5	-6.7
9.15278	-4.3	1.5	1.5	1	0.7	-0.6	-5.5	-7.4
9.15972	-4.4	1.4	1.5	1	0.7	-0.7	-5.6	-7.4
9.16667	-4.5	1.4	1.5	1	0.7	-0.7	-5.7	-7.2
9.17361	-4.6	1.4	1.4	1	0.7	-0.7	-5.8	-7.7
9.18056	-4.6	1.3	1.4	1	0.7	-0.8	-5.9	-7.6
9.1875	-4.7	1.3	1.4	1	0.7	-0.8	-6	-8
9.19444	-4.8	1.3	1.4	1	0.7	-0.8	-6.1	-7.8
9.20139	-4.8	1.2	1.4	1	0.7	-0.9	-6.1	-8.1
9.20833	-4.9	1.2	1.4	1	0.6	-0.9	-6.2	-8
9.21528	-5	1.2	1.4	1	0.6	-0.9	-6.3	-8.7
9.22222	-5.1	1.2	1.3	1	0.6	-1	-6.3	-8.2
9.22917	-5.2	1.1	1.3	1	0.6	-1	-6.4	-8.6
9.23611	-5.2	1.1	1.3	1	0.6	-1	-6.5	-8.7
9.24306	-5.3	1	1.3	1	0.6	-1.1	-6.6	-8.8
9.25	-5.4	1	1.3	1	0.6	-1.1	-6.7	-9
9.25694	-5.4	1	1.3	1	0.5	-1.1	-6.8	-9
9.26389	-5.5	1	1.2	1	0.5	-1.2	-6.9	-9.2
9.27083	-5.6	1	1.2	1	0.5	-1.2	-6.9	-8.8
9.27778	-5.7	0.9	1.2	1	0.5	-1.2	-7	-9.3
9.28472	-5.7	0.9	1.2	1	0.5	-1.3	-7.1	-9.2
9.29167	-5.8	0.9	1.2	1	0.5	-1.3	-7.2	-9.4
9.29861	-5.8	0.9	1.2	1	0.5	-1.3	-7.3	-9.4
9.30556	-5.9	0.9	1.2	1	0.5	-1.3	-7.3	-9.8
9.3125	-5.9	0.9	1.2	1	0.4	-1.3	-7.4	-9.7
9.31944	-5.9	0.9	1.2	1	0.4	-1.3	-7.4	-9.7
9.32639	-6	0.9	1.2	1	0.4	-1.3	-7.5	-10.1
9.33333	-6	0.8	1.2	1	0.4	-1.4	-7.5	-9.7
9.34028	-6	0.8	1.2	1	0.4	-1.4	-7.5	-10
9.34722	-6	0.9	1.2	1	0.4	-1.4	-7.5	-10.1
9.35417	-5.9	0.9	1.2	1	0.4	-1.4	-7.5	-10.2
9.36111	-5.8	0.9	1.2	1	0.3	-1.4	-7.5	-10.4
9.36806	-5.3	0.9	1.2	1	0.3	-1.4	-7.5	-10.5
9.375	-4.6	0.9	1.2	1	0.3	-1.4	-7.5	-10.6
9.38194	-3.8	0.9	1.2	1	0.3	-1.4	-7.4	-10.7
9.38889	-2.9	0.9	1.2	1	0.3	-1.4	-7.3	-10.5
9.39583	-2.1	0.9	1.2	1	0.3	-1.3	-7.1	-10.6
9.40278	-1.3	0.9	1.2	1	0.3	-1.3	-6.8	-10.5
9.40972	-0.5	1	1.2	1	0.3	-1.3	-6.5	-10.5
9.41667	0.3	1	1.2	1	0.2	-1.3	-6.3	-10.4
9.42361	1	1	1.2	1	0.2	-1.3	-6	-10.5
9.43056	1.8	1	1.2	1	0.2	-1.3	-5.8	-10.6
9.4375	2.5	1.1	1.2	1	0.2	-1.2	-5.5	-10.5
9.44444	3.1	1.1	1.2	1.1	0.2	-1.2	-5.3	-10.1
9.45139	3.7	1.2	1.2	1.1	0.2	-1.2	-5	-10.2
9.45833	4.3	1.2	1.3	1.1	0.2	-1.2	-4.7	0.5
9.46528	4.9	1.2	1.3	1.1	0.2	-1.1	-4.5	0.8
9.47222	5.5	1.2	1.3	1.1	0.2	-1.1	-4.2	3.7
9.47917	6	1.3	1.3	1.1	0.2	-1	-3.9	7.1
9.48611	6.6	1.3	1.3	1.1	0.1	-1	-3.7	8.4
9.49306	7	1.4	1.3	1.1	0.1	-1	-3.4	9.5
9.5	7.5	1.4	1.3	1.1	0.1	-0.9	-3.1	8.2
9.50694	7.7	1.4	1.3	1.1	0.1	-0.9	-2.9	12.1
9.51389	7.9	1.5	1.3	1.1	0.1	-0.9	-2.6	15.5
9.52083	8.1	1.5	1.3	1.1	0.1	-0.8	-2.3	12.3
9.52778	8.3	1.5	1.4	1.1	0.1	-0.8	-2	16.6
9.53472	8.5	1.6	1.4	1.1	0.1	-0.7	-1.8	11.3
9.54167	8.8	1.6	1.4	1.1	0.1	-0.7	-1.5	18.7
9.54861	9.1	1.6	1.4	1.1	0.1	-0.7	-1.3	17.4
9.55556	9.5	1.7	1.4	1.1	0.1	-0.6	-1	17.2
9.5625	9.9	1.7	1.4	1.1	0.1	-0.6	-0.8	19.8
9.56944	10.1	1.7	1.4	1.1	0.1	-0.6	-0.5	20.3
9.57639	10.3	1.8	1.4	1.1	0.1	-0.5	-0.3	21.5
9.58333	10.4	1.8	1.4	1.1	0.1	-0.5	-0.1	22
9.59028	10.6	1.8	1.4	1.1	0.1	-0.5	0.1	19.8
9.59722	10.4	1.8	1.4	1.1	0.1	-0.4	0.3	17
9.60417	9.9	1.9	1.4	1.1	0.1	-0.4	0.4	15.9
9.61111	9	1.9	1.4	1.1	0.1	-0.4	0.6	14.8
9.61806	8.2	1.9	1.5	1.1	0.1	-0.3	0.8	14.7
9.625	7.4	1.9	1.5	1.1	0.1	-0.3	0.9	17
9.63194	6.7	2	1.5	1.1	0.1	-0.3	0.8	17.7
9.63889	6.1	2	1.5	1.1	0.1	-0.3	0.7	17.8
9.64583	5.7	2	1.5	1.1	0.1	-0.2	0.6	22.9
9.65278	5.3	2	1.5	1.1	0.1	-0.2	0.6	22.1
9.65972	5	2	1.5	1.1	0.1	-0.2	0.7	18.1
9.66667	4.7	2	1.5	1.1	0.1	-0.2	0.7	18.6
9.67361	4.5	2	1.5	1.1	0.1	-0.2	0.7	22.3
9.68056	4.3	2.1	1.5	1.1	0.1	-0.1	0.8	21.9
9.6875	4.2	2.1	1.5	1.1	0.1	-0.1	0.8	23.1
9.69444	4.1	2.1	1.5	1.1	0.1	-0.1	0.8	18.9
9.70139	3.9	2.1	1.5	1.1	0.1	-0.1	0.8	12.7
9.70833	3.8	2.1	1.5	1.1	0.1	-0.1	0.9	11
9.71528	3.6	2.1	1.5	1.1	0.1	-0.1	0.9	9.4
9.72222	3.5	2.1	1.5	1.1	0.1	-0.1	0.9	9
9.72917	3.3	2.2	1.5	1.1	0.1	-0.1	0.9	8
9.73611	3.1	2.2	1.5	1.1	0.1	-0.1	0.8	7.8
9.74306	3	2.2	1.5	1.1	0.1	-0.1	0.8	7.3
9.75	2.8	2.2	1.5	1.1	0.1	-0.1	0.7	7.3
9.75694	2.7	2.2	1.5	1.1	0.1	-0.1	0.6	6.8
9.76389	2.5	2.2	1.5	1	0.1	-0.1	0.5	6.8
9.77083	2.3	2.2	1.5	1	0.1	-0.1	0.4	6.6
9.77778	2.2	2.2	1.5	1	0.2	-0.1	0.4	6.6
9.78472	2	2.2	1.5	1	0.2	-0.2	0.3	6
9.79167	1.8	2.2	1.5	1	0.2	-0.2	0.1	6.4
9.79861	1.7	2.2	1.5	1	0.2	-0.2	-0.1	6.3
9.80556	1.5	2.2	1.5	1	0.2	-0.2	-0.2	5.1
9.8125	1.4	2.2	1.5	1	0.2	-0.2	-0.3	4.6
9.81944	1.2	2.2	1.5	1	0.2	-0.2	-0.4	4.1
9.82639	1.1	2.2	1.5	1	0.2	-0.3	-0.6	4
9.83333	1	2.1	1.5	1	0.2	-0.3	-0.6	3.9
9.84028	0.9	2.1	1.5	1	0.2	-0.3	-0.7	3.5
9.84722	0.7	2.1	1.5	1	0.2	-0.3	-0.8	3.4
9.85417	0.6	2.1	1.5	1	0.2	-0.3	-0.9	2.9
9.86111	0.4	2.1	1.5	1	0.2	-0.4	-1	2.7
9.86806	0.3	2.1	1.5	1	0.2	-0.4	-1.1	1.3
9.875	0.2	2.1	1.5	1	0.2	-0.4	-1.2	1.7
9.88194	-0.1	2.1	1.5	1	0.2	-0.4	-1.3	1.9
9.88889	-0.2	2.1	1.5	0.9	0.2	-0.4	-1.4	0.3
9.89583	-0.3	2	1.5	0.9	0.2	-0.5	-1.5	0.3
9.90278	-0.4	2	1.5	0.9	0.2	-0.5	-1.6	0.4
9.90972	-0.5	2	1.5	0.9	0.2	-0.5	-1.8	1.1
9.91667	-0.6	2	1.5	0.9	0.2	-0.5	-1.9	-0.3
9.92361	-0.7	2	1.5	0.9	0.2	-0.6	-1.9	-1
9.93056	-0.8	2	1.5	0.9	0.2	-0.6	-2	-1.3
9.9375	-0.9	2	1.5	0.9	0.2	-0.6	-2.1	-0.4
9.94444	-1	2	1.5	0.9	0.2	-0.6	-2.2	-1.7
9.95139	-1.1	1.9	1.4	0.9	0.2	-0.6	-2.3	-2.1
9.95833	-1.2	1.9	1.4	0.9	0.2	-0.7	-2.4	-1
9.96528	-1.3	1.9	1.4	0.9	0.2	-0.7	-2.5	-2.7
9.97222	-1.3	1.9	1.4	0.9	0.2	-0.7	-2.5	-3
9.97917	-1.4	1.9	1.4	0.9	0.2	-0.8	-2.6	-2.8
9.98611	-1.4	1.8	1.4	0.8	0.2	-0.8	-2.7	-1.8
9.99306	-1.5	1.8	1.4	0.8	0.1	-0.8	-2.8	-1.7
10	-1.6	1.8	1.4	0.8	0.1	-0.8	-2.9	-2
10.0069	-1.6	1.8	1.4	0.8	0.1	-0.9	-2.9	-3.6
10.0139	-1.7	1.8	1.4	0.8	0.1	-0.9	-3	-3.2
10.0208	-1.8	1.8	1.4	0.8	0.1	-0.9	-3.1	-3.8
10.0278	-1.9	1.7	1.4	0.8	0.1	-0.9	-3.2	-3.5
10.0347	-2	1.7	1.4	0.8	0.1	-1	-3.3	-3.8
10.0417	-2.1	1.7	1.3	0.8	0.1	-1	-3.3	-3.1
10.0486	-2.2	1.7	1.3	0.8	0.1	-1	-3.4	-3.4
10.0556	-2.3	1.7	1.3	0.8	0.1	-1	-3.5	-3.3
10.0625	-2.3	1.6	1.3	0.8	0.1	-1.1	-3.6	-3.5
10.0694	-2.4	1.6	1.3	0.8	0.1	-1.1	-3.7	-3.2
10.0764	-2.5	1.6	1.3	0.8	0.1	-1.1	-3.7	-3.7
10.0833	-2.5	1.6	1.3	0.8	0.1	-1.1	-3.8	-3.7
10.0903	-2.6	1.5	1.2	0.8	0.1	-1.2	-3.9	-3.6
10.0972	-2.7	1.5	1.2	0.8	0.1	-1.2	-3.9	-3.6
10.1042	-2.8	1.5	1.2	0.8	0.1	-1.2	-4	-4.3
10.1111	-2.8	1.5	1.2	0.8	0.1	-1.2	-4.1	-4.3
10.1181	-2.9	1.5	1.2	0.8	0.1	-1.2	-4.2	-4.2
10.125	-3	1.4	1.2	0.8	0.1	-1.2	-4.2	-4.5
10.1319	-3	1.4	1.2	0.8	-0.1	-1.2	-4.3	-5.2
10.1389	-3.1	1.4	1.2	0.8	-0.1	-1.2	-4.3	-5.8
10.1458	-3.1	1.4	1.2	0.8	-0.1	-1.2	-4.4	-5.6
10.1528	-3.2	1.3	1.1	0.8	-0.1	-1.2	-4.5	-4.9
10.1597	-3.3	1.3	1.1	0.8	-0.1	-1.2	-4.5	-5.1
10.1667	-3.4	1.3	1.1	0.8	-0.1	-1.2	-4.6	-5.3
10.1736	-3.4	1.2	1.1	0.8	-0.1	-1.2	-4.7	-5.5
10.1806	-3.5	1.2	1.1	0.8	-0.1	-1.2	-4.7	-5.8
10.1875	-3.6	1.2	1.1	0.8	-0.1	-1.2	-4.8	-5.7
10.1944	-3.7	1.2	1	0.8	-0.1	-1.2	-4.9	-5.8
10.2014	-3.7	1.2	1	0.8	-0.1	-1.2	-5	-5.8
10.2083	-3.8	1.1	1	0.8	-0.1	-1.2	-5	-6
10.2153	-3.9	1.1	1	0.8	-0.1	-1.1	-5.1	-6.2
10.2222	-3.9	1.1	1	0.8	-0.2	-1.1	-5.2	-6.3
10.2292	-4	1	1	0.8	-0.2	-1.1	-5.2	-6.3
10.2361	-4.1	1	1	0.8	-0.2	-1.1	-5.3	-6.6
10.2431	-4.2	1	1	0.8	-0.2	-1	-5.4	-6.4
10.25	-4.2	1	1	0.8	-0.2	-1	-5.5	-6.7
10.2569	-4.3	1	1	0.8	-0.2	-1	-5.5	-6.6
10.2639	-4.3	0.9	1	0.8	-0.2	-1	-5.6	-7
10.2708	-4.4	0.9	1	0.8	-0.2	-0.9	-5.6	-7
10.2778	-4.5	0.9	0.9	0.8	-0.2	-0.9	-5.7	-6.9
10.2847	-4.5	0.9	0.9	0.8	-0.2	-0.9	-5.8	-7.3
10.2917	-4.6	0.9	0.9	0.8	-0.2	-0.8	-5.8	-7.1
10.2986	-4.6	0.9	0.9	0.8	-0.2	-0.8	-5.9	-7.4
10.3056	-4.6	0.9	0.9	0.8	-0.2	-0.8	-6	-7.7
10.3125	-4.7	0.8	0.9	0.8	-0.2	-0.8	-6	-7.9
10.3194	-4.7	0.8	0.9	0.8	-0.2	-0.7	-6.1	-7.8
10.3264	-4.7	0.8	0.9	0.8	-0.2	-0.7	-6.1	-7.9
10.3333	-4.7	0.8	0.9	0.8	-0.2	-0.7	-6.2	-8.4
10.3403	-4.7	0.8	0.9	0.8	-0.2	-0.6	-6.2	-7.7
10.3472	-4.7	0.8	0.9	0.8	-0.2	-0.6	-6.2	-8.1
10.3542	-4.6	0.8	0.9	0.8	-0.2	-0.6	-6.2	-7.9
10.3611	-4.1	0.9	0.9	0.9	-0.2	-0.5	-6.3	-7.9
10.3681	-3.5	0.9	0.9	0.9	-0.2	-0.5	-6.3	-8.1
10.375	-2.8	0.9	0.9	0.9	-0.2	-0.5	-6.3	-8.3
10.3819	-2.1	0.9	0.9	0.9	-0.2	-0.5	-6.2	-8.4
10.3889	-1.4	0.9	0.9	0.9	-0.2	-0.4	-6.1	-8.3
10.3958	-0.8	0.9	0.9	0.9	-0.2	-0.4	-5.8	-8.3
10.4028	-0.2	0.9	1	0.9	-0.2	-0.4	-5.6	-8.4
10.4097	0.4	0.9	1	0.9	-0.2	-0.4	-5.3	-8.4
10.4167	1	1	1	0.9	-0.2	-0.3	-5.1	-8.3
10.4236	1.5	1	1	0.9	-0.2	-0.3	-4.9	-8.3
10.4306	2	1	1	0.9	-0.2	-0.3	-4.6	-8.3
10.4375	2.5	1	1	0.9	-0.2	-0.3	-4.4	-8.1
10.4444	2.9	1	1	0.9	-0.1	-0.2	-4.1	-7.8
10.4514	3.4	1	1	0.9	-0.1	-0.2	-3.8	-1.6
10.4583	3.9	1.1	1	0.9	-0.1	-0.2	-3.5	1.3
10.4653	4.4	1.1	1	0.9	-0.1	-0.2	-3.3	2.1
10.4722	4.9	1.1	1	0.9	-0.1	-0.1	-3	5.4
10.4792	5.3	1.2	1	0.9	-0.1	-0.1	-2.8	2.6
10.4861	5.6	1.2	1	1	-0.1	-0.1	-2.5	4.1
10.4931	5.7	1.2	1	1	-0.1	-0.1	-2.2	4.3
10.5	5.6	1.2	1	1	-0.1	0.1	-1.9	8
10.5069	5.5	1.3	1	1	-0.1	0.1	-1.6	8.5
10.5139	5.6	1.3	1.1	1	-0.1	0.1	-1.3	9.8
10.5208	5.8	1.3	1.1	1	-0.1	0.2	-1	9
10.5278	6.1	1.4	1.1	1	-0.1	0.2	-0.8	9.6
10.5347	6.1	1.4	1.1	1	-0.1	0.2	-0.6	10.3
10.5417	6.2	1.4	1.1	1	-0.1	0.2	-0.4	11.4
10.5486	6.2	1.4	1.1	1	0.1	0.2	-0.1	11.6
10.5556	6.1	1.5	1.1	1	0.1	0.2	0.4	11.8
10.5625	5.9	1.5	1.1	1	0.1	0.3	0.8	13.5
10.5694	5.8	1.5	1.1	1	0.1	0.3	1	15.4
10.5764	5.8	1.5	1.1	1	0.1	0.3	1.2	13.6
10.5833	5.8	1.5	1.2	1	0.1	0.3	1.4	14.4
10.5903	5.8	1.6	1.2	1	0.1	0.3	1.5	11
10.5972	5.7	1.6	1.2	1	0.1	0.3	1.5	9.8
10.6042	5.6	1.6	1.2	1	0.1	0.3	1.5	10.1
10.6111	5.5	1.6	1.2	1.1	0.2	0.4	1.7	12.6
10.6181	5.4	1.7	1.2	1.1	0.2	0.4	1.7	13.1
10.625	5.2	1.7	1.2	1.1	0.2	0.4	1.9	12.7
10.6319	5.1	1.7	1.2	1.1	0.2	0.4	1.9	12.4
10.6389	4.9	1.7	1.2	1.1	0.2	0.4	2	11.1
10.6458	4.7	1.7	1.2	1.1	0.2	0.4	2.1	11.2
10.6528	4.5	1.7	1.2	1.1	0.2	0.4	2.1	11.4
10.6597	4.3	1.8	1.2	1.1	0.2	0.4	2.1	11.1
10.6667	4.1	1.8	1.2	1.1	0.2	0.4	2.1	11
10.6736	3.9	1.8	1.2	1.1	0.2	0.4	2.1	12.7
10.6806	3.7	1.8	1.3	1.1	0.2	0.4	2.1	12.1
10.6875	3.5	1.8	1.3	1.1	0.2	0.4	2	9.4
10.6944	3.4	1.8	1.3	1.1	0.2	0.4	2	10.6
10.7014	3.4	1.8	1.3	1.1	0.2	0.4	1.9	10.2
10.7083	3.5	1.9	1.3	1.1	0.3	0.4	1.9	10
10.7153	3.6	1.9	1.3	1.1	0.3	0.4	1.8	9.7
10.7222	3.7	1.9	1.3	1.1	0.3	0.4	1.7	9.4
10.7292	3.7	1.9	1.3	1.1	0.3	0.4	1.6	8.4
10.7361	3.7	1.9	1.3	1.1	0.3	0.4	1.7	6.9
10.7431	3.6	1.9	1.3	1.2	0.3	0.4	1.8	7.1
10.75	3.5	2	1.3	1.2	0.3	0.4	1.9	7.3
10.7569	3.4	2	1.3	1.2	0.3	0.4	1.9	6.3
10.7639	3.3	2	1.4	1.2	0.3	0.4	1.9	5.8
10.7708	3.3	2	1.4	1.2	0.3	0.4	1.8	5.7
10.7778	3.3	2	1.4	1.2	0.3	0.4	1.7	5.2
10.7847	3.2	2	1.4	1.2	0.3	0.4	1.7	4.5
10.7917	3.3	2	1.4	1.2	0.3	0.4	1.7	5.8
10.7986	3.2	2	1.4	1.2	0.3	0.4	1.6	7.7
10.8056	3.2	2	1.4	1.2	0.3	0.4	1.6	7.7
10.8125	3.2	2	1.4	1.2	0.3	0.3	1.6	7.5
10.8194	3.2	2	1.4	1.2	0.3	0.3	1.6	7.4
10.8264	3.1	2	1.4	1.2	0.3	0.3	1.6	7.2
10.8333	3.1	2	1.4	1.2	0.3	0.3	1.6	6.1
10.8403	3	2	1.4	1.2	0.3	0.3	1.6	6.2
10.8472	3	2.1	1.4	1.2	0.3	0.3	1.5	6.2
10.8542	2.9	2.1	1.4	1.2	0.4	0.3	1.5	6.3
10.8611	2.8	2.1	1.4	1.2	0.4	0.3	1.5	5.3
10.8681	2.8	2.1	1.4	1.2	0.4	0.2	1.5	5.8
10.875	2.7	2.1	1.4	1.2	0.4	0.2	1.5	6.1
10.8819	2.7	2.1	1.4	1.1	0.4	0.2	1.5	6.1
10.8889	2.6	2.1	1.4	1.1	0.4	0.2	1.4	5.8
10.8958	2.6	2.1	1.4	1.1	0.4	0.2	1.4	5.8
10.9028	2.5	2.1	1.4	1.1	0.4	0.2	1.3	5.6
10.9097	2.4	2.1	1.4	1.1	0.4	0.1	1.2	5.3
10.9167	2.4	2.1	1.4	1.1	0.4	0.1	1.2	5.4
10.9236	2.3	2.1	1.4	1.1	0.4	0.1	1.2	5.3
10.9306	2.1	2	1.4	1.1	0.4	0.1	1.1	5.2
10.9375	2	2	1.4	1.1	0.4	-0.1	1	5.1
10.9444	1.8	2	1.4	1.1	0.4	-0.1	1	4.8
10.9514	1.6	2	1.4	1.1	0.4	-0.1	1	4.4
10.9583	1.4	2	1.4	1.1	0.4	-0.1	0.9	4.7
10.9653	1.2	2	1.4	1.1	0.4	-0.1	0.8	4.3
10.9722	1.1	2	1.4	1.1	0.4	-0.1	0.7	4.3
10.9792	0.9	2	1.4	1.1	0.4	-0.2	0.5	4.3
10.9861	0.8	2	1.4	1.1	0.4	-0.2	0.4	4.2
10.9931	0.6	2	1.4	1.1	0.4	-0.2	0.3	3.9
11	0.5	2	1.4	1.1	0.4	-0.2	0.1	3.9
11.0069	0.4	2	1.4	1.1	0.4	-0.2	-0.1	3.6
11.0139	0.3	2	1.4	1.1	0.3	-0.2	-0.3	3.7
11.0208	0.1	2	1.4	1.1	0.3	-0.2	-0.4	3.5
11.0278	-0.1	2	1.4	1.1	0.3	-0.3	-0.5	2.4
11.0347	-0.2	1.9	1.4	1.1	0.3	-0.3	-0.6	2
11.0417	-0.3	1.9	1.4	1.1	0.3	-0.3	-0.7	1.3
11.0486	-0.4	1.9	1.4	1.1	0.3	-0.3	-0.8	1.1
11.0556	-0.5	1.9	1.4	1.1	0.3	-0.3	-0.9	0.8
11.0625	-0.6	1.9	1.4	1.1	0.3	-0.3	-1	-0.5
11.0694	-0.7	1.9	1.4	1.1	0.3	-0.3	-1.1	-0.7
11.0764	-0.7	1.9	1.4	1.1	0.3	-0.3	-1.2	-0.1
11.0833	-0.8	1.8	1.4	1.1	0.3	-0.2	-1.2	-0.2
11.0903	-0.9	1.8	1.4	1.1	0.3	-0.2	-1.3	-0.2
11.0972	-0.9	1.8	1.4	1.1	0.3	-0.2	-1.4	-0.4
11.1042	-1	1.8	1.4	1.1	0.3	-0.2	-1.5	-1.7
11.1111	-1.1	1.8	1.3	1.2	0.3	-0.2	-1.6	-1.8
11.1181	-1.2	1.8	1.3	1.2	0.3	-0.2	-1.7	-1.3
11.125	-1.3	1.8	1.3	1.2	0.3	-0.1	-1.7	-1.9
11.1319	-1.4	1.7	1.3	1.2	0.3	-0.1	-1.8	-1.6
11.1389	-1.4	1.7	1.3	1.2	0.3	-0.1	-1.9	-2
11.1458	-1.5	1.7	1.3	1.2	0.3	-0.1	-2	-2.4
11.1528	-1.6	1.7	1.3	1.2	0.3	0.1	-2.1	-2.5
11.1597	-1.6	1.7	1.3	1.2	0.3	0.1	-2.2	-2.7
11.1667	-1.7	1.7	1.3	1.2	0.3	0.2	-2.3	-3
11.1736	-1.8	1.7	1.3	1.2	0.3	0.2	-2.3	-2.8
11.1806	-1.9	1.6	1.3	1.2	0.3	0.2	-2.4	-2.1
11.1875	-1.9	1.6	1.3	1.2	0.3	0.3	-2.5	-2.7
11.1944	-2	1.6	1.3	1.2	0.3	0.3	-2.6	-2.7
11.2014	-2.1	1.6	1.2	1.2	0.3	0.4	-2.6	-3.5
11.2083	-2.1	1.6	1.2	1.2	0.3	0.4	-2.7	-3
11.2153	-2.2	1.5	1.2	1.2	0.3	0.4	-2.8	-3.7
11.2222	-2.2	1.5	1.2	1.3	0.3	0.5	-2.9	-4.3
11.2292	-2.3	1.5	1.2	1.3	0.3	0.5	-2.9	-3.8
11.2361	-2.3	1.5	1.2	1.3	0.3	0.5	-3	-3.5
11.2431	-2.4	1.5	1.2	1.3	0.3	0.6	-3.1	-3.4
11.25	-2.4	1.5	1.2	1.3	0.4	0.6	-3.1	-3.8
11.2569	-2.5	1.5	1.2	1.3	0.4	0.7	-3.2	-3.7
11.2639	-2.6	1.5	1.2	1.3	0.4	0.7	-3.3	-4.3
11.2708	-2.6	1.4	1.2	1.3	0.4	0.7	-3.3	-5.2
11.2778	-2.7	1.4	1.2	1.3	0.4	0.8	-3.4	-4.9
11.2847	-2.7	1.4	1.2	1.4	0.4	0.8	-3.5	-5
11.2917	-2.8	1.4	1.2	1.4	0.4	0.8	-3.5	-5.4
11.2986	-2.8	1.4	1.2	1.4	0.4	0.8	-3.6	-4.2
11.3056	-2.9	1.4	1.2	1.4	0.4	0.9	-3.7	-4.2
11.3125	-2.9	1.4	1.3	1.4	0.4	0.9	-3.7	-4.8
11.3194	-2.9	1.4	1.3	1.4	0.4	0.9	-3.8	-4.3
11.3264	-2.9	1.4	1.3	1.4	0.4	0.9	-3.8	-4.8
11.3333	-2.9	1.4	1.3	1.4	0.4	1	-3.8	-5.2
11.3403	-2.9	1.4	1.3	1.4	0.4	1	-3.8	-4.7
11.3472	-2.8	1.5	1.3	1.4	0.4	1	-3.9	-5.3
11.3542	-2.3	1.5	1.3	1.4	0.5	1	-3.8	-5
11.3611	-1.6	1.5	1.3	1.4	0.5	1	-3.8	-5.1
11.3681	-1	1.5	1.3	1.5	0.5	1	-3.8	-5.2
11.375	-0.3	1.5	1.4	1.5	0.5	1.1	-3.8	-5.8
11.3819	0.4	1.5	1.4	1.5	0.5	1.1	-3.7	-5.8
11.3889	1.1	1.6	1.4	1.5	0.5	1.1	-3.4	-5.5
11.3958	1.8	1.6	1.4	1.5	0.5	1.1	-3.2	-5.5
11.4028	2.6	1.6	1.4	1.5	0.5	1.1	-3	-5.5
11.4097	3.3	1.7	1.4	1.5	0.5	1.2	-2.8	-5.6
11.4167	4.1	1.7	1.4	1.5	0.5	1.2	-2.5	-6
11.4236	4.8	1.7	1.4	1.5	0.5	1.2	-2.3	-6.1
11.4306	5.5	1.8	1.5	1.5	0.5	1.2	-2	-5.8
11.4375	6.2	1.8	1.5	1.5	0.6	1.2	-1.8	-5.4
11.4444	6.7	1.8	1.5	1.5	0.6	1.2	-1.5	-5.2
11.4514	7.3	1.8	1.5	1.6	0.6	1.2	-1.2	4.2
11.4583	8	1.9	1.5	1.6	0.6	1.2	-0.9	6.5
11.4653	8.7	1.9	1.5	1.6	0.6	1.2	-0.6	5.7
11.4722	9.2	2	1.5	1.6	0.6	1.2	-0.3	6.7
11.4792	9.5	2	1.6	1.6	0.6	1.2	0.3	5.9
11.4861	9.8	2	1.6	1.6	0.6	1.2	0.5	7.5
11.4931	9.9	2.1	1.6	1.6	0.7	1.2	0.9	10.8
11.5	10	2.1	1.6	1.6	0.7	1.2	1.1	13.2
11.5069	10.1	2.2	1.6	1.6	0.7	1.2	1.3	16.6
11.5139	10.4	2.2	1.7	1.6	0.7	1.2	1.5	18
11.5208	10.7	2.2	1.7	1.6	0.7	1.2	1.8	20
11.5278	10.9	2.3	1.7	1.7	0.7	1.2	1.9	16.9
11.5347	10.9	2.3	1.7	1.7	0.7	1.2	2.1	22.2
11.5417	10.8	2.4	1.7	1.7	0.7	1.2	2.3	21.2
11.5486	10.6	2.4	1.7	1.7	0.7	1.2	2.5	16.4
11.5556	10.4	2.4	1.7	1.7	0.7	1.2	2.7	15.8
11.5625	10.3	2.4	1.7	1.7	0.7	1.2	2.8	27.7
11.5694	10.4	2.5	1.8	1.7	0.8	1.2	3	21.3
11.5764	10.5	2.5	1.8	1.7	0.8	1.2	3.2	20.6
11.5833	10.6	2.6	1.8	1.7	0.8	1.2	3.3	18.3
11.5903	10.5	2.6	1.8	1.7	0.8	1.2	3.5	22.6
11.5972	9.9	2.6	1.8	1.7	0.8	1.2	3.6	18.6
11.6042	9.1	2.6	1.8	1.7	0.8	1.2	3.8	19.2
11.6111	8.4	2.6	1.8	1.7	0.8	1.2	3.8	17.7
11.6181	7.7	2.7	1.8	1.7	0.8	1.1	3.8	25
11.625	7.1	2.7	1.9	1.7	0.8	1.1	3.7	17.2
11.6319	6.6	2.7	1.9	1.7	0.8	1.1	3.5	21
11.6389	6.3	2.8	1.9	1.7	0.8	1.1	3.4	20.1
11.6458	5.9	2.8	1.9	1.7	0.8	1.1	3.2	17.1
11.6528	5.7	2.8	1.9	1.7	0.8	1.1	3.2	17.1
11.6597	5.6	2.8	1.9	1.7	0.8	1.1	3.1	15.3
11.6667	5.4	2.8	2	1.7	0.9	1	3	14.7
11.6736	5.2	2.8	2	1.7	0.9	1	2.9	17.5
11.6806	5.1	2.9	2	1.7	0.9	1	2.8	17.8
11.6875	4.9	2.9	2	1.7	0.9	1	2.9	19.5
11.6944	4.8	2.9	2	1.8	0.9	1	2.8	15.1
11.7014	4.7	2.9	2	1.8	0.9	1	2.8	11.5
11.7083	4.5	2.9	2	1.8	0.9	0.9	2.7	9.7
11.7153	4.4	2.9	2	1.8	0.9	0.9	2.7	8.7
11.7222	4.2	2.9	2	1.8	0.9	0.9	2.6	8.8
11.7292	4.1	3	2	1.8	0.9	0.9	2.5	7.8
11.7361	3.9	3	2	1.8	0.9	0.9	2.5	7.8
11.7431	3.8	3	2	1.8	0.9	0.9	2.4	7.6
11.75	3.6	3	2	1.8	0.9	0.8	2.3	7.4
11.7569	3.4	3	2.1	1.8	0.9	0.8	2.2	7.3
11.7639	3.2	3	2.1	1.8	0.9	0.8	2	7.3
11.7708	3	3	2.1	1.8	0.9	0.8	1.9	6.9
11.7778	2.9	3	2.1	1.8	0.9	0.8	1.8	6.7
11.7847	2.8	3	2.1	1.8	0.9	0.7	1.7	6.8
11.7917	2.8	3	2.1	1.8	0.9	0.7	1.5	6.4
11.7986	2.8	3	2.1	1.8	0.9	0.7	1.4	6
11.8056	2.8	3	2.1	1.8	0.9	0.7	1.2	5.8
11.8125	2.8	3	2.1	1.8	0.9	0.6	1.1	5.6
11.8194	2.8	3	2.1	1.8	0.9	0.6	1.1	5.2
11.8264	2.8	3	2.1	1.8	0.9	0.6	1.2	4.7
11.8333	2.8	3	2.1	1.8	1	0.5	1.2	4.6
11.8403	2.7	3	2.1	1.7	1	0.5	1.2	3.7
11.8472	2.6	3	2.1	1.7	1	0.5	1.1	3.5
11.8542	2.5	3	2.1	1.7	1	0.5	1.1	3.4
11.8611	2.4	3	2.1	1.7	1	0.4	1	2.9
11.8681	2.3	3	2.1	1.7	1	0.4	1	2.5
11.875	2.2	3	2.1	1.7	1	0.4	0.9	1.7
11.8819	2.2	3	2.2	1.7	1	0.4	0.8	1.8
11.8889	2.1	3	2.2	1.7	1	0.3	0.7	1.9
11.8958	2	3	2.2	1.7	1	0.3	0.7	4.1
11.9028	1.9	3	2.2	1.7	1	0.3	0.6	4.1
11.9097	1.8	3	2.2	1.7	1	0.3	0.5	3.7
11.9167	1.7	3	2.2	1.7	1	0.2	0.5	3.7
11.9236	1.6	2.9	2.2	1.7	1	0.2	0.4	3.6
11.9306	1.4	2.9	2.2	1.7	1	0.2	0.4	3.3
11.9375	1.3	2.9	2.1	1.7	1	0.2	0.3	3.3
11.9444	1.2	2.9	2.1	1.7	1	0.1	0.1	2.8
11.9514	1	2.9	2.1	1.7	1	0.1	-0.1	2.2
11.9583	0.9	2.9	2.1	1.7	1	0.1	-0.2	2.4
11.9653	0.8	2.9	2.1	1.7	0.9	-0.1	-0.3	2
11.9722	0.7	2.9	2.1	1.7	0.9	-0.1	-0.4	2
11.9792	0.6	2.8	2.1	1.7	0.9	-0.1	-0.5	1.8
11.9861	0.5	2.8	2.1	1.7	0.9	-0.1	-0.6	2
11.9931	0.3	2.8	2.1	1.7	0.9	-0.1	-0.7	1.6
12	0.2	2.8	2.1	1.7	0.9	-0.1	-0.8	1.3
12.0069	0.1	2.8	2.1	1.7	0.9	-0.1	-0.9	0.9
12.0139	-0.1	2.8	2.1	1.7	0.9	-0.1	-1	1
12.0208	-0.2	2.8	2.1	1.7	0.9	-0.1	-1.1	0.5
12.0278	-0.3	2.7	2.1	1.6	0.9	-0.1	-1.2	0.3
12.0347	-0.4	2.7	2.1	1.6	0.9	-0.1	-1.3	0.2
12.0417	-0.5	2.7	2.1	1.6	0.9	-0.1	-1.4	-0.1
12.0486	-0.6	2.7	2.1	1.6	0.9	-0.1	-1.5	-0.3
12.0556	-0.6	2.7	2.1	1.6	0.9	-0.1	-1.6	-0.6
12.0625	-0.7	2.6	2.1	1.6	0.9	-0.1	-1.7	-0.7
12.0694	-0.8	2.6	2.1	1.6	0.9	0.1	-1.8	-0.9
12.0764	-0.9	2.6	2.1	1.6	0.9	0.1	-1.9	-1.3
12.0833	-1	2.6	2.1	1.6	0.9	0.1	-1.9	-1.3
12.0903	-1.1	2.6	2	1.6	0.9	0.2	-2	-1.8
12.0972	-1.2	2.5	2	1.6	0.9	0.2	-2.1	-2.1
12.1042	-1.3	2.5	2	1.6	0.9	0.2	-2.2	-1.8
12.1111	-1.3	2.5	2	1.6	0.9	0.3	-2.3	-2.3
12.1181	-1.4	2.5	2	1.6	0.9	0.3	-2.4	-2.3
12.125	-1.5	2.4	2	1.6	0.9	0.4	-2.5	-2.4
12.1319	-1.6	2.4	2	1.6	0.9	0.4	-2.6	-2.5
12.1389	-1.7	2.4	2	1.6	0.9	0.4	-2.6	-2.8
12.1458	-1.8	2.4	2	1.7	0.8	0.5	-2.7	-3.2
12.1528	-1.9	2.4	2	1.7	0.8	0.5	-2.9	-3.2
12.1597	-1.9	2.4	2	1.7	0.8	0.5	-3	-3.4
12.1667	-2	2.3	2	1.7	0.8	0.6	-3.1	-3.4
12.1736	-2.1	2.3	2	1.7	0.8	0.6	-3.1	-3.7
12.1806	-2.2	2.3	1.9	1.7	0.8	0.6	-3.2	-3.8
12.1875	-2.2	2.2	1.9	1.7	0.8	0.7	-3.3	-3.9
12.1944	-2.3	2.2	1.9	1.7	0.8	0.7	-3.4	-4
12.2014	-2.4	2.2	1.9	1.7	0.8	0.7	-3.4	-4.4
12.2083	-2.4	2.2	1.9	1.7	0.8	0.8	-3.5	-4.1
12.2153	-2.5	2.2	1.9	1.7	0.8	0.8	-3.5	-4.4
12.2222	-2.6	2.1	1.9	1.7	0.8	0.8	-3.6	-4.3
12.2292	-2.6	2.1	1.9	1.7	0.8	0.8	-3.7	-4.8
12.2361	-2.7	2.1	1.9	1.7	0.8	0.9	-3.7	-4.7
12.2431	-2.8	2.1	1.9	1.7	0.8	0.9	-3.8	-4.8
12.25	-2.9	2	1.9	1.7	0.8	0.9	-3.9	-5.2
12.2569	-3	2	1.9	1.7	0.8	0.9	-4	-5.3
12.2639	-3	2	1.9	1.7	0.8	0.9	-4	-5.4
12.2708	-3.1	2	1.9	1.7	0.8	1	-4.2	-5.4
12.2778	-3.1	2	1.9	1.7	0.9	1	-4.2	-5.5
12.2847	-3.1	2	1.9	1.7	0.9	1	-4.3	-5.7
12.2917	-3.1	2	1.9	1.8	0.9	1	-4.4	-5.8
12.2986	-3.2	2	1.9	1.8	0.9	1	-4.4	-5.8
12.3056	-3.2	2	1.9	1.8	0.9	1	-4.4	-5.7
12.3125	-3.2	1.9	1.9	1.8	0.9	1	-4.4	-6.3
12.3194	-3.2	1.9	1.9	1.8	0.9	1.1	-4.4	-5.9
12.3264	-3.2	2	1.9	1.8	0.9	1.1	-4.4	-6.1
12.3333	-3.2	2	1.9	1.8	0.9	1.1	-4.4	-6.4
12.3403	-3	2	1.9	1.8	0.9	1.1	-4.4	-6.5
12.3472	-2.6	2	1.9	1.8	0.9	1.1	-4.4	-6.6
12.3542	-1.9	2	1.9	1.8	0.9	1.1	-4.4	-6.7
12.3611	-1.3	2	1.9	1.8	0.9	1.1	-4.3	-6.7
12.3681	-0.5	2	1.9	1.8	0.9	1.1	-4.3	-6.9
12.375	0.2	2	1.9	1.8	0.9	1.1	-4.1	-6.9
12.3819	0.9	2	1.9	1.8	0.9	1.1	-3.8	-6.9
12.3889	1.6	2	1.9	1.8	0.9	1.1	-3.6	-7
12.3958	2.2	2.1	2	1.8	0.9	1.1	-3.4	-6.6
12.4028	2.8	2.1	2	1.8	0.9	1.1	-3.1	-6.5
12.4097	3.4	2.1	2	1.8	0.9	1.2	-2.9	-6.4
12.4167	3.9	2.1	2	1.9	0.9	1.1	-2.7	-6.4
12.4236	4.5	2.2	2	1.9	1	1.1	-2.5	-6.2
12.4306	5	2.2	2	1.9	1	1.1	-2.2	-6.3
12.4375	5.6	2.2	2	1.9	1	1.1	-2	-6.1
12.4444	6	2.2	2	1.9	1	1.1	-1.8	-5.9
12.4514	6.5	2.3	2	1.9	1	1.1	-1.5	-0.4
12.4583	7	2.3	2	1.9	1	1.1	-1.3	5.5
12.4653	7.5	2.4	2.1	1.9	1	1.1	-1	5.2
12.4722	7.9	2.4	2.1	1.9	1	1.1	-0.8	7.1
12.4792	8.4	2.4	2.1	1.9	1	1.1	-0.5	10.2
12.4861	8.8	2.5	2.1	1.9	1	1.1	-0.3	9.3
12.4931	9.2	2.5	2.1	1.9	1	1.1	0.2	10.3
12.5	9.6	2.5	2.1	1.9	1	1.1	0.5	8.9
12.5069	9.9	2.6	2.1	1.9	1	1.1	0.7	9.8
12.5139	10.3	2.6	2.2	1.9	1	1.1	1	11.7
12.5208	10.6	2.6	2.2	1.9	1	1.1	1.2	10.5
12.5278	10.8	2.7	2.2	2	1	1.1	1.4	11.7
12.5347	11.1	2.7	2.2	2	1.1	1	1.7	15.6
12.5417	11.2	2.7	2.2	2	1.1	1	1.9	15
12.5486	11.3	2.8	2.2	2	1.1	1	2	15.5
12.5556	11.4	2.8	2.2	2	1.1	1	2.2	18
12.5625	10.9	2.8	2.2	2	1.1	1	2.4	16.7
12.5694	10.4	2.8	2.2	2	1.1	1	2.6	17.9
12.5764	10.1	2.9	2.3	2	1.1	1	2.8	17.4
12.5833	9.5	2.9	2.3	2	1.1	1	2.7	15.9
12.5903	8.9	2.9	2.3	2	1.1	1	2.8	17.2
12.5972	8.2	2.9	2.3	2	1.1	1	3	18.6
12.6042	7.6	3	2.3	2	1.1	0.9	3	20.4
12.6111	7.1	3	2.3	2	1.1	0.9	2.9	16.7
12.6181	6.7	3	2.3	2	1.1	0.9	2.8	21
12.625	6.3	3	2.3	2	1.1	0.9	2.7	18.8
12.6319	5.9	3	2.4	2	1.1	0.9	2.6	20.9
12.6389	5.7	3.1	2.4	2	1.1	0.9	2.5	22.2
12.6458	5.4	3.1	2.4	2	1.1	0.9	2.4	23.2
12.6528	5.2	3.1	2.4	2	1.2	0.9	2.3	19
12.6597	4.9	3.1	2.4	2	1.2	0.8	2.2	16.8
12.6667	4.8	3.1	2.4	2	1.2	0.8	2.2	19.7
12.6736	4.6	3.1	2.4	2	1.2	0.8	2.1	11.9
12.6806	4.5	3.2	2.4	2	1.2	0.8	2.1	15.2
12.6875	4.3	3.2	2.4	2	1.2	0.8	2	12.6
12.6944	4.1	3.2	2.4	2	1.2	0.8	2	10.7
12.7014	4	3.2	2.4	2	1.2	0.8	1.9	10.3
12.7083	3.8	3.2	2.4	2	1.2	0.7	1.8	8.8
12.7153	3.7	3.2	2.4	2	1.2	0.7	1.8	8.7
12.7222	3.5	3.2	2.4	2	1.2	0.7	1.7	8.7
12.7292	3.4	3.2	2.4	2	1.2	0.7	1.5	7.9
12.7361	3.2	3.2	2.4	2	1.2	0.7	1.4	7.6
12.7431	3.1	3.2	2.4	2	1.2	0.7	1.4	7
12.75	3	3.2	2.4	2	1.2	0.6	1.2	6.7
12.7569	2.8	3.2	2.4	2	1.2	0.6	1.2	6.6
12.7639	2.6	3.2	2.5	2	1.2	0.6	1	6.5
12.7708	2.5	3.2	2.5	2	1.2	0.6	0.9	5.4
12.7778	2.3	3.2	2.5	2	1.2	0.5	0.8	5.5
12.7847	2.2	3.2	2.5	2	1.2	0.5	0.7	5.7
12.7917	2	3.2	2.5	2	1.2	0.5	0.5	5
12.7986	1.9	3.2	2.5	2	1.2	0.5	0.5	4.9
12.8056	1.8	3.2	2.5	2	1.2	0.5	0.3	4.6
12.8125	1.7	3.2	2.5	2	1.2	0.4	0.2	4.1
12.8194	1.6	3.2	2.5	2	1.2	0.4	0.2	3.5
12.8264	1.5	3.2	2.5	2	1.2	0.4	0.1	3.3
12.8333	1.4	3.2	2.5	2	1.2	0.4	-0.1	3.2
12.8403	1.4	3.2	2.5	2	1.2	0.4	-0.1	3.1
12.8472	1.3	3.2	2.5	2	1.2	0.3	-0.2	2.8
12.8542	1.2	3.2	2.5	2	1.2	0.3	-0.3	2.3
12.8611	1.2	3.2	2.5	2	1.2	0.3	-0.3	1.7
12.8681	1.2	3.2	2.5	2	1.2	0.3	-0.4	2
12.875	1.1	3.2	2.5	2	1.2	0.3	-0.4	0.8
12.8819	1	3.2	2.5	2	1.2	0.2	-0.5	1.6
12.8889	1	3.1	2.5	2	1.2	0.2	-0.5	0.6
12.8958	0.9	3.1	2.5	2	1.2	0.2	-0.6	0.2
12.9028	0.8	3.1	2.5	1.9	1.2	0.2	-0.7	1.2
12.9097	0.7	3.1	2.5	1.9	1.2	0.2	-0.8	0.8
12.9167	0.6	3.1	2.5	1.9	1.2	0.2	-0.9	0.8
12.9236	0.5	3.1	2.4	1.9	1.2	0.1	-1	-0.3
12.9306	0.4	3.1	2.4	1.9	1.2	0.1	-1	0.2
12.9375	0.4	3.1	2.4	1.9	1.2	0.1	-1.1	0.5
12.9444	0.4	3	2.4	1.9	1.2	0.1	-1.1	-0.9
12.9514	0.4	3	2.4	1.9	1.2	0.1	-1.2	-1
12.9583	0.3	3	2.4	1.9	1.2	0.1	-1.2	0.1
12.9653	0.3	3	2.4	1.9	1.2	0.1	-1.2	0.3
12.9722	0.3	3	2.4	1.9	1.2	0.1	-1.2	-0.6
12.9792	0.2	3	2.4	1.9	1.2	0.1	-1.2	-0.5
12.9861	0.2	3	2.4	1.9	1.2	0.1	-1.3	-0.8
12.9931	0.2	3	2.4	1.9	1.2	0.1	-1.3	-1
13	0.2	3	2.4	1.9	1.2	0.1	-1.3	-1.2
13.0069	0.1	2.9	2.4	1.9	1.2	0.1	-1.3	-0.6
13.0139	0.1	2.9	2.4	1.9	1.2	0.1	-1.3	-1.1
13.0208	-0.1	2.9	2.4	1.9	1.1	0.2	-1.4	-1.1
13.0278	-0.1	2.9	2.4	1.9	1.1	0.2	-1.4	-1.3
13.0347	-0.2	2.9	2.4	1.9	1.1	0.2	-1.5	-1.9
13.0417	-0.2	2.8	2.4	1.9	1.1	0.2	-1.6	-2.3
13.0486	-0.3	2.8	2.4	1.9	1.1	0.2	-1.6	-1
13.0556	-0.3	2.8	2.4	1.9	1.1	0.3	-1.6	-1.1
13.0625	-0.4	2.8	2.4	1.9	1.1	0.3	-1.7	-1.5
13.0694	-0.5	2.8	2.4	1.9	1.1	0.3	-1.7	-1.9
13.0764	-0.5	2.8	2.4	1.9	1.1	0.3	-1.8	-2
13.0833	-0.6	2.8	2.3	1.9	1.1	0.4	-1.9	-2.2
13.0903	-0.7	2.7	2.3	1.8	1.1	0.4	-1.9	-2.3
13.0972	-0.8	2.7	2.3	1.9	1.1	0.4	-2	-1.3
13.1042	-0.8	2.7	2.3	1.9	1.1	0.4	-2	-1.4
13.1111	-0.9	2.7	2.3	1.9	1.1	0.5	-2.1	-1.5
13.1181	-1	2.6	2.3	1.9	1.1	0.5	-2.2	-1.4
13.125	-1.1	2.6	2.3	1.9	1.1	0.5	-2.3	-1.4
13.1319	-1.2	2.6	2.3	1.9	1.1	0.5	-2.3	-1.9
13.1389	-1.3	2.6	2.3	1.9	1.1	0.6	-2.4	-2.2
13.1458	-1.3	2.6	2.2	1.9	1.1	0.6	-2.5	-2.3
13.1528	-1.4	2.6	2.2	1.9	1	0.7	-2.6	-2.1
13.1597	-1.5	2.5	2.2	1.9	1	0.7	-2.6	-2.4
13.1667	-1.6	2.5	2.2	1.9	1	0.7	-2.7	-2.3
13.1736	-1.7	2.5	2.2	1.9	1	0.7	-2.8	-2.4
13.1806	-1.7	2.5	2.2	1.9	1	0.8	-2.9	-2.8
13.1875	-1.8	2.4	2.2	1.9	1	0.8	-2.9	-2.7
13.1944	-1.9	2.4	2.2	1.9	1	0.8	-3	-3
13.2014	-1.9	2.4	2.2	1.9	1	0.8	-3.1	-3.1
13.2083	-2	2.4	2.2	1.9	1	0.9	-3.1	-3.2
13.2153	-2.1	2.4	2.2	1.9	1	0.9	-3.2	-3.1
13.2222	-2.1	2.4	2.2	1.9	1	0.9	-3.3	-3
13.2292	-2.2	2.3	2.2	1.9	1	0.9	-3.3	-3.5
13.2361	-2.3	2.3	2.2	1.9	1	1	-3.4	-3.8
13.2431	-2.3	2.3	2.2	1.9	1	1	-3.5	-3.7
13.25	-2.4	2.3	2.2	1.9	1.1	1	-3.6	-3.8
13.2569	-2.4	2.3	2.2	1.9	1.1	1	-3.6	-3.9
13.2639	-2.5	2.2	2.1	1.9	1.1	1.1	-3.7	-4.2
13.2708	-2.5	2.2	2.1	2	1.1	1.1	-3.8	-4.5
13.2778	-2.6	2.2	2.1	2	1.1	1.1	-3.8	-4.3
13.2847	-2.6	2.2	2.1	2	1.1	1.1	-3.9	-4.7
13.2917	-2.6	2.2	2.1	2	1.1	1.2	-3.9	-4.6
13.2986	-2.6	2.2	2.1	2	1.1	1.2	-4	-4.6
13.3056	-2.7	2.2	2.1	2	1.1	1.2	-4	-4.7
13.3125	-2.7	2.2	2.1	2	1.1	1.2	-4	-4.7
13.3194	-2.6	2.2	2.1	2	1.1	1.2	-4	-4.9
13.3264	-2.5	2.2	2.1	2	1.1	1.2	-4	-4.9
13.3333	-2	2.2	2.2	2	1.1	1.2	-4	-5.1
13.3403	-1.4	2.2	2.2	2	1.1	1.3	-4	-5.1
13.3472	-0.7	2.2	2.2	2	1.1	1.3	-3.9	-5.2
13.3542	0.7	2.2	2.2	2	1.1	1.3	-3.9	-5.1
13.3611	1.4	2.2	2.2	2	1.2	1.3	-3.6	-5.5
13.3681	2.1	2.2	2.2	2	1.2	1.3	-3.4	-5.6
13.375	2.8	2.2	2.2	2	1.2	1.3	-3.2	-5.4
13.3819	3.4	2.3	2.2	2	1.2	1.3	-3	-5.6
13.3889	4.1	2.3	2.2	2	1.2	1.3	-2.7	-5.6
13.3958	4.7	2.3	2.2	2.1	1.2	1.3	-2.5	-5.7
13.4028	5.3	2.3	2.2	2.1	1.2	1.4	-2.3	-5.8
13.4097	5.9	2.4	2.2	2.1	1.2	1.4	-2	-5.8
13.4167	6.4	2.4	2.2	2.1	1.2	1.4	-1.8	-5.8
13.4236	6.9	2.4	2.2	2.1	1.2	1.4	-1.5	-5.7
13.4306	7.3	2.4	2.2	2.1	1.2	1.4	-1.2	-5.6
13.4375	7.7	2.4	2.2	2.1	1.2	1.4	-1	-5.5
13.4444	8	2.5	2.2	2.1	1.2	1.4	-0.7	-5.3
13.4514	8	2.5	2.2	2.1	1.2	1.4	-0.4	3.9
13.4583	8.2	2.5	2.3	2.1	1.3	1.4	-0.2	7.2
13.4653	8.3	2.6	2.3	2.1	1.3	1.4	0.1	4
13.4722	8.3	2.6	2.3	2.1	1.3	1.4	0.4	8.8
13.4792	8.4	2.6	2.3	2.1	1.3	1.4	0.7	9.7
13.4861	8.6	2.6	2.3	2.1	1.3	1.3	0.9	12.7
13.4931	8.7	2.6	2.3	2.1	1.3	1.3	1.1	13.7
13.5	8.7	2.7	2.3	2.1	1.3	1.3	1.2	10.7
13.5069	8.6	2.7	2.3	2.2	1.3	1.3	1.5	9.5
13.5139	8.3	2.7	2.4	2.2	1.3	1.3	1.7	12.9
13.5208	8	2.8	2.4	2.2	1.3	1.3	2.1	13.6
13.5278	7.6	2.8	2.4	2.2	1.3	1.3	2.2	16.8
13.5347	7.5	2.8	2.4	2.2	1.4	1.3	2.4	17
13.5417	7.3	2.8	2.4	2.2	1.4	1.3	2.6	22.5
13.5486	7.2	2.9	2.4	2.2	1.4	1.3	2.7	14
13.5556	7.1	2.9	2.4	2.2	1.4	1.2	2.8	21.1
13.5625	7.1	2.9	2.4	2.2	1.4	1.2	3	15.2
13.5694	7	2.9	2.4	2.2	1.4	1.2	3.2	21.6
13.5764	6.7	3	2.4	2.2	1.4	1.2	3.4	11.5
13.5833	6.5	3	2.4	2.2	1.4	1.2	3.5	13.1
13.5903	6.3	3	2.4	2.2	1.4	1.2	3.5	19.9
13.5972	6.2	3	2.4	2.2	1.4	1.2	3.6	16.6
13.6042	6	3	2.5	2.2	1.4	1.2	3.6	14
13.6111	5.9	3	2.5	2.2	1.4	1.1	3.7	16.9
13.6181	5.8	3.1	2.5	2.2	1.4	1.1	3.7	16.4
13.625	5.7	3.1	2.5	2.2	1.4	1.1	3.7	21.6
13.6319	5.6	3.1	2.5	2.2	1.4	1.1	3.7	13.7
13.6389	5.5	3.1	2.5	2.2	1.4	1.1	3.7	14.1
13.6458	5.4	3.1	2.5	2.2	1.4	1	3.7	12.3
13.6528	5.3	3.2	2.5	2.2	1.4	1	3.6	10.7
13.6597	5.1	3.2	2.5	2.2	1.4	1	3.6	10.9
13.6667	5	3.2	2.5	2.2	1.4	1	3.5	11.8
13.6736	4.8	3.2	2.5	2.2	1.4	1	3.5	11
13.6806	4.6	3.2	2.6	2.2	1.4	1	3.5	10.6
13.6875	4.5	3.2	2.6	2.2	1.4	0.9	3.4	12.5
13.6944	4.3	3.2	2.6	2.2	1.5	0.9	3.3	11.6
13.7014	4.1	3.2	2.6	2.2	1.5	0.9	3.2	10.2
13.7083	4	3.2	2.6	2.2	1.5	0.9	3.1	10.2
13.7153	3.8	3.2	2.6	2.2	1.5	0.9	3	9.6
13.7222	3.7	3.2	2.6	2.2	1.5	0.8	2.8	9.4
13.7292	3.6	3.2	2.6	2.2	1.5	0.8	2.7	9.2
13.7361	3.5	3.2	2.6	2.2	1.5	0.8	2.6	8.9
13.7431	3.4	3.3	2.6	2.2	1.5	0.8	2.5	8.7
13.75	3.3	3.3	2.6	2.2	1.5	0.8	2.4	8.5
13.7569	3.2	3.3	2.6	2.2	1.5	0.7	2.3	8.4
13.7639	3.1	3.3	2.6	2.2	1.5	0.7	2.2	8.2
13.7708	3	3.3	2.6	2.2	1.5	0.7	2.1	7.9
13.7778	2.8	3.3	2.6	2.2	1.5	0.7	2	7.6
13.7847	2.7	3.3	2.6	2.2	1.5	0.7	2	7.4
13.7917	2.5	3.3	2.6	2.2	1.5	0.6	1.9	6.9
13.7986	2.3	3.3	2.6	2.2	1.5	0.6	1.8	6.3
13.8056	2.1	3.3	2.6	2.2	1.5	0.6	1.7	6.1
13.8125	2	3.3	2.6	2.2	1.5	0.5	1.5	5.6
13.8194	1.8	3.2	2.6	2.2	1.5	0.5	1.4	5
13.8264	1.7	3.2	2.6	2.2	1.5	0.5	1.2	4.6
13.8333	1.5	3.2	2.6	2.2	1.5	0.5	1.1	4.4
13.8403	1.4	3.2	2.6	2.2	1.5	0.4	0.9	4.2
13.8472	1.3	3.2	2.6	2.2	1.5	0.4	0.8	3.9
13.8542	1.2	3.2	2.6	2.2	1.5	0.4	0.7	3.6
13.8611	1	3.2	2.6	2.1	1.5	0.4	0.6	4.1
13.8681	0.9	3.2	2.6	2.1	1.5	0.3	0.4	3.9
13.875	0.8	3.2	2.6	2.1	1.5	0.3	0.3	3.2
13.8819	0.7	3.2	2.6	2.1	1.5	0.3	0.2	3
[truncated: 1,425 more rows]
