# Supplementary material for: Temperature Load Parameters and Thermal Effects of a Long‐Span Concrete‐Filled Steel Tube Arch Bridge in Tibet
Source: Hindawi journal article supplement (doi:10.1155/2020/9710613), 2020-01-01
Supplement: f1 [file 9710613.f1.zip › 9710613.f1/fig.6(a).xls]

## Sheet: Sheet1
time	1	2	3	4	5	6	7	8
0.166667	20.7	22.2	20.5	19.4	20.4	20.2	21.3	19.6
0.333333	20.6	22.2	20.5	19.4	20.5	20.2	21.2	19.6
0.5	20.5	22.2	20.5	19.4	20.5	20.2	21.1	19.7
0.666667	20.4	22.2	20.6	19.4	20.5	20.2	21	19.4
0.833333	20.4	22.2	20.6	19.4	20.5	20.2	20.9	19.2
1	20.3	22.2	20.6	19.4	20.5	20.2	20.8	18.9
1.16667	20.2	22.2	20.6	19.4	20.6	20.2	20.7	19.1
1.33333	20.1	22.2	20.6	19.5	20.6	20.2	20.6	19.1
1.5	20	22.2	20.7	19.5	20.6	20.2	20.5	18.6
1.66667	19.9	22.2	20.7	19.5	20.6	20.2	20.4	18.9
1.83333	19.9	22.2	20.7	19.5	20.6	20.2	20.3	18.7
2	19.9	22.2	20.7	19.5	20.7	20.2	20.3	18.6
2.16667	19.8	22.2	20.7	19.5	20.7	20.2	20.2	18.6
2.33333	19.8	22.2	20.7	19.5	20.7	20.2	20.1	18.4
2.5	19.7	22.2	20.8	19.6	20.7	20.2	20	18.4
2.66667	19.7	22.2	20.8	19.6	20.7	20.2	20	18.3
2.83333	19.6	22.2	20.8	19.6	20.7	20.2	19.9	18.4
3	19.6	22.2	20.8	19.6	20.8	20.2	19.8	18.3
3.16667	19.5	22.2	20.8	19.6	20.8	20.2	19.8	18.1
3.33333	19.5	22.2	20.8	19.6	20.8	20.1	19.7	18
3.5	19.4	22.2	20.9	19.6	20.8	20.1	19.6	18.2
3.66667	19.3	22.2	20.9	19.7	20.8	20.1	19.5	18
3.83333	19.2	22.2	20.9	19.7	20.8	20.1	19.5	18
4	19.2	22.2	20.9	19.7	20.8	20.1	19.4	18
4.16667	19.1	22.2	20.9	19.7	20.9	20.1	19.3	18.2
4.33333	19.1	22.2	20.9	19.7	20.9	20.1	19.3	18.2
4.5	19.1	22.2	20.9	19.7	20.9	20.1	19.3	18
4.66667	19	22.2	21	19.7	20.9	20	19.2	17.9
4.83333	19	22.2	21	19.8	20.9	20	19.2	18
5	19	22.1	21	19.8	20.9	20	19.1	17.9
5.16667	19	22.1	21	19.8	20.9	20	19.1	17.8
5.33333	18.9	22.1	21	19.8	21	20	19	17.6
5.5	18.9	22	21	19.8	21	20	19	17.7
5.66667	18.8	22	21	19.8	21	19.9	18.9	17.7
5.83333	18.8	22	21	19.8	21	19.9	18.8	17.4
6	18.7	22	21.1	19.8	21	19.9	18.8	17.4
6.16667	18.7	22	21.1	19.9	21	19.9	18.7	17.3
6.33333	18.6	22	21.2	19.9	21	19.9	18.6	17.2
6.5	18.5	22	21.2	19.9	21	19.9	18.5	17.2
6.66667	18.5	22	21.2	19.9	21	19.8	18.4	17.2
6.83333	18.4	22	21.2	19.9	21	19.8	18.3	17.1
7	18.3	21.9	21.2	19.9	21	19.8	18.3	17.2
7.16667	18.3	21.9	21.2	19.9	21.1	19.8	18.3	17.2
7.33333	18.2	21.9	21.2	19.9	21.2	19.8	18.2	17.2
7.5	18.2	21.9	21.2	19.9	21.2	19.7	18.2	17
7.66667	18.2	21.9	21.2	19.9	21.2	19.7	18.2	17.3
7.83333	18.2	21.9	21.2	20	21.2	19.7	18.2	17.2
8	18.2	21.9	21.2	20	21.2	19.7	18.2	17.2
8.16667	18.2	21.9	21.2	20	21.2	19.7	18.2	17.2
8.33333	18.2	21.8	21.2	20	21.2	19.7	18.2	17.2
8.5	18.2	21.8	21.3	20	21.2	19.6	18.2	17.7
8.66667	18.3	21.8	21.3	20	21.2	19.6	18.3	17.6
8.83333	18.4	21.8	21.3	20	21.2	19.6	18.3	18
9	18.4	21.8	21.3	20	21.2	19.6	18.4	18.3
9.16667	18.5	21.8	21.3	20	21.2	19.6	18.5	18.4
9.33333	18.7	21.8	21.3	20	21.2	19.6	18.6	18.9
9.5	18.9	21.7	21.3	20	21.2	19.5	18.8	19.6
9.66667	19.1	21.7	21.3	20.1	21.2	19.5	19	19.9
9.83333	19.4	21.7	21.3	20.1	21.2	19.5	19.3	20.2
10	19.7	21.7	21.3	20.1	21.2	19.5	19.6	20.5
10.1667	19.9	21.7	21.3	20.1	21.2	19.5	19.8	20.6
10.3333	20.2	21.7	21.3	20.1	21.2	19.5	19.9	20.8
10.5	20.4	21.7	21.3	20.1	21.2	19.4	20.2	21.5
10.6667	20.7	21.7	21.3	20.1	21.2	19.4	20.4	21.8
10.8333	20.9	21.6	21.3	20.1	21.2	19.4	20.6	23.2
11	21.3	21.6	21.3	20.1	21.2	19.4	21	23.7
11.1667	21.6	21.6	21.3	20.1	21.2	19.4	21.6	26.3
11.3333	22.1	21.6	21.3	20.1	21.3	19.4	22.4	27.1
11.5	22.8	21.6	21.3	20.1	21.3	19.3	23.1	27.1
11.6667	23.6	21.6	21.3	20.1	21.3	19.3	23.7	29.1
11.8333	24.2	21.6	21.3	20.1	21.3	19.3	24.3	28.1
12	24.7	21.6	21.3	20.1	21.3	19.3	24.9	31.5
12.1667	25.3	21.6	21.3	20.2	21.3	19.3	25.7	32.8
12.3333	26.1	21.6	21.3	20.2	21.3	19.3	26.5	34.3
12.5	26.8	21.6	21.3	20.2	21.3	19.3	27.2	33.1
12.6667	27.5	21.6	21.3	20.2	21.3	19.3	27.8	34.2
12.8333	28.1	21.6	21.3	20.2	21.3	19.3	27.8	31.3
13	28.4	21.6	21.3	20.2	21.3	19.3	28.1	35.2
13.1667	28.9	21.6	21.3	20.2	21.3	19.3	28.7	35.1
13.3333	29.7	21.6	21.3	20.2	21.3	19.3	29.2	35.4
13.5	30.5	21.6	21.3	20.2	21.3	19.3	29.6	38.1
13.6667	31.2	21.6	21.3	20.2	21.3	19.3	29.6	34.1
13.8333	31.3	21.6	21.3	20.2	21.2	19.3	29.4	32.6
14	31.1	21.6	21.3	20.2	21.2	19.3	29.4	37.7
14.1667	31.5	21.6	21.3	20.2	21.2	19.3	29.9	39
14.3333	32.3	21.6	21.3	20.2	21.2	19.3	30.2	38.7
14.5	33.1	21.6	21.3	20.2	21.2	19.4	30.4	36.2
14.6667	33.5	21.7	21.3	20.2	21.2	19.4	30.6	36.2
14.8333	33.9	21.7	21.3	20.2	21.2	19.4	30.7	36.6
15	34.1	21.7	21.3	20.2	21.2	19.4	30.7	38.4
15.1667	34.7	21.7	21.3	20.2	21.2	19.4	30.9	37.5
15.3333	35.2	21.7	21.3	20.2	21.2	19.5	30.9	36.4
15.5	35.4	21.8	21.3	20.2	21.2	19.5	30.9	36.1
15.6667	35.5	21.8	21.3	20.2	21.2	19.5	30.9	36.7
15.8333	35.6	21.8	21.3	20.2	21.2	19.6	30.7	35.4
16	35.9	21.8	21.3	20.2	21.2	19.6	30.7	33.2
16.1667	35.9	21.9	21.3	20.2	21.2	19.7	30.7	34.2
16.3333	36.1	21.9	21.3	20.2	21.2	19.7	30.6	34.3
16.5	36.1	21.9	21.3	20.2	21.2	19.8	30.6	34.3
16.6667	36.3	22	21.3	20.2	21.2	19.8	30.6	33.2
16.8333	36.3	22	21.3	20.2	21.2	19.8	30.5	33.2
17	36.3	22.1	21.3	20.2	21.2	19.9	30.4	32.2
17.1667	35.9	22.2	21.3	20.2	21.2	19.9	30.4	31.9
17.3333	35.6	22.2	21.3	20.2	21.2	20	30.6	32.2
17.5	35.6	22.3	21.3	20.3	21.2	20.1	30.6	32.3
17.6667	35.4	22.3	21.3	20.3	21.2	20.1	30.7	31.9
17.8333	35	22.4	21.3	20.3	21.2	20.2	30.7	31.5
18	34.6	22.4	21.3	20.3	21.2	20.2	30.6	30.4
18.1667	33.7	22.4	21.3	20.3	21.2	20.3	30.4	29.1
18.3333	32.6	22.5	21.3	20.3	21.2	20.3	30	28.5
18.5	31.5	22.5	21.3	20.3	21.2	20.4	29.6	28
18.6667	30.4	22.6	21.3	20.3	21.2	20.4	29.2	27.7
18.8333	29.4	22.6	21.3	20.3	21.2	20.5	28.9	27.2
19	28.7	22.7	21.3	20.3	21.2	20.5	28.7	27.2
19.1667	28.3	22.7	21.4	20.3	21.2	20.6	28.4	27
19.3333	27.8	22.7	21.4	20.3	21.3	20.7	28.1	26.7
19.5	27.4	22.9	21.4	20.3	21.3	20.7	28	26.5
19.6667	27.1	22.9	21.4	20.3	21.3	20.8	27.7	26.4
19.8333	26.8	22.9	21.4	20.3	21.3	20.8	27.5	26.3
20	26.6	23	21.4	20.3	21.3	20.9	27.2	26
20.1667	26.4	23	21.4	20.3	21.3	20.9	27.1	25.8
20.3333	26.2	23.1	21.4	20.3	21.3	21	26.8	25.5
20.5	25.9	23.1	21.4	20.3	21.3	21	26.6	25.4
20.6667	25.8	23.1	21.5	20.3	21.3	21	26.5	25.2
20.8333	25.7	23.2	21.5	20.3	21.3	21.2	26.4	24.9
21	25.5	23.2	21.5	20.3	21.4	21.2	26.2	24.9
21.1667	25.3	23.2	21.5	20.4	21.4	21.2	25.9	24.3
21.3333	25.1	23.3	21.5	20.4	21.4	21.3	25.8	24.3
21.5	24.9	23.3	21.5	20.4	21.4	21.3	25.7	23.8
21.6667	24.7	23.3	21.5	20.4	21.4	21.3	25.4	23.7
21.8333	24.6	23.3	21.6	20.4	21.4	21.4	25.3	23.6
22	24.4	23.3	21.6	20.4	21.4	21.4	25.1	23.5
22.1667	24.2	23.5	21.6	20.4	21.5	21.4	25	23.3
22.3333	24.1	23.5	21.6	20.4	21.5	21.4	24.8	23.2
22.5	24	23.5	21.6	20.4	21.5	21.5	24.7	23.1
22.6667	23.9	23.5	21.7	20.5	21.5	21.5	24.6	23.2
22.8333	23.8	23.5	21.7	20.5	21.5	21.5	24.5	23.1
23	23.7	23.6	21.7	20.5	21.6	21.5	24.3	22.9
23.1667	23.6	23.6	21.7	20.5	21.6	21.5	24.2	22.7
23.3333	23.6	23.6	21.7	20.5	21.6	21.5	24.2	22.6
23.5	23.5	23.6	21.8	20.5	21.6	21.6	24.1	22.7
23.6667	23.3	23.6	21.8	20.5	21.6	21.6	24	22.6
23.8333	23.3	23.6	21.8	20.5	21.7	21.6	23.8	22
24	23.2	23.6	21.8	20.6	21.7	21.6	23.6	21.1
24.1667	23	23.7	21.8	20.6	21.7	21.6	23.4	20.5
