# Supplementary material for: Temperature Load Parameters and Thermal Effects of a Long‐Span Concrete‐Filled Steel Tube Arch Bridge in Tibet
Source: Hindawi journal article supplement (doi:10.1155/2020/9710613), 2020-01-01
Supplement: f1 [file 9710613.f1.zip › 9710613.f1/fig.6(b).xls]

## Sheet: Sheet1
time	1	2	3	4	5	6	7	0
0.166667	2.5	1.9	1.1	0.8	-0.1	0.1	1	3.6
0.333333	2.4	1.9	1.1	0.8	-0.1	0.2	1	3.7
0.5	2.4	1.9	1.1	0.8	-0.1	0.2	0.9	3.5
0.666667	2.3	2	1.1	0.8	-0.1	0.2	0.8	2.4
0.833333	2.1	2	1.1	0.8	-0.1	0.2	0.7	2
1	2	2	1.1	0.8	-0.1	0.2	0.5	1.3
1.16667	1.8	2	1.1	0.8	-0.1	0.2	0.4	1.1
1.33333	1.6	2	1.1	0.8	-0.1	0.3	0.3	0.8
1.5	1.4	2	1.1	0.8	-0.1	0.3	0.1	-0.5
1.66667	1.2	2	1.2	0.8	-0.1	0.3	-0.1	-0.7
1.83333	1.1	2	1.2	0.8	-0.1	0.3	-0.3	-0.1
2	0.9	2	1.2	0.8	0.1	0.3	-0.4	-0.2
2.16667	0.8	2	1.2	0.8	0.1	0.3	-0.5	-0.2
2.33333	0.6	2	1.2	0.8	0.1	0.3	-0.6	-0.4
2.5	0.5	2	1.2	0.8	0.1	0.4	-0.7	-1.7
2.66667	0.4	2	1.2	0.8	0.1	0.4	-0.8	-1.8
2.83333	0.3	2	1.2	0.8	0.1	0.4	-0.9	-1.3
3	0.1	2.1	1.2	0.9	0.1	0.4	-1	-1.9
3.16667	-0.1	2.1	1.2	0.9	0.1	0.4	-1.1	-1.6
3.33333	-0.2	2.1	1.2	0.9	0.1	0.4	-1.2	-2
3.5	-0.3	2.1	1.2	0.9	0.2	0.4	-1.2	-2.4
3.66667	-0.4	2.1	1.2	0.9	0.2	0.4	-1.3	-2.5
3.83333	-0.5	2.1	1.2	0.9	0.2	0.4	-1.4	-2.7
4	-0.6	2.1	1.3	0.9	0.2	0.4	-1.5	-3
4.16667	-0.7	2.1	1.3	0.9	0.2	0.4	-1.6	-2.8
4.33333	-0.7	2.1	1.3	0.9	0.2	0.4	-1.7	-2.1
4.5	-0.8	2.1	1.3	0.9	0.2	0.4	-1.7	-2.7
4.66667	-0.9	2.1	1.3	0.9	0.2	0.4	-1.8	-2.7
4.83333	-0.9	2.1	1.3	0.9	0.2	0.4	-1.9	-3.5
5	-1	2	1.3	0.9	0.2	0.4	-2	-3
5.16667	-1.1	2	1.3	0.9	0.2	0.4	-2.1	-3.7
5.33333	-1.2	2	1.3	0.9	0.2	0.4	-2.2	-4.3
5.5	-1.3	2	1.3	0.9	0.2	0.4	-2.3	-3.8
5.66667	-1.4	2	1.3	0.9	0.2	0.4	-2.3	-3.5
5.83333	-1.4	2	1.3	0.9	0.3	0.4	-2.4	-3.4
6	-1.5	2	1.4	1	0.3	0.4	-2.5	-3.8
6.16667	-1.6	2	1.4	1	0.3	0.4	-2.6	-3.7
6.33333	-1.6	2	1.4	1	0.3	0.4	-2.6	-4.3
6.5	-1.7	2	1.4	1	0.3	0.4	-2.7	-5.2
6.66667	-1.8	2	1.4	1	0.3	0.4	-2.8	-4.9
6.83333	-1.9	2	1.4	1	0.3	0.4	-2.9	-5
7	-1.9	2	1.4	1	0.3	0.4	-2.9	-5.4
7.16667	-2	2	1.4	1	0.3	0.4	-3	-4.2
7.33333	-2.1	2	1.4	1	0.3	0.3	-3.1	-4.2
7.5	-2.1	1.9	1.4	1	0.3	0.3	-3.1	-4.8
7.66667	-2.2	1.9	1.4	1	0.3	0.3	-3.2	-4.3
7.83333	-2.2	1.9	1.4	1	0.3	0.3	-3.3	-4.8
8	-2.3	1.9	1.4	1	0.3	0.3	-3.3	-5.2
8.16667	-2.3	1.9	1.4	1	0.3	0.3	-3.4	-4.7
8.33333	-2.4	1.9	1.4	1	0.3	0.3	-3.5	-5.3
8.5	-2.4	1.9	1.4	1	0.3	0.3	-3.5	-5
8.66667	-2.5	1.8	1.4	1	0.3	0.2	-3.6	-5.1
8.83333	-2.6	1.8	1.4	1	0.3	0.2	-3.7	-5.2
9	-2.6	1.8	1.4	1.1	0.3	0.2	-3.7	-5.8
9.16667	-2.7	1.8	1.4	1.1	0.3	0.2	-3.8	-5.8
9.33333	-2.7	1.8	1.4	1.1	0.4	0.2	-3.8	-5.5
9.5	-2.8	1.8	1.4	1.1	0.4	0.2	-3.8	-5.5
9.66667	-2.8	1.8	1.4	1.1	0.4	0.1	-3.8	-5.5
9.83333	-2.9	1.7	1.4	1.1	0.4	0.1	-3.9	-5.6
10	-2.9	1.7	1.4	1.1	0.4	0.1	-3.8	-6
10.1667	-2.9	1.7	1.4	1.1	0.4	0.1	-3.8	-6.1
10.3333	-2.9	1.7	1.4	1.1	0.4	-0.1	-3.8	-5.8
10.5	-2.9	1.7	1.4	1.1	0.4	-0.1	-3.8	-5.4
10.6667	-2.9	1.7	1.4	1.1	0.4	-0.1	-3.7	-5.2
10.8333	-2.8	1.7	1.4	1.1	0.4	-0.1	-3.4	4.2
11	-2.3	1.6	1.4	1.1	0.4	-0.1	-3.2	6.5
11.1667	-1.6	1.6	1.4	1.1	0.4	-0.1	-3	5.7
11.3333	-1	1.6	1.4	1.1	0.4	-0.2	-2.8	6.7
11.5	-0.3	1.6	1.4	1.1	0.4	-0.2	-2.5	5.9
11.6667	0.4	1.6	1.4	1.1	0.4	-0.2	-2.3	7.5
11.8333	1.1	1.5	1.4	1.1	0.4	-0.2	-2	10.8
12	1.8	1.5	1.4	1.1	0.4	-0.2	-1.8	13.2
12.1667	2.6	1.5	1.4	1.2	0.4	-0.2	-1.5	16.6
12.3333	3.3	1.5	1.4	1.2	0.4	-0.2	-1.2	18
12.5	4.1	1.5	1.4	1.2	0.4	-0.3	-0.9	20
12.6667	4.8	1.5	1.4	1.2	0.4	-0.3	-0.6	16.9
12.8333	5.5	1.5	1.4	1.2	0.4	-0.3	-0.3	22.2
13	6.2	1.5	1.4	1.2	0.4	-0.3	0.3	21.2
13.1667	6.7	1.4	1.4	1.2	0.3	-0.3	0.5	16.4
13.3333	7.3	1.4	1.4	1.2	0.3	-0.3	0.9	15.8
13.5	8	1.4	1.4	1.2	0.3	-0.3	1.1	27.7
13.6667	8.7	1.4	1.4	1.2	0.3	-0.3	1.3	21.3
13.8333	9.2	1.4	1.4	1.2	0.3	-0.2	1.5	20.6
14	9.5	1.4	1.4	1.2	0.3	-0.2	1.8	18.3
14.1667	9.8	1.4	1.4	1.2	0.3	-0.2	1.9	22.6
14.3333	9.9	1.4	1.3	1.2	0.3	-0.2	2.1	18.6
14.5	10	1.4	1.3	1.2	0.3	-0.2	2.3	19.2
14.6667	10.1	1.4	1.3	1.2	0.3	-0.2	2.5	17.7
14.8333	10.4	1.4	1.3	1.2	0.3	-0.1	2.7	25
15	10.7	1.5	1.3	1.2	0.3	-0.1	2.8	17.2
15.1667	10.9	1.5	1.3	1.2	0.3	-0.1	3	21
15.3333	10.9	1.5	1.3	1.2	0.3	-0.1	3.2	20.1
15.5	10.8	1.5	1.3	1.1	0.3	0.1	3.3	17.1
15.6667	10.6	1.5	1.3	1.1	0.3	0.1	3.5	17.1
15.8333	10.4	1.5	1.3	1.1	0.3	0.2	3.6	15.3
16	10.3	1.6	1.3	1.1	0.3	0.2	3.8	14.7
16.1667	10.4	1.6	1.3	1.1	0.3	0.2	3.8	17.5
16.3333	10.5	1.6	1.3	1.1	0.3	0.3	3.8	17.8
16.5	10.6	1.7	1.2	1.1	0.3	0.3	3.7	19.5
16.6667	10.5	1.7	1.2	1.1	0.3	0.4	3.5	15.1
16.8333	9.9	1.7	1.2	1.1	0.3	0.4	3.4	11.5
17	9.1	1.8	1.2	1.1	0.3	0.4	3.2	9.7
17.1667	8.4	1.8	1.2	1.1	0.3	0.5	3.2	8.7
17.3333	7.7	1.8	1.2	1.1	0.3	0.5	3.1	8.8
17.5	7.1	1.8	1.2	1.1	0.3	0.5	3	7.8
17.6667	6.6	1.9	1.2	1.1	0.3	0.6	2.9	7.8
17.8333	6.3	1.9	1.2	1.1	0.3	0.6	2.8	7.6
18	5.9	2	1.2	1.1	0.3	0.7	2.9	7.4
18.1667	5.7	2	1.2	1.1	0.3	0.7	2.8	7.3
18.3333	5.6	2	1.2	1.1	0.3	0.7	2.8	7.3
18.5	5.4	2.1	1.2	1.1	0.3	0.8	2.7	6.9
18.6667	5.2	2.1	1.2	1.1	0.3	0.8	2.7	6.7
18.8333	5.1	2.2	1.2	1.1	0.4	0.8	2.6	6.8
19	4.9	2.2	1.2	1.1	0.4	0.8	2.5	6.4
19.1667	4.8	2.2	1.3	1.1	0.4	0.9	2.5	6
19.3333	4.7	2.3	1.3	1.1	0.4	0.9	2.4	5.8
19.5	4.5	2.3	1.3	1.1	0.4	0.9	2.3	5.6
19.6667	4.4	2.4	1.3	1.1	0.4	0.9	2.2	5.2
19.8333	4.2	2.4	1.3	1.1	0.4	1	2	4.7
20	4.1	2.4	1.3	1.1	0.4	1	1.9	4.6
20.1667	3.9	2.4	1.3	1.1	0.4	1	1.8	3.7
20.3333	3.8	2.5	1.3	1.1	0.4	1	1.7	3.5
20.5	3.6	2.5	1.3	1.1	0.4	1	1.5	3.4
20.6667	3.4	2.6	1.4	1.1	0.4	1	1.4	2.9
20.8333	3.2	2.6	1.4	1.1	0.4	1.1	1.2	2.5
21	3	2.6	1.4	1.2	0.4	1.1	1.1	1.7
21.1667	2.9	2.6	1.4	1.2	0.4	1.1	1.1	1.8
21.3333	2.8	2.6	1.4	1.2	0.5	1.1	1.2	1.9
21.5	2.8	2.7	1.4	1.2	0.5	1.1	1.2	4.1
21.6667	2.8	2.7	1.4	1.2	0.5	1.2	1.2	4.1
21.8333	2.8	2.7	1.4	1.2	0.5	1.2	1.1	3.7
22	2.8	2.8	1.5	1.2	0.5	1.2	1.1	3.7
22.1667	2.8	2.8	1.5	1.2		1.2	1	3.6
22.3333	2.8	2.8	1.5	1.2		1.2	1	3.3
22.5	2.8	2.8	1.5	1.2		1.2	0.9	3.3
22.6667	2.7	2.8	1.5	1.2		1.2	0.8	2.8
22.8333	2.6	2.8	1.5	1.2			0.7	2.2
23	2.5	2.9	1.5	1.2			0.7	2.4
23.1667	2.4	2.9	1.6	1.2			0.6	2
23.3333	2.3	2.9	1.6	1.2			0.5	2
23.5	2.2	2.9	1.6	1.2			0.5	1.8
23.6667	2.2	2.9	1.6	1.3			0.4	2
23.8333	2.1	2.9	1.6	1.3			0.4	1.6
24		2.9	1.7	1.3				1.3
		3	1.7	1.3
