# Supplementary material for: Temperature Load Parameters and Thermal Effects of a Long‐Span Concrete‐Filled Steel Tube Arch Bridge in Tibet
Source: Hindawi journal article supplement (doi:10.1155/2020/9710613), 2020-01-01
Supplement: f1 [file 9710613.f1.zip › 9710613.f1/fig.8(a).xls]

## Sheet: Sheet1
in winter		in summer
x	y	x	y
10.5	0.8	36.3	0.8
1.6	0.55	22	0.55
1.3	0.25	21.3	0.25
1.1	0	20.2	0
0.3	-0.25	21.2	-0.25
0.3	-0.55	19.8	-0.55
3.8	-0.8	30.6	-0.8
