# Supplementary material for: Temperature Load Parameters and Thermal Effects of a Long‐Span Concrete‐Filled Steel Tube Arch Bridge in Tibet
Source: Hindawi journal article supplement (doi:10.1155/2020/9710613), 2020-01-01
Supplement: f1 [file 9710613.f1.zip › 9710613.f1/fig.10(a).xls]

## Sheet: Sheet1
location	temperature rise		temperature drop
	model1	model2	model1	model2
0	7.9	5	66.3	37.3
L/4	-3.44	-3.47	0.31	10.2
L/2	0.98	1.14	0.76	0.29
3L/4	-3.44	-3.47	0.31	10.2
L	7.9	5	66.3	37.3
