# Supplementary material for: Temperature Load Parameters and Thermal Effects of a Long‐Span Concrete‐Filled Steel Tube Arch Bridge in Tibet
Source: Hindawi journal article supplement (doi:10.1155/2020/9710613), 2020-01-01
Supplement: f1 [file 9710613.f1.zip › 9710613.f1/fig.10(b).xls]

## Sheet: Sheet1
location	temperature rise		temperature drop
	model1	model2	model1	model2
0	1.85	1.17	6.33	2.95
L/4	0.31	0.3	-0.42	-0.4
L/2	0.76	0.78	-1.45	-1.47
3L/4	0.31	0.3	-0.42	-0.4
L	1.85	1.17	6.33	2.95
