# Supplementary material for: Temperature Load Parameters and Thermal Effects of a Long‐Span Concrete‐Filled Steel Tube Arch Bridge in Tibet
Source: Hindawi journal article supplement (doi:10.1155/2020/9710613), 2020-01-01
Supplement: f1 [file 9710613.f1.zip › 9710613.f1/fig.11(a).xls]

## Sheet: Sheet1
location	temperature rise		temperature drop
	model1	model2	model1	model2
0	0.2	0.1	48.3	27.1
L/4	-0.09	-0.09	7.31	7.39
L/2	0.03	0.03	0.37	0.21
3L/4	-0.09	-0.09	7.31	7.39
L	0.2	0.1	48.3	27.1
