# Supplementary material for: Temperature Load Parameters and Thermal Effects of a Long‐Span Concrete‐Filled Steel Tube Arch Bridge in Tibet
Source: Hindawi journal article supplement (doi:10.1155/2020/9710613), 2020-01-01
Supplement: f1 [file 9710613.f1.zip › 9710613.f1/fig.12(a).xls]

## Sheet: Sheet1
location	standard		proposed
	model1	model2	model1	model2
0	66.3	37.3	48.3	27.1
L/4	0.31	10.2	7.31	7.39
L/2	0.76	0.29	0.37	0.21
3L/4	0.31	10.2	7.31	7.39
L	66.3	37.3	48.3	27.1
