# Supplementary material for: Temperature Load Parameters and Thermal Effects of a Long‐Span Concrete‐Filled Steel Tube Arch Bridge in Tibet
Source: Hindawi journal article supplement (doi:10.1155/2020/9710613), 2020-01-01
Supplement: f1 [file 9710613.f1.zip › 9710613.f1/fig.12(b).xls]

## Sheet: Sheet1
location	standard		proposed
	model1	model2	model1	model2
0	6.33	2.95	4.61	2.15
L/4	-0.42	-0.4	-0.3	-0.26
L/2	-1.45	-1.47	-1.61	-1.07
3L/4	-0.42	-0.4	-0.3	-0.26
L	6.33	2.95	4.61	2.15
